# Supplementary material for: A late-stage functionalization tool: sulfonyl fluoride mediated deoxymethylation of phenols
Source: Royal Society of Chemistry journal article supplement (doi:10.1039/d2ob01523d), 2022-01-01

# Supporting Information

## An Effective Late-Stage Functionalization Tool: Direct Deoxymethylation of Phenols

Guofu Zhang,<sup>a</sup> Chenfei Guan,<sup>a</sup> Linjun Han,<sup>a</sup> Yiyong Zhao,<sup>b</sup> and Chengrong Ding<sup>\*a</sup>

<sup>a</sup>*College of Chemical Engineering, Zhejiang University of Technology, Hangzhou, Zhejiang 310014, P. R. China; fax: +86-571-88320147; E-mail: [dingcr@zjut.edu.cn](mailto:dingcr@zjut.edu.cn)*

<sup>b</sup>*Zhejiang Ecological Environment Low Carbon Development Center, Hangzhou, 310012, P. R. China.*

## Table of Contents

|                                                                                            |          |
|--------------------------------------------------------------------------------------------|----------|
| 1. General Information.....                                                                | S2       |
| 2. Optimization of Reaction Conditions.....                                                | S3-S5    |
| 3. Experimental details and characterization of products.....                              | S6-S20   |
| 4. Gram-Scale Reaction.....                                                                | S21      |
| 5. Experiments for parts per million (ppm) level catalysts.....                            | S22      |
| 6. Experiments for Iterative Reaction.....                                                 | S23-S24  |
| 7. Mechanistic Studies.....                                                                | S25-S30  |
| 8. Copies of <sup>1</sup> H, <sup>13</sup> C and <sup>19</sup> F spectra for products..... | S31-S119 |

## Experimental Section

### 1: General information.

All source materials and reagents were purchased from commercial suppliers and are used without pretreatment unless otherwise indicated. All experiments involving palladium were performed using standard Schlenk techniques under nitrogen unless stated otherwise. All results were detected using thin-layer chromatography (TLC) on commercial silica gel plates. Visualization of the developed plates was performed under UV light (254 nm). Rapid column chromatography was performed on silica gel. Column chromatography was performed with silica gel (300-400 mesh) using various combinations of non-aqueous organic solvents as eluents.

NMR spectra were recorded in CDCl<sub>3</sub> or DMSO-d<sub>6</sub> on Bruker AVANCE III 400/600 MHz (<sup>1</sup>H NMR) and 101 MHz (<sup>13</sup>C NMR) instruments with TMS as the internal standard and the following abbreviations were used to identify the multiplicities: s = singlet, d = doublet, t = triplet, q = quartet, m = multiplet, dd = doublet of doublets, dt = doublet of triplets, dq = doublet of quartets, br = broad and all combinations thereof can be explained by their integral parts. Coupling constant (J) was reported in hertz unit (Hz). The high resolution mass spectra (HRMS) were recorded on an Agilent 6210 LC/TOF spectrometer. High-resolution mass spectrometry analysis was performed on the ThermoFisher ITQ1100.

## 2: Optimization of reaction conditions

### General Procedure for Reaction Optimization.

A 25mL Schlenk flask equipped with a stirring bar is filled with Aryl phenols (neat, 0.2 mmol, 1.0 equiv.), Et<sub>3</sub>N (1.0 mmol, 5.0 equiv.), dioxane (1 mL). Under positive pressure of SO<sub>2</sub>F<sub>2</sub> gas, five evacuation/backfill cycles are performed under high vacuum to fill the reaction tube and vigorous stirring at room temperature for 2h.<sup>1</sup> Then addition Pd(OAc)<sub>2</sub> (typically, 5 mol%), ligand (typically, 6 mol%), base (typically, 0.4 mmol, 2.0 equiv.), “Me” reagent (typically, 0.2 mmol, 1.0 equiv.), solvent (1 mL). Under a positive pressure of nitrogen and five evacuations/backfilling cycles under high vacuum. The mixture was allowed to react. The reaction was quenched by water and the reaction mixture was extracted with EA for three times. The combined organic layer was washed with brine and dried over anhydrous Na<sub>2</sub>SO<sub>4</sub>. The solvent was removed under vacuum and the residue was purified by a flash column chromatography on silica gel using ethyl acetate and petroleum as eluent.

1. J. Dong, L. Krasnova, M. G. Finn and K. B. Sharpless, *Angew. Chem., Int. Ed.*, 2014, **53**, 9430-9448.

**Table S1. Optimization of the reaction conditions.<sup>a</sup>**

| <div style="text-align: center;"> 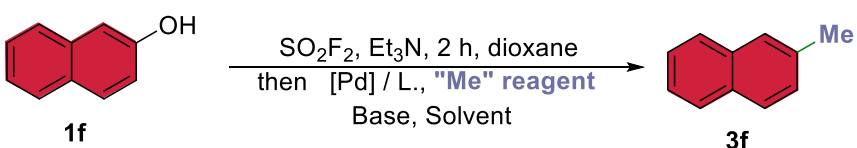 <p>1f <span style="margin-left: 150px;"></span> 3f</p> </div> |                                                  |                                       |                          |                  |                  |                           |
|------------------------------------------------------------------------------------------------------------------------------------------------------------------------------------|--------------------------------------------------|---------------------------------------|--------------------------|------------------|------------------|---------------------------|
| Entry                                                                                                                                                                              | "Me" reagent                                     | Base (equiv.)                         | Cat. (mol%)              | Ligand (mol%)    | Solvent          | 3f Yield (%) <sup>b</sup> |
| 1                                                                                                                                                                                  | MeI                                              | K <sub>3</sub> PO <sub>4</sub> (2.0)  | Pd(OAc) <sub>2</sub> (5) | DPPE (6)         | Dioxane          | n.r.                      |
| 2                                                                                                                                                                                  | (CH <sub>3</sub> O) <sub>2</sub> SO <sub>2</sub> | K <sub>3</sub> PO <sub>4</sub> (2.0)  | Pd(OAc) <sub>2</sub> (5) | DPPE (6)         | Dioxane          | n.r.                      |
| 3                                                                                                                                                                                  | ZnMe <sub>2</sub>                                | K <sub>3</sub> PO <sub>4</sub> (2.0)  | Pd(OAc) <sub>2</sub> (5) | DPPE (6)         | Dioxane          | n.r.                      |
| 4                                                                                                                                                                                  | MeMgBr                                           | K <sub>3</sub> PO <sub>4</sub> (2.0)  | Pd(OAc) <sub>2</sub> (5) | DPPE (6)         | Dioxane          | n.r.                      |
| 5                                                                                                                                                                                  | MeBF <sub>3</sub> K                              | K <sub>3</sub> PO <sub>4</sub> (2.0)  | Pd(OAc) <sub>2</sub> (5) | DPPE (6)         | Dioxane          | 45                        |
| 6                                                                                                                                                                                  | MeB(OH) <sub>2</sub>                             | K <sub>3</sub> PO <sub>4</sub> (2.0)  | Pd(OAc) <sub>2</sub> (5) | DPPE (6)         | Dioxane          | 71                        |
| 7                                                                                                                                                                                  | TMB                                              | K <sub>3</sub> PO <sub>4</sub> (2.0)  | Pd(OAc) <sub>2</sub> (5) | DPPE (6)         | Dioxane          | 99                        |
| 8                                                                                                                                                                                  | TMB                                              | KH <sub>2</sub> PO <sub>3</sub> (2.0) | Pd(OAc) <sub>2</sub> (5) | DPPE (6)         | Dioxane          | 15                        |
| 9                                                                                                                                                                                  | TMB                                              | KHCO <sub>3</sub> (2.0)               | Pd(OAc) <sub>2</sub> (5) | DPPE (6)         | Dioxane          | 24                        |
| 10                                                                                                                                                                                 | TMB                                              | Cs <sub>2</sub> CO <sub>3</sub> (2.0) | Pd(OAc) <sub>2</sub> (5) | DPPE (6)         | Dioxane          | 76                        |
| 11                                                                                                                                                                                 | TMB                                              | t-BuONa (2.0)                         | Pd(OAc) <sub>2</sub> (5) | DPPE (6)         | Dioxane          | 56                        |
| 12                                                                                                                                                                                 | TMB                                              | DBU (2.0)                             | Pd(OAc) <sub>2</sub> (5) | DPPE (6)         | Dioxane          | n.r.                      |
| 13                                                                                                                                                                                 | TMB                                              | DIPEA (2.0)                           | Pd(OAc) <sub>2</sub> (5) | DPPE (6)         | Dioxane          | n.r.                      |
| 14                                                                                                                                                                                 | TMB                                              | Et <sub>3</sub> N (2.0)               | Pd(OAc) <sub>2</sub> (5) | DPPE (6)         | Dioxane          | n.r.                      |
| 15                                                                                                                                                                                 | TMB                                              | DMAP (2.0)                            | Pd(OAc) <sub>2</sub> (5) | DPPE (6)         | Dioxane          | n.r.                      |
| 16                                                                                                                                                                                 | TMB                                              | K <sub>3</sub> PO <sub>4</sub> (2.0)  | Pd(OAc) <sub>2</sub> (5) | TNP (6)          | Dioxane          | 15                        |
| 17                                                                                                                                                                                 | TMB                                              | K <sub>3</sub> PO <sub>4</sub> (2.0)  | Pd(OAc) <sub>2</sub> (5) | Cphos (6)        | Dioxane          | 88                        |
| 18                                                                                                                                                                                 | TMB                                              | K <sub>3</sub> PO <sub>4</sub> (2.0)  | Pd(OAc) <sub>2</sub> (5) | JnhnPhos (6)     | Dioxane          | 93                        |
| 19                                                                                                                                                                                 | TMB                                              | K <sub>3</sub> PO <sub>4</sub> (2.0)  | Pd(OAc) <sub>2</sub> (5) | S-Phos (6)       | Dioxane          | 97                        |
| 20                                                                                                                                                                                 | TMB                                              | K <sub>3</sub> PO <sub>4</sub> (2.0)  | Pd(OAc) <sub>2</sub> (5) | Ruphos (6)       | Dioxane          | 99                        |
| 21                                                                                                                                                                                 | TMB                                              | K <sub>3</sub> PO <sub>4</sub> (2.0)  | Pd(OAc) <sub>2</sub> (5) | tert-Butyl XPhos | Dioxane          | 97                        |
| 22                                                                                                                                                                                 | TMB                                              | K <sub>3</sub> PO <sub>4</sub> (2.0)  | Pd(OAc) <sub>2</sub> (5) | Ruphos (6)       | THF              | 18                        |
| 23                                                                                                                                                                                 | TMB                                              | K <sub>3</sub> PO <sub>4</sub> (2.0)  | Pd(OAc) <sub>2</sub> (5) | Ruphos (6)       | DMF              | 72                        |
| 24                                                                                                                                                                                 | TMB                                              | K <sub>3</sub> PO <sub>4</sub> (2.0)  | Pd(OAc) <sub>2</sub> (5) | Ruphos (6)       | DMSO             | 33                        |
| 25                                                                                                                                                                                 | TMB                                              | K <sub>3</sub> PO <sub>4</sub> (2.0)  | Pd(OAc) <sub>2</sub> (5) | Ruphos (6)       | CCl <sub>4</sub> | n.r.                      |
| 26                                                                                                                                                                                 | TMB                                              | K <sub>3</sub> PO <sub>4</sub> (2.0)  | Pd(OAc) <sub>2</sub> (5) | Ruphos (6)       | EDC              | n.r.                      |
| 27                                                                                                                                                                                 | TMB                                              | K <sub>3</sub> PO <sub>4</sub> (2.0)  | Pd(OAc) <sub>2</sub> (5) | Ruphos (6)       | H <sub>2</sub> O | n.r.                      |
| 28                                                                                                                                                                                 | TMB                                              | K <sub>3</sub> PO <sub>4</sub> (1.0)  | Pd(OAc) <sub>2</sub> (5) | Ruphos (6)       | Dioxane          | 79                        |
| 29                                                                                                                                                                                 | TMB                                              | K <sub>3</sub> PO <sub>4</sub> (1.5)  | Pd(OAc) <sub>2</sub> (5) | Ruphos (6)       | Dioxane          | 87                        |

|                 |     |                                      |                           |              |         |      |
|-----------------|-----|--------------------------------------|---------------------------|--------------|---------|------|
| 30              | TMB | K <sub>3</sub> PO <sub>4</sub> (3.0) | Pd(OAc) <sub>2</sub> (5)  | Ruphos (6)   | Dioxane | 99   |
| 31              | TMB | K <sub>3</sub> PO <sub>4</sub> (2.0) | Pd(OAc) <sub>2</sub> (10) | Ruphos (15)  | Dioxane | 94   |
| 32              | TMB | K <sub>3</sub> PO <sub>4</sub> (2.0) | Pd(OAc) <sub>2</sub> (7)  | Ruphos (9)   | Dioxane | 98   |
| 33              | TMB | K <sub>3</sub> PO <sub>4</sub> (2.0) | Pd(OAc) <sub>2</sub> (2)  | Ruphos (3)   | Dioxane | 93   |
| 34 <sup>c</sup> | TMB | K <sub>3</sub> PO <sub>4</sub> (2.0) | Pd(OAc) <sub>2</sub> (1)  | Ruphos (1.5) | Dioxane | 98   |
| 35 <sup>d</sup> | TMB | K <sub>3</sub> PO <sub>4</sub> (2.0) | Pd(OAc) <sub>2</sub> (5)  | Ruphos (6)   | Dioxane | 99   |
| 36 <sup>e</sup> | TMB | K <sub>3</sub> PO <sub>4</sub> (2.0) | Pd(OAc) <sub>2</sub> (5)  | Ruphos (6)   | Dioxane | 64   |
| 37 <sup>f</sup> | TMB | K <sub>3</sub> PO <sub>4</sub> (2.0) | Pd(OAc) <sub>2</sub> (5)  | Ruphos (6)   | Dioxane | n.r. |
| 38 <sup>g</sup> | TMB | K <sub>3</sub> PO <sub>4</sub> (2.0) | Pd(OAc) <sub>2</sub> (5)  | Ruphos (6)   | Dioxane | 61   |
| 39 <sup>h</sup> | TMB | K <sub>3</sub> PO <sub>4</sub> (2.0) | Pd(OAc) <sub>2</sub> (5)  | Ruphos (6)   | Dioxane | 63   |
| 40 <sup>i</sup> | TMB | K <sub>3</sub> PO <sub>4</sub> (2.0) | Pd(OAc) <sub>2</sub> (5)  | Ruphos (6)   | Dioxane | n.r. |
| 41 <sup>j</sup> | TMB | K <sub>3</sub> PO <sub>4</sub> (2.0) | Pd(OAc) <sub>2</sub> (5)  | Ruphos (6)   | Dioxane | n.r. |
| 41 <sup>k</sup> | TMB | K <sub>3</sub> PO <sub>4</sub> (2.0) | Pd(OAc) <sub>2</sub> (5)  | Ruphos (6)   | Dioxane | 99   |

<sup>a</sup> Reaction conditions: **1f** (0.2 mmol), Et<sub>3</sub>N (1.0 mmol, 5.0 eq.), dioxane (0.2 M), r.t., 2 h, under SO<sub>2</sub>F<sub>2</sub> gas atmosphere. Then addition “Me” reagent (0.2 mmol, 1.0 eq.), Pd(OAc)<sub>2</sub>, Ligand, Base, Solvent (0.2 M), 120 °C, 2.0 h; Under nitrogen atmosphere.

<sup>b</sup> Isolated yield.

<sup>c</sup> The time of methylation reaction is 6 h

<sup>d</sup> The time of methylation reaction is 8 h

<sup>e</sup> The time of methylation reaction is 1 h

<sup>f</sup> r.t. Instead of 120 °C.

<sup>g</sup> 80 °C Instead of 120 °C.

<sup>h</sup> 130°C Instead of 120 °C.

<sup>i</sup> air Instead of nitrogen.

<sup>j</sup> SO<sub>2</sub>F<sub>2</sub> gas Instead of nitrogen.

<sup>k</sup> 0.1 mmol of TMB.

TMB = trimethylboroxine, n.r. = no reaction, r.t.= room temperature.

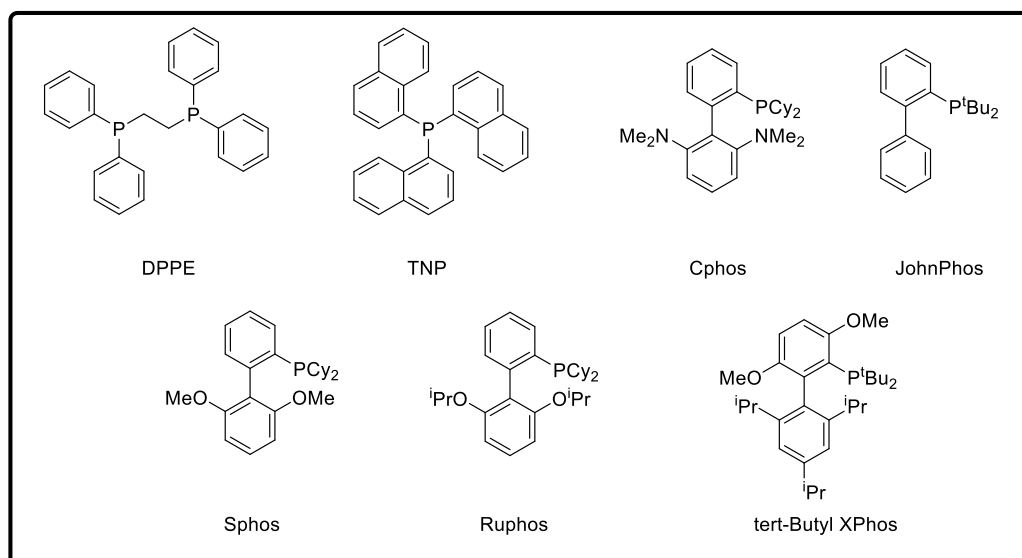

### 3: Experimental details and characterization of products

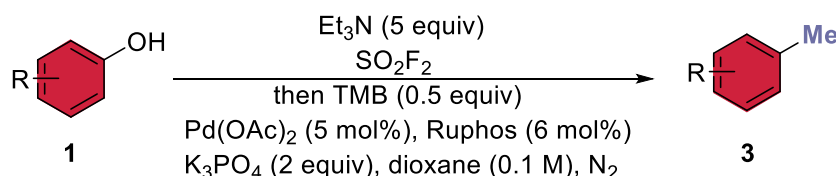

#### General procedure for the synthesis of Deoxymethylation of Phenols (1a-1w):

A 25mL Schlenk flask equipped with a stirring bar is filled with Aryl phenols (0.2 mmol, 1.0 equiv.),  $\text{Et}_3\text{N}$  (1.0 mmol, 5.0 equiv.), dioxane (1 mL). Under positive pressure of  $\text{SO}_2\text{F}_2$  gas, five evacuation/backfill cycles are performed under high vacuum to fill the reaction tube and vigorous stirring at room temperature for 2h. Then addition  $\text{Pd}(\text{OAc})_2$  (5 mol%), RuPhos (6 mol%),  $\text{K}_3\text{PO}_4$  (0.4 mmol, 2.0 equiv.), trimethylboroxine (typically, 0.1 mmol, 0.5 equiv.), dioxane (1 mL). Under a positive pressure of nitrogen and five evacuations/backfilling cycles under high vacuum. The mixture was allowed to react for 2 h at 120 °C. The reaction was quenched by water and the reaction mixture was extracted with EA for three times. The combined organic layer was washed with brine and dried over anhydrous  $\text{Na}_2\text{SO}_4$ . The solvent was removed under vacuum and the residue was purified by a flash column chromatography on silica gel using ethyl acetate and petroleum as eluent to provide the desired products.

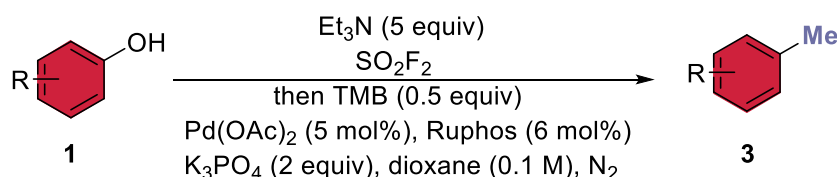

#### General procedure for the synthesis of Deoxymethylation of Phenols in natural molecules (1aa-1ar):

A 25mL Schlenk flask equipped with a stirring bar is filled with Aryl phenols (0.2 mmol, 1.0 equiv.),  $\text{Et}_3\text{N}$  (1.0 mmol, 5.0 equiv.), dioxane (1 mL). Under positive pressure of  $\text{SO}_2\text{F}_2$  gas, five evacuation/backfill cycles are performed under high vacuum to fill the reaction tube and vigorous stirring at room temperature for 6h. Then addition  $\text{Pd}(\text{OAc})_2$  (5 mol%), RuPhos (6 mol%),  $\text{K}_3\text{PO}_4$  (0.4 mmol, 2.0 equiv.), trimethylboroxine (typically, 0.1 mmol, 0.5 equiv.), dioxane (1 mL). Under a positive pressure of nitrogen and five evacuations/backfilling cycles under high vacuum. The mixture was allowed to react for 8 h at 120 °C. The reaction was quenched by water and the reaction mixture was extracted with EA for three times. The combined organic layer was washed with brine and dried over anhydrous  $\text{Na}_2\text{SO}_4$ . The solvent was removed under vacuum and the residue was purified by a flash column chromatography on silica gel using ethyl acetate and petroleum as eluent to provide the desired products.

Data File F:\Data\_VWD\CLJ\2022-07-15\15-27-15gcf-od-100-0.8.D  
Sample Name: gcf-od-100-0.8

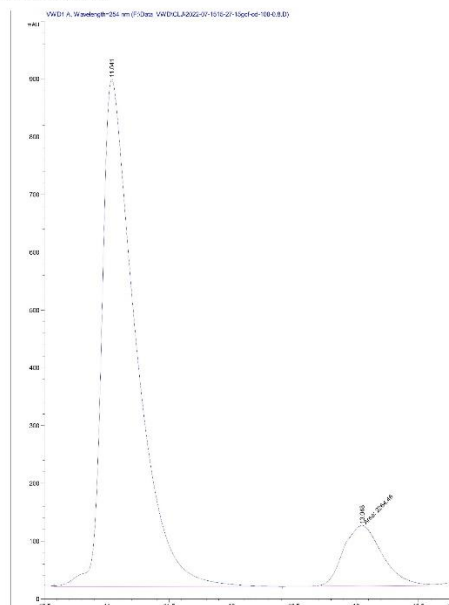

Data File F:\Data\_VWD\CLJ\2022-07-15\15-27-15gcf-od-100-0.8.D  
Sample Name: gcf-od-100-0.8

# Area Percent Report

Sorted By : Signal  
Multiplier : 1.0000  
Dilution : 1.0000  
Do not use Multiplier & Dilution Factor with ISTDs

Signal 1: VWD1 A, Wavelength=254 nm

| Peak # | RetTime [min] | Type | Width [min] | Area [mAU*s] | Height [mAU] | Area %  |
|--------|---------------|------|-------------|--------------|--------------|---------|
| 1      | 11.041        | VB   | 0.2709      | 1.65541e4    | 878.36438    | 87.9669 |
| 2      | 13.048        | MM   | 0.3602      | 2264.45557   | 104.78912    | 12.0331 |

Totals : 1.88185e4 983.15350

\*\*\* End of Report \*\*\*

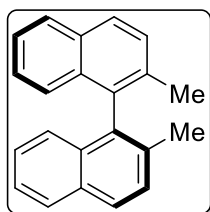

3an

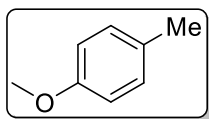

### 1-methoxy-4-methylbenzene (3a)

Reaction performed according to general procedure; purified by chromatography on silica gel (Petroleum ether : Ethyl acetate = 20 : 1). Yellow oil, 83% yield, 20.3 mg.

**<sup>1</sup>H NMR** (400 MHz, Chloroform-*d*)  $\delta$  7.11 (d,  $J$  = 8.2 Hz, 2H), 6.86 – 6.80 (m, 2H), 3.81 (s, 3H), 2.31 (s, 3H).

**<sup>13</sup>C NMR** (101 MHz, Chloroform-*d*)  $\delta$  157.45, 129.90, 129.85, 113.69, 55.30, 20.47.

**HRMS** (EI-TOF) calcd for C<sub>8</sub>H<sub>10</sub>O: 122.0732; Found: 122.0733.

NMR spectroscopic data agreed with literature values.<sup>1</sup>

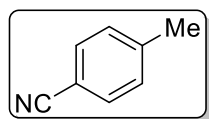

### 4-methylbenzonitrile (3b)

Reaction performed according to general procedure; purified by chromatography on silica gel (Petroleum ether : Ethyl acetate = 20 : 1). Colorless oil, 91% yield, 21.3 mg.

**<sup>1</sup>H NMR** (400 MHz, Chloroform-*d*)  $\delta$  7.56 (d,  $J$  = 8.2 Hz, 2H), 7.29 (d,  $J$  = 7.9 Hz, 2H), 2.44 (s, 3H).

**<sup>13</sup>C NMR** (101 MHz, Chloroform-*d*)  $\delta$  143.73, 132.07, 129.86, 119.20, 109.30, 21.87.

**HRMS** (EI-TOF) calcd for C<sub>8</sub>H<sub>7</sub>N: 117.0578; Found: 117.0582.

NMR spectroscopic data agreed with literature values.<sup>2</sup>

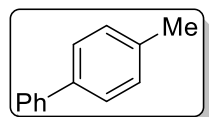

### 4-methyl-1,1'-biphenyl (3c)

Reaction performed according to general procedure; purified by chromatography on silica gel (Petroleum ether : Ethyl acetate = 20 : 1). White solid, 99% yield, 33.3 mg.

**<sup>1</sup>H NMR** (400 MHz, Chloroform-*d*)  $\delta$  7.64 (d,  $J$  = 7.6 Hz, 2H), 7.55 (d,  $J$  = 8.1 Hz, 2H), 7.48 (t,  $J$  = 7.6 Hz, 2H), 7.38 (t,  $J$  = 7.4 Hz, 1H), 7.31 (d,  $J$  = 8.0 Hz, 2H), 2.45 (s, 3H).

**<sup>13</sup>C NMR** (101 MHz, CDCl<sub>3</sub>)  $\delta$  141.20, 138.39, 137.07, 129.53, 128.76, 127.04, 127.02, 21.16.

**HRMS** (EI-TOF) calcd for C<sub>13</sub>H<sub>12</sub>: 168.0939; Found: 168.0940.

NMR spectroscopic data agreed with literature values.<sup>3</sup>

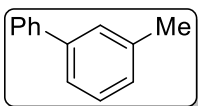

### 3-methyl-1,1'-biphenyl (3d)

Reaction performed according to general procedure; purified by chromatography on silica gel (Petroleum ether : Ethyl acetate = 20 : 1).

White oil, 99% yield, 33.3 mg.

**<sup>1</sup>H NMR** (400 MHz, Chloroform-*d*)  $\delta$  7.74 – 7.68 (m, 2H), 7.58 – 7.49 (m, 4H), 7.44 (t,  $J$  = 7.5 Hz, 2H), 7.27 (s, 1H), 2.53 (s, 3H).

**<sup>13</sup>C NMR** (101 MHz, Chloroform-*d*)  $\delta$  141.46, 141.34, 138.42, 128.81, 128.78, 128.11, 128.09, 127.29, 127.28, 124.39, 21.66.

**HRMS** (EI-TOF) calcd for C<sub>13</sub>H<sub>12</sub>: 168.0939; Found: 168.0940.

NMR spectroscopic data agreed with literature values.<sup>3</sup>

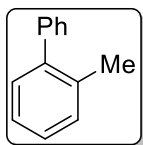

### 2-methyl-1,1'-biphenyl (3e)

Reaction performed according to general procedure; purified by chromatography on silica gel (Petroleum ether : Ethyl acetate = 20 : 1). Colorless oil, 96% yield, 32.3 mg.

**$^1\text{H}$  NMR** (400 MHz, Chloroform-*d*)  $\delta$  7.52 – 7.47 (m, 2H), 7.42 (t,  $J$  = 6.6 Hz, 3H), 7.38 – 7.29 (m, 4H), 2.36 (s, 3H).

**$^{13}\text{C}$  NMR** (101 MHz, Chloroform-*d*)  $\delta$  142.03 , 142.00 , 135.41 , 130.38 , 129.87 , 129.27 , 128.14 , 127.32 , 126.83 , 125.84 , 20.55 .

**HRMS** (EI-TOF) calcd for  $\text{C}_{13}\text{H}_{12}$ : 168.0939; Found: 168.0940.

NMR spectroscopic data agreed with literature values.<sup>3</sup>

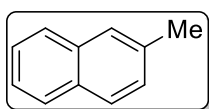

### 2-methylnaphthalene (3f)

Reaction performed according to general procedure; purified by chromatography on silica gel (Petroleum ether : Ethyl acetate = 20 : 1). White solid, 99% yield, 28.2 mg.

**$^1\text{H}$  NMR** (400 MHz, Chloroform-*d*)  $\delta$  8.07 (d,  $J$  = 8.0 Hz, 1H), 7.95 – 7.89 (m, 1H), 7.78 (d,  $J$  = 8.1 Hz, 1H), 7.58 (pd,  $J$  = 6.9, 1.4 Hz, 2H), 7.48 – 7.37 (m, 2H), 2.77 (s, 3H).

**$^{13}\text{C}$  NMR** (101 MHz,  $\text{CDCl}_3$ )  $\delta$  134.33, 133.60, 132.67, 128.59, 126.62, 126.44, 125.78, 125.64, 125.60, 124.18, 19.46.

**HRMS** (EI-TOF) calcd for  $\text{C}_{11}\text{H}_{10}$ : 142.0783; Found: 142.0788.

NMR spectroscopic data agreed with literature values.<sup>1</sup>

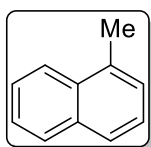

### 1-Methylnaphthalene (3g)

Reaction performed according to general procedure; purified by chromatography on silica gel (Petroleum ether : Ethyl acetate = 20 : 1). Colorless oil, 99% yield, 28.2 mg.

**$^1\text{H}$  NMR** (400 MHz, Chloroform-*d*)  $\delta$  7.83 (d,  $J$  = 7.8 Hz, 1H), 7.78 (dd,  $J$  = 8.1, 3.7 Hz, 2H), 7.65 (s, 1H), 7.46 (pd,  $J$  = 6.9, 1.4 Hz, 2H), 7.35 (dd,  $J$  = 8.4, 1.6 Hz, 1H), 2.55 (s, 3H).

**$^{13}\text{C}$  NMR** (101 MHz, Chloroform-*d*)  $\delta$  135.47 , 133.67 , 131.70 , 128.14 , 127.70 , 127.62 , 127.24 , 126.85 , 125.88 , 124.97 , 21.75.

**HRMS** (EI-TOF) calcd for  $\text{C}_{11}\text{H}_{10}$ : 142.0783; Found: 142.0783.

NMR spectroscopic data agreed with literature values.<sup>1</sup>

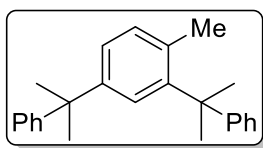

### ((4-methyl-1,3-phenylene)bis(propane-2,2-diyl))dibenzene (3h)

Reaction performed according to general procedure; purified by chromatography on silica gel (Petroleum ether : Ethyl acetate = 10 : 1). Yellow oil, 61% yield, 40.1 mg.

**<sup>1</sup>H NMR** (400 MHz, Chloroform-*d*)  $\delta$  7.55 (s, 1H), 7.40 – 7.21 (m, 10H), 7.11 (d, *J* = 7.9 Hz, 1H), 7.03 (d, *J* = 7.9 Hz, 1H), 1.83 (s, 9H), 1.69 (s, 6H).

**<sup>13</sup>C NMR** (101 MHz, Chloroform-*d*)  $\delta$  151.14, 151.07, 147.77, 146.75, 134.08, 132.04, 128.25, 128.03, 126.87, 125.94, 125.61, 125.31, 124.80, 124.72, 43.76, 42.96, 30.99, 30.82, 21.27.

**HRMS** (EI-TOF) calcd for C<sub>25</sub>H<sub>28</sub>: 328.2191; Found: 328.2198.

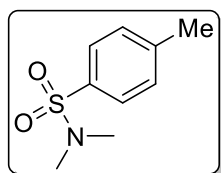

### ***N,N*, 4-trimethylbenzenesulfonamide (3i)**

Reaction performed according to general procedure; purified by chromatography on silica gel (Petroleum ether : Ethyl acetate = 10 : 1). White solid, 90% yield, 35.9 mg.

**<sup>1</sup>H NMR** (400 MHz, Chloroform-*d*)  $\delta$  7.67 (d, *J* = 8.2 Hz, 2H), 7.35 (d, *J* = 8.1 Hz, 2H), 2.70 (s, 6H), 2.45 (s, 3H).

**<sup>13</sup>C NMR** (101 MHz, Chloroform-*d*)  $\delta$  143.51, 132.38, 129.64, 127.81, 37.98, 21.54.

**HRMS** (EI-TOF) calcd for C<sub>9</sub>H<sub>13</sub>NO<sub>2</sub>S: 199.0667; Found: 199.0672.

NMR spectroscopic data agreed with literature values.<sup>4</sup>

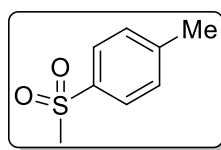

### **1-methyl-4-(methylsulfonyl)benzene (3j)**

Reaction performed according to general procedure; purified by chromatography on silica gel (Petroleum ether : Ethyl acetate = 10 : 1). White solid, 99% yield, 33.7 mg.

**<sup>1</sup>H NMR** (400 MHz, Chloroform-*d*)  $\delta$  7.82 (d, *J* = 8.3 Hz, 2H), 7.36 (d, *J* = 8.0 Hz, 2H), 3.04 (s, 3H), 2.45 (s, 3H).

**<sup>13</sup>C NMR** (101 MHz, CDCl<sub>3</sub>)  $\delta$  144.70, 137.68, 129.98, 127.36, 44.62, 21.63.

**HRMS** (EI-TOF) calcd for C<sub>8</sub>H<sub>10</sub>O<sub>2</sub>S: 170.0402; Found: 170.0405.

NMR spectroscopic data agreed with literature values.<sup>5</sup>

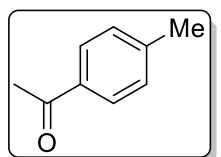

### **1-(p-tolyl)ethan-1-one (3k)**

Reaction performed according to general procedure; purified by chromatography on silica gel (Petroleum ether : Ethyl acetate = 10 : 1). Colorless oil, 99% yield, 26.5 mg.

**<sup>1</sup>H NMR** (400 MHz, Chloroform-*d*)  $\delta$  7.88 (d, *J* = 8.2 Hz, 2H), 7.28 (d, *J* = 8.0 Hz, 2H), 2.60 (s, 3H), 2.44 (s, 3H).

**<sup>13</sup>C NMR** (101 MHz, Chloroform-*d*)  $\delta$  197.93, 143.91, 134.71, 129.26, 128.46, 26.57, 21.67.

**HRMS** (EI-TOF) calcd for C<sub>9</sub>H<sub>10</sub>O: 134.0732; Found: 134.0740.

NMR spectroscopic data agreed with literature values.<sup>5</sup>

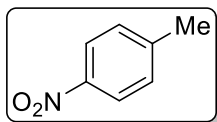

### 1-methyl-4-nitrobenzene (3l)

Reaction performed according to general procedure; purified by chromatography on silica gel (Petroleum ether : Ethyl acetate = 10 : 1). White solid, 91% yield, 25.0 mg.

**<sup>1</sup>H NMR** (400 MHz, Chloroform-*d*) δ 8.14 (d, *J* = 8.7 Hz, 2H), 7.34 (d, *J* = 8.2 Hz, 2H), 2.49 (s, 3H).

**<sup>13</sup>C NMR** (101 MHz, Chloroform-*d*) δ 145.88 , 129.77 , 123.51 , 21.57 .

**HRMS** (EI-TOF) calcd for C<sub>7</sub>H<sub>7</sub>NO<sub>2</sub>: 137.0477; Found: 137.0478.

NMR spectroscopic data agreed with literature values.<sup>6</sup>

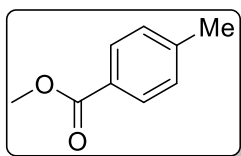

### methyl 4-methylbenzoate (3m)

Reaction performed according to general procedure; purified by chromatography on silica gel (Petroleum ether : Ethyl acetate = 10 : 1). Colorless oil, 99% yield, 29.7 mg.

**<sup>1</sup>H NMR** (400 MHz, Chloroform-*d*) δ 7.95 (d, *J* = 8.2 Hz, 2H), 7.25 (d, *J* = 8.0 Hz, 2H), 3.92 (s, 3H), 2.42 (s, 3H).

**<sup>13</sup>C NMR** (101 MHz, Chloroform-*d*) δ 167.20 , 143.57 , 129.61 , 129.09 , 127.43 , 51.96 , 21.66 .

**HRMS** (EI-TOF) calcd for C<sub>9</sub>H<sub>10</sub>O<sub>2</sub>: 150.0681; Found: 150.0683.

NMR spectroscopic data agreed with literature values.<sup>5</sup>

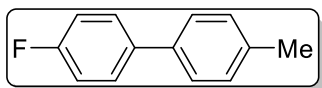

### 4-fluoro-4'-methyl-1,1'-biphenyl (3n)

Reaction performed according to general procedure; purified by chromatography on silica gel (Petroleum ether : Ethyl acetate =

20 : 1). White solid, 98% yield, 36.5 mg.

**<sup>1</sup>H NMR** (400 MHz, Chloroform-*d*) δ 7.64 – 7.57 (m, 2H), 7.52 (d, *J* = 8.1 Hz, 2H), 7.32 (d, *J* = 7.9 Hz, 2H), 7.25 – 7.13 (m, 2H), 2.48 (s, 3H).

**<sup>13</sup>C NMR** (101 MHz, Chloroform-*d*) δ 163.60 , 161.15 , 137.39 (d, *J* = 13.5 Hz), 137.10 , 129.62 , 128.53 (d, *J* = 8.0 Hz), 126.92 , 115.73 , 115.51 , 21.14 .

**<sup>19</sup>F NMR** (565 MHz, CDCl<sub>3</sub>) δ -116.22 .

**HRMS** (EI-TOF) calcd for C<sub>13</sub>H<sub>11</sub>F: 186.0845; Found: 186.0849.

NMR spectroscopic data agreed with literature values.<sup>7</sup>

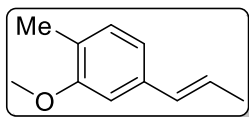

### 2-methoxy-1-methyl-4-(prop-1-en-1-yl)benzene (3o)

Reaction performed according to general procedure; purified by chromatography on silica gel (Petroleum ether : Ethyl acetate = 30 : 1). Colorless oil, 97% yield, 31.5 mg.

**<sup>1</sup>H NMR** (400 MHz, Chloroform-*d*) δ 7.11 (d, *J* = 7.5 Hz, 1H), 6.96 – 6.81 (m, 2H), 6.44 (d, *J* = 15.9 Hz, 1H), 6.35 – 6.18 (m, 1H), 3.90 (s, 3H), 2.27 (s, 3H), 1.95 (d, *J* = 6.6 Hz, 3H).

**<sup>13</sup>C NMR** (101 MHz, Chloroform-*d*) δ 157.83 , 136.99 , 131.21 , 130.63 , 125.34 , 124.79 , 118.12 , 107.26 , 55.21 , 18.49 , 16.06 .

**HRMS** (EI-TOF) calcd for C<sub>11</sub>H<sub>14</sub>O: 162.1045; Found: 162.1052.

NMR spectroscopic data agreed with literature values.<sup>8</sup>

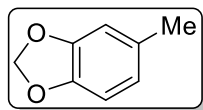

### 5-methylbenzo[d][1,3]dioxole (3p)

Reaction performed according to general procedure; purified by chromatography on silica gel (Petroleum ether : Ethyl acetate = 10 : 1). Colorless oil, 82% yield, 22.3 mg.

**<sup>1</sup>H NMR** (400 MHz, Chloroform-*d*)  $\delta$  6.78 – 6.61 (m, 3H), 5.94 (s, 2H), 2.31 (s, 3H).

**<sup>13</sup>C NMR** (101 MHz, Chloroform-*d*)  $\delta$  147.47 , 145.27 , 131.51 , 121.53 , 109.61 , 108.06 , 100.69 , 21.20 .

**HRMS** (EI-TOF) calcd for C<sub>8</sub>H<sub>8</sub>O<sub>2</sub>: 136.0524; Found: 136.0529.

NMR spectroscopic data agreed with literature values.<sup>9</sup>

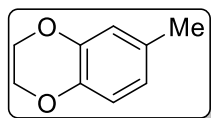

### 6-methyl-2,3-dihydrobenzo[b][1,4]dioxine (3q)

Reaction performed according to general procedure; purified by chromatography on silica gel (Petroleum ether : Ethyl acetate = 20 : 1). Colorless oil, 84% yield, 25.2 mg.

**<sup>1</sup>H NMR** (400 MHz, Chloroform-*d*)  $\delta$  6.80 (d, *J* = 8.2 Hz, 1H), 6.76 – 6.63 (m, 2H), 4.26 (s, 4H), 2.29 (s, 3H).

**<sup>13</sup>C NMR** (101 MHz, Chloroform-*d*)  $\delta$  143.21 , 141.32 , 131.09 , 121.97 , 117.66 , 116.93 , 64.45 , 64.34 , 20.69 .

**HRMS** (EI-TOF) calcd for C<sub>9</sub>H<sub>10</sub>O<sub>2</sub>: 150.0681; Found: 150.0681.

NMR spectroscopic data agreed with literature values.<sup>8</sup>

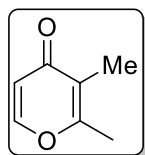

### 2,3-dimethyl-4H-pyran-4-one (3r)

Reaction performed according to general procedure; purified by chromatography on silica gel (Petroleum ether : Ethyl acetate = 1 : 1). Yellow solid, 83% yield, 20.3 mg.

**<sup>1</sup>H NMR** (400 MHz, Chloroform-*d*)  $\delta$  7.68 (d, *J* = 5.6 Hz, 1H), 6.33 (d, *J* = 5.6 Hz, 1H), 2.32 (s, 3H), 1.98 (s, 3H).

**<sup>13</sup>C NMR** (101 MHz, Chloroform-*d*)  $\delta$  178.91 , 162.02 , 154.19 , 122.51 , 115.11 , 17.78 , 9.90 .

**HRMS** (EI-TOF) calcd for C<sub>7</sub>H<sub>8</sub>O<sub>2</sub>: 124.0524; Found: 124.0532.

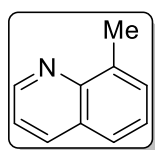

### 8-methylquinoline (3s)

Reaction performed according to general procedure; purified by chromatography on silica gel (Petroleum ether : Ethyl acetate = 10 : 1). Yellow oil, 45% yield, 12.9 mg.

**<sup>1</sup>H NMR** (400 MHz, Chloroform-*d*)  $\delta$  8.98 (dd, *J* = 4.2, 1.7 Hz, 1H), 8.16 (dd, *J* = 8.2, 1.7 Hz, 1H), 7.69 (d, *J* = 8.2 Hz, 1H), 7.59 (d, *J* = 6.9 Hz, 1H), 7.50 – 7.40 (m, 2H), 2.85 (s, 3H).

**$^{13}\text{C}$  NMR** (101 MHz, Chloroform-*d*)  $\delta$  149.25 , 147.29 , 137.05 , 136.44 , 129.71 , 128.30 , 126.36 , 125.91 , 120.87 , 18.21 .

**HRMS** (EI-TOF) calcd for  $\text{C}_{10}\text{H}_9\text{N}$ : 143.0735; Found: 143.0745.

NMR spectroscopic data agreed with literature values.<sup>10</sup>

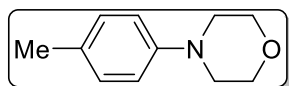

#### 4-(p-tolyl)morpholine (3t)

Reaction performed according to general procedure; purified by chromatography on silica gel (Petroleum ether : Ethyl acetate =

10 : 1). Colorless oil, 97% yield, 34.4 mg.

**$^1\text{H}$  NMR** (400 MHz, Chloroform-*d*)  $\delta$  7.22 (t,  $J$  = 7.8 Hz, 1H), 6.83 – 6.73 (m, 3H), 3.93 – 3.88 (m, 4H), 3.21 – 3.16 (m, 4H), 2.37 (s, 3H).

**$^{13}\text{C}$  NMR** (101 MHz, Chloroform-*d*)  $\delta$  151.29 , 138.95 , 129.08 , 121.12 , 116.65 , 112.97 , 66.98 , 49.56 , 21.83 .

**HRMS** (EI-TOF) calcd for  $\text{C}_{11}\text{H}_{15}\text{NO}$ : 177.1154; Found: 177.1160.

NMR spectroscopic data agreed with literature values.<sup>11</sup>

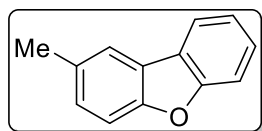

#### 2-methyldibenzo[b,d]furan (3u)

Reaction performed according to general procedure; purified by chromatography on silica gel (Petroleum ether : Ethyl acetate = 20 : 1). White solid, 99% yield, 36.1 mg.

**$^1\text{H}$  NMR** (400 MHz, Chloroform-*d*)  $\delta$  7.98 (d,  $J$  = 8.3 Hz, 1H), 7.80 (s, 1H), 7.64 (d,  $J$  = 8.2 Hz, 1H), 7.57 – 7.47 (m, 2H), 7.40 (t,  $J$  = 7.0 Hz, 1H), 7.33 (d,  $J$  = 8.4 Hz, 1H), 2.58 (s, 3H).

**$^{13}\text{C}$  NMR** (101 MHz, Chloroform-*d*)  $\delta$  156.54 , 154.61 , 132.23 , 128.29 , 127.00 , 124.33 , 124.26 , 122.59 , 120.71 , 120.62 , 111.71 , 111.21 , 21.42 .

**HRMS** (EI-TOF) calcd for  $\text{C}_{13}\text{H}_{10}\text{O}$ : 182.0732; Found: 182.0740.

NMR spectroscopic data agreed with literature values.<sup>12</sup>

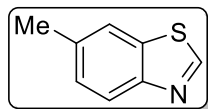

#### 6-methylbenzo[d]thiazole (3v)

Reaction performed according to general procedure; purified by chromatography on silica gel (Petroleum ether : Ethyl acetate = 10 : 1).

Yellow oil, 99% yield, 29.5 mg.

**$^1\text{H}$  NMR** (400 MHz, Chloroform-*d*)  $\delta$  8.92 (s, 1H), 8.04 (d,  $J$  = 8.4 Hz, 1H), 7.75 (s, 1H), 7.34 (d,  $J$  = 8.4 Hz, 1H), 2.52 (s, 3H).

**$^{13}\text{C}$  NMR** (101 MHz, Chloroform-*d*)  $\delta$  152.92 , 151.36 , 135.74 , 133.88 , 127.87 , 123.05 , 121.56 , 21.54 .

**HRMS** (EI-TOF) calcd for  $\text{C}_8\text{H}_7\text{NS}$ : 149.0299; Found: 149.0305.

NMR spectroscopic data agreed with literature values.<sup>13</sup>

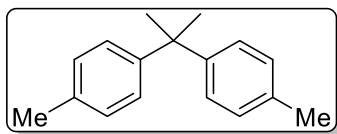

#### 4,4'-(propane-2,2-diyl)bis(methylbenzene) (3w)

Reaction performed according to general procedure; TMB (0.1 mmol instead of 0.5 mmol); purified by chromatography on silica gel (Petroleum ether : Ethyl acetate = 20 : 1).

Colorless oil, 75% yield, 33.7 mg.

$^1\text{H NMR}$  (400 MHz, Chloroform-*d*)  $\delta$  7.31 – 7.16 (m, 8H), 2.44 (s, 6H), 1.79 (s, 6H).

$^{13}\text{C NMR}$  (101 MHz, Chloroform-*d*)  $\delta$  148.02, 135.06, 128.80, 126.78, 42.35, 30.97, 21.03.

**HRMS** (EI-TOF) calcd for  $\text{C}_{17}\text{H}_{20}$ : 224.1565; Found: 224.1571.

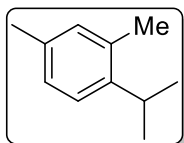

#### 1-isopropyl-2,4-dimethylbenzene (3aa)

Reaction performed according to general procedure; purified by chromatography on silica gel (Petroleum ether : Ethyl acetate = 20 : 1).

Colorless oil, 84% yield, 17.8 mg.

$^1\text{H NMR}$  (400 MHz, Chloroform-*d*)  $\delta$  7.17 (d,  $J$  = 7.8 Hz, 1H), 7.08 – 6.94 (m, 2H), 3.19 – 3.06 (m, 1H), 2.32 (d,  $J$  = 8.1 Hz, 6H), 1.24 (d,  $J$  = 6.9 Hz, 6H).

$^{13}\text{C NMR}$  (101 MHz, Chloroform-*d*)  $\delta$  134.88, 131.03, 126.83, 124.65, 28.90, 23.34, 20.87, 19.24.

**HRMS** (EI-TOF) calcd for  $\text{C}_{11}\text{H}_{16}$ : 148.1252; Found: 148.1255.

NMR spectroscopic data agreed with literature values.<sup>14</sup>

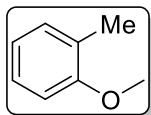

#### 1-methoxy-2-methylbenzene (3ab)

Reaction performed according to general procedure; purified by chromatography on silica gel (Petroleum ether : Ethyl acetate = 20 : 1).

Colorless oil, 93% yield, 22.7 mg.

$^1\text{H NMR}$  (400 MHz, Chloroform-*d*)  $\delta$  7.26 – 7.16 (m, 2H), 6.96 – 6.86 (m, 2H), 3.88 (s, 3H), 2.29 (s, 3H).

$^{13}\text{C NMR}$  (101 MHz, Chloroform-*d*)  $\delta$  157.75, 130.64, 126.83, 126.62, 120.29, 109.91, 55.25, 16.26.

**HRMS** (EI-TOF) calcd for  $\text{C}_8\text{H}_{10}\text{O}$ : 122.0732; Found: 122.0733.

NMR spectroscopic data agreed with literature values.<sup>5</sup>

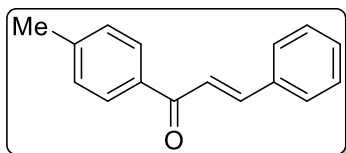

#### 3-phenyl-1-(p-tolyl)prop-2-en-1-one (3ac)

Reaction performed according to general procedure; purified by chromatography on silica gel (Petroleum ether : Ethyl acetate = 10 : 1). Colorless oil, 96% yield, 42.7 mg.

$^1\text{H NMR}$  (400 MHz, Chloroform-*d*)  $\delta$  7.98 (d,  $J$  = 8.2 Hz, 2H), 7.84 (d,  $J$  = 15.7 Hz, 1H), 7.66 (dd,  $J$  = 6.5, 3.0 Hz, 2H), 7.57 (d,  $J$  = 15.7 Hz, 1H), 7.43 (dd,  $J$  = 5.0, 1.8 Hz, 3H), 7.32 (d,  $J$  = 8.0 Hz, 2H), 2.45 (s, 3H).

$^{13}\text{C NMR}$  (101 MHz, Chloroform-*d*)  $\delta$  189.99, 144.41, 143.70, 135.64, 135.01, 130.49, 129.39, 128.98, 128.71, 128.47, 122.06, 21.73.

**HRMS** (EI-TOF) calcd for  $C_{16}H_{14}O$ : 222.1045; Found: 222.1056.

NMR spectroscopic data agreed with literature values.<sup>15</sup>

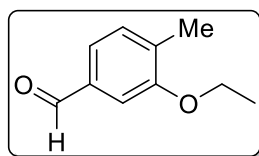

### 3-ethoxy-4-methylbenzaldehyde (3ad)

Reaction performed according to general procedure; purified by chromatography on silica gel (Petroleum ether : Ethyl acetate = 30 : 1). Colorless oil, 98% yield, 32.2 mg.

**<sup>1</sup>H NMR** (400 MHz, Chloroform-*d*)  $\delta$  9.93 (s, 1H), 7.40 – 7.27 (m, 3H), 4.12 (q,  $J$  = 7.0 Hz, 2H), 2.31 (s, 3H), 1.47 (t,  $J$  = 7.0 Hz, 3H).

**<sup>13</sup>C NMR** (101 MHz, Chloroform-*d*)  $\delta$  192.13 , 157.67 , 135.78 , 135.02 , 130.84 , 124.25 , 108.76 , 63.69 , 16.90 , 14.76 .

**HRMS** (EI-TOF) calcd for  $C_{10}H_{12}O_2$ : 164.0837; Found: 164.0840.

NMR spectroscopic data agreed with literature values.<sup>16</sup>

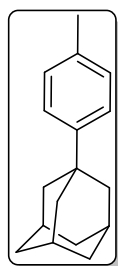

### 1-(p-tolyl)adamantane (3ae)

Reaction performed according to general procedure; purified by chromatography on silica gel (Petroleum ether : Ethyl acetate = 20 : 1). White solid, 95% yield, 43.0 mg.

**<sup>1</sup>H NMR** (400 MHz, Chloroform-*d*)  $\delta$  7.38 (d,  $J$  = 8.2 Hz, 2H), 7.25 (d,  $J$  = 8.1 Hz, 2H), 2.44 (s, 3H), 2.21 (s, 3H), 2.03 (d,  $J$  = 2.7 Hz, 6H), 1.93 – 1.84 (m, 6H).

**<sup>13</sup>C NMR** (101 MHz, Chloroform-*d*)  $\delta$  148.55 , 134.99 , 128.92 , 124.83 , 43.38 , 36.95 , 35.93 , 29.11 , 21.00 .

**HRMS** (EI-TOF) calcd for  $C_{17}H_{22}$ : 226.1722; Found: 226.1726.

NMR spectroscopic data agreed with literature values.<sup>17</sup>

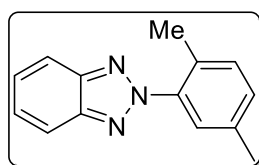

### 2-(2,5-dimethylphenyl)-2H-benzo[d][1,2,3]triazole (3af)

Reaction performed according to general procedure; purified by chromatography on silica gel (Petroleum ether : Ethyl acetate = 20 : 1). White solid, 72% yield, 32.2 mg.

**<sup>1</sup>H NMR** (400 MHz, Chloroform-*d*)  $\delta$  7.99 (dd,  $J$  = 6.6, 3.1 Hz, 2H), 7.56 (s, 1H), 7.47 (dd,  $J$  = 6.6, 3.1 Hz, 2H), 7.30 (d,  $J$  = 7.8 Hz, 1H), 7.25 (d,  $J$  = 7.9 Hz, 1H), 2.42 (d,  $J$  = 11.5 Hz, 6H).

**<sup>13</sup>C NMR** (101 MHz, Chloroform-*d*)  $\delta$  144.70 , 140.00 , 136.63 , 131.59 , 130.36 , 130.10 , 126.84 , 126.45 , 118.40 , 20.81 , 18.42 .

**HRMS** (EI-TOF) calcd for  $C_{14}H_{13}N_3$ : 223.1109; Found: 223.1114.

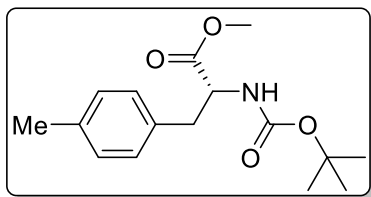

**methyl (*R*)-2-((tert-butoxycarbonyl)amino)-3-(p-tolyl)propanoate (3ag)**

Reaction performed according to general procedure; stirring at room temperature under  $\text{SO}_2\text{F}_2$  atmosphere for 2h instead of 6h; purified by chromatography on silica gel (Petroleum ether : Ethyl acetate = 10 : 1). White solid, 55% yield, 32.3 mg.

**$^1\text{H}$  NMR** (400 MHz, Chloroform-*d*)  $\delta$  7.11 (d,  $J$  = 7.8 Hz, 2H), 7.02 (d,  $J$  = 7.7 Hz, 2H), 5.02 (s, 1H), 4.58 (s, 1H), 3.72 (s, 3H), 3.06 (dd,  $J$  = 12.3, 5.8 Hz, 2H), 2.33 (s, 3H), 1.44 (s, 9H).

**$^{13}\text{C}$  NMR** (101 MHz, Chloroform-*d*)  $\delta$  172.44, 155.14, 136.56, 132.86, 129.16, 79.83, 67.07, 54.49, 52.16, 37.84, 28.30, 21.06.

**HRMS** (EI-TOF) calcd for  $\text{C}_{16}\text{H}_{23}\text{NO}_4$ : 293.1627; Found: 293.1699.

NMR spectroscopic data agreed with literature values.<sup>18</sup>

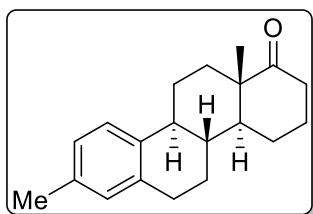

**(4*aS*,4*bR*,10*bS*,12*aS*)-8,12*a*-dimethyl-3,4,4*a*,4*b*,5,6,10*b*,11,12,12*a*-decahydrochrysen-1(2*H*)-one (3ah)**

Reaction performed according to general procedure; purified by chromatography on silica gel (Petroleum ether : Ethyl acetate = 5 : 1). White solid, 81% yield, 45.8 mg.

**$^1\text{H}$  NMR** (400 MHz, Chloroform-*d*)  $\delta$  7.24 (d,  $J$  = 7.9 Hz, 1H), 7.02 (d,  $J$  = 8.0 Hz, 1H), 6.98 (s, 1H), 2.98 – 2.88 (m, 2H), 2.58 – 2.42 (m, 2H), 2.34 (s, 3H), 2.29 (s, 1H), 2.24 – 2.15 (m, 1H), 2.15 – 1.90 (m, 4H), 1.75 – 1.34 (m, 7H), 0.95 (s, 3H).

**$^{13}\text{C}$  NMR** (101 MHz, Chloroform-*d*)  $\delta$  136.75, 136.32, 135.33, 129.76, 126.59, 125.31, 50.51, 48.06, 44.28, 38.32, 35.92, 31.64, 29.38, 26.61, 25.83, 21.63, 20.89, 13.88.

**HRMS** (EI-TOF) calcd for  $\text{C}_{20}\text{H}_{26}\text{O}$ : 282.1984; Found: 282.2056.

NMR spectroscopic data agreed with literature values.<sup>8</sup>

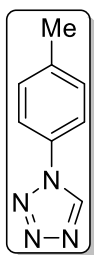

**1-(p-tolyl)-1*H*-tetrazole (3ai)**

Reaction performed according to general procedure; purified by chromatography on silica gel (Petroleum ether : Ethyl acetate = 3 : 1). Pink solid, 67% yield, 21.5 mg.

**$^1\text{H}$  NMR** (400 MHz, Chloroform-*d*)  $\delta$  8.99 (s, 1H), 7.60 (d,  $J$  = 8.5 Hz, 2H), 7.40 (d,  $J$  = 8.1 Hz, 2H), 2.47 (s, 3H).

**$^{13}\text{C}$  NMR** (101 MHz, Chloroform-*d*)  $\delta$  140.49 (d,  $J$  = 5.7 Hz), 131.47, 130.70, 121.14, 21.22.

**HRMS** (EI-TOF) calcd for  $\text{C}_8\text{H}_8\text{N}_4$ : 160.0749; Found: 160.0755.

NMR spectroscopic data agreed with literature values.<sup>19</sup>

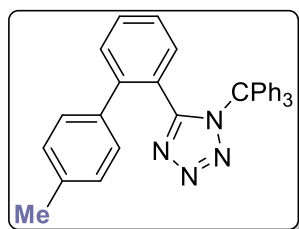

### 5-(4'-methyl-[1,1'-biphenyl]-2-yl)-1-trityl-1H-tetrazole (3aj)

Reaction performed according to general procedure; purified by chromatography on silica gel (Petroleum ether : Ethyl acetate = 10 : 1). Wheat solid, 84% yield, 80.4 mg.

<sup>1</sup>H NMR (400 MHz, Chloroform-*d*) δ 8.04 (d, *J* = 7.5 Hz, 1H), 7.59 – 7.49 (m, 3H), 7.45 – 7.40 (m, 3H), 7.36 (t, *J* = 7.7 Hz, 6H), 7.15 (d, *J* = 7.9 Hz, 2H), 7.06 (d, *J* = 7.9 Hz, 8H), 2.40 (s, 3H).

<sup>13</sup>C NMR (101 MHz, Chloroform-*d*) δ 164.34, 142.42, 141.41, 138.31, 136.46, 130.82, 130.39 (d, *J* = 3.8 Hz), 130.03, 129.24, 128.75, 128.32, 127.73, 127.40, 126.57, 83.00, 21.34.

HRMS (EI-TOF) calcd for C<sub>33</sub>H<sub>26</sub>N<sub>4</sub>: 478.2157; Found: 478.2214.

NMR spectroscopic data agreed with literature values.<sup>20</sup>

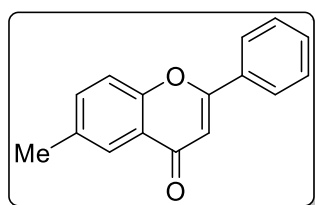

### 6-methyl-2-phenyl-4H-chromen-4-one (3ak)

Reaction performed according to general procedure; purified by chromatography on silica gel (Petroleum ether : Ethyl acetate = 5 : 1). Wheat solid, 91% yield, 43.0 mg.

<sup>1</sup>H NMR (400 MHz, Chloroform-*d*) δ 8.05 (s, 1H), 8.00 – 7.91 (m, 2H), 7.65 – 7.45 (m, 5H), 6.85 (s, 1H), 2.50 (s, 3H).

<sup>13</sup>C NMR (101 MHz, Chloroform-*d*) δ 178.63, 163.36, 154.59, 135.27, 135.05, 131.93, 131.55, 129.05, 126.31, 125.08, 123.61, 117.87, 107.45, 20.97.

HRMS (EI-TOF) calcd for C<sub>16</sub>H<sub>12</sub>O<sub>2</sub>: 236.0837; Found: 236.0840.

NMR spectroscopic data agreed with literature values.<sup>21</sup>

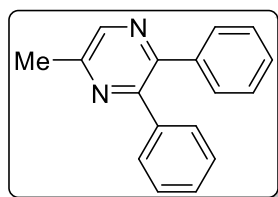

### 5-methyl-2,3-diphenylpyrazine (3al)

Reaction performed according to general procedure; purified by chromatography on silica gel (Petroleum ether : Ethyl acetate = 10 : 1). Yellow solid, 82% yield, 40.4 mg.

<sup>1</sup>H NMR (400 MHz, Chloroform-*d*) δ 8.51 (s, 1H), 7.46 (ddt, *J* = 7.6, 4.6, 2.5 Hz, 4H), 7.31 (td, *J* = 5.3, 4.8, 1.9 Hz, 6H), 2.68 (s, 3H).

<sup>13</sup>C NMR (101 MHz, Chloroform-*d*) δ 151.62, 151.22, 149.76, 141.91, 138.79 (d, *J* = 13.2 Hz), 129.68 (d, *J* = 7.8 Hz), 128.62 – 128.14 (m), 21.40.

HRMS (EI-TOF) calcd for C<sub>17</sub>H<sub>14</sub>O<sub>2</sub>: 246.1157; Found: 246.1206.

NMR spectroscopic data agreed with literature values.<sup>22</sup>

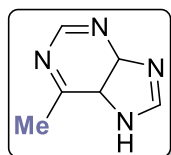

### 6-methyl-4,5-dihydro-7H-purine (3am)

Reaction performed according to general procedure; stirring at room temperature under SO<sub>2</sub>F<sub>2</sub> atmosphere for 2h instead of 6h; purified by

chromatography on silica gel (Petroleum ether : Ethyl acetate = 1 : 1). Wheat solid, 74% yield, 20.2 mg.

**<sup>1</sup>H NMR** (400 MHz, DMSO-*d*<sub>6</sub>) δ 13.39 (s, 1H), 8.74 (s, 1H), 8.51 (s, 1H), 3.40 (s, 1H), 2.70 (s, 3H).

**HRMS** (EI-TOF) calcd for C<sub>6</sub>H<sub>8</sub>N<sub>4</sub>: 136.0749; Found: 136.0795.

NMR spectroscopic data agreed with literature values.<sup>23</sup>

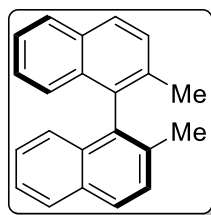

### 2,2'-dimethyl-1,1'-binaphthalene (3an)

Reaction performed according to general procedure; TMB (0.1 mmol instead of 0.5 mmol); purified by chromatography on silica gel (Petroleum ether : Ethyl acetate = 10 : 1). Colorless oil, 67% yield, 37.8 mg.

**<sup>1</sup>H NMR** (400 MHz, Chloroform-*d*) δ 8.01 – 7.96 (m, 4H), 7.61 (d, *J* = 8.4 Hz, 2H), 7.49 (t, *J* = 7.4 Hz, 2H), 7.29 (d, *J* = 6.5 Hz, 2H), 7.18 (d, *J* = 8.5 Hz, 2H), 2.15 (s, 6H).

**<sup>13</sup>C NMR** (101 MHz, Chloroform-*d*) δ 135.24 , 134.39 , 132.87 , 132.33 , 128.85 , 128.06 , 127.56 , 126.22 , 125.75 , 125.02 , 20.17 .

**HRMS** (EI-TOF) calcd for C<sub>22</sub>H<sub>18</sub>: 282.1409; Found: 282.1469.

NMR spectroscopic data agreed with literature values.<sup>24</sup>

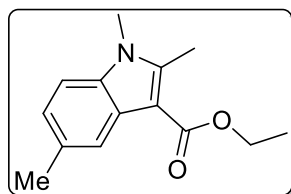

### ethyl 1,2,5-trimethyl-1H-indole-3-carboxylate (3ao)

Reaction performed according to general procedure; purified by chromatography on silica gel (Petroleum ether : Ethyl acetate = 10 : 1). Yellow solid, 82% yield, 37.9 mg.

**<sup>1</sup>H NMR** (400 MHz, Chloroform-*d*) δ 7.98 (s, 1H), 7.14 (d, *J* = 8.3 Hz, 1H), 7.07 (d, *J* = 8.3 Hz, 1H), 4.45 (q, *J* = 7.1 Hz, 2H), 3.56 (s, 3H), 2.71 (s, 3H), 2.54 (s, 3H), 1.51 (t, *J* = 7.1 Hz, 3H).

**<sup>13</sup>C NMR** (101 MHz, Chloroform-*d*) δ 166.27 , 145.14 , 134.91 , 130.91 , 126.87 , 123.36 , 121.20 , 108.72 , 103.34 , 59.30 , 29.45 , 21.70 , 14.72 , 11.85 .

**HRMS** (EI-TOF) calcd for C<sub>14</sub>H<sub>17</sub>NO<sub>2</sub>: 231.1259; Found: 232.1332.

NMR spectroscopic data agreed with literature values.<sup>25</sup>

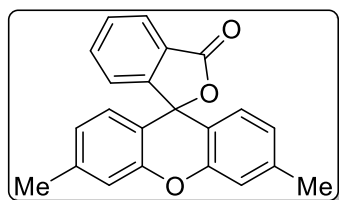

### 3',6'-dimethyl-3H-spiro[isobenzofuran-1,9'-xanthen]-3-one (3ap)

Reaction performed according to general procedure; TMB (0.1 mmol instead of 0.5 mmol); purified by chromatography on silica gel (Petroleum ether : Ethyl acetate = 10 : 1). Yellow solid, 90% yield, 59.1 mg.

**<sup>1</sup>H NMR** (400 MHz, Chloroform-*d*) δ 8.05 (d, *J* = 7.0 Hz, 1H), 7.65 (dt, *J* = 15.2, 7.0 Hz, 2H), 7.16 (d, *J* = 7.2 Hz, 1H), 7.12 (s, 2H), 6.86 (d, *J* = 7.5 Hz, 2H), 6.72 (d, *J* = 8.1 Hz, 2H), 2.40 (s, 6H).

**<sup>13</sup>C NMR** (101 MHz, Chloroform-*d*)  $\delta$  169.60 , 153.64 , 151.17 , 141.18 , 135.01 , 129.64 , 127.77 , 126.44 , 125.05 , 124.76 , 123.86 , 117.28 , 116.01 , 21.31 .

**HRMS** (EI-TOF) calcd for C<sub>22</sub>H<sub>16</sub>O<sub>3</sub>: 328.3670; Found: 328.2170.

NMR spectroscopic data agreed with literature values.<sup>26</sup>

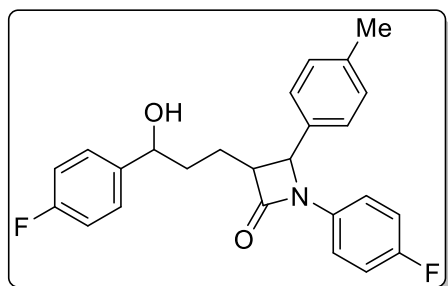

**1-(4-fluorophenyl)-3-(3-(4-fluorophenyl)-3-hydroxypropyl)-4-(p-tolyl)azetidin-2-one (3aq)**

Reaction performed according to general procedure; stirring at room temperature under SO<sub>2</sub>F<sub>2</sub> atmosphere for 1h instead of 6h; TMB (0.1 mmol instead of 0.5 mmol); purified by chromatography on silica gel (Petroleum ether : Ethyl acetate = 3 : 1). Colorless

oil, 75% yield, 61.1 mg.

**<sup>1</sup>H NMR** (400 MHz, Chloroform-*d*)  $\delta$  7.29 (dd, *J* = 8.6, 5.5 Hz, 2H), 7.26 – 7.16 (m, 6H), 7.04 – 6.96 (m, 2H), 6.92 (t, *J* = 8.7 Hz, 2H), 4.70 (t, *J* = 5.9 Hz, 1H), 4.61 (d, *J* = 2.2 Hz, 1H), 3.10 – 3.05 (m, 1H), 2.36 (s, 3H), 1.94 (dd, *J* = 20.3, 6.7 Hz, 4H).

**<sup>13</sup>C NMR** (101 MHz, Chloroform-*d*)  $\delta$  171.30 , 167.77 , 163.34 , 160.90 , 160.20 , 157.78 , 140.27 , 138.54 , 134.46 , 133.89 (d, *J* = 2.5 Hz), 129.94 , 127.38 , 125.83 , 118.43 (d, *J* = 7.8 Hz), 115.91 , 115.69 , 115.36 , 115.14 , 72.94 , 61.31 , 60.46 , 60.29 , 36.64 , 25.03 , 21.16 , 21.02 , 14.18 .

**<sup>19</sup>F NMR** (377 MHz, Chloroform-*d*)  $\delta$  -115.08 , -117.96 .

**HRMS** (EI-TOF) calcd for C<sub>25</sub>H<sub>25</sub>F<sub>2</sub>NO<sub>2</sub>: 407.1697; Found: 407.1801.

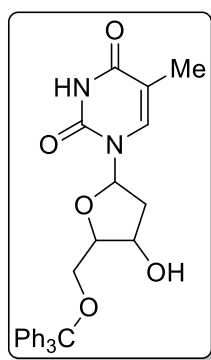

**1-(4-hydroxy-5-((trityloxy)methyl)tetrahydrofuran-2-yl)-5-methylpyrimidine-2,4(1H,3H)-dione (3ar)**

Reaction performed according to general procedure; stirring at room temperature under SO<sub>2</sub>F<sub>2</sub> atmosphere for 1h instead of 6h; purified by chromatography on silica gel (Ethyl acetate). Wheat solid, 46% yield, 44.6 mg.

**<sup>1</sup>H NMR** (400 MHz, Chloroform-*d*)  $\delta$  11.36 (s, 1H), 7.52 (s, 1H), 7.41 (d, *J* = 7.5 Hz, 6H), 7.34 (t, *J* = 7.6 Hz, 6H), 7.26 (t, *J* = 7.1 Hz, 3H), 6.25 (t, *J* = 6.8 Hz, 1H), 5.37 (d, *J* = 4.4 Hz, 1H), 4.43 – 4.32 (m, 1H),

3.92 (d, *J* = 3.4 Hz, 1H), 3.31 – 3.17 (m, 2H), 2.34 – 2.12 (m, 2H), 1.48 (s, 3H).

**<sup>13</sup>C NMR** (101 MHz, Chloroform-*d*)  $\delta$  163.72 , 150.43 , 143.52 , 135.71 , 128.30 , 128.00 , 127.19 , 109.64 , 86.45 , 85.45 , 83.81 , 70.52 , 64.02 , 54.91 , 11.81 .

**HRMS** (EI-TOF) calcd for C<sub>29</sub>H<sub>28</sub>N<sub>2</sub>O<sub>5</sub>: 484.1998; Found: 484.2053.

## reference

1. D. Heijnen, F. Tosi, C. Vila, M. C. Stuart, P. H. Elsinga, W. Szymanski and B. L. Feringa, *Angew Chem., Int. Ed.*, 2017, **56**, 3354-3359.
2. S. Lin, B. Lin, Z. Zhang, J. Chen, Y. Luo and Y. Xia, *Org. Lett.*, 2022, **24**, 3302-3306.
3. G. F. Zhang, C. F. Guan, Y. Y. Zhao, H. H. Miao and C. R. Ding, *New. J. Chem.*, 2022, **46**, 3560-3564.
4. W. Erb, M. Wen, T. Roisnel and F. Mongin, *Synthesis-Stuttgart*, 2021, **53**, 2612-2620.
5. B. Feng, G. Zhang, X. Feng and Y. Chen, *Org. Chem. Front.*, 2022, **9**, 1085-1089.
6. J. J. Gui, X. Cai, L. Y. Chen, Y. X. Zhou, W. J. Zhu, Y. R. Jiang, M. Hu, X. B. Chen, Y. W. Hu and S. L. Zhang, *Org. Chem. Front.*, 2021, **8**, 4685-4692.
7. P. Wessig and S. Krebs, *Eur. J. Org. Chem.*, 2021, **2021**, 6367-6374.
8. J. W. Wang, J. H. Zhao and H. G. Gong, *Chem. Commun.*, 2017, **53**, 10180-10183.
9. A. Tuley, Y. S. Wang, X. Q. Fang, Y. Kurra, Y. H. Rezenom and W. R. Liu, *Chem. Commun.*, 2014, **50**, 2673-2675.
10. Y. Cao, Y. Wu, Y. T. Zhang, J. Zhou, W. Xiao and D. Gu, *Chemcatchem*, 2021, **13**, 3679-3686.
11. K. Chen, Q. K. Kang, Y. T. Li, W. Q. Wu, H. Zhu and H. Shi, *J. Am. Chem. Soc.*, 2022, **144**, 1144-1151.
12. M. A. Iqbal, L. Lu, H. Mehmood and R. M. Hua, *Acs. Omega*, 2021, **6**, 15981-15987.
13. Y. Q. Guo, F. Chen, C. L. Deng and X. G. Zhang, *Chem. Commun.*, 2021, **57**, 1923-1926.
14. A. S. Frolov, E. A. Kurganova, G. N. Koshel and V. N. Sapunov, *Chim. Oggi*, 2015, **33**, 49-56.
15. P. Biswal, S. Samser, S. K. Meher, V. Chandrasekhar and K. Venkatasubbaiah, *Adv. Synth. Catal.*, 2022, **364**, 413-419.
16. PCT Int. Appl., 2008019967, 21 Feb 2008.
17. Z. I. Dehimat, A. Pasahan, D. Tebbani, S. Yasar and I. Ozdemir, *Tetrahedron*, 2017, **73**, 5940-5945.
18. P. Szczesniak and S. Stecko, *Rsc. Adv.*, 2015, **5**, 30882-30888.
19. B. Mahmoudi, A. Rostami, M. Kazemnejadi and B. A. Hamah-Ameen, *Mol. Catal.*, 2021, **499**.
20. C. Behloul, K. Bouchelouche, Y. Hadji, S. Benseghir, D. Guijarro, C. Najera and M. Yus, *Synthesis-Stuttgart*, 2016, **48**, 2455-2460.
21. X. D. Fan, C. Y. He, M. M. Ji, X. H. Sun, H. Luo, C. Li, H. X. Tong, W. Y. Zhang, Z. Z. Sun and W. Y. Chu, *Chem. Commun.*, 2022, **58**, 6348-6351.
22. Y. J. Cheong, S. Lee, S. J. Hwang, W. Yoon, H. Yun and H. Y. Jang, *Eur. J. Org. Chem.*, 2019, **2019**, 1940-1943.
23. A. E. A. Hassan, R. A. I. Abou-elkair, J. A. Montgomery and J. A. Secrist, *Nucleosides, Nucleotides and Nucleic Acids*, 2000, **19**, 1123-1134.
24. K. Fujii, H. Todani, S. Ito and K. Mikami, *Org. Lett.*, 2019, **21**, 3387-3391.
25. D. Sole and O. Serrano, *J. Org. Chem.*, 2008, **73**, 2476-2479.
26. N. H. Jadhav, D. R. Shinde, S. S. Sakate, N. K. Rasal and R. A. Pawar, *Catal. Commun.*, 2019, **120**, 17-22.

#### 4: Gram-Scale Reaction

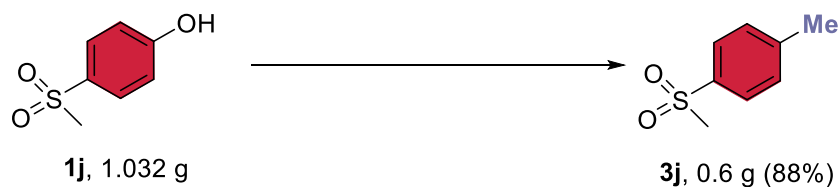

A 250mL Schlenk flask equipped with a stirring bar is filled with 4-(methylsulfonyl)phenol **1j** (4.0 mmol, 1.0 equiv.), Et<sub>3</sub>N (20.0 mmol, 5.0 equiv.), dioxane (20 mL). Under positive pressure of SO<sub>2</sub>F<sub>2</sub> gas, five evacuation/backfill cycles are performed under high vacuum to fill the reaction tube and vigorous stirring at room temperature for 12h. Then addition Pd(OAc)<sub>2</sub> (5 mol%), RuPhos (6 mol%), K<sub>3</sub>PO<sub>4</sub> (8.0 mmol, 2.0 equiv.), trimethylboroxine (2.0 mmol, 0.5 equiv.), dioxane (20 mL). Under a positive pressure of nitrogen and five evacuations/backfilling cycles under high vacuum. The mixture was allowed to react for 8 h at 120 °C. The reaction was quenched by water and the reaction mixture was extracted with EA for three times. The combined organic layer was washed with brine and dried over anhydrous Na<sub>2</sub>SO<sub>4</sub>. The solvent was removed under vacuum and the residue was purified by a flash column chromatography on silica gel using ethyl acetate and petroleum (PE:EA=10:1) as eluent to provide the desired product **3j**. 0.6g, 88% yield.

## 5: Experiments for parts per million (ppm) level catalysts

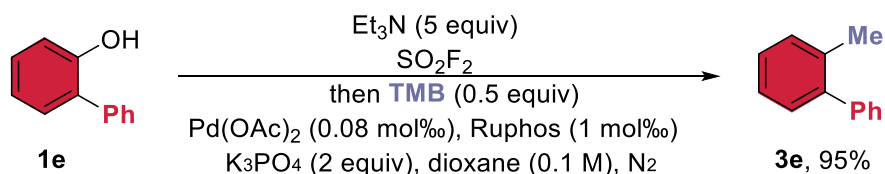

A 25mL Schlenk flask equipped with a stirring bar is filled with [1,1'-biphenyl]-2-ol **1e** (0.2 mmol, 1.0 equiv.), Et<sub>3</sub>N (1.0 mmol, 5.0 equiv.), dioxane (1 mL). Under positive pressure of SO<sub>2</sub>F<sub>2</sub> gas, five evacuation/backfill cycles are performed under high vacuum to fill the reaction tube and vigorous stirring at room temperature for 2h. Then addition Pd(OAc)<sub>2</sub> (0.08 mol%), RuPhos (1 mol%), K<sub>3</sub>PO<sub>4</sub> (0.4 mmol, 2.0 equiv.), trimethylboroxine (0.1 mmol, 0.5 equiv.), dioxane (1 mL). Under a positive pressure of nitrogen and five evacuations/backfilling cycles under high vacuum. The mixture was allowed to react for 6 h at 120 °C. The reaction was quenched by water and the reaction mixture was extracted with EA for three times. The combined organic layer was washed with brine and dried over anhydrous Na<sub>2</sub>SO<sub>4</sub>. The solvent was removed under vacuum and the residue was purified by a flash column chromatography on silica gel using ethyl acetate and petroleum (PE:EA=20:1) as eluent to provide the desired product **3e**. 95% yield.

## 6. Experiments for Iterative Reaction

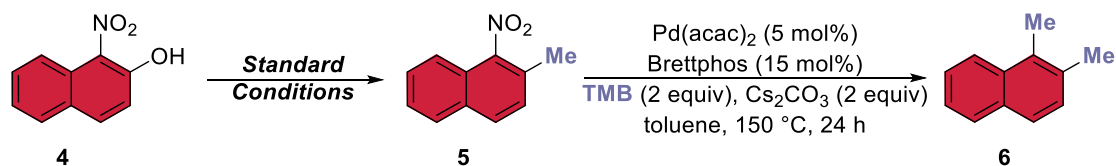

A 25mL Schlenk flask equipped with a stirring bar is filled with 1-nitronaphthalen-2-ol **4** (0.2 mmol, 1.0 equiv.),  $\text{Et}_3\text{N}$  (1.0 mmol, 5.0 equiv.), dioxane (1 mL). Under positive pressure of  $\text{SO}_2\text{F}_2$  gas, five evacuation/backfill cycles are performed under high vacuum to fill the reaction tube and vigorous stirring at room temperature for 2h. Then addition  $\text{Pd}(\text{OAc})_2$  (5 mol%), RuPhos (6 mol%),  $\text{K}_3\text{PO}_4$  (0.4 mmol, 2.0 equiv.), trimethylboroxine (0.1 mmol, 0.5 equiv.), dioxane (1 mL). Under a positive pressure of nitrogen and five evacuations/backfilling cycles under high vacuum. The mixture was allowed to react for 2 h at 120 °C. The reaction was quenched by water and the reaction mixture was extracted with EA for three times. The combined organic layer was washed with brine and dried over anhydrous  $\text{Na}_2\text{SO}_4$ . The solvent was removed under vacuum and the residue was purified by a flash column chromatography on silica gel using ethyl acetate and petroleum (PE:EA=10:1) as eluent to provide the desired product **5**. 83% yield.

Next, a 25mL Schlenk flask equipped with a stirring bar is filled with 2-methyl-1-nitronaphthalene **5** (0.2 mmol, 1.0 equiv.),  $\text{Pd}(\text{acac})_2$  (5 mol%), BrettPhos (15 mol%),  $\text{Cs}_2\text{CO}_3$  (0.4 mmol, 2.0 equiv.), trimethylboroxine (0.4 mmol, 2.0 equiv.), toluene (1 mL). Under a positive pressure of nitrogen and five evacuations/backfilling cycles under high vacuum. The mixture was allowed to react for 24 h at 150 °C. The reaction was quenched by water and the reaction mixture was extracted with EA for three times. The combined organic layer was washed with brine and dried over anhydrous  $\text{Na}_2\text{SO}_4$ . The solvent was removed under vacuum and the residue was purified by a flash column chromatography on silica gel using ethyl acetate and petroleum (PE:EA=20:1) as eluent to provide the desired product **6**.<sup>27</sup> 54% yield.

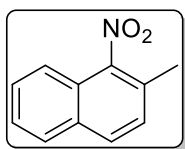

### 2-methyl-1-nitronaphthalene (5)

Yellow solid, 83% yield, 31.0 mg.

**<sup>1</sup>H NMR** (400 MHz, Chloroform-*d*)  $\delta$  7.89 (d,  $J$  = 8.3 Hz, 2H), 7.74 (d,  $J$  = 8.5 Hz, 1H), 7.62 (t,  $J$  = 7.7 Hz, 1H), 7.56 (t,  $J$  = 7.5 Hz, 1H), 7.37 (d,  $J$  = 8.4 Hz, 1H), 2.53 (s, 3H).

**<sup>13</sup>C NMR** (101 MHz, Chloroform-*d*)  $\delta$  132.26 , 130.44 , 128.52 , 128.04 (d,  $J$  = 14.9 Hz), 127.53 , 126.65 , 124.69 , 121.25 , 17.85 .

**HRMS** (EI-TOF) calcd for C<sub>11</sub>H<sub>9</sub>NO<sub>2</sub>: 187.0633; Found: 187.0640.

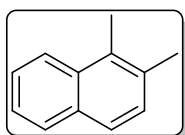

### 1,2-dimethylnaphthalene (6)

Colorless oil, 54% yield, 16.8 mg.

**<sup>1</sup>H NMR** (600 MHz, Chloroform-*d*)  $\delta$  8.15 (d,  $J$  = 8.5 Hz, 1H), 7.91 (d,  $J$  = 8.1 Hz, 1H), 7.73 (d,  $J$  = 8.3 Hz, 1H), 7.60 (t,  $J$  = 7.0 Hz, 1H), 7.53 (t,  $J$  = 7.9 Hz, 1H), 7.41 (d,  $J$  = 8.3 Hz, 1H), 2.71 (s, 3H), 2.60 (s, 3H).

**<sup>13</sup>C NMR** (101 MHz, DMSO-*d*<sub>6</sub>)  $\delta$  133.08 , 132.83 , 132.26 , 131.09 , 128.99 , 128.40 , 125.69 (d,  $J$  = 1.0 Hz), 124.44 , 123.69 , 20.74 , 14.45 .

**HRMS** (EI-TOF) calcd for C<sub>12</sub>H<sub>12</sub>: 156.0939; Found: 156.0944.

## 7: Mechanistic Studies

### 7.1:

**Table S2: Control experiments.<sup>a</sup>**

**D.**

| Entry          | X        | Deviation                            | Yield 3f (%) <sup>b</sup> |
|----------------|----------|--------------------------------------|---------------------------|
| 1              | OH       | -                                    | 99                        |
| 2              | OH       | w / o Pd(OAc) <sub>2</sub>           | 0                         |
| 3              | OH       | w / o Ruphos                         | 0                         |
| 4              | OH       | w / o K <sub>3</sub> PO <sub>4</sub> | 28                        |
| 5 <sup>c</sup> | OH       | w / BHT                              | 99                        |
| 6 <sup>d</sup> | <br>(2f) | -                                    | 99                        |

<sup>a</sup> Reaction conditions: **1f** (0.2 mmol), Et<sub>3</sub>N (1.0 mmol, 5.0 eq.), dioxane (0.2 M), r.t., 2 h, under SO<sub>2</sub>F<sub>2</sub> gas atmosphere; then addition Pd(OAc)<sub>2</sub> (5 mol%), Ruphos (6 mol%), K<sub>3</sub>PO<sub>4</sub> (0.4 mmol, 2.0 equiv.), TMB (0.1 mmol, 0.5 eq.), dioxane (0.2 M), 120 °C, 2 h, under nitrogen atmosphere. <sup>b</sup> Isolated yield. <sup>c</sup> After completion of the reaction at room temperature addition Butylated hydroxytoluene (BHT) (0.4 mmol, 2.0 eq.). <sup>d</sup> **2f** (0.2 mmol), Pd(OAc)<sub>2</sub> (5 mol%), Ruphos (6 mol%), K<sub>3</sub>PO<sub>4</sub> (0.4 mmol, 2.0 equiv.), TMB (0.1 mmol, 0.5 eq.), dioxane (0.2 M), 120 °C, 2 h, under nitrogen atmosphere.

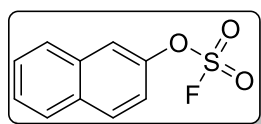

#### naphthalen-2-yl sulfurofluoridate (**2f**)

A 25mL Schlenk flask equipped with a stirring bar is filled with Aryl phenols (0.2 mmol, 1.0 equiv.), Et<sub>3</sub>N (1.0 mmol, 5.0 equiv.), dioxane (1 mL). Under positive pressure of SO<sub>2</sub>F<sub>2</sub> gas, five evacuation/backfill cycles are performed under high vacuum to fill the reaction tube and vigorous stirring at room temperature for 2h. Yellow solid.

<sup>19</sup>F NMR (377 MHz, Chloroform-*d*) δ 37.75 .

## 7.2: Competition experiments.

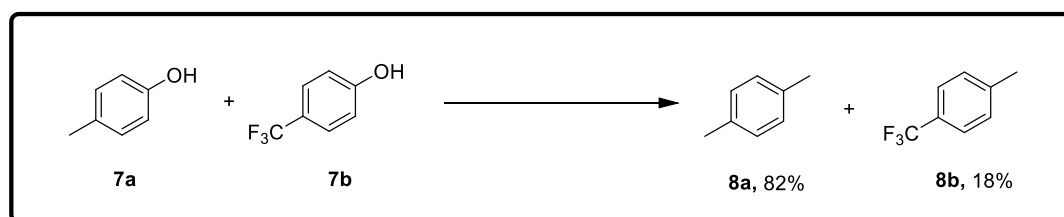

A 25mL Schlenk flask equipped with a stirring bar is filled with p-cresol **7a** (0.2 mmol, 1.0 equiv.), 4-(trifluoromethyl)phenol **7b** (0.2 mmol, 1.0 equiv.), Et<sub>3</sub>N (1.0 mmol, 5.0 equiv.), dioxane (1 mL). Under positive pressure of SO<sub>2</sub>F<sub>2</sub> gas, five evacuation/backfill cycles are performed under high vacuum to fill the reaction tube and vigorous stirring at room temperature for 2h. Then addition Pd(OAc)<sub>2</sub> (5 mol%), RuPhos (6 mol%), K<sub>3</sub>PO<sub>4</sub> (0.4 mmol, 2.0 equiv.), trimethylboroxine (0.67 mmol.), dioxane (1 mL). Under a positive pressure of nitrogen and five evacuations/backfilling cycles under high vacuum. The mixture was allowed to react for 2 h at 120 °C. The reaction was quenched by water and the reaction mixture was extracted with EA for three times. GC yield: **8a** (82%); **8b** (18%).

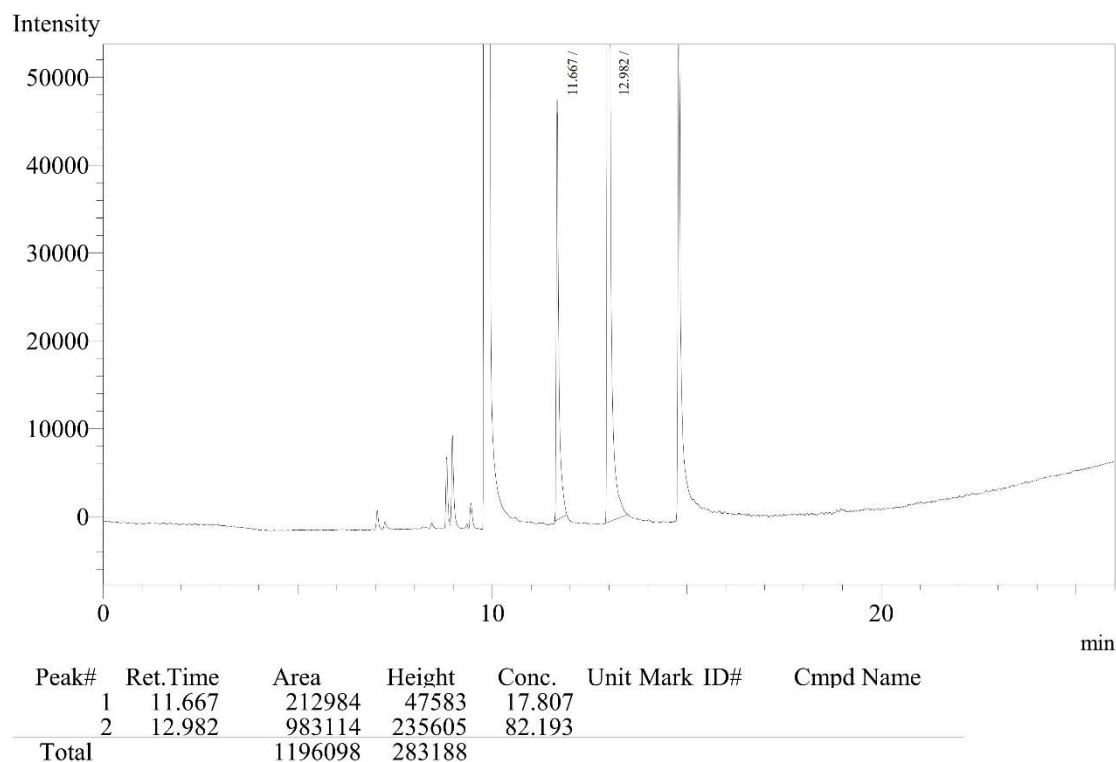

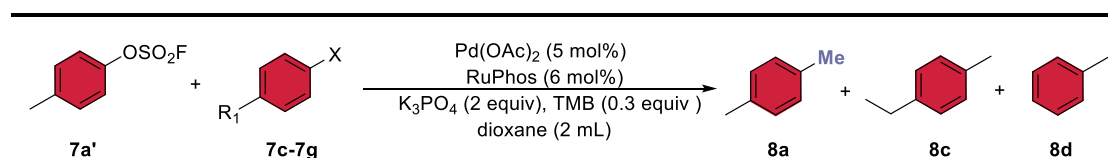

| Entry          | X                   | R <sub>1</sub> | Yield <b>8a</b> : <b>8c</b> : <b>8d</b> (%) <sup>b</sup> |
|----------------|---------------------|----------------|----------------------------------------------------------|
| 1              | Br ( <b>7c</b> )    | Et             | 33:67:0                                                  |
| 2              | Cl ( <b>7d</b> )    | Et             | 81:19:0                                                  |
| 3              | OTf ( <b>7e</b> )   | H              | 21:0:79                                                  |
| 4              | OTs ( <b>7f</b> )   | H              | 17:0:83                                                  |
| 5              | OMs ( <b>7g</b> )   | H              | 77:0:23                                                  |
| 6 <sup>c</sup> | OPFBs ( <b>7h</b> ) | H              | 47:0:53                                                  |

<sup>a</sup> Reaction conditions: **7a'** (0.2 mmol),  $\text{Pd}(\text{OAc})_2$  (5 mol%), RuPhos (6 mol%),  $\text{K}_3\text{PO}_4$  (0.4 mmol, 2.0 equiv.), TMB (0.1 mmol, 0.5 eq.), dioxane (0.1 M), 120 °C, 2 h, under nitrogen atmosphere. <sup>b</sup> Yields determined by high performance liquid chromatography. <sup>c</sup> OPFBs = 2,3,4,5,6-pentafluorobenzenesulfonate.

A 25mL Schlenk flask equipped with a stirring bar is filled with **7a'** (0.2 mmol, 1.0 equiv.), **7c** (or **7d-7h**) (0.2 mmol, 1.0 equiv.),  $\text{Pd}(\text{OAc})_2$  (5 mol%), RuPhos (6 mol%),  $\text{K}_3\text{PO}_4$  (0.4 mmol, 2.0 equiv.), trimethylboroxine (0.67 mmol.), dioxane (2 mL). Under a positive pressure of nitrogen and five evacuations/backfilling cycles under high vacuum. The mixture was allowed to react for 2 h at 120 °C. The reaction was quenched by water and the reaction mixture was extracted with EA for three times.

### 7.3: Kinetic experiments.

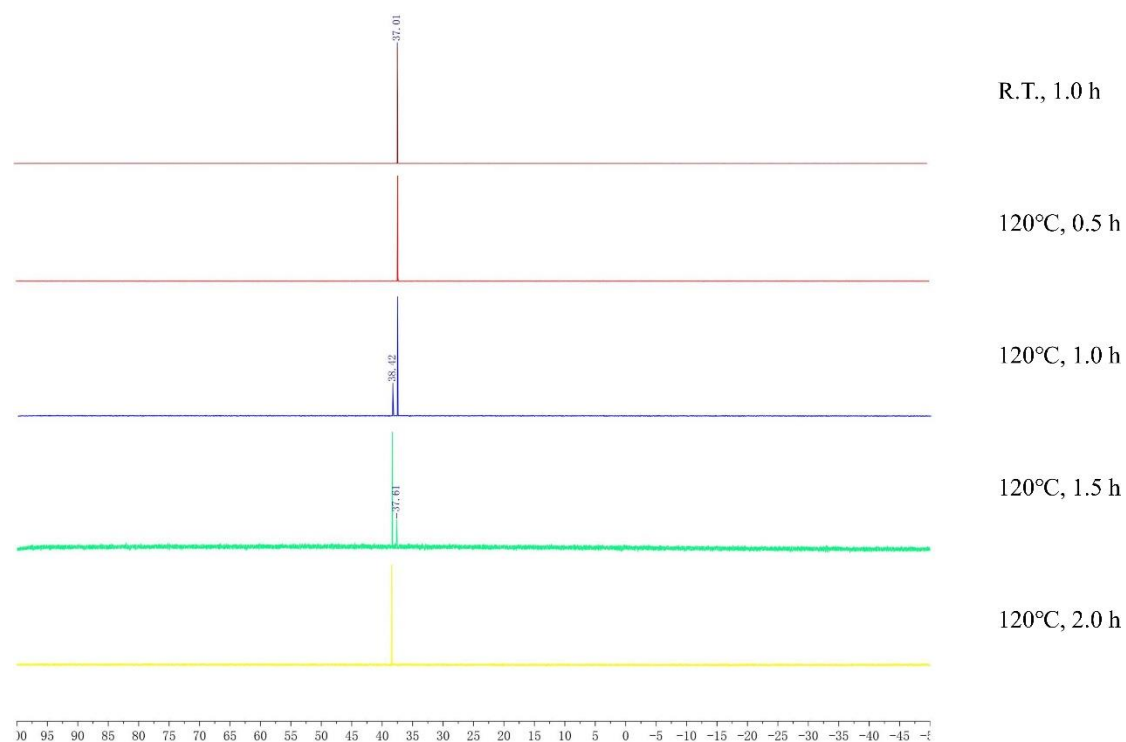

**Scheme S1**  $^{19}\text{F}$  NMR under different reaction times.

## 7.4: GC-MS analysis of 3c.

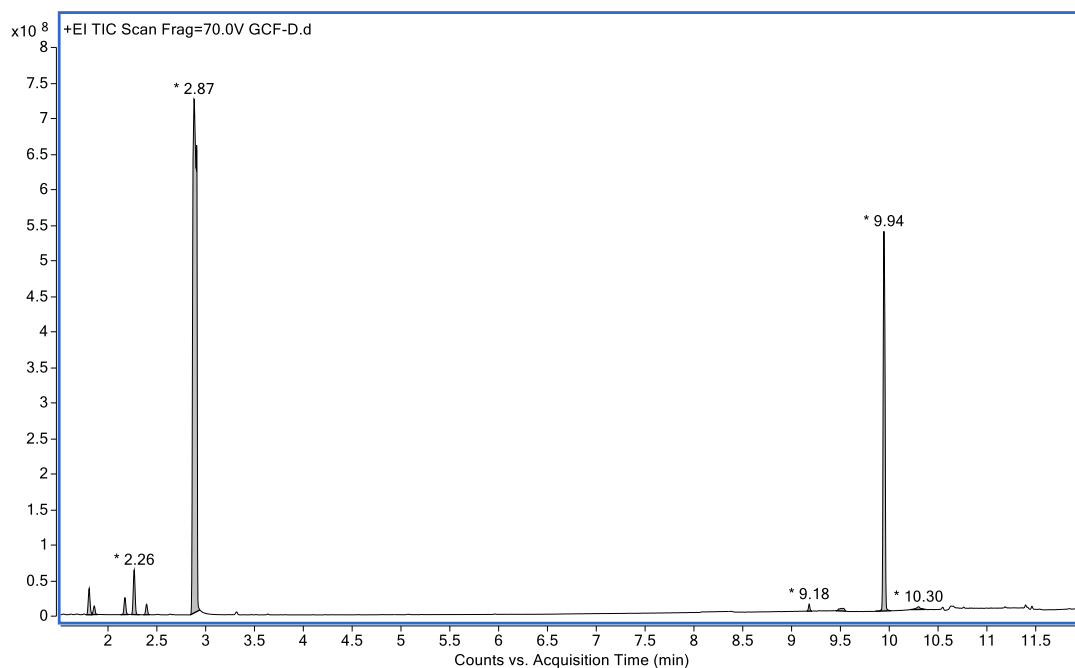

Unknown: +EI Scan (rt: 2.16-2.17 min, 3 scans) Frag=70.0V GCF-D.D Subtract  
Compound in Library Factor = 196

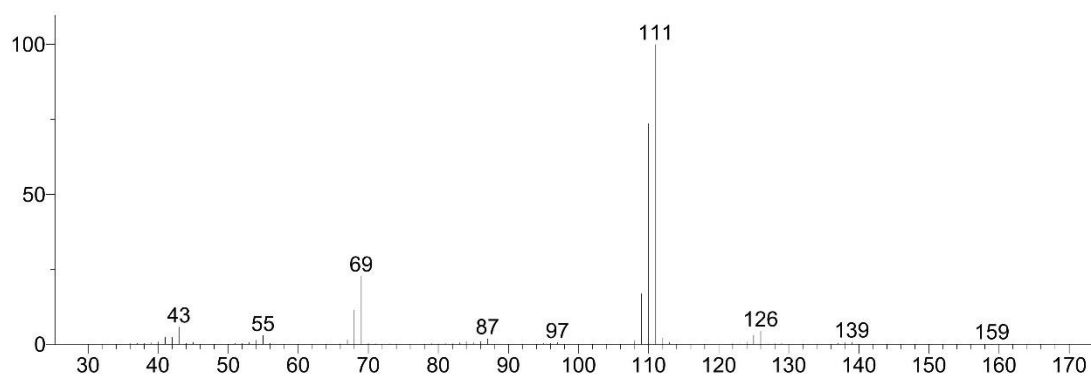

Hit 1 : Trimethylboroxine  
C3H9B3O3; MF: 852; RMF: 867; Prob 92.7%; CAS: 823-96-1; Lib: mainlib; ID: 109260.

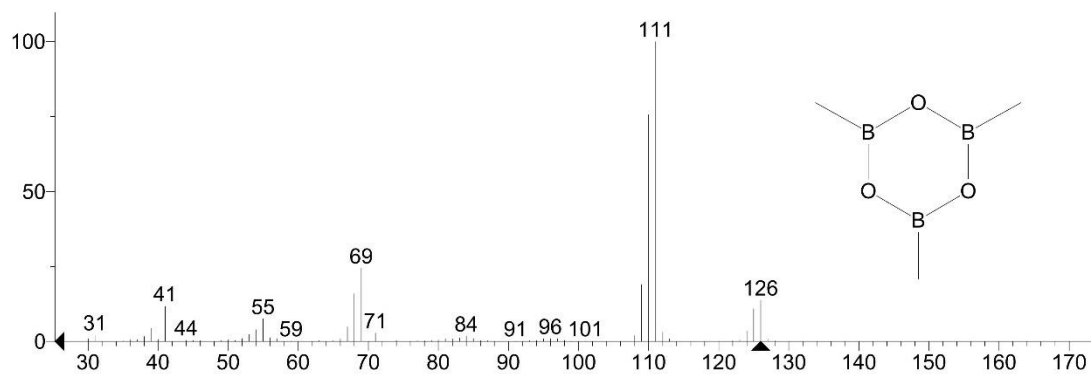

Unknown: +EI Scan (rt: 9.92-9.93 min, 3 scans) Frag=70.0V GCF-D.D Subtract  
Compound in Library Factor = 133

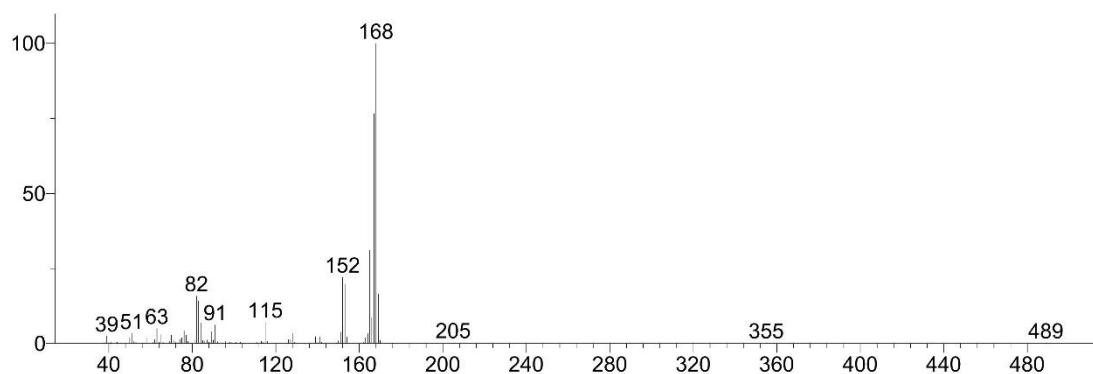

Hit 1 : 1,1'-Biphenyl, 4-methyl-  
C<sub>13</sub>H<sub>12</sub>; MF: 928; RMF: 934; Prob 31.9%; CAS: 644-08-6; Lib: mainlib; ID: 195914.

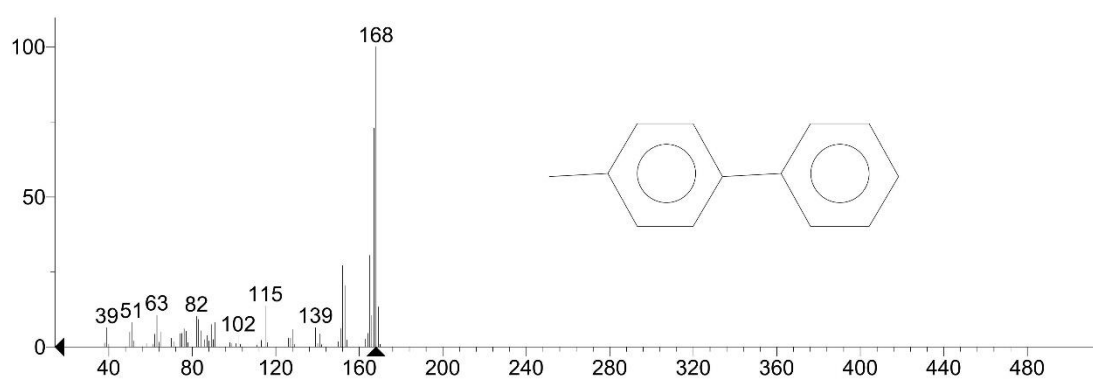

**Scheme S2** GC-MS of the 2h reaction system.

## **8: Copies of $^1\text{H}$ , $^{13}\text{C}$ and $^{19}\text{F}$ spectra for products**

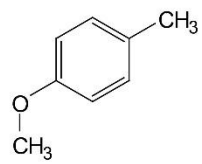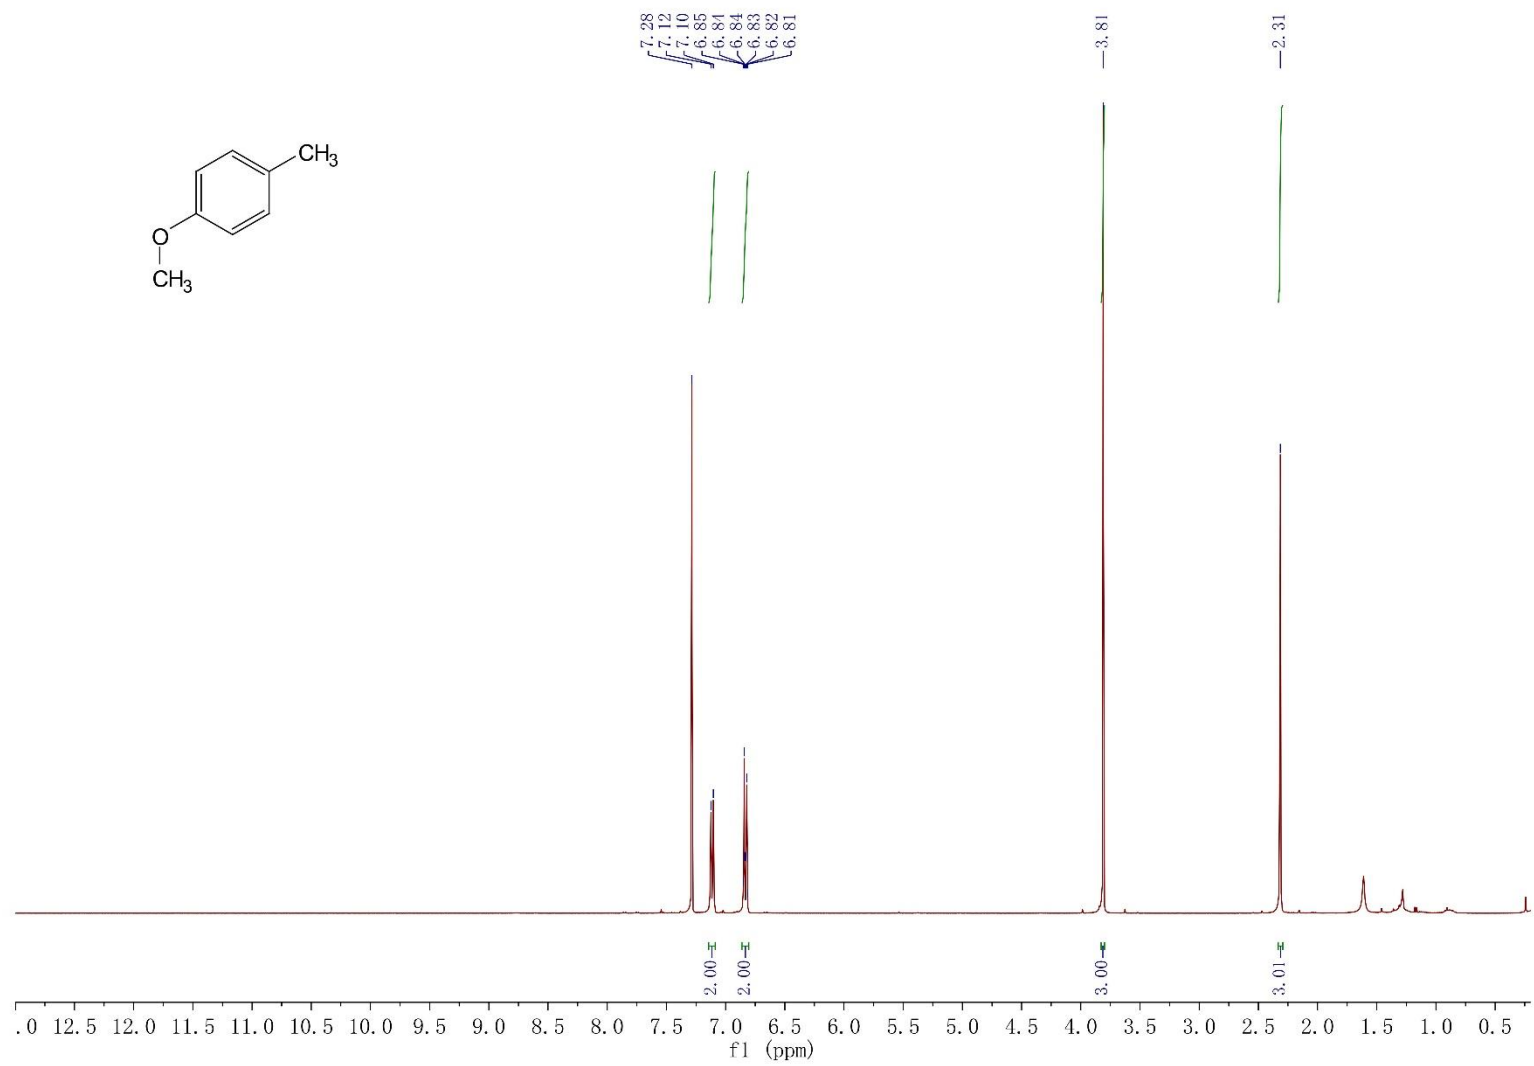

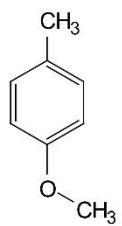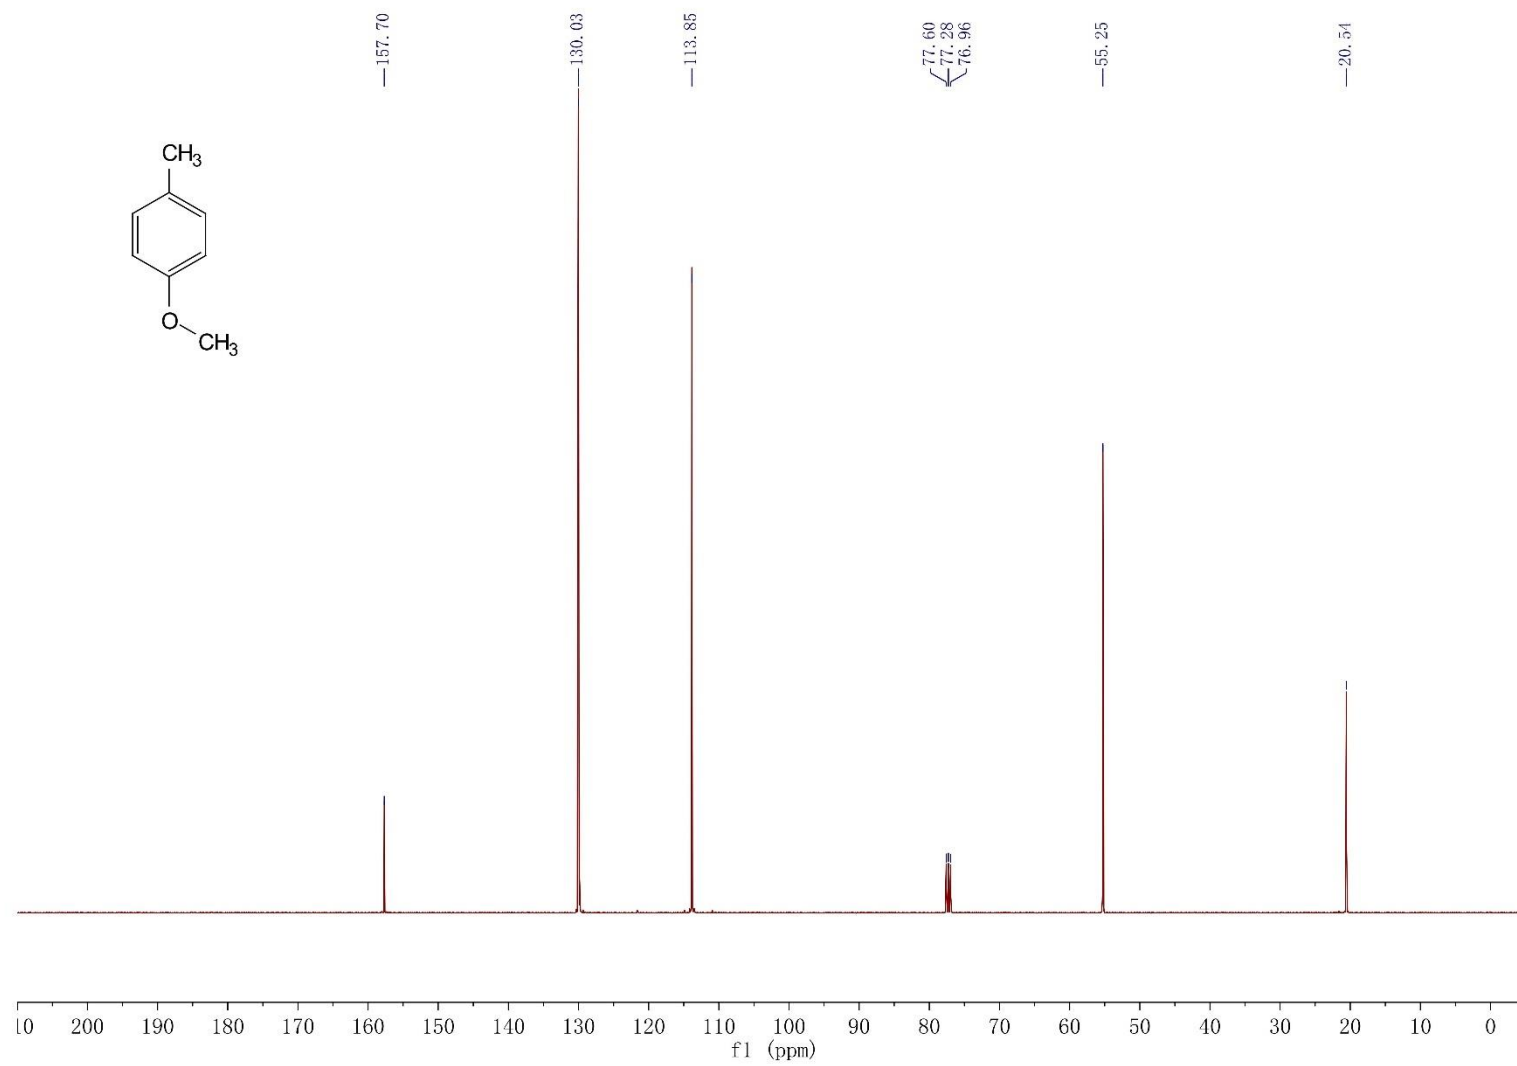

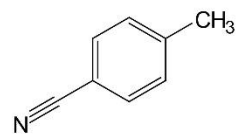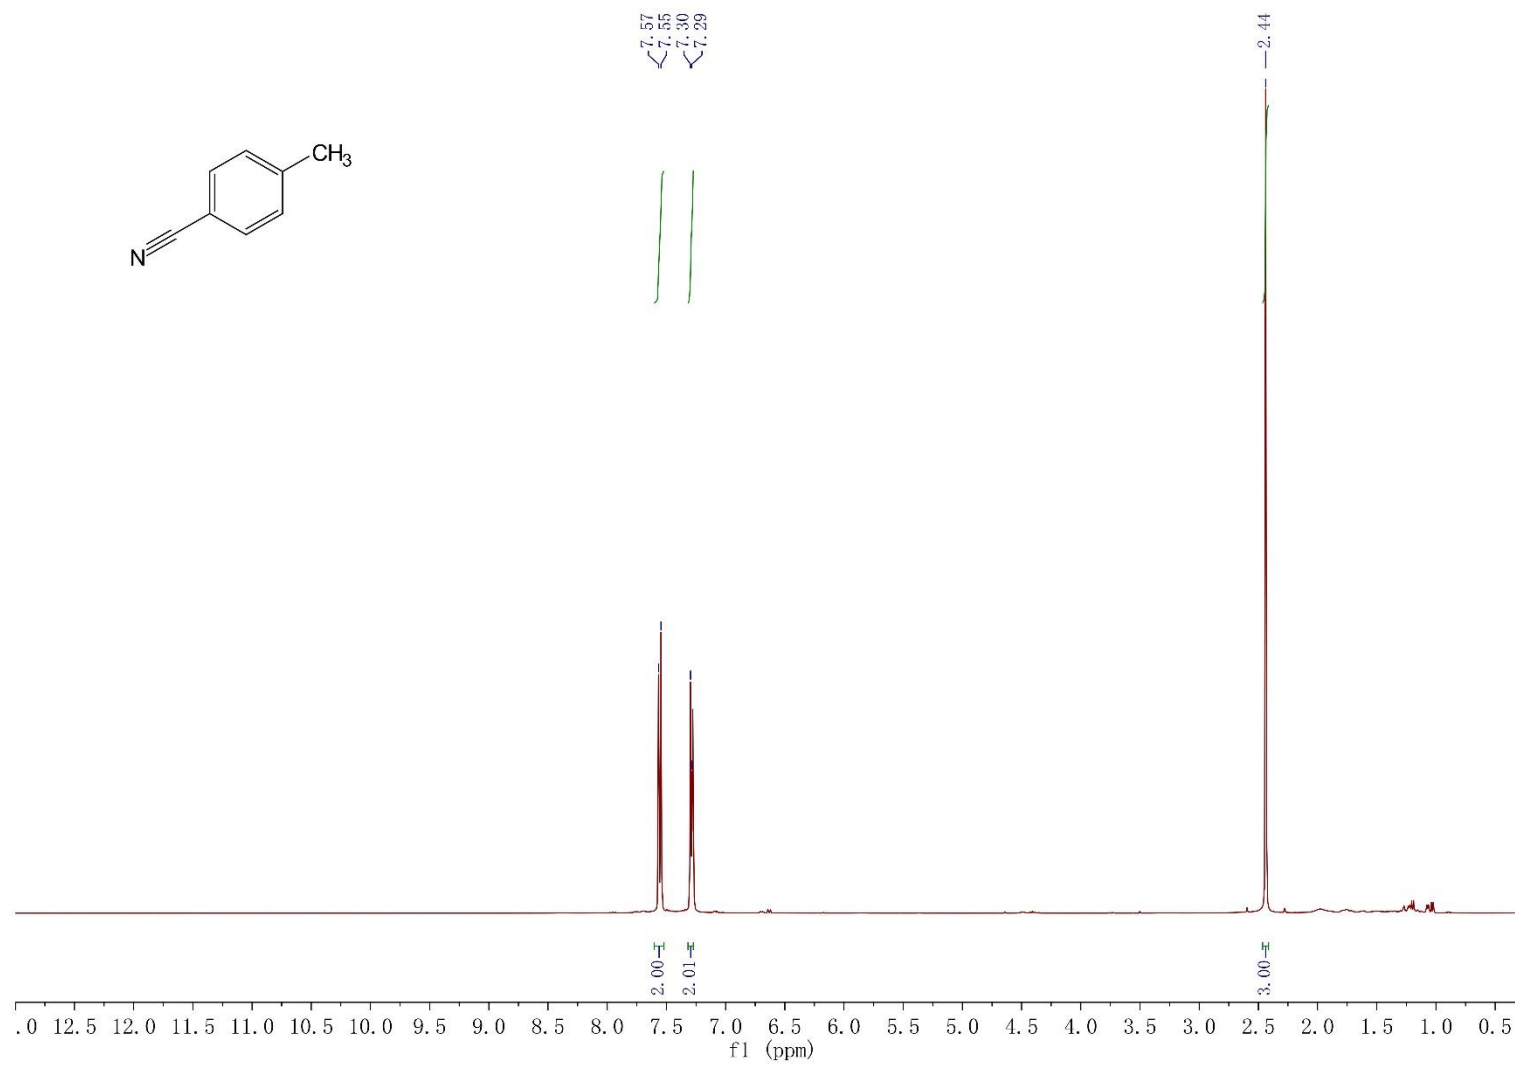

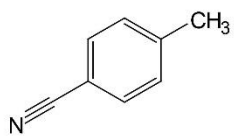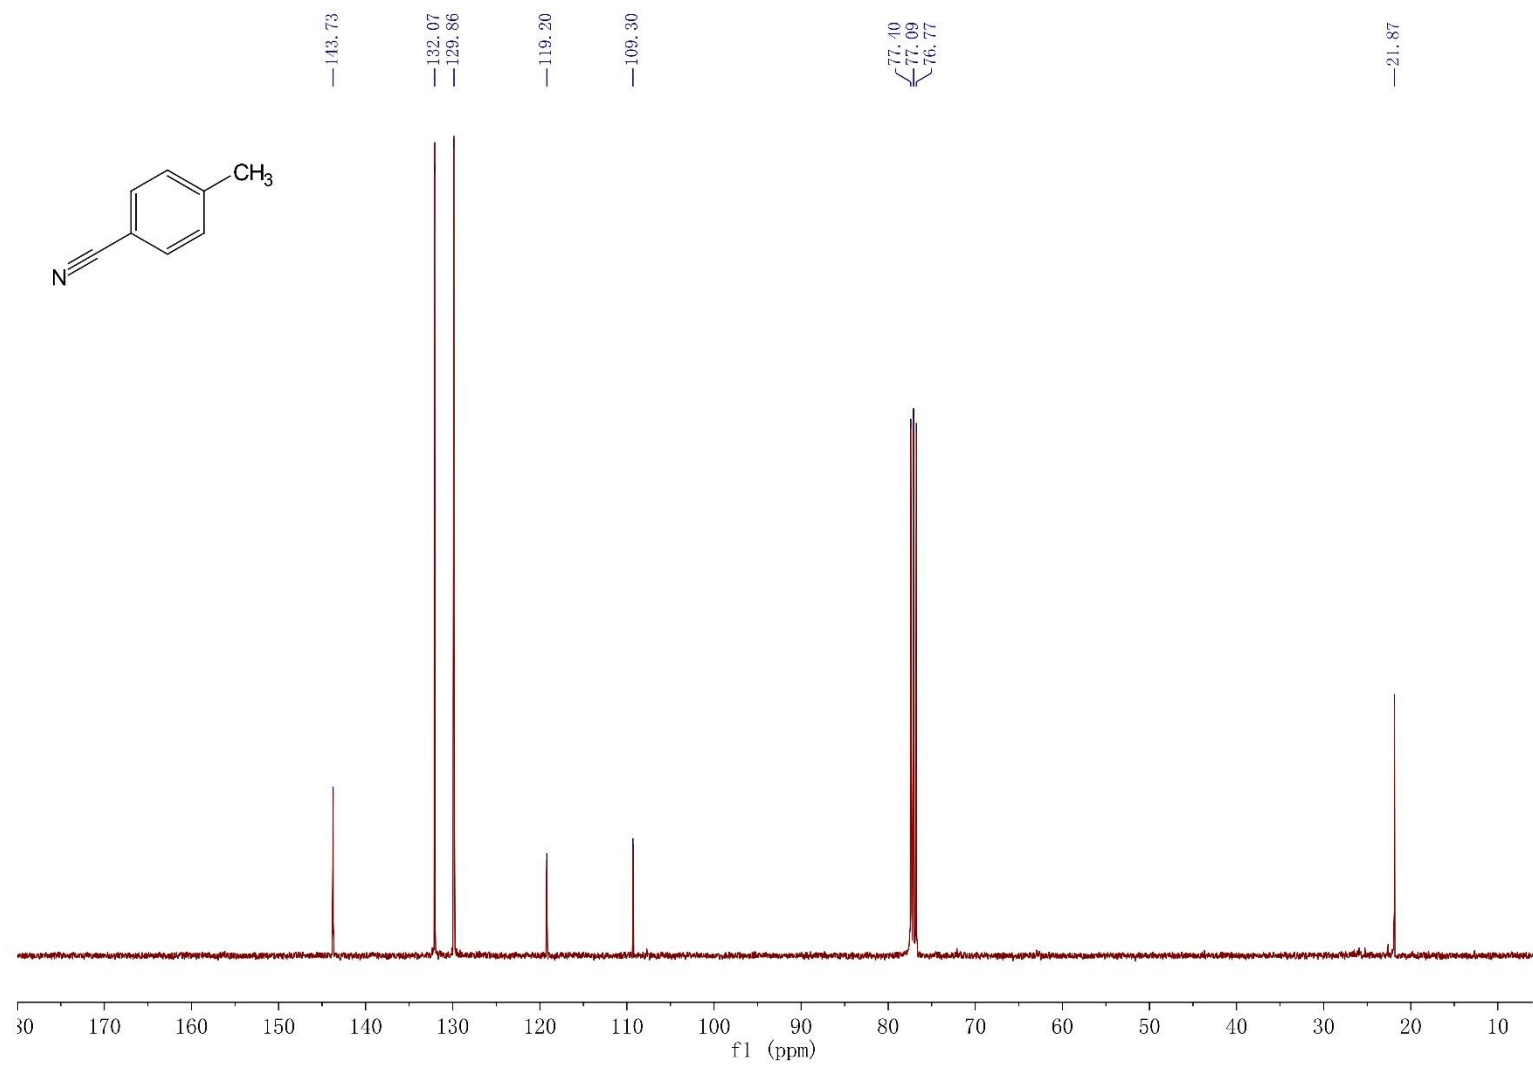

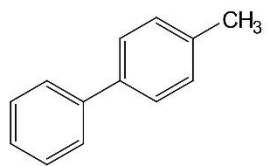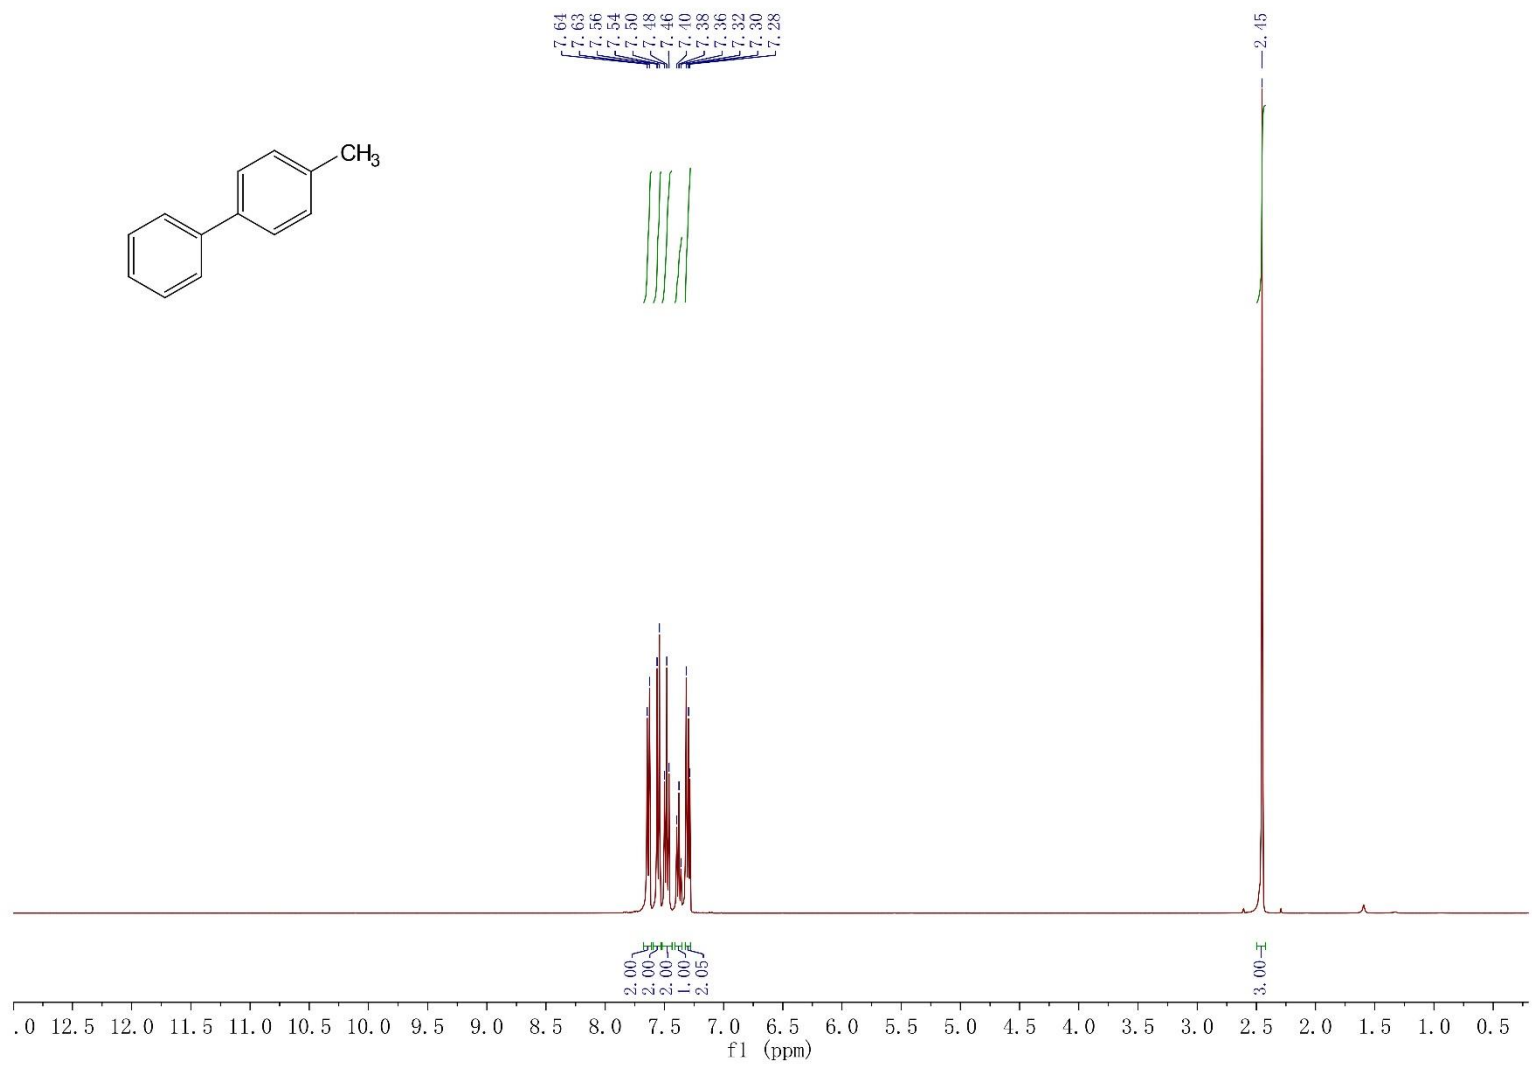

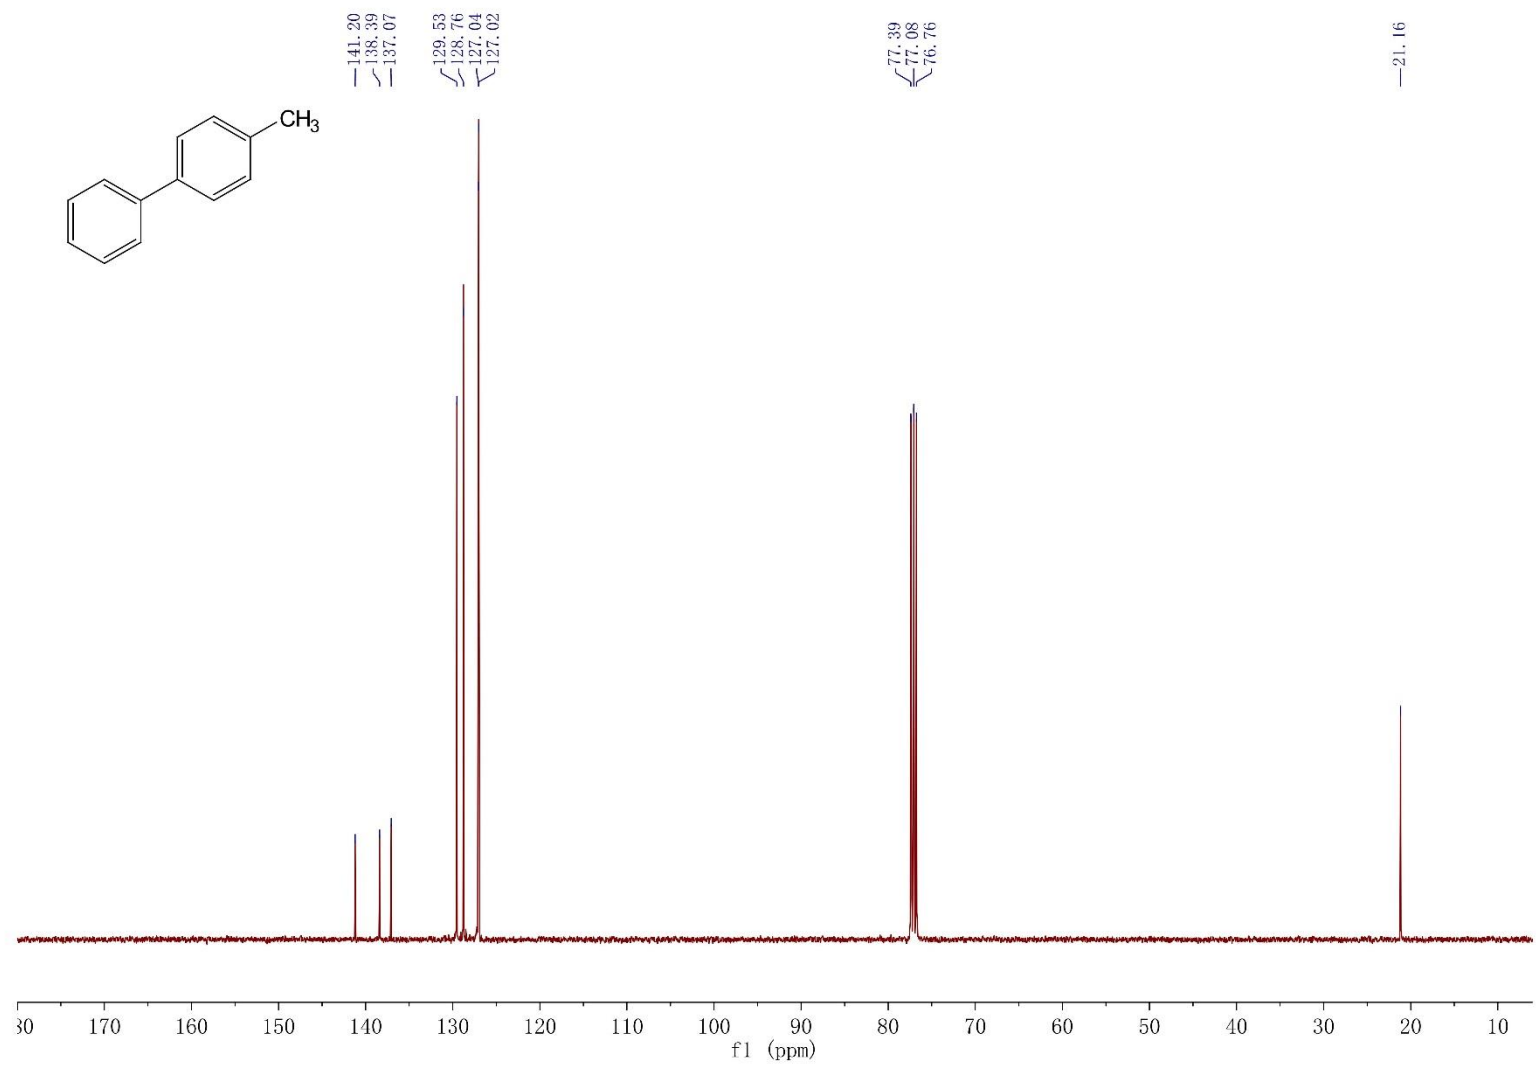

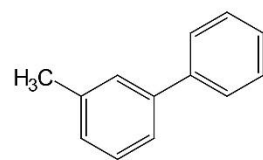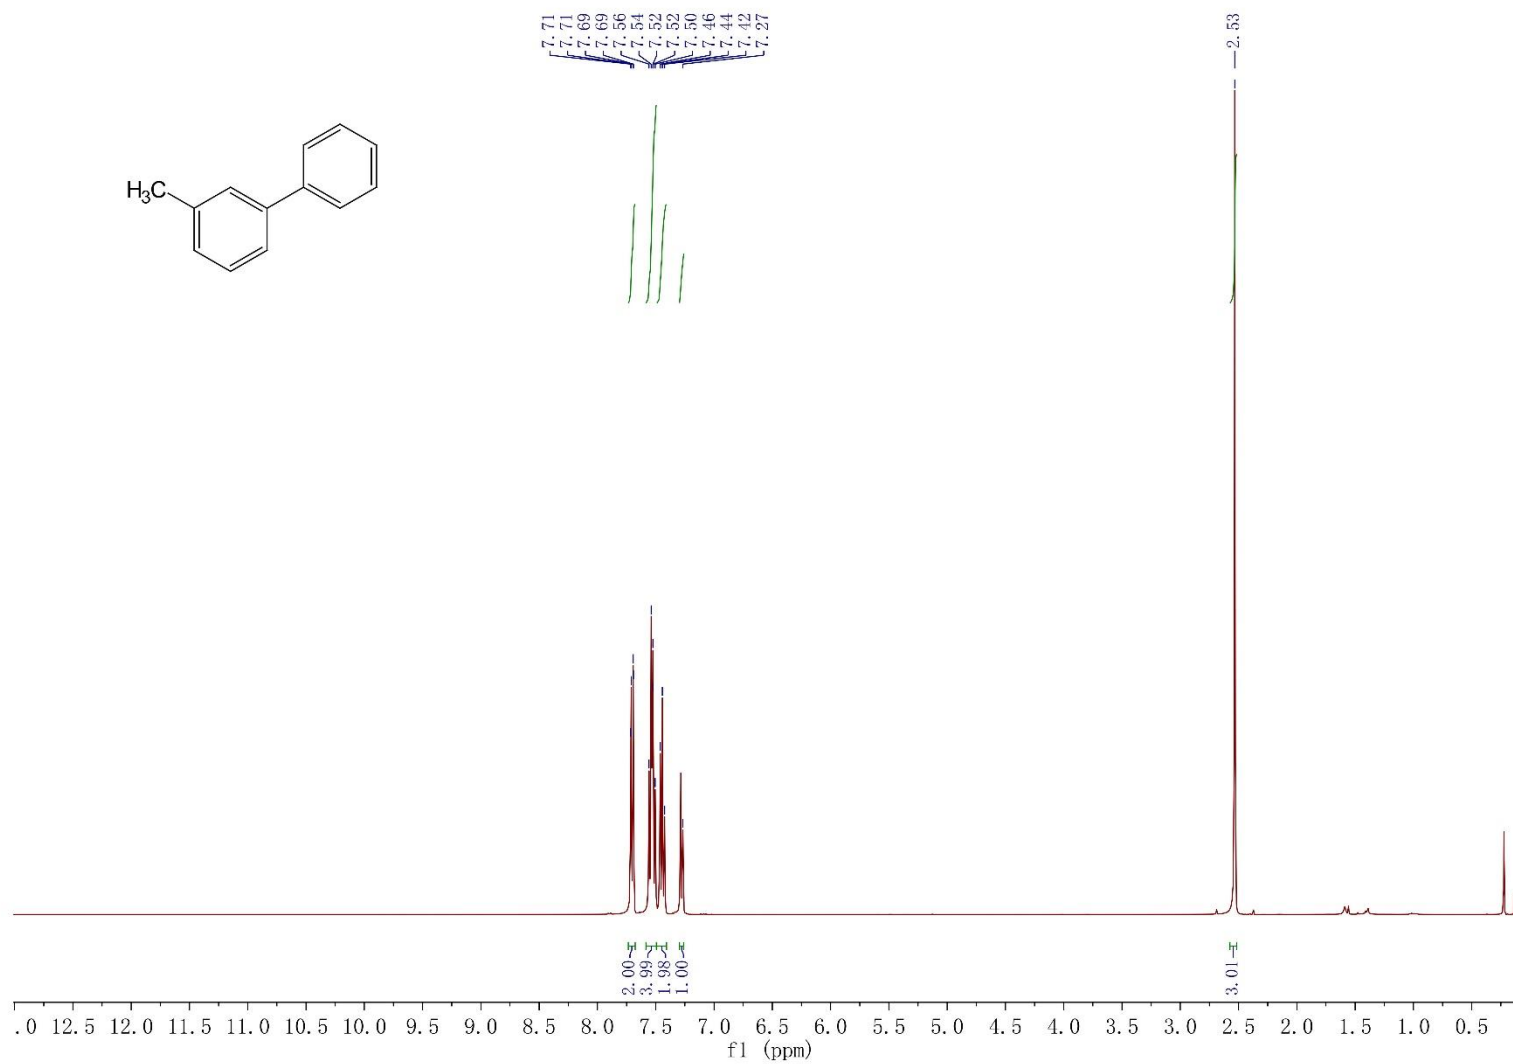

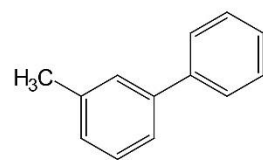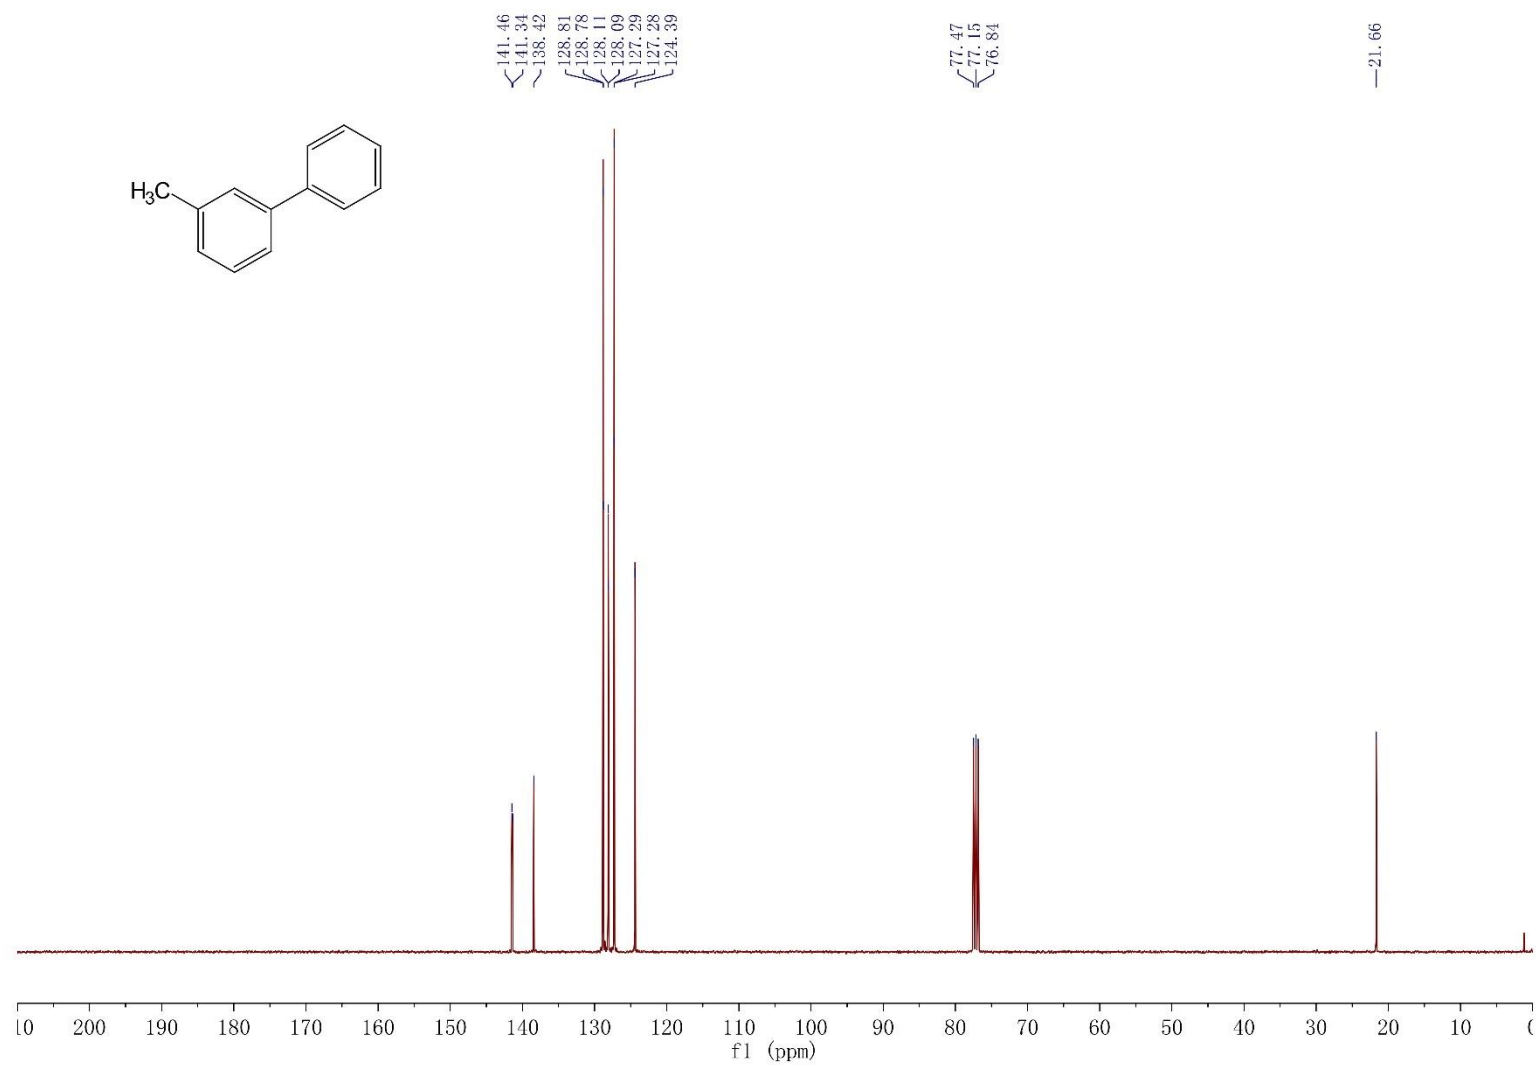

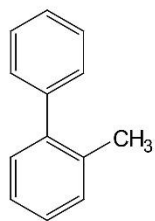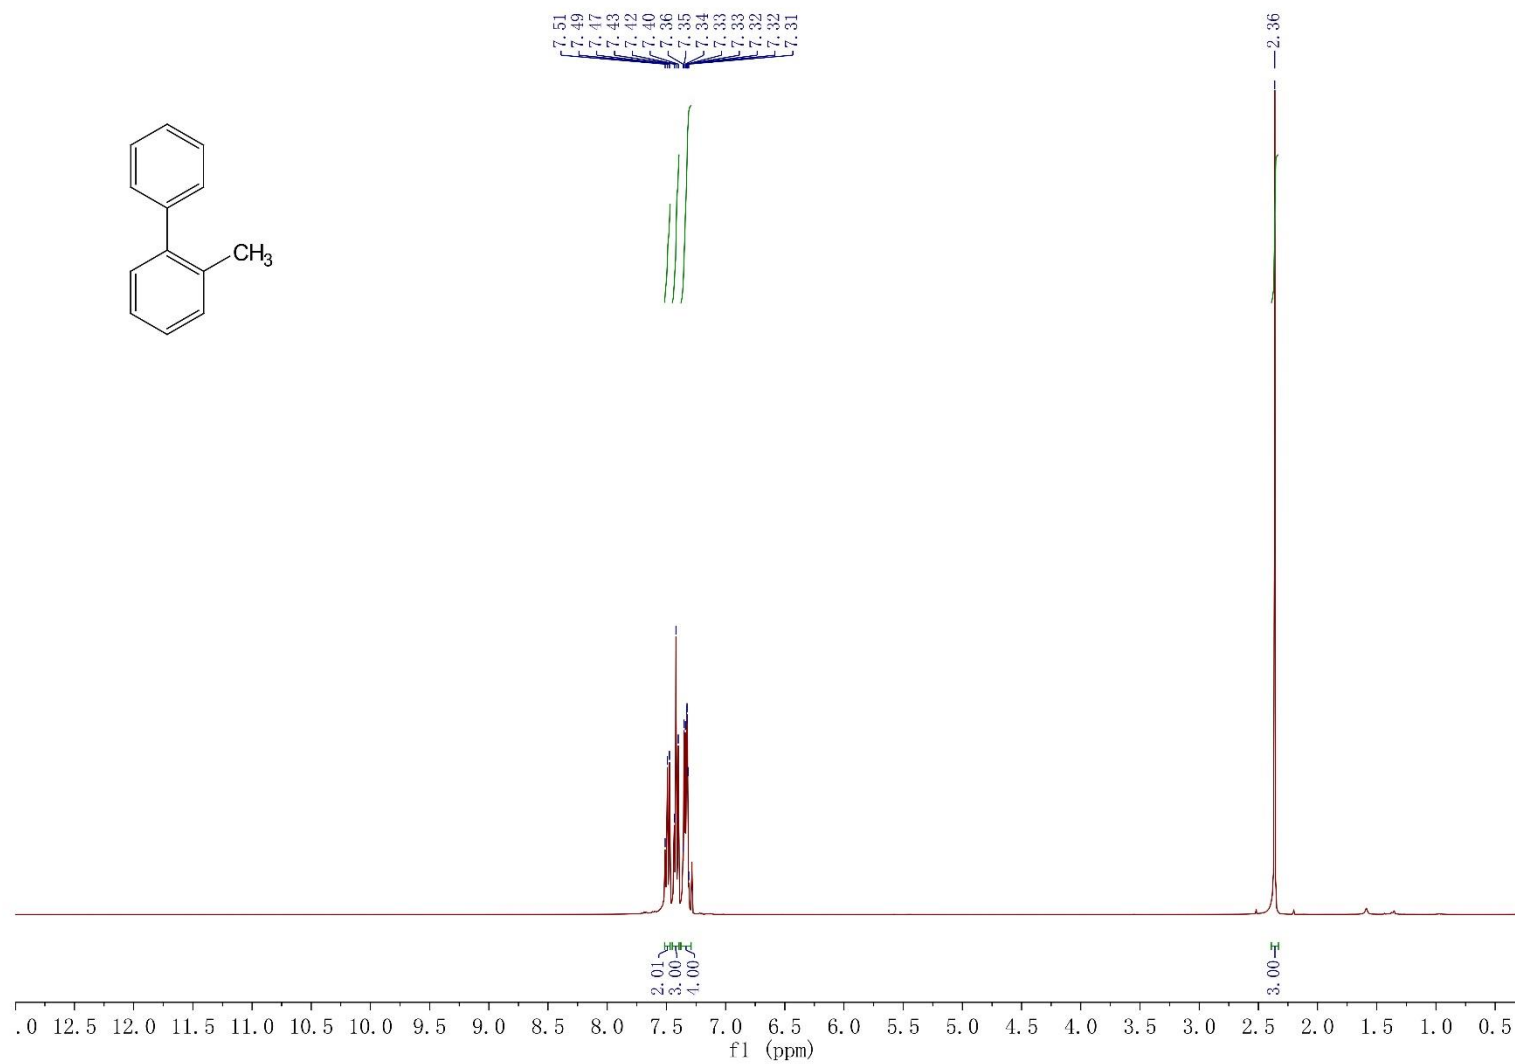

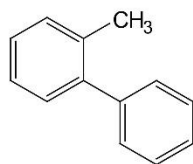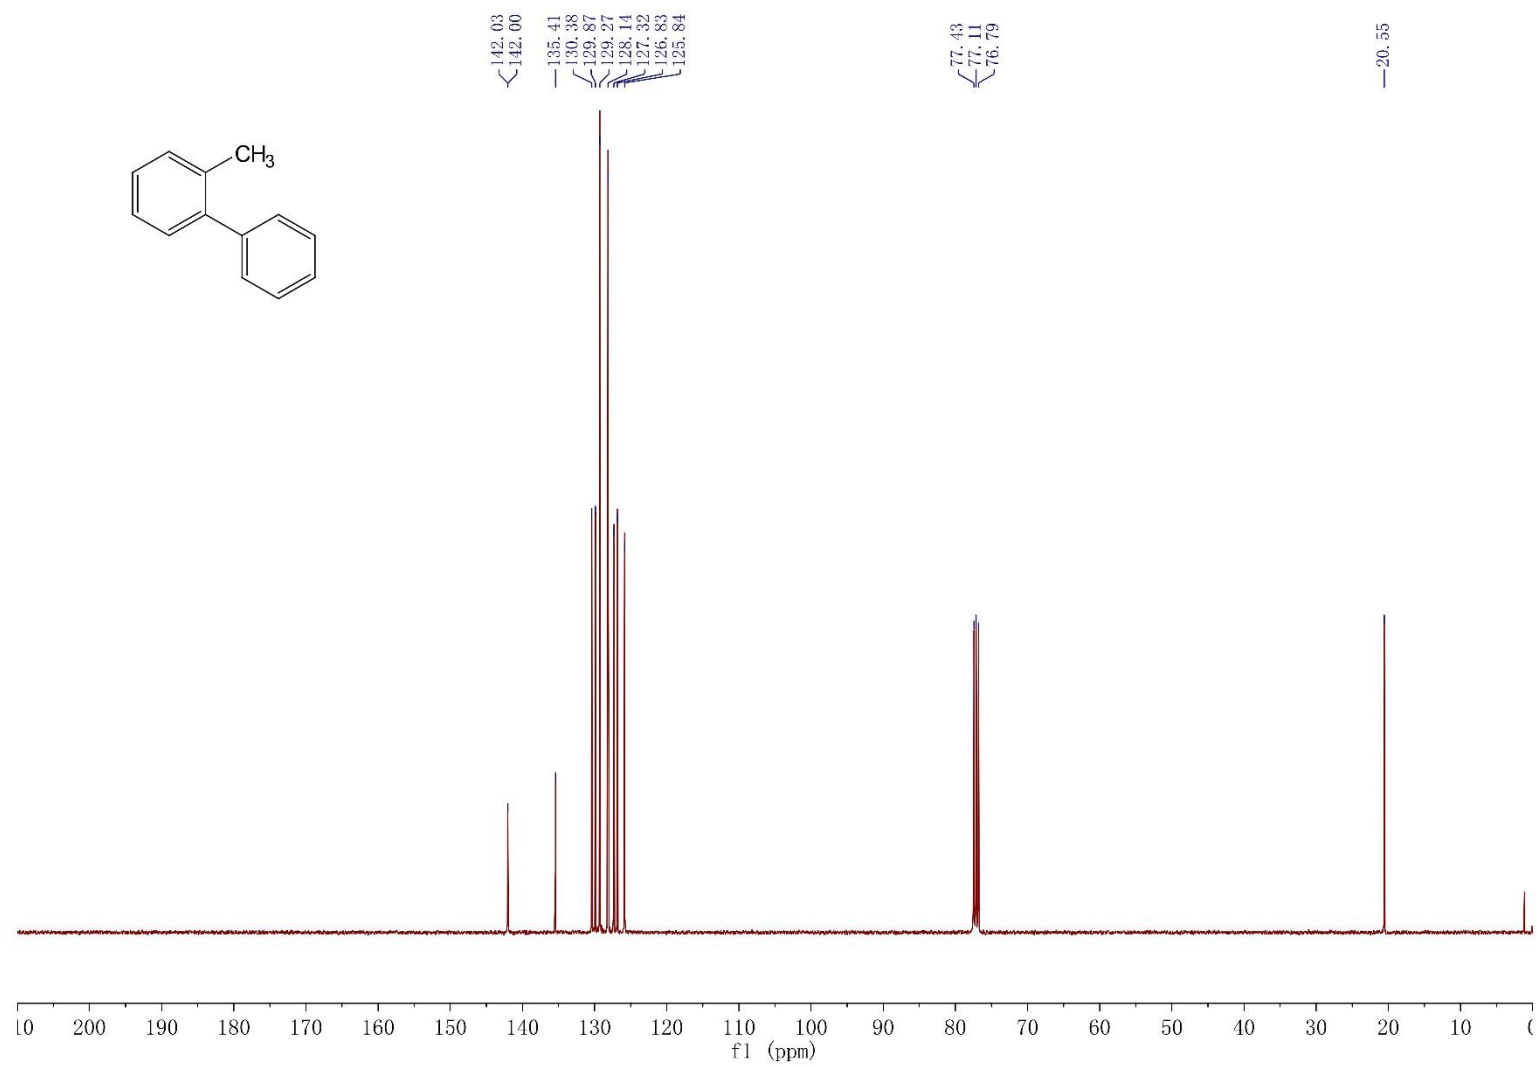

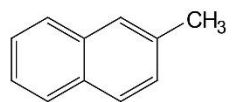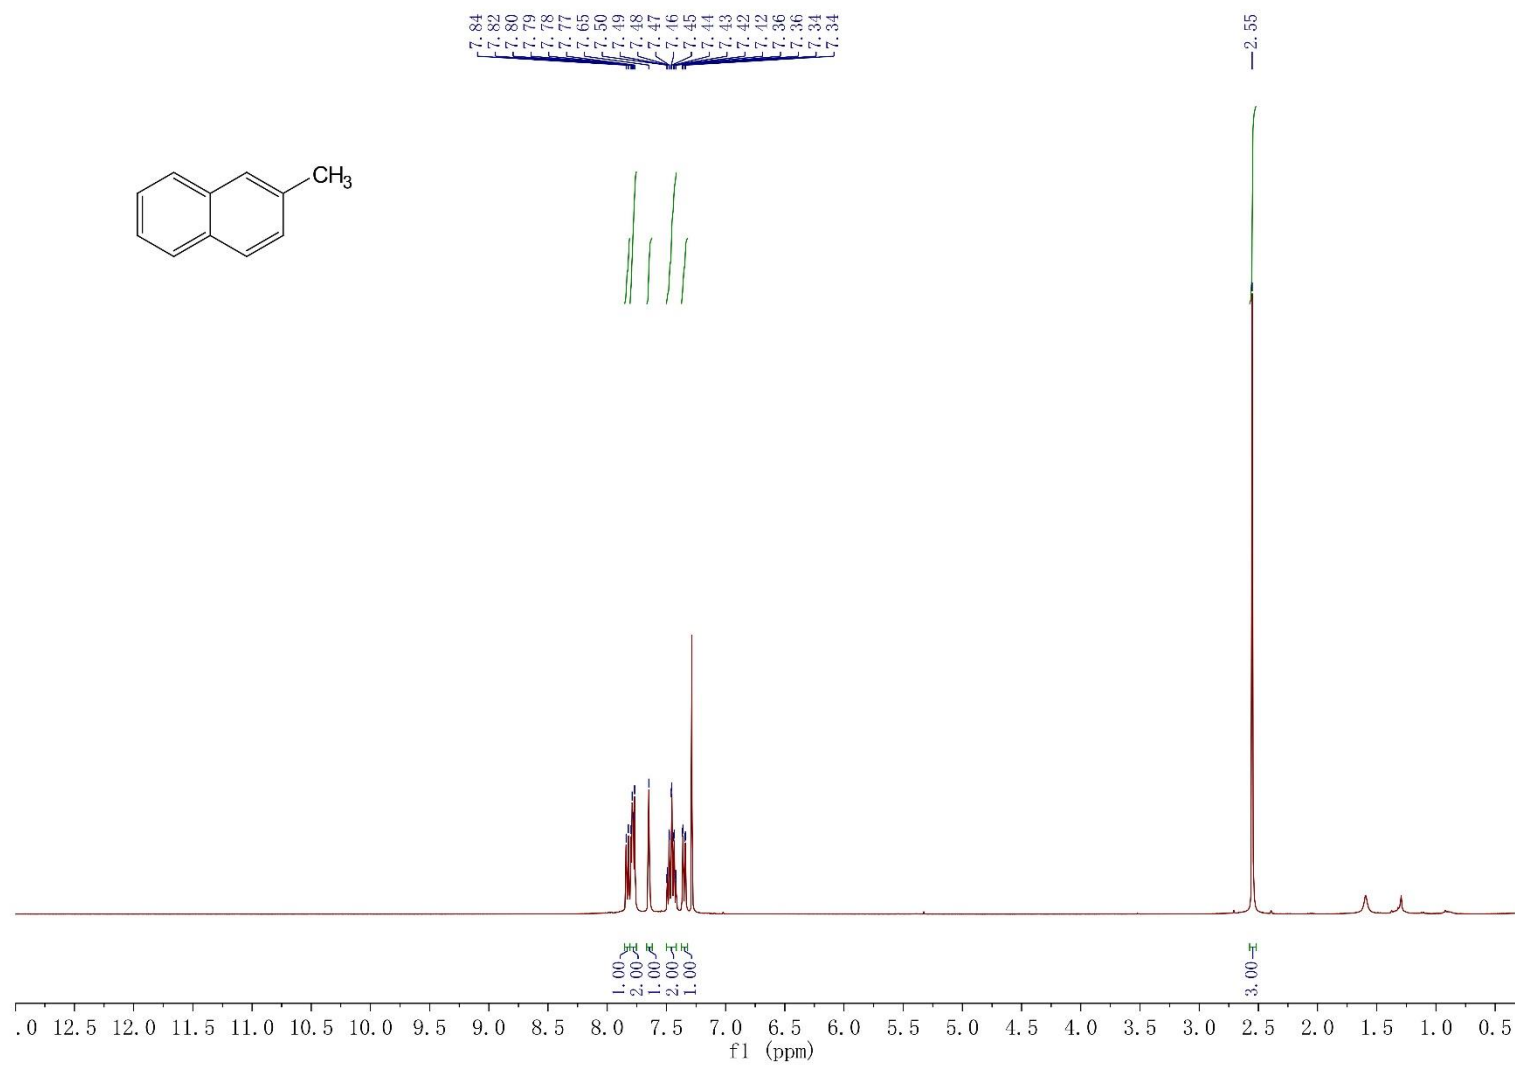

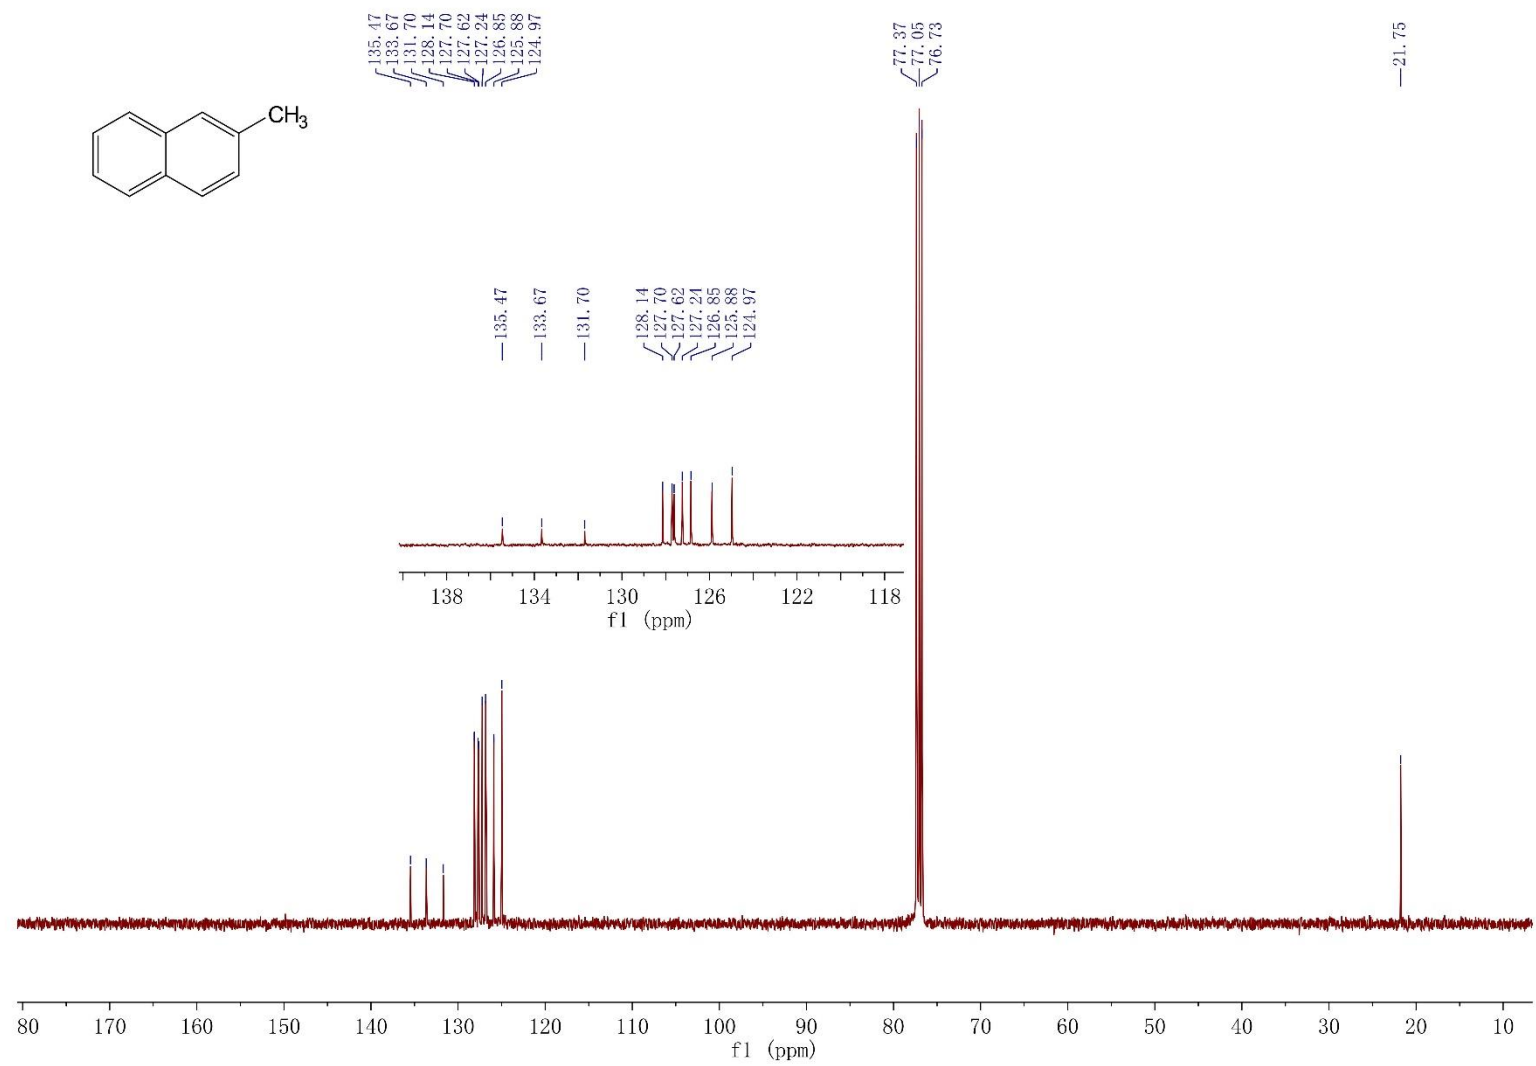

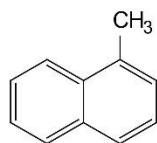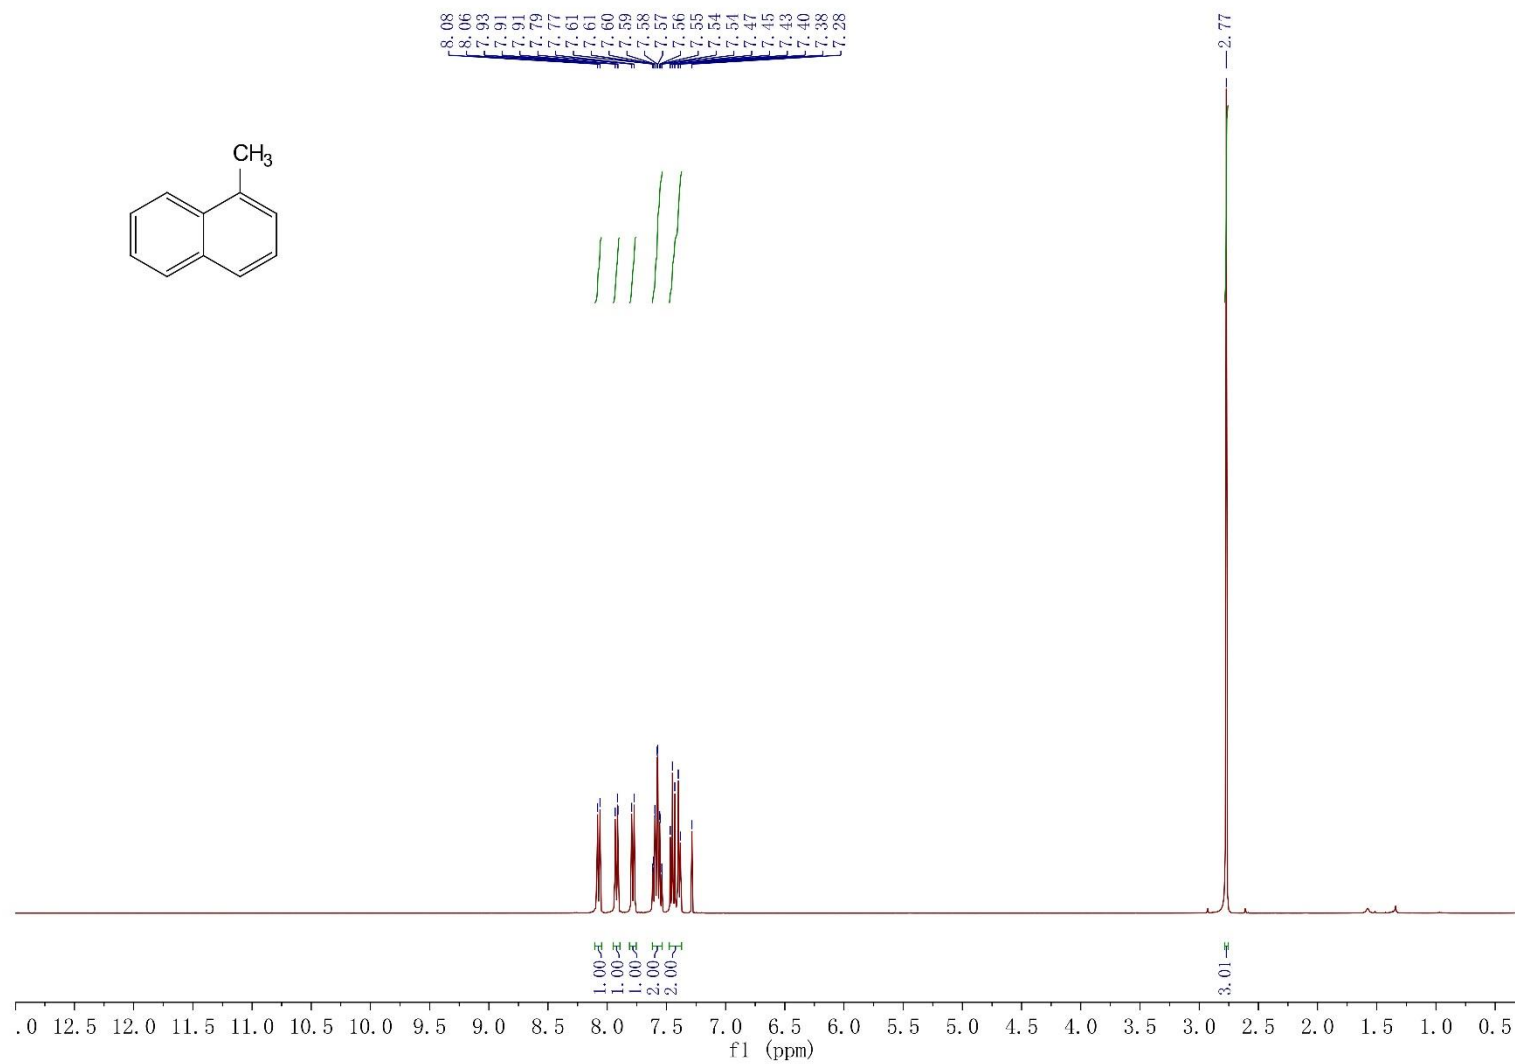

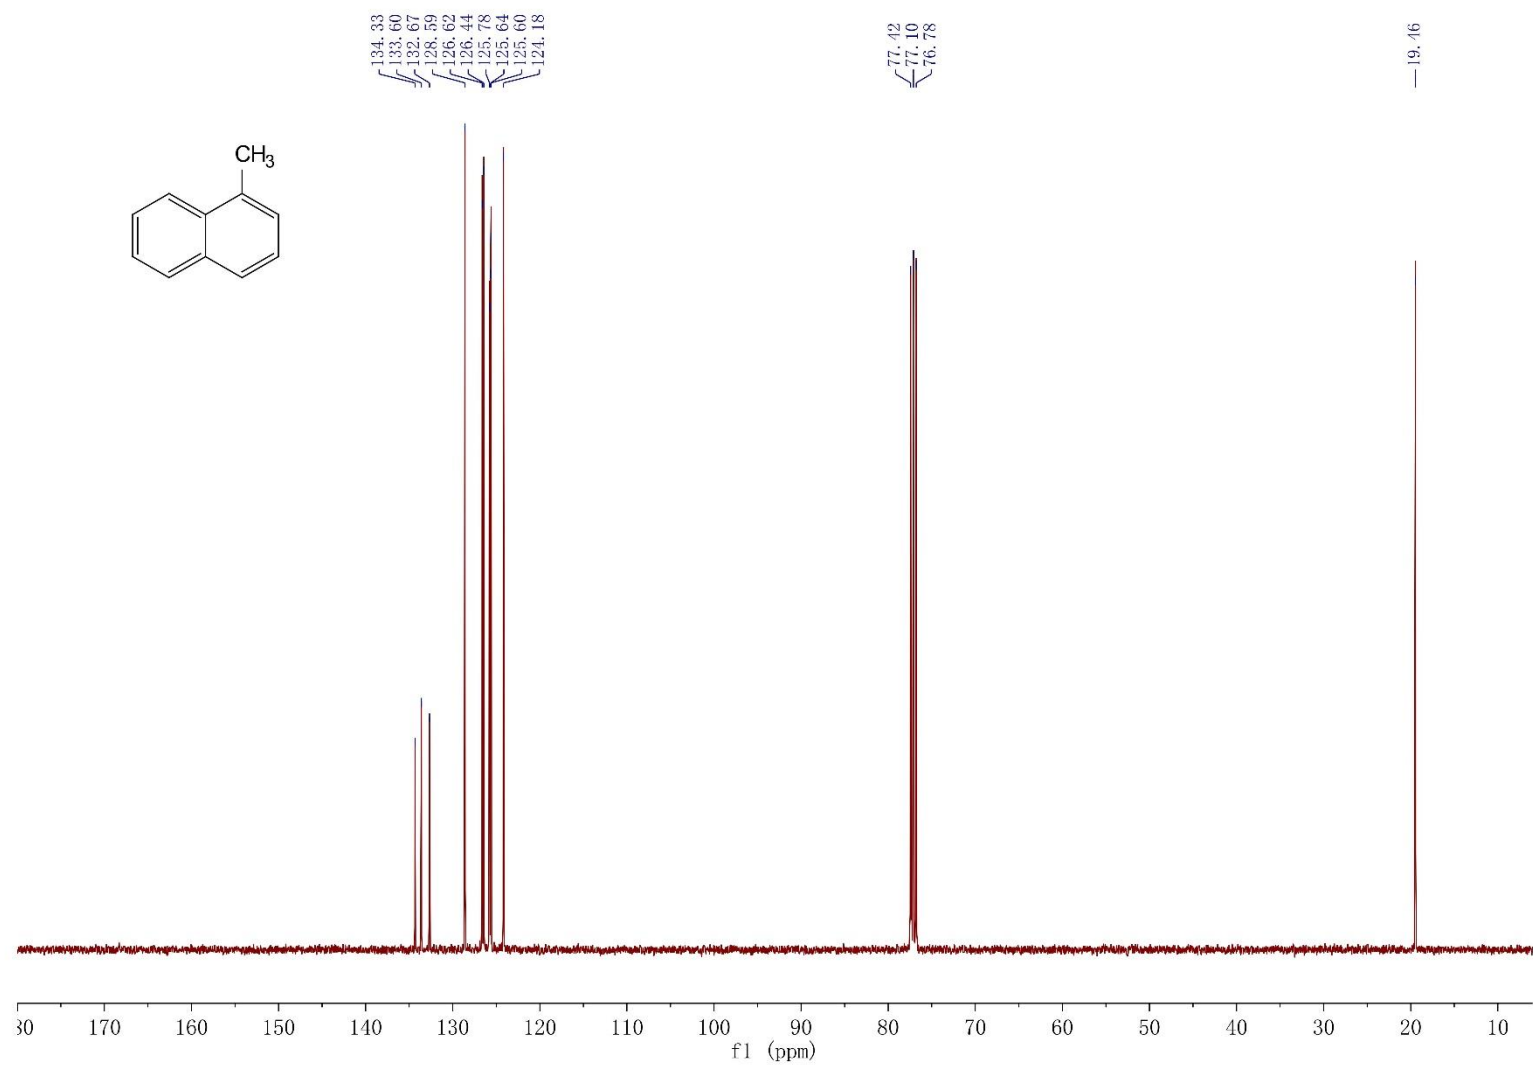

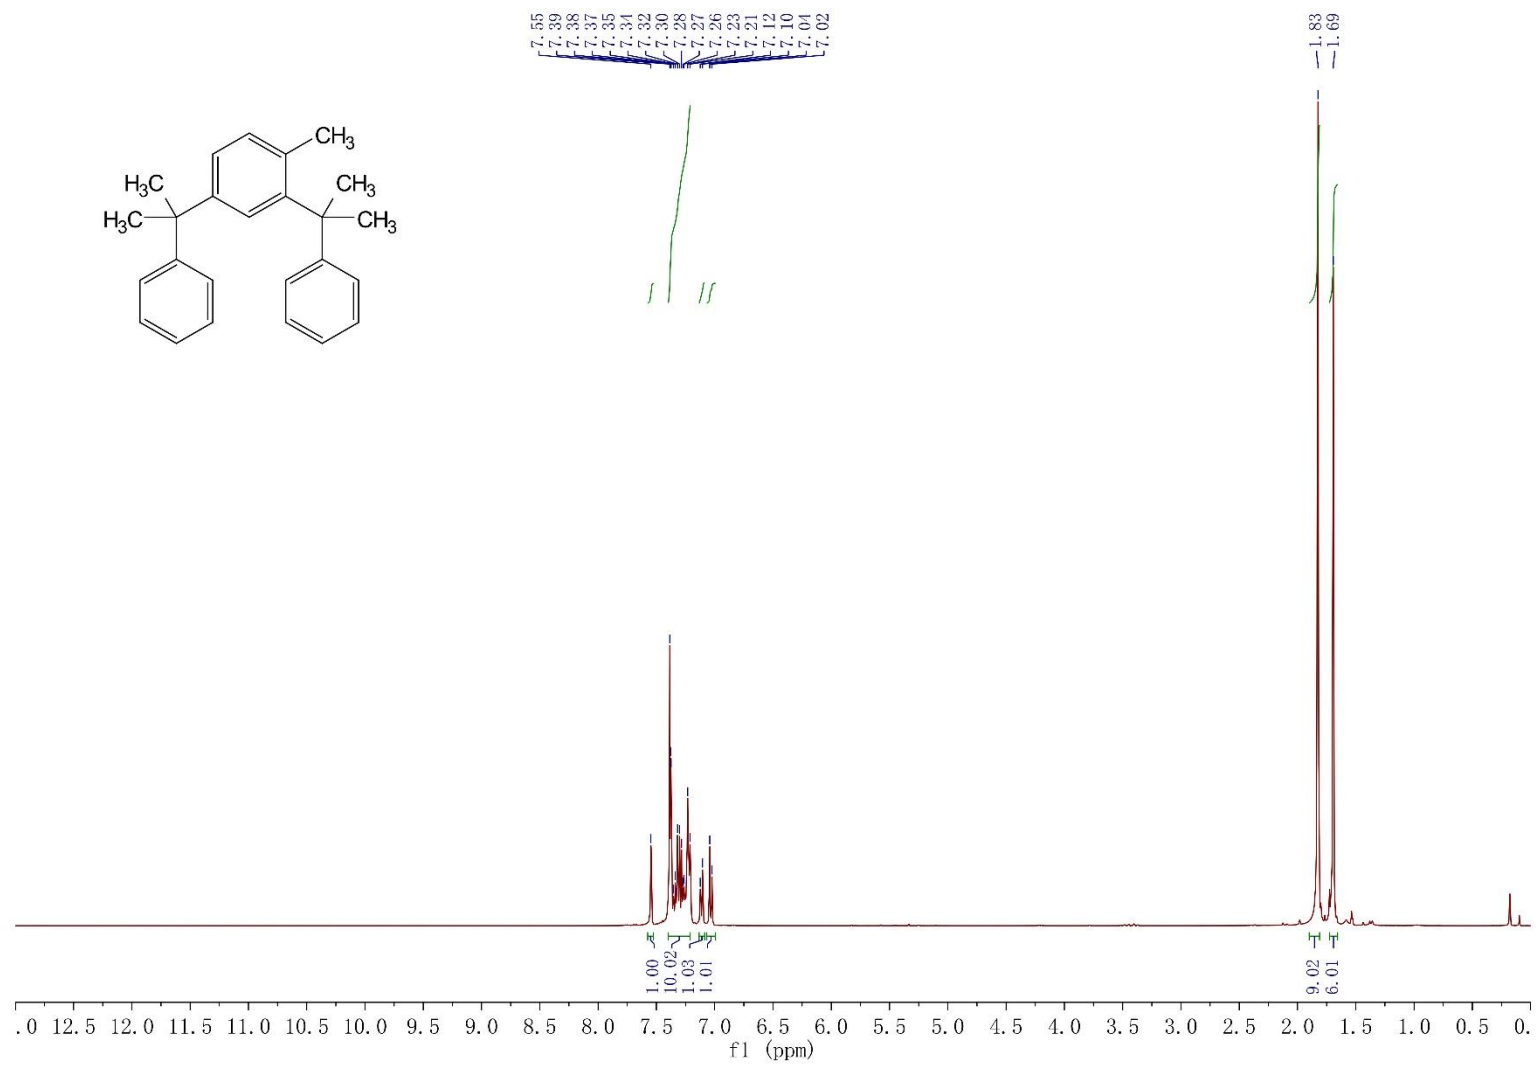

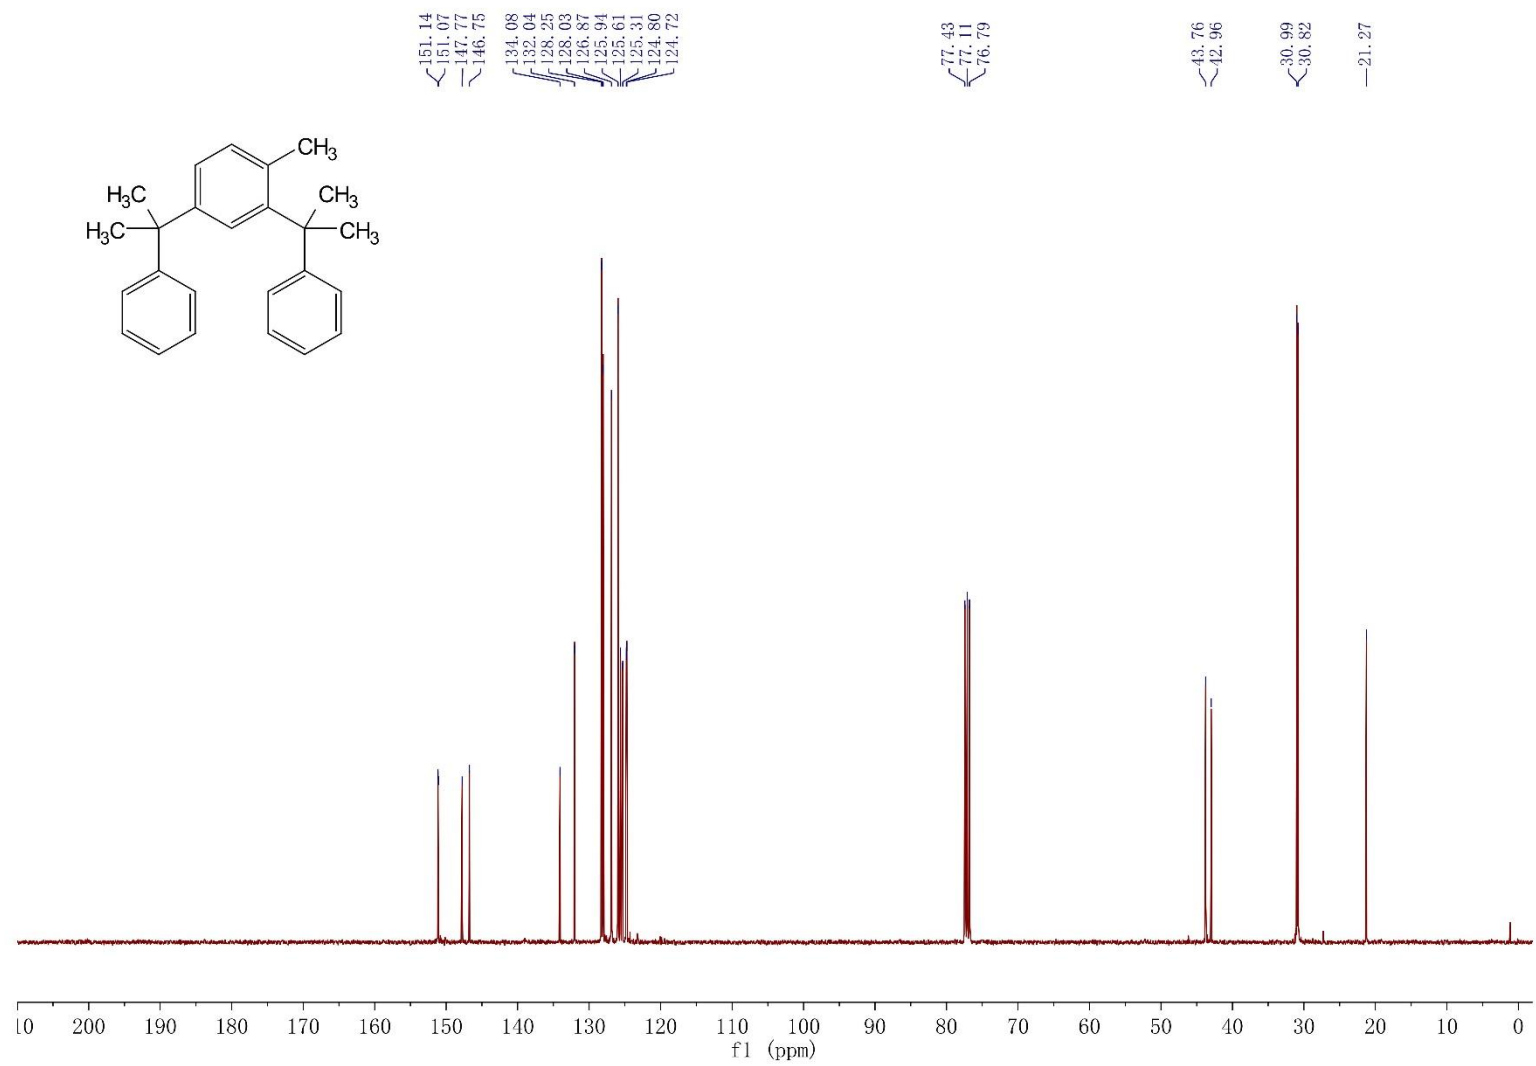

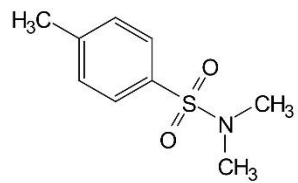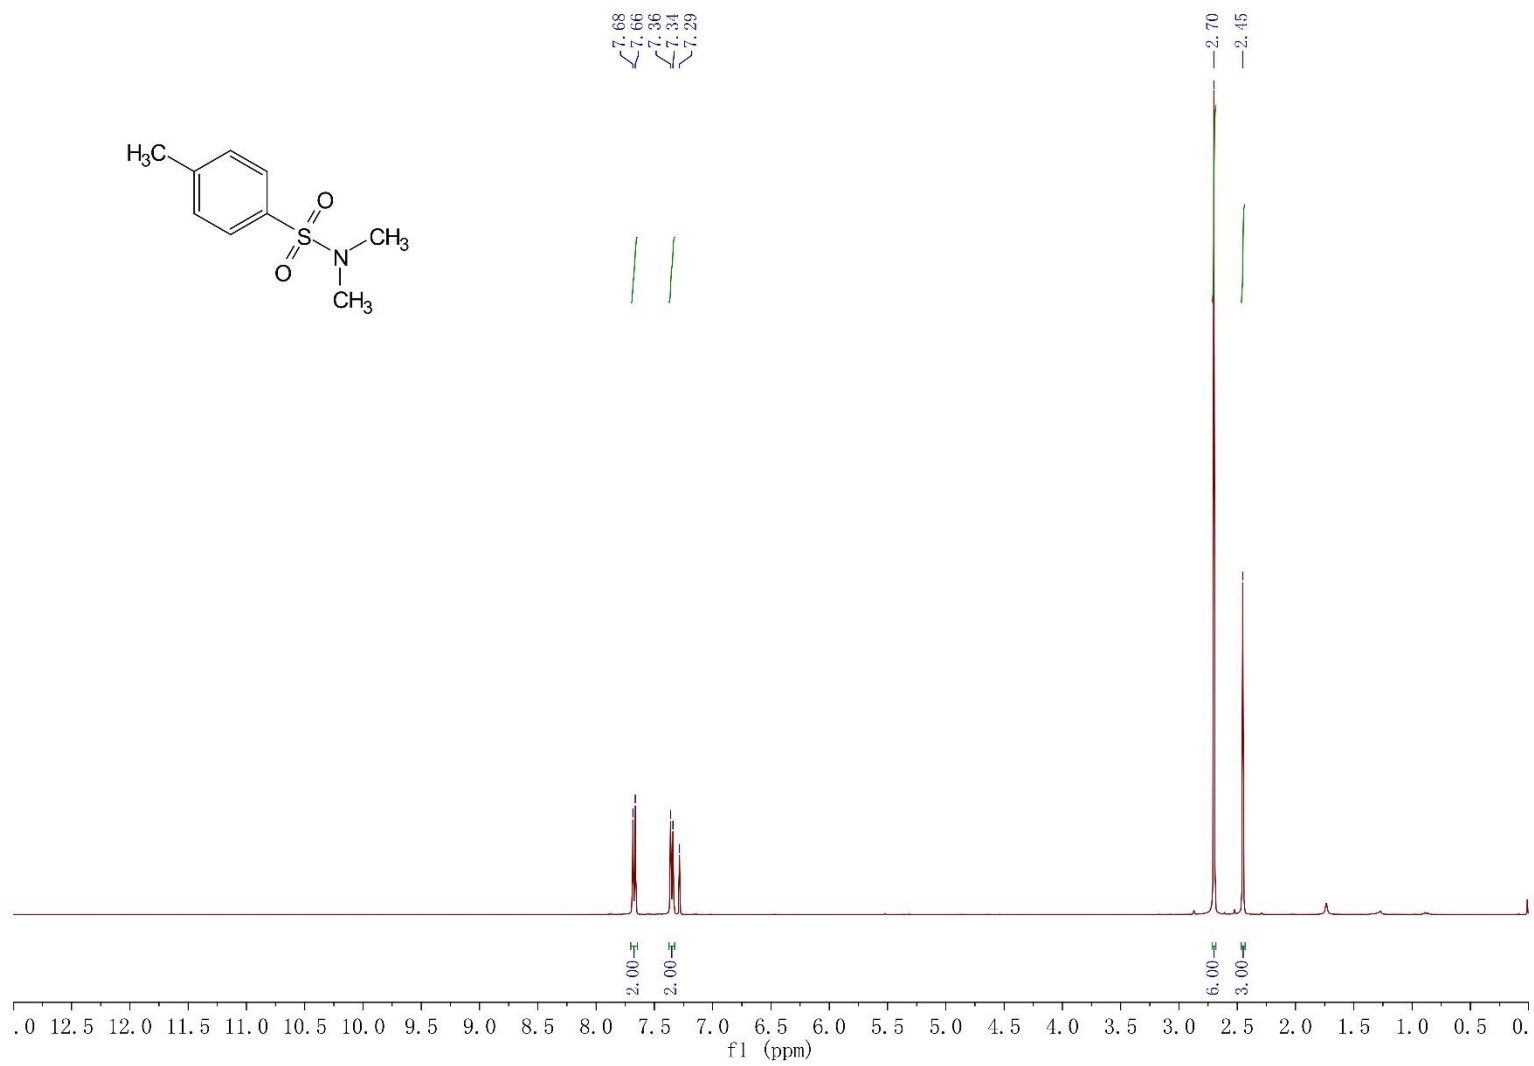

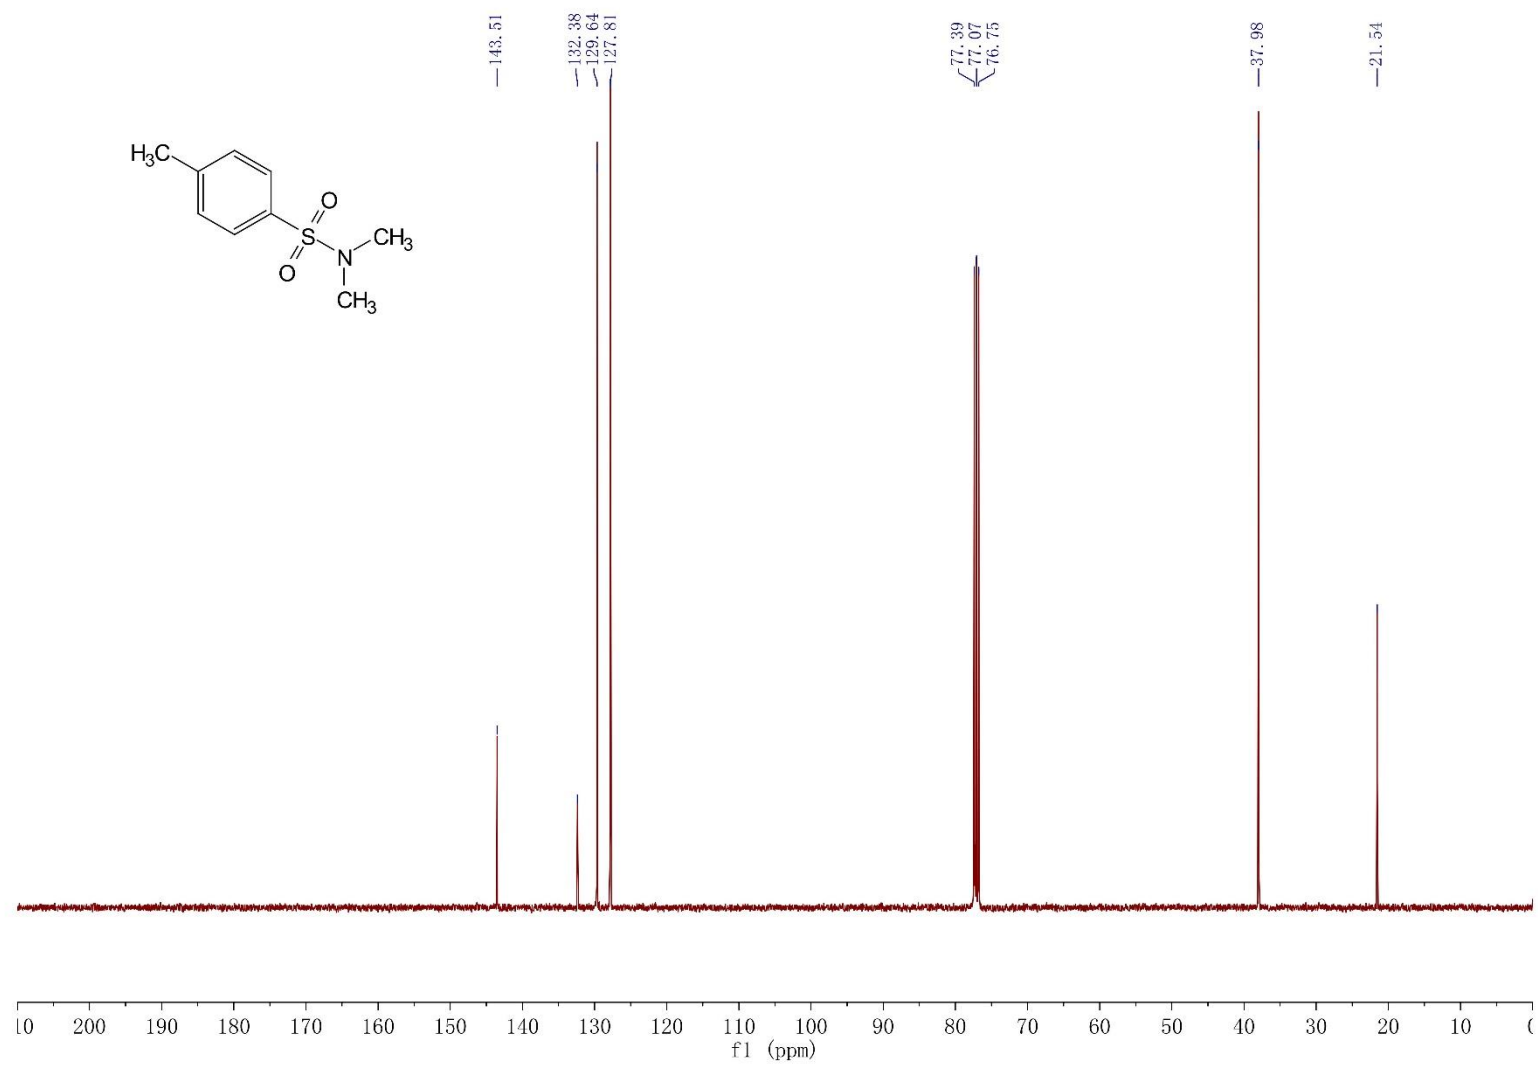

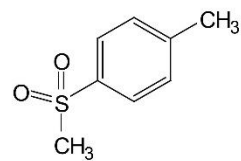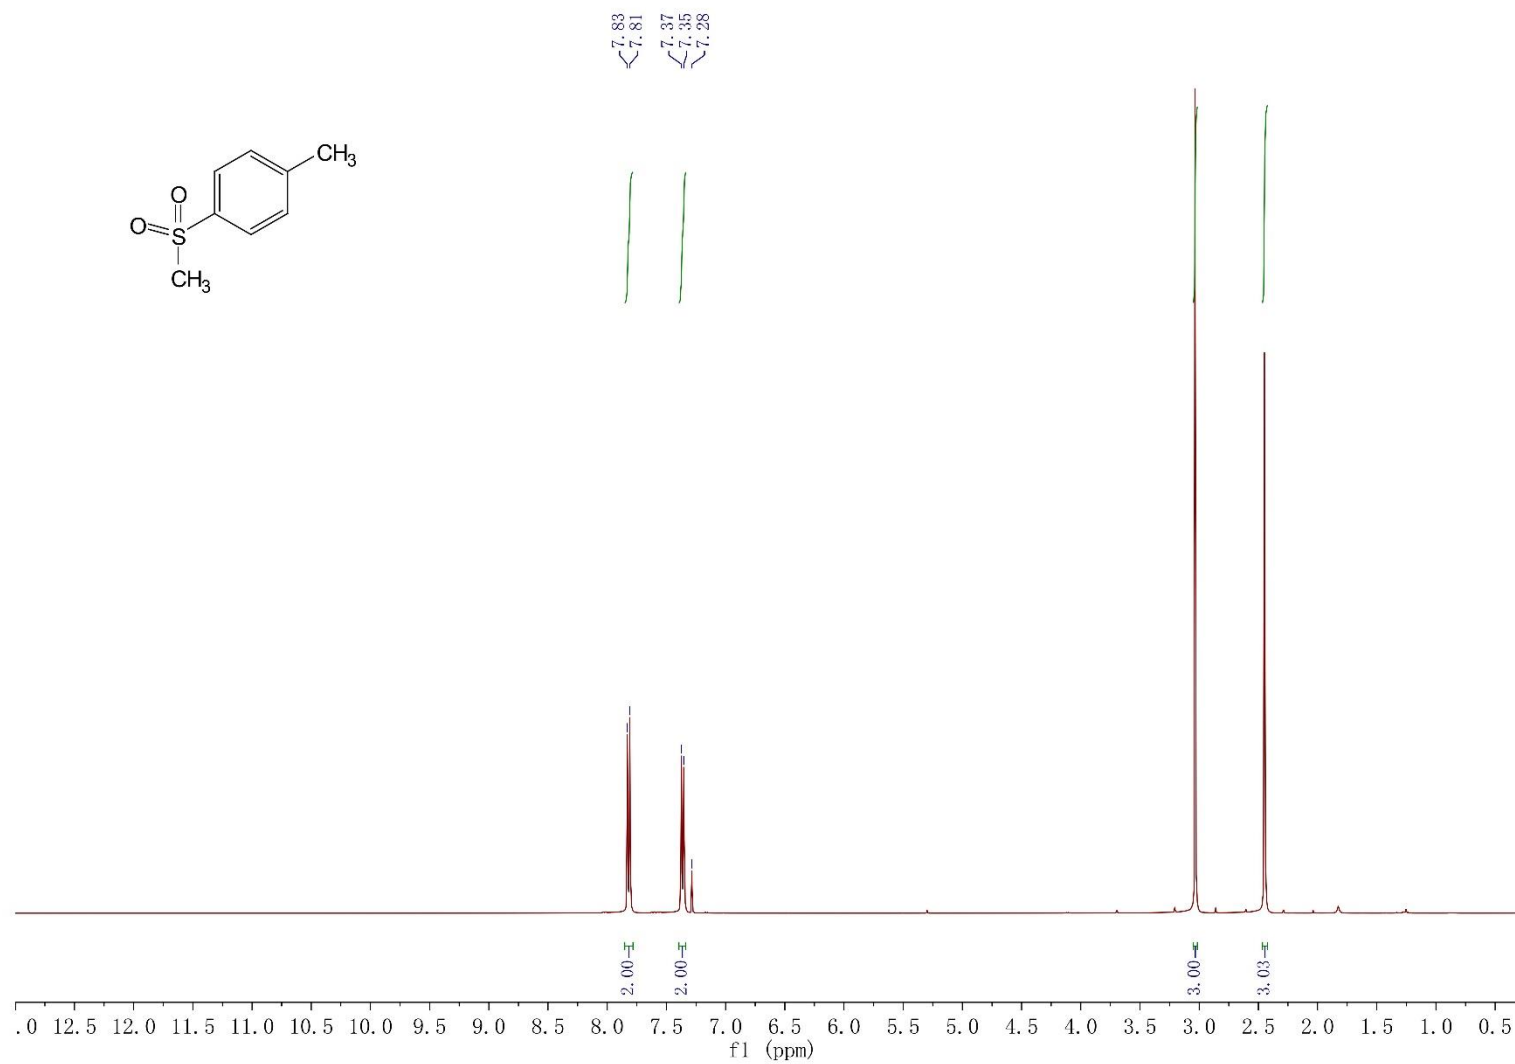

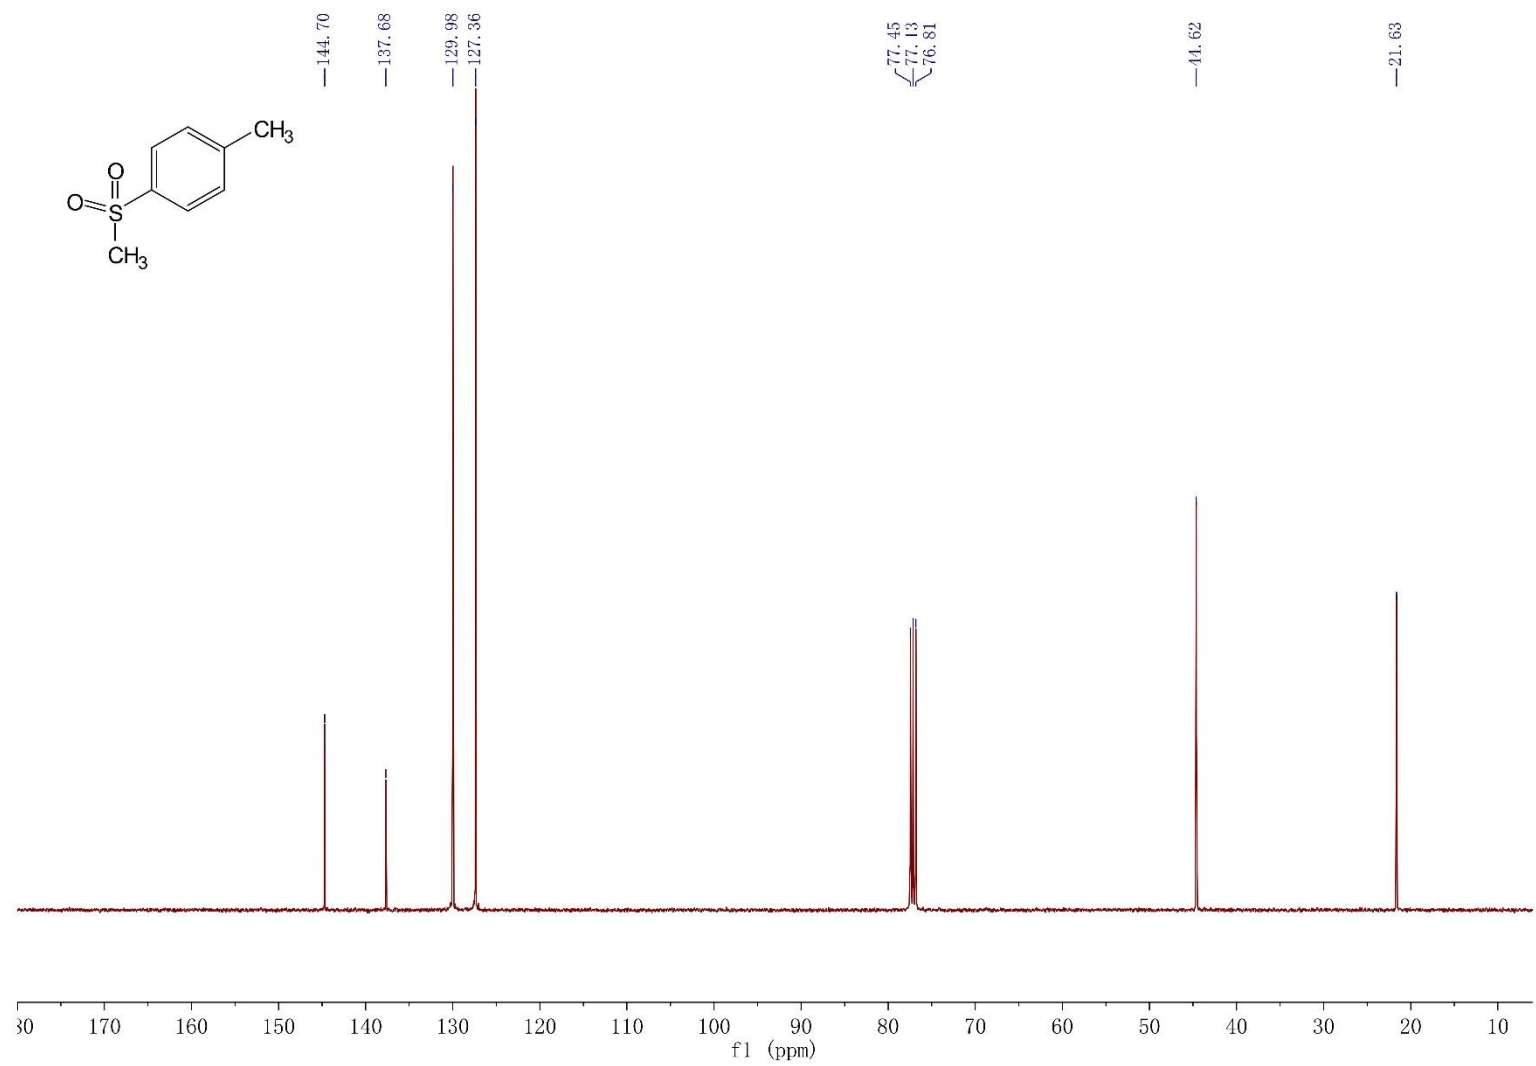

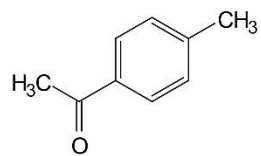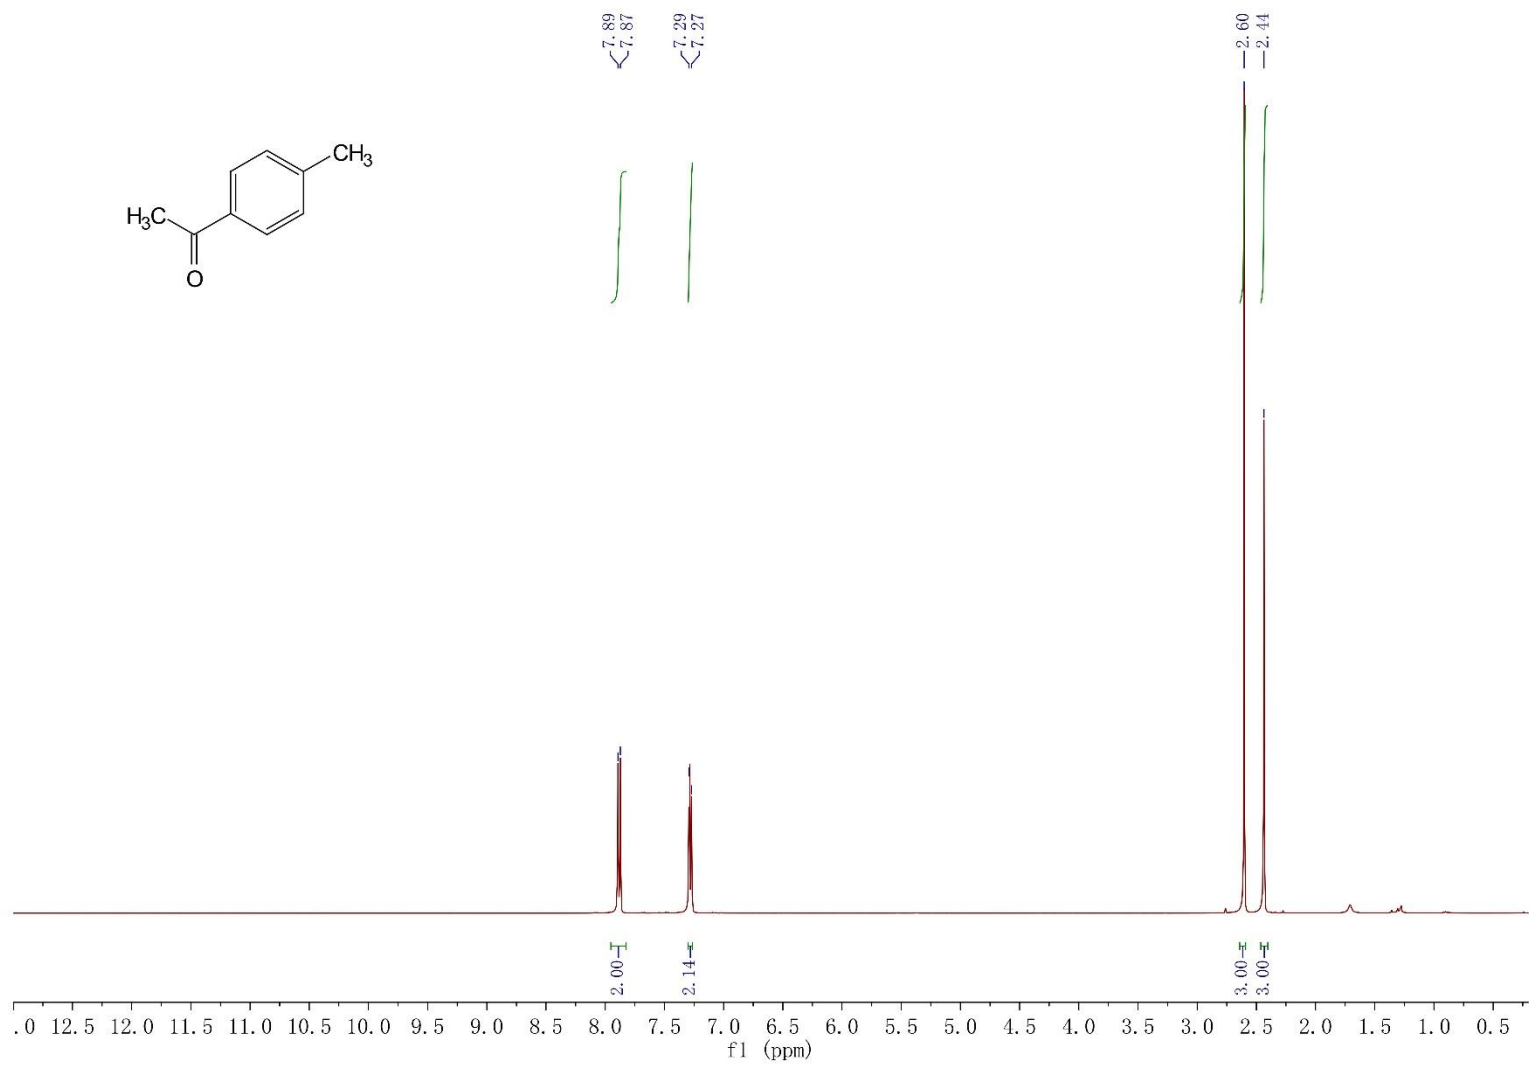

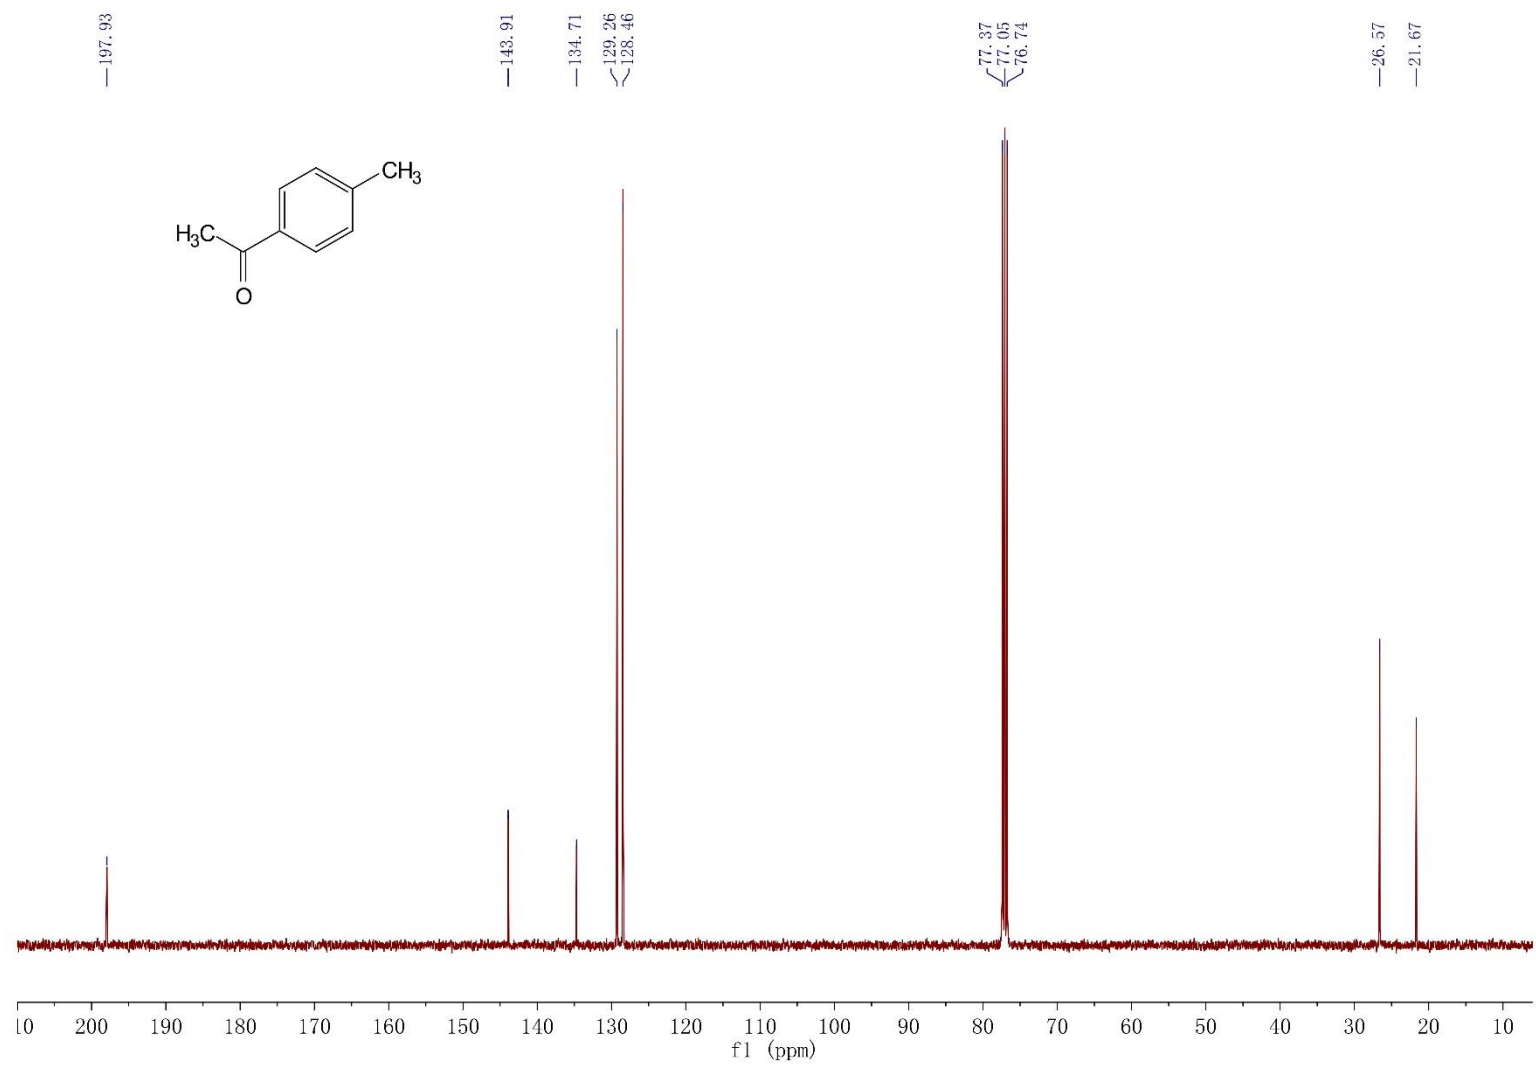

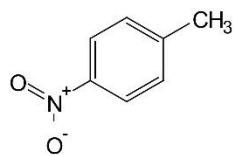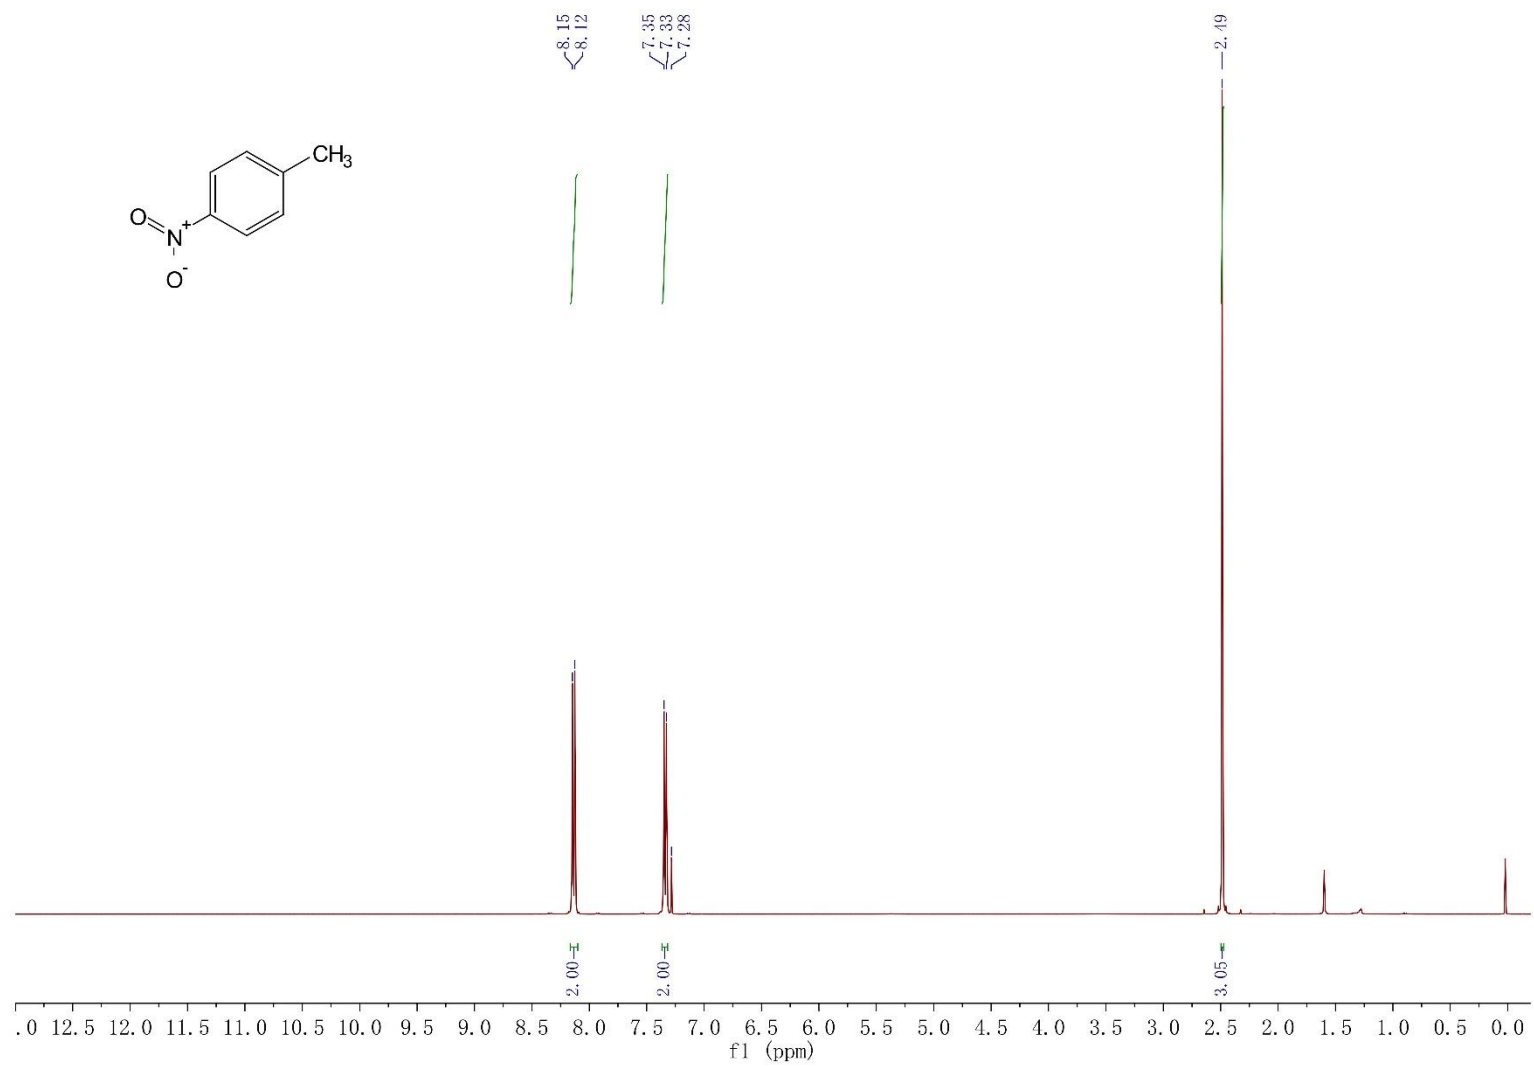

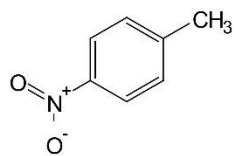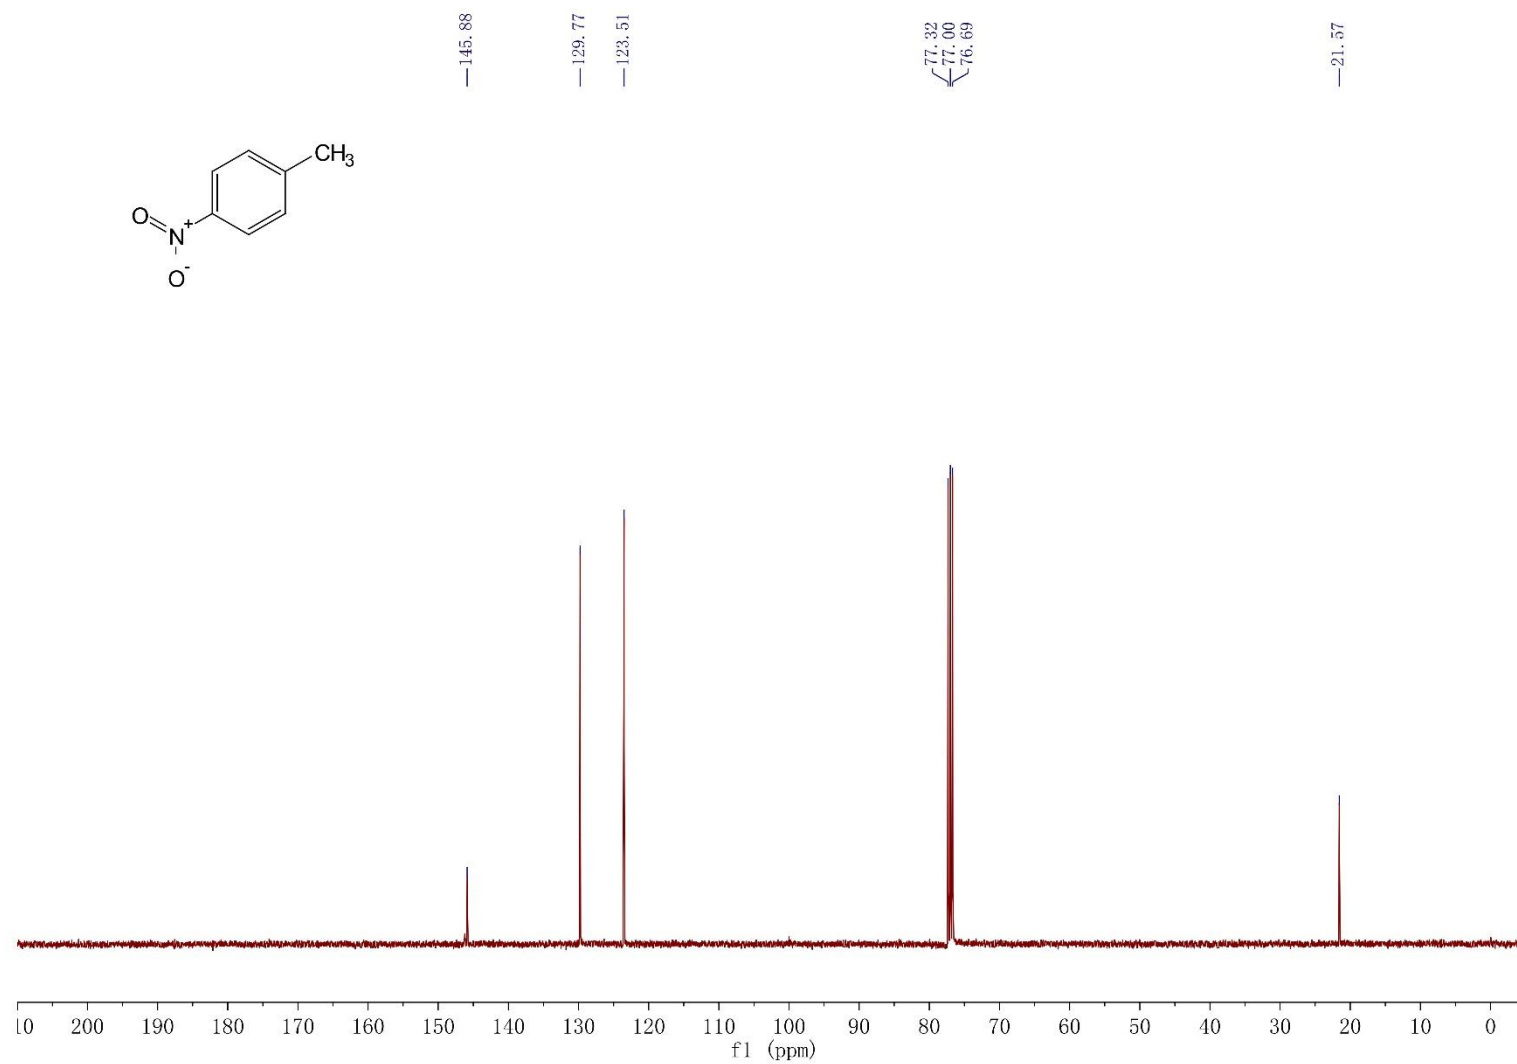

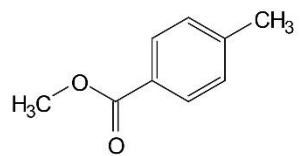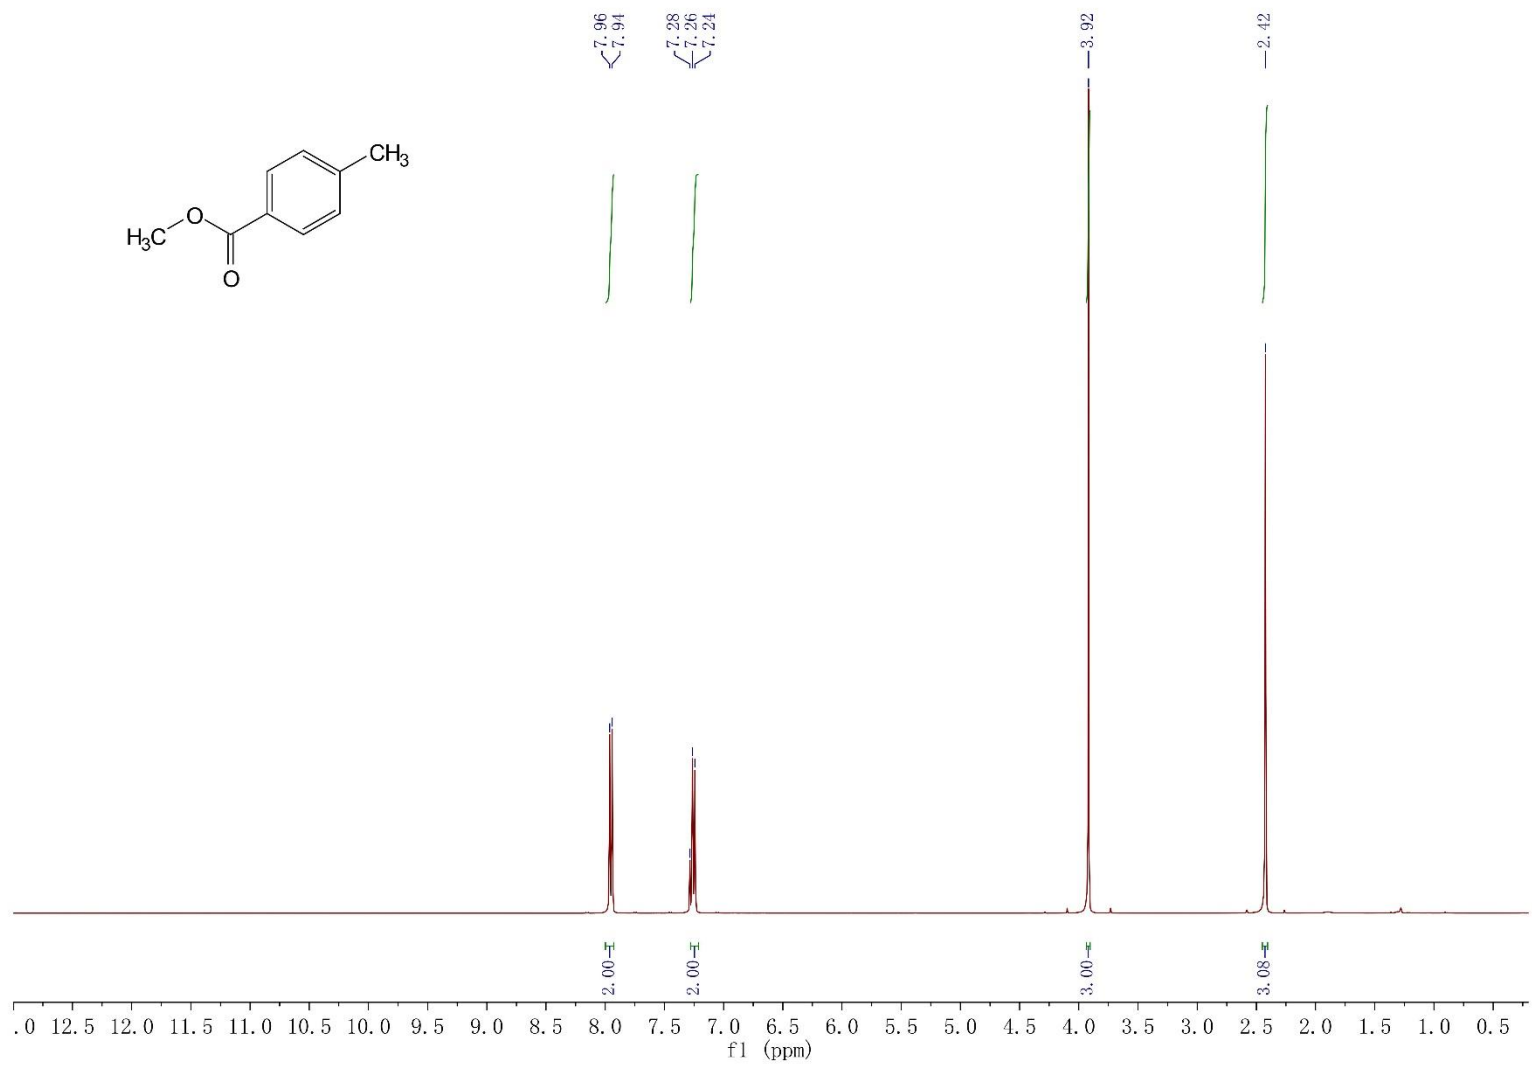

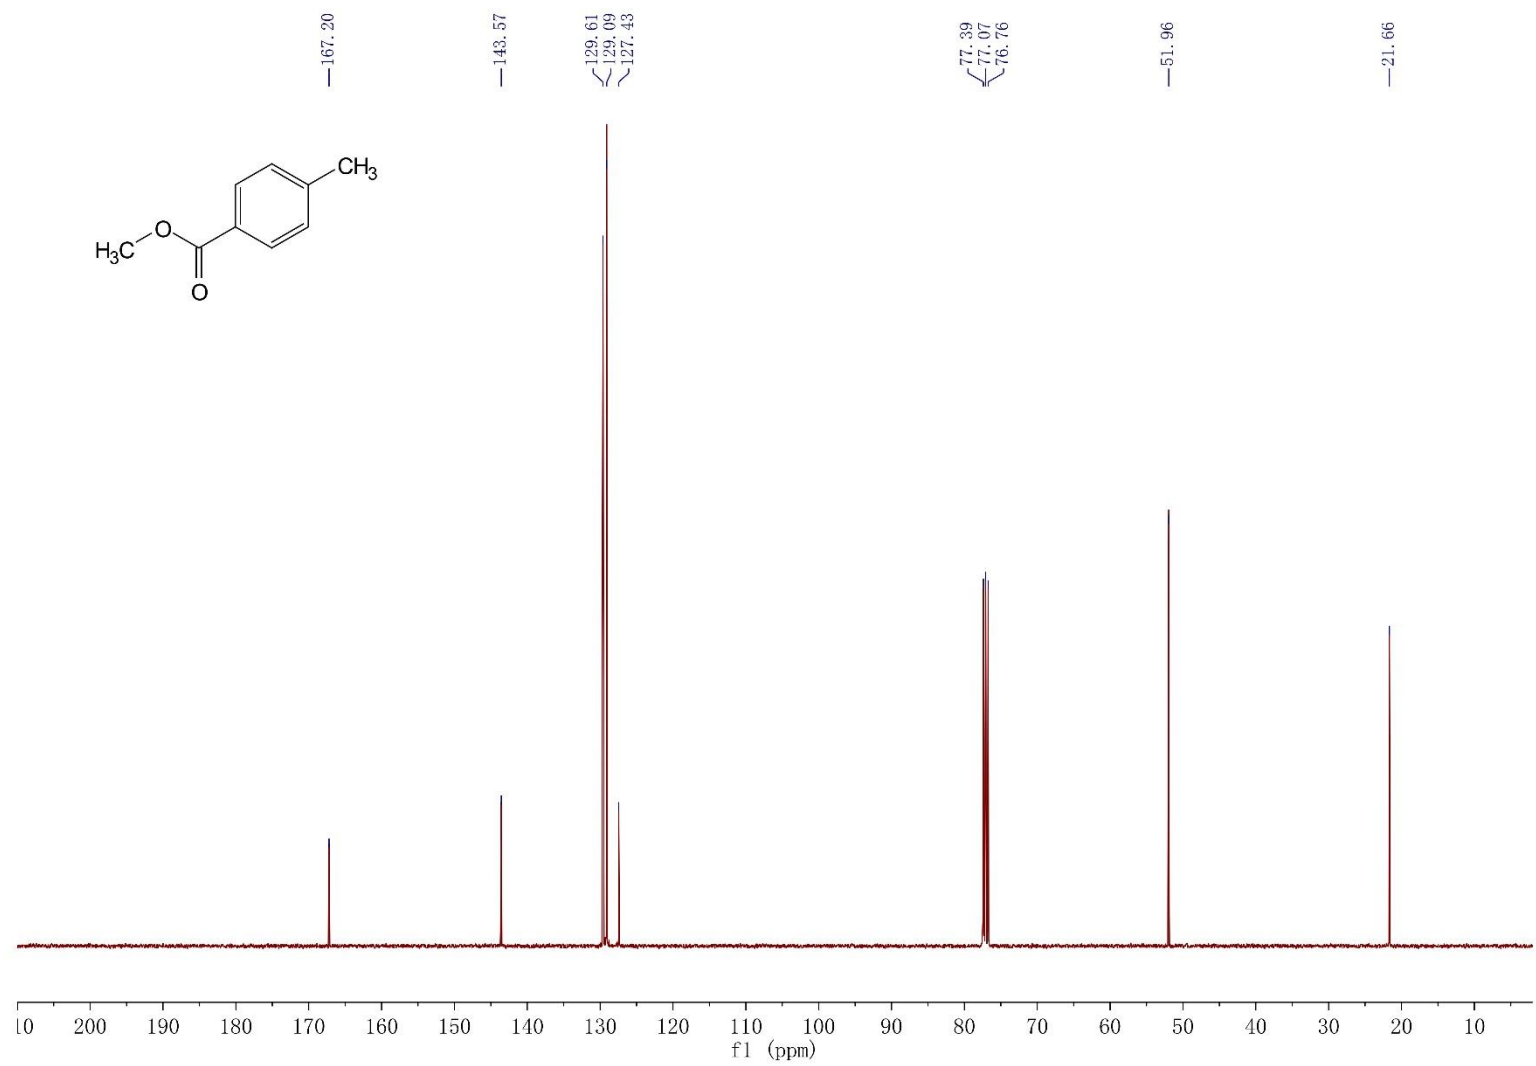

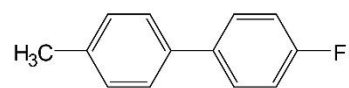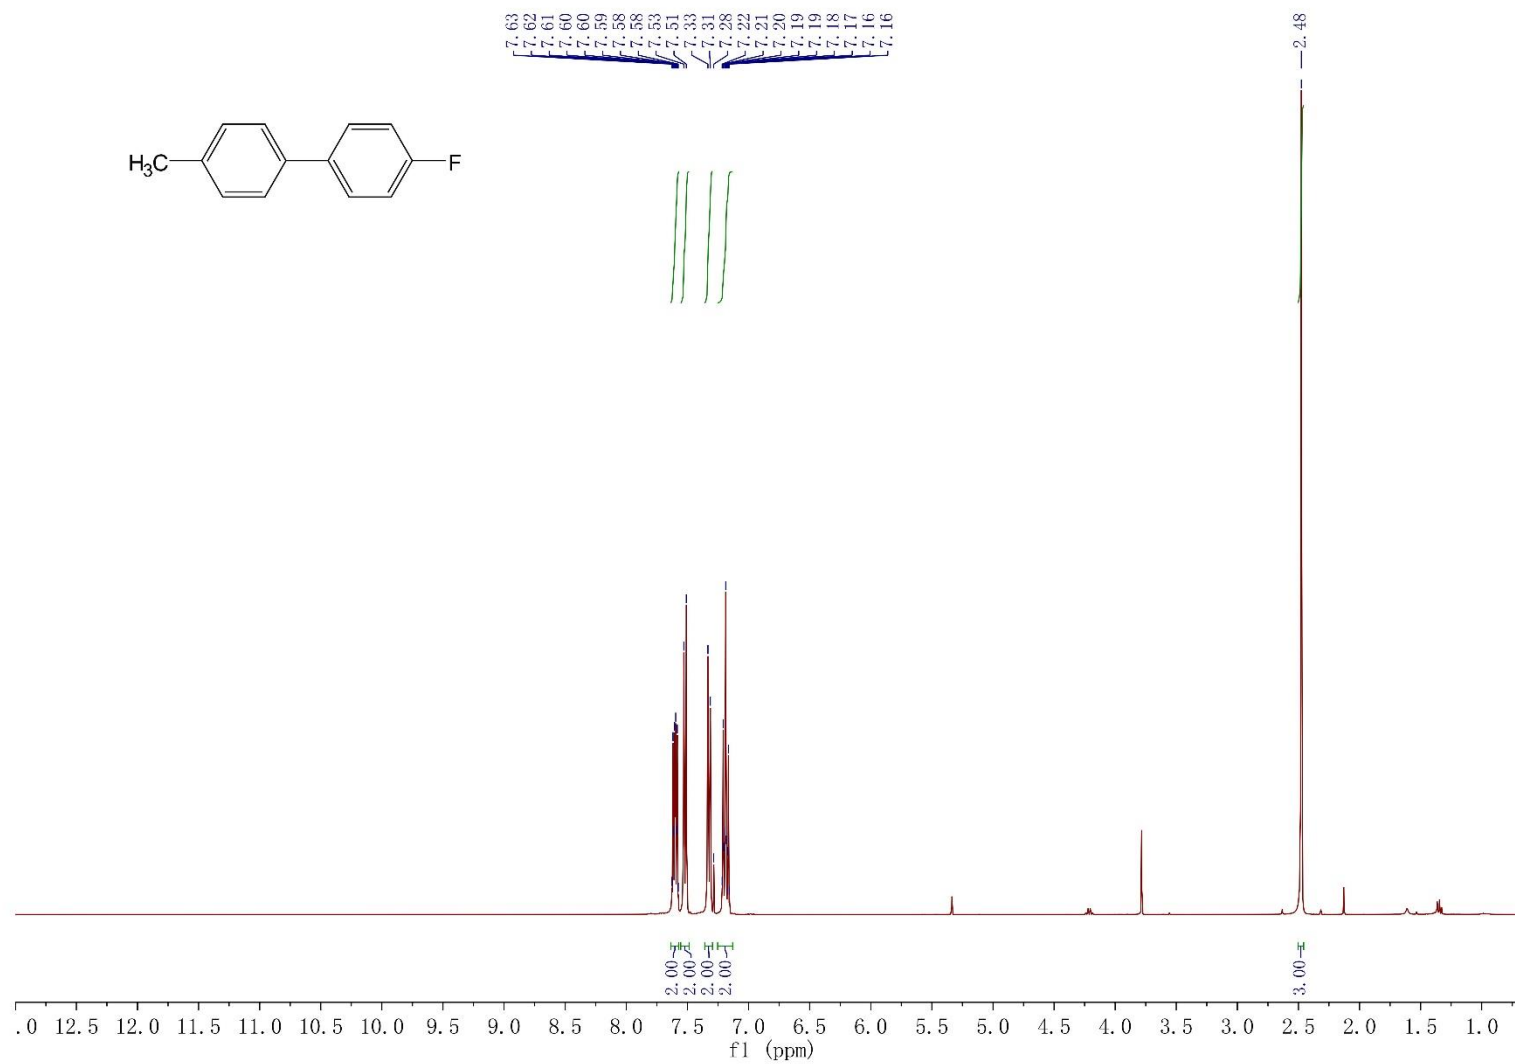

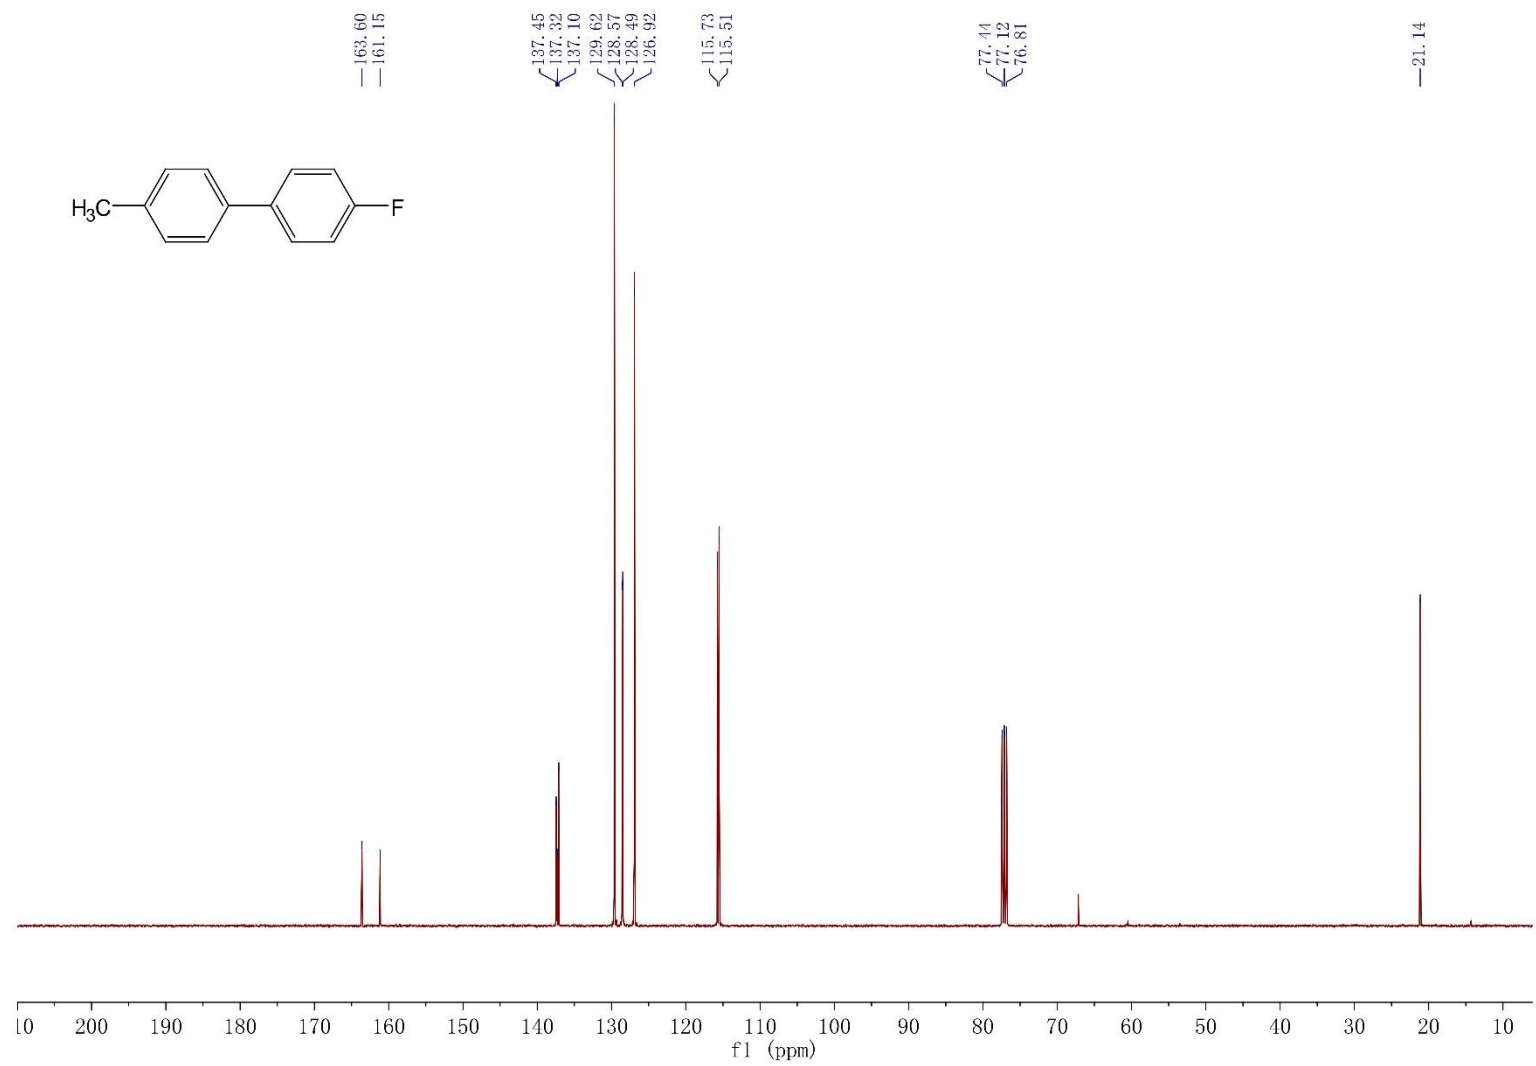

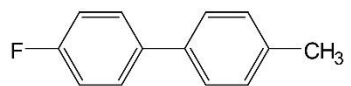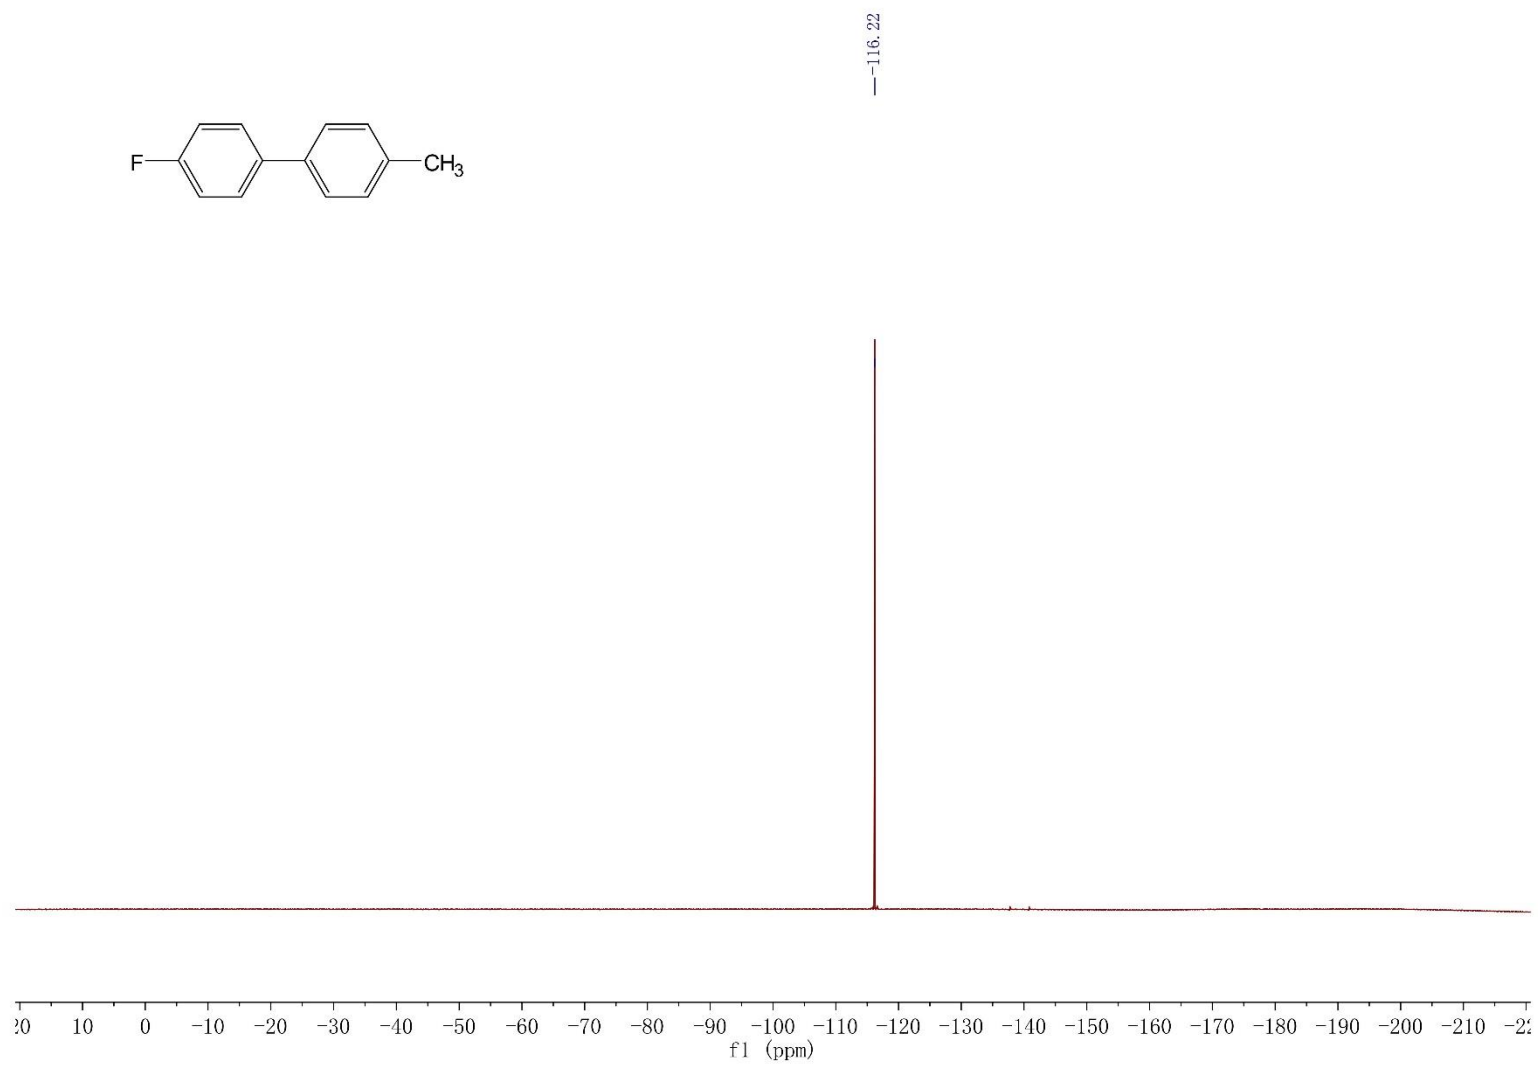

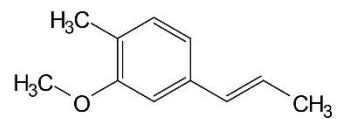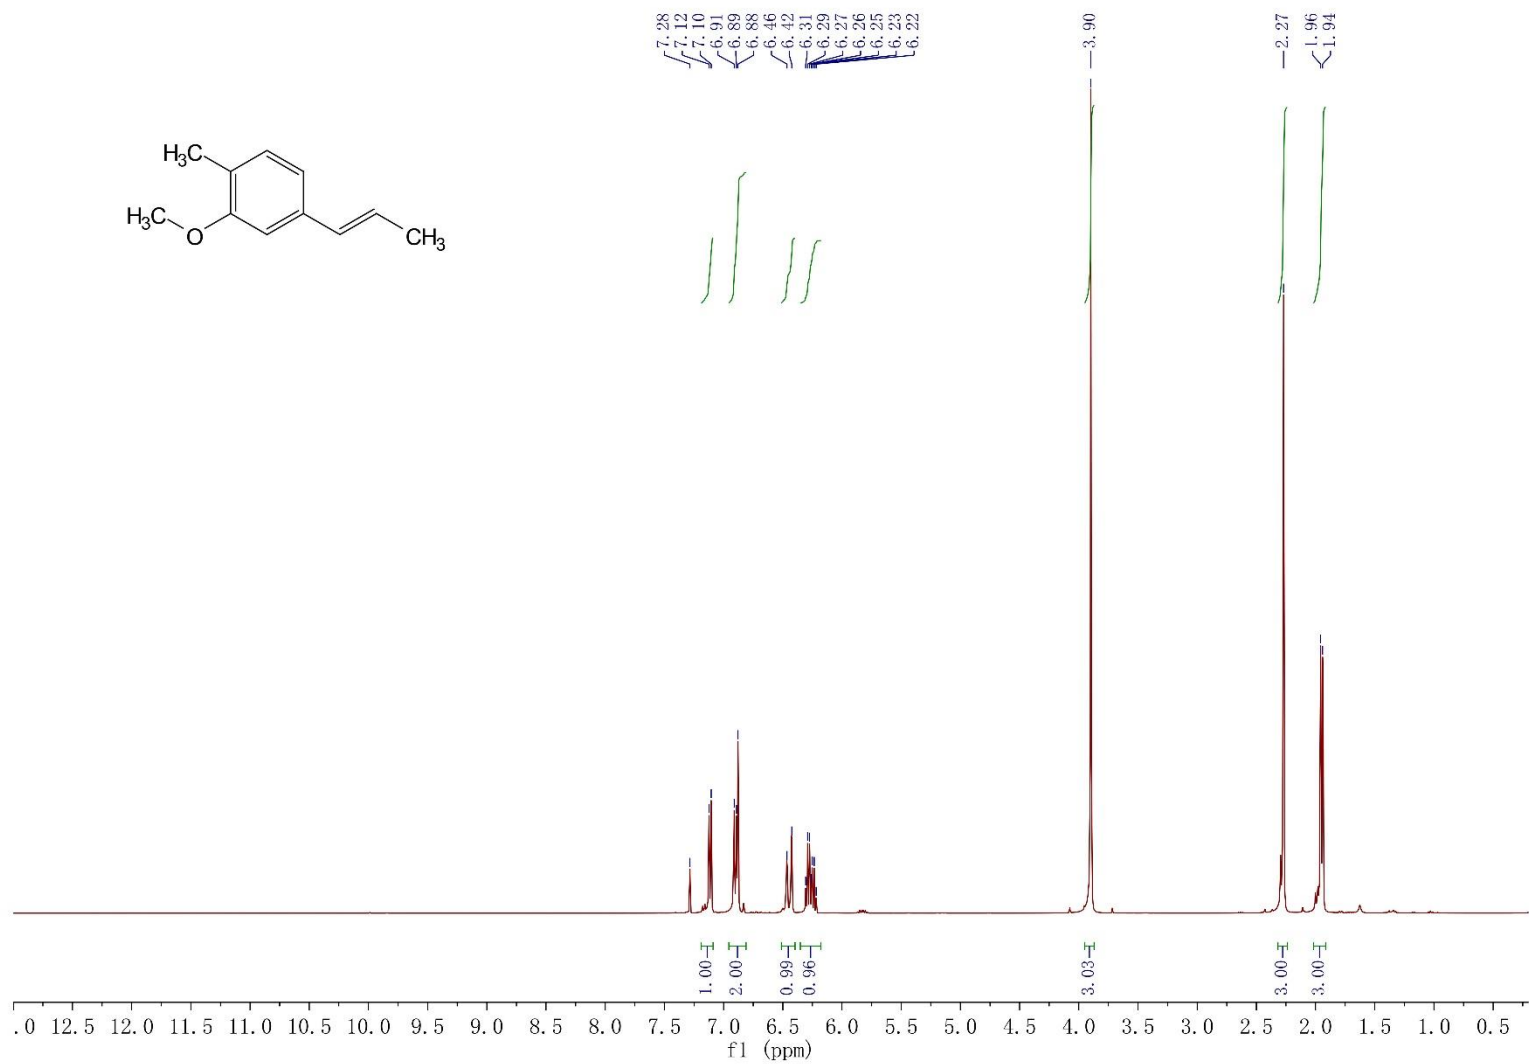

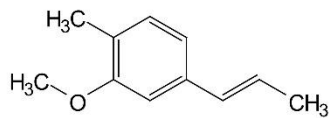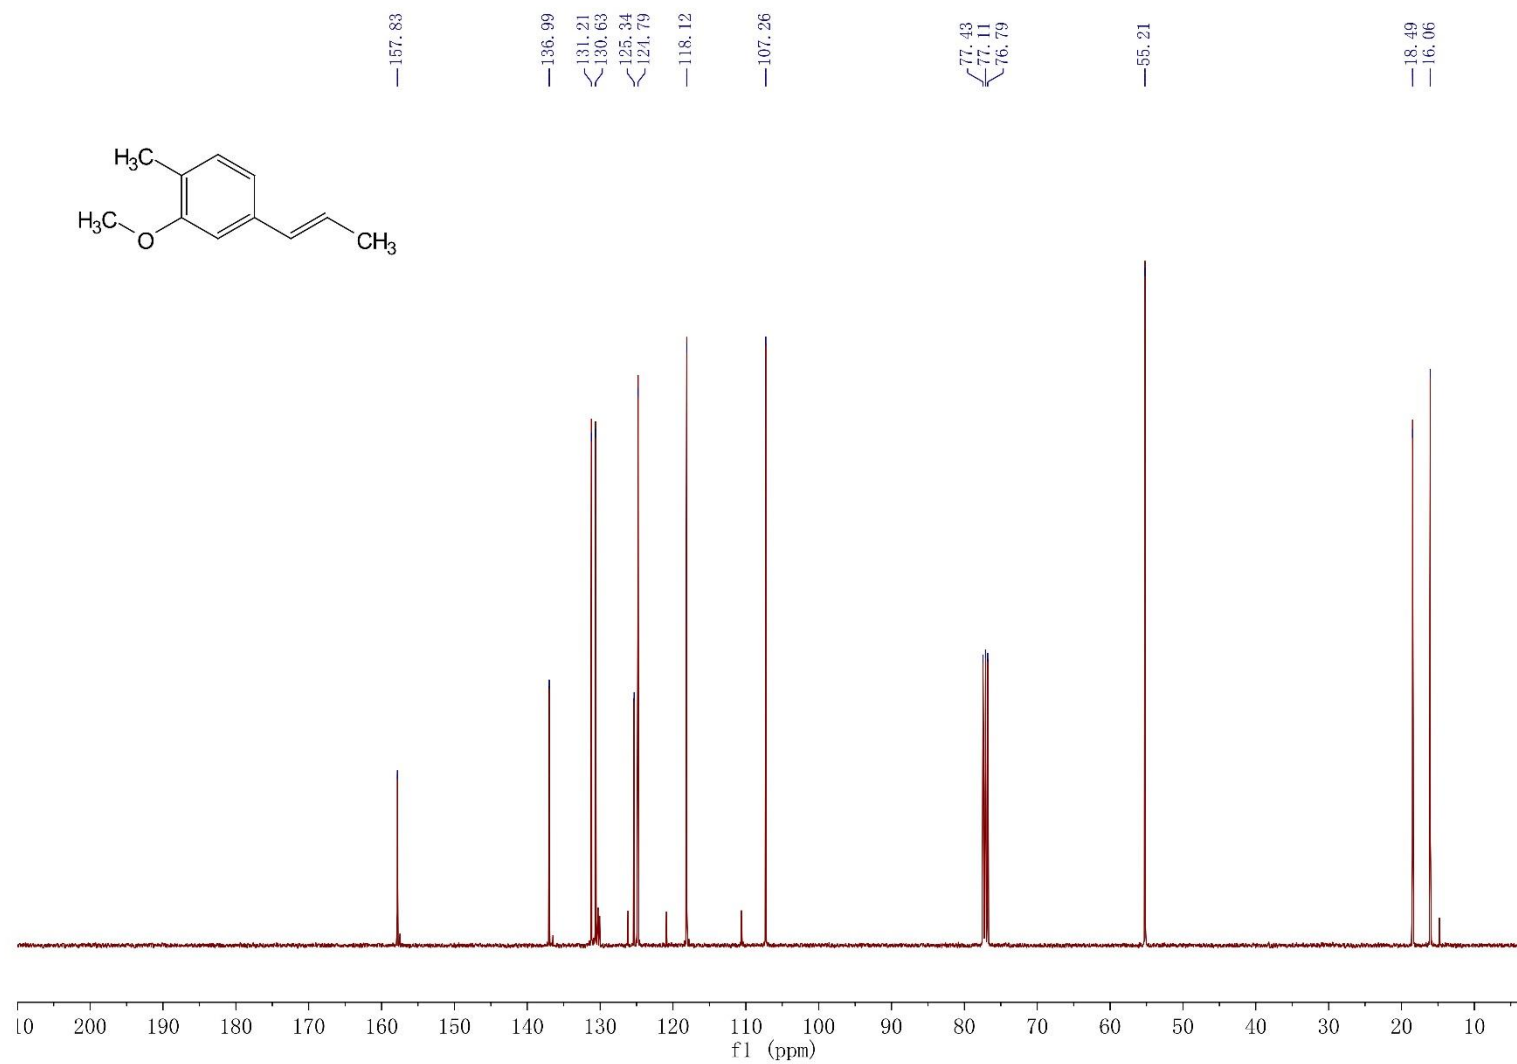

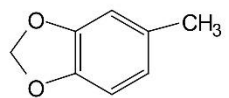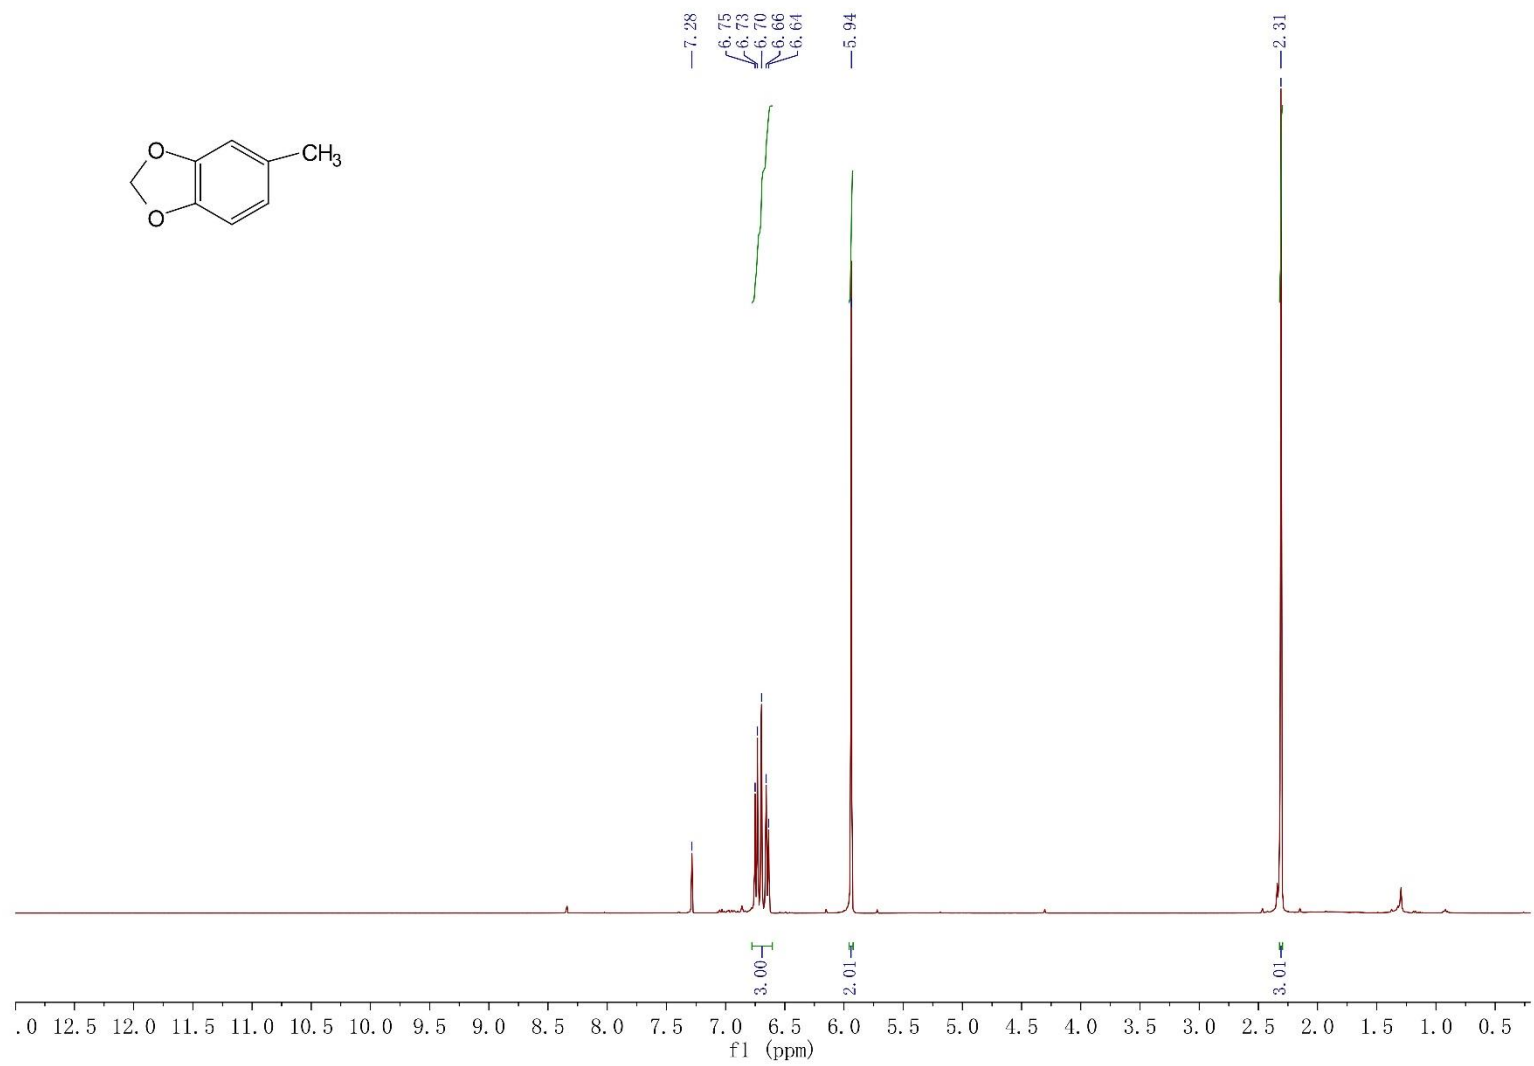

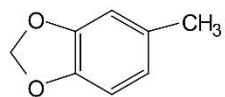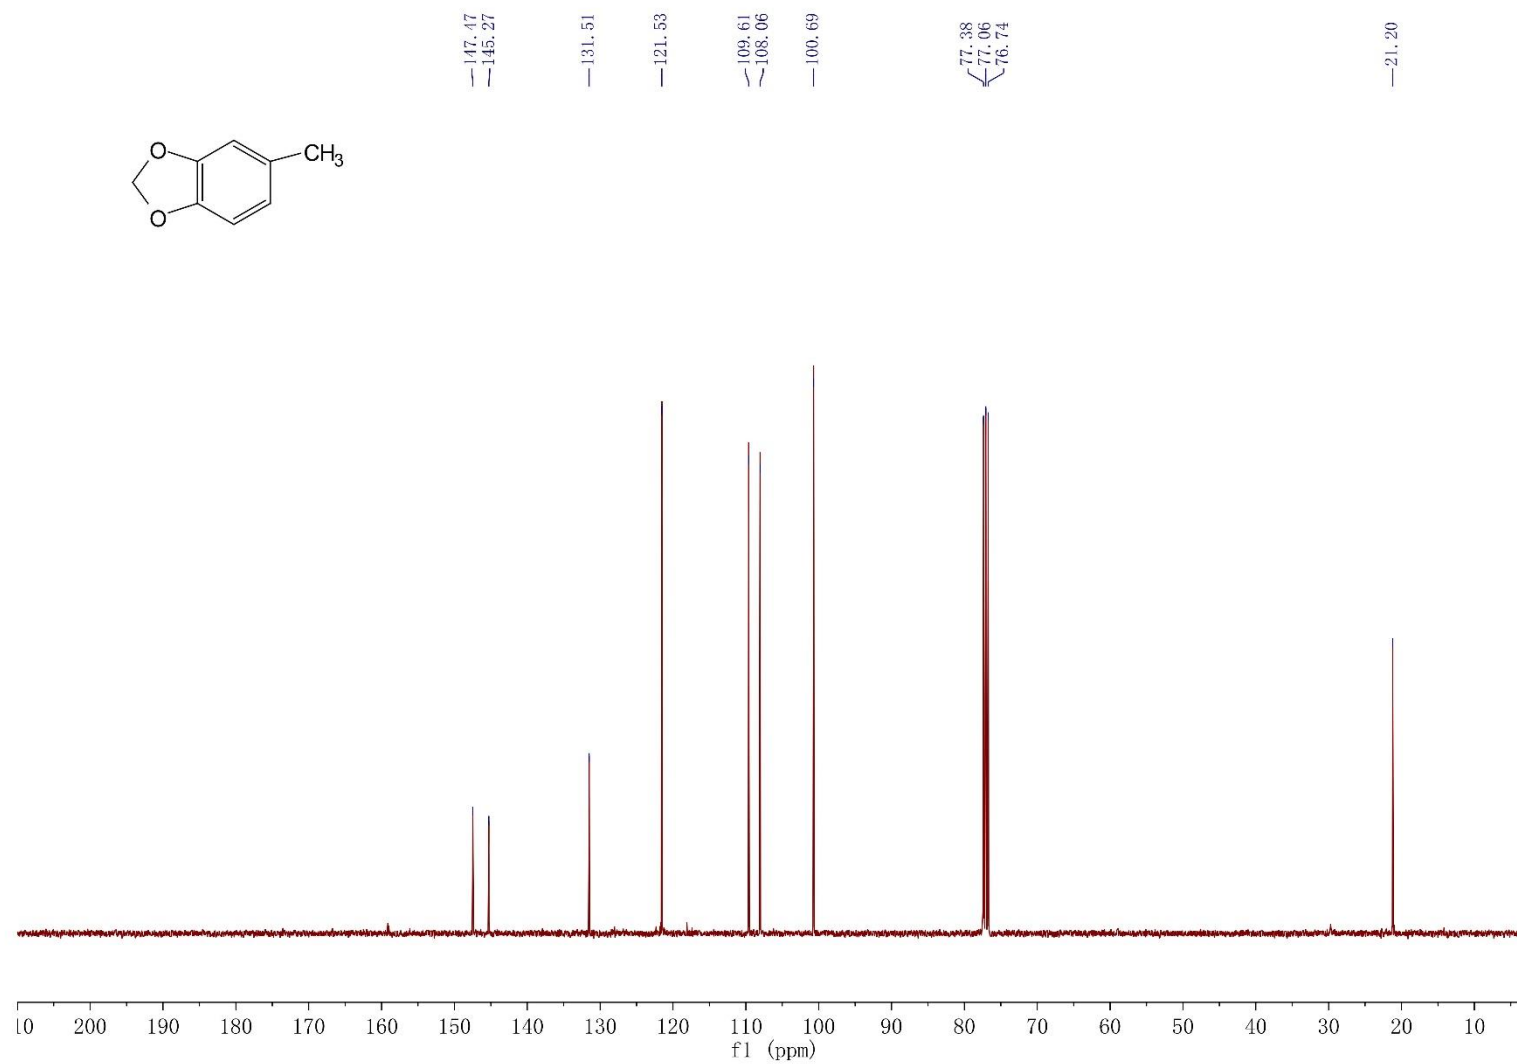

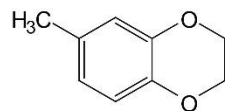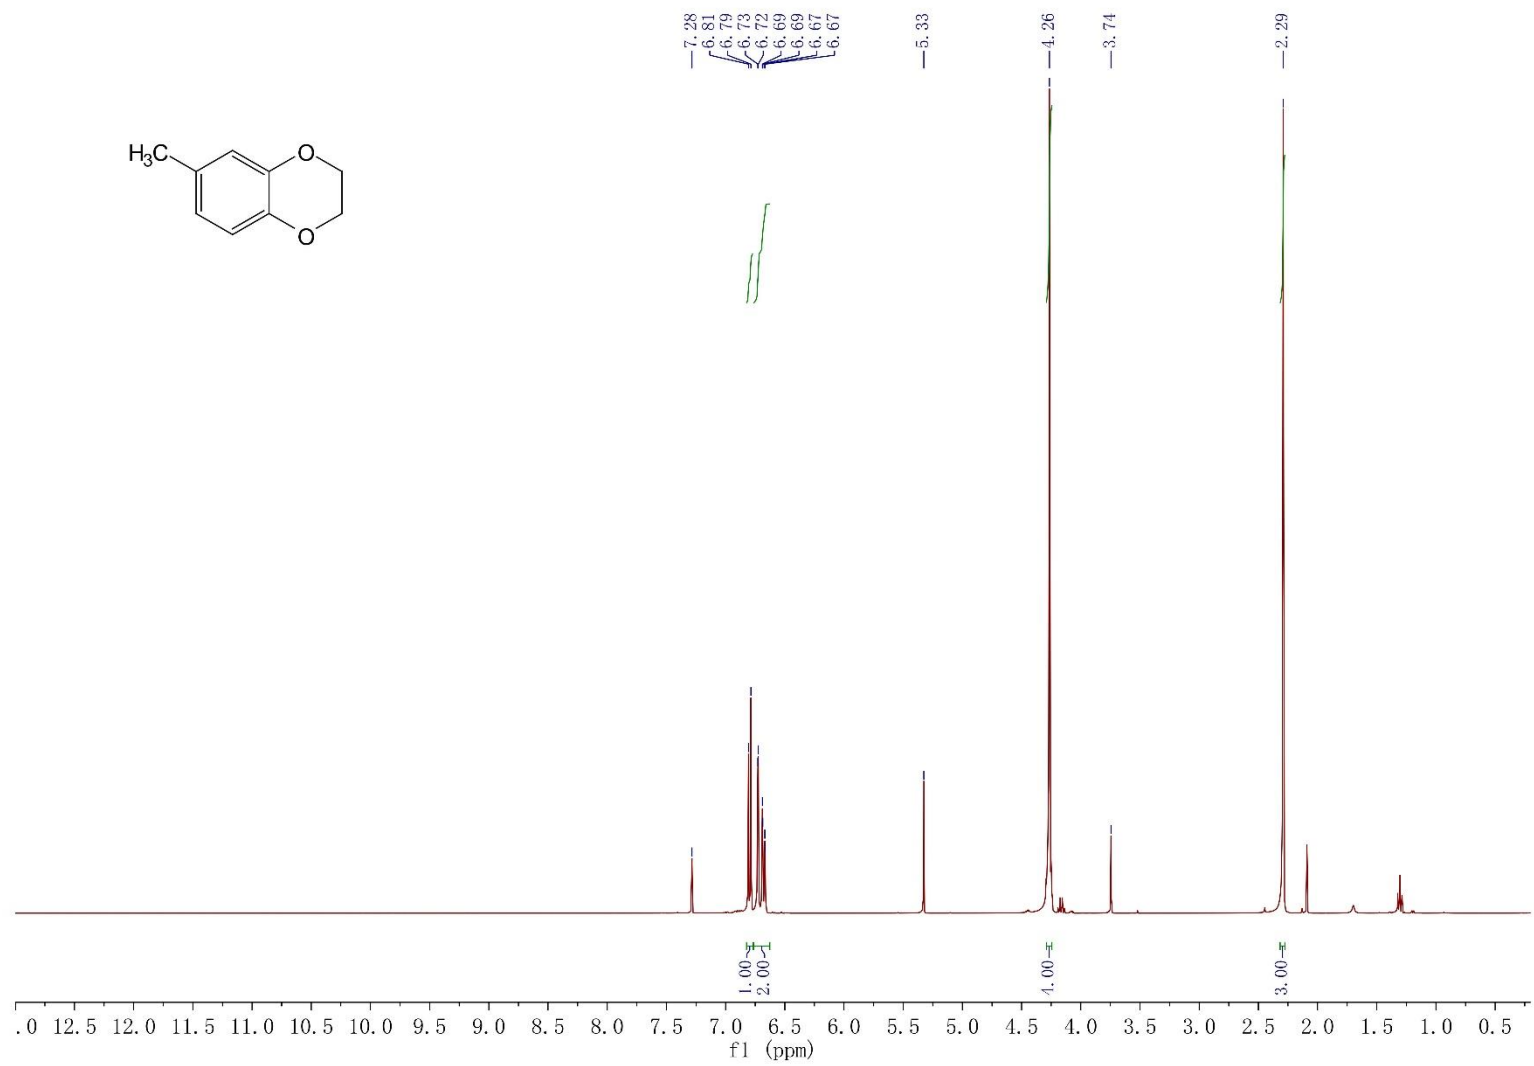

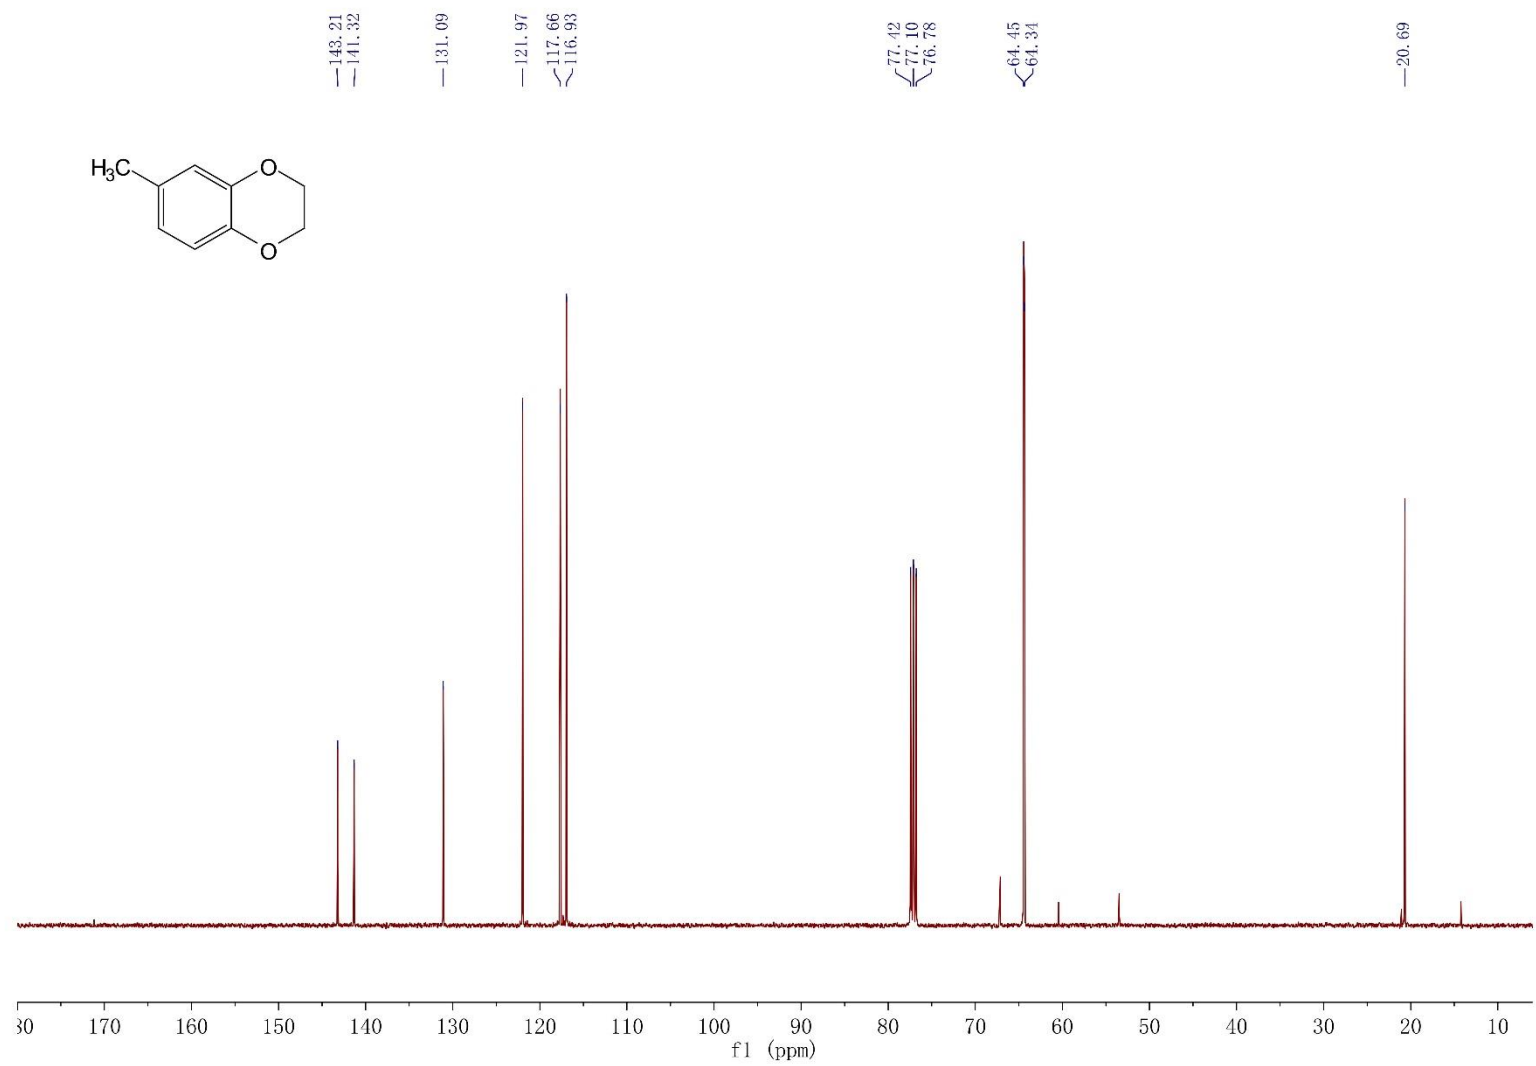

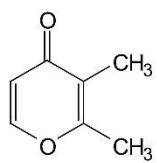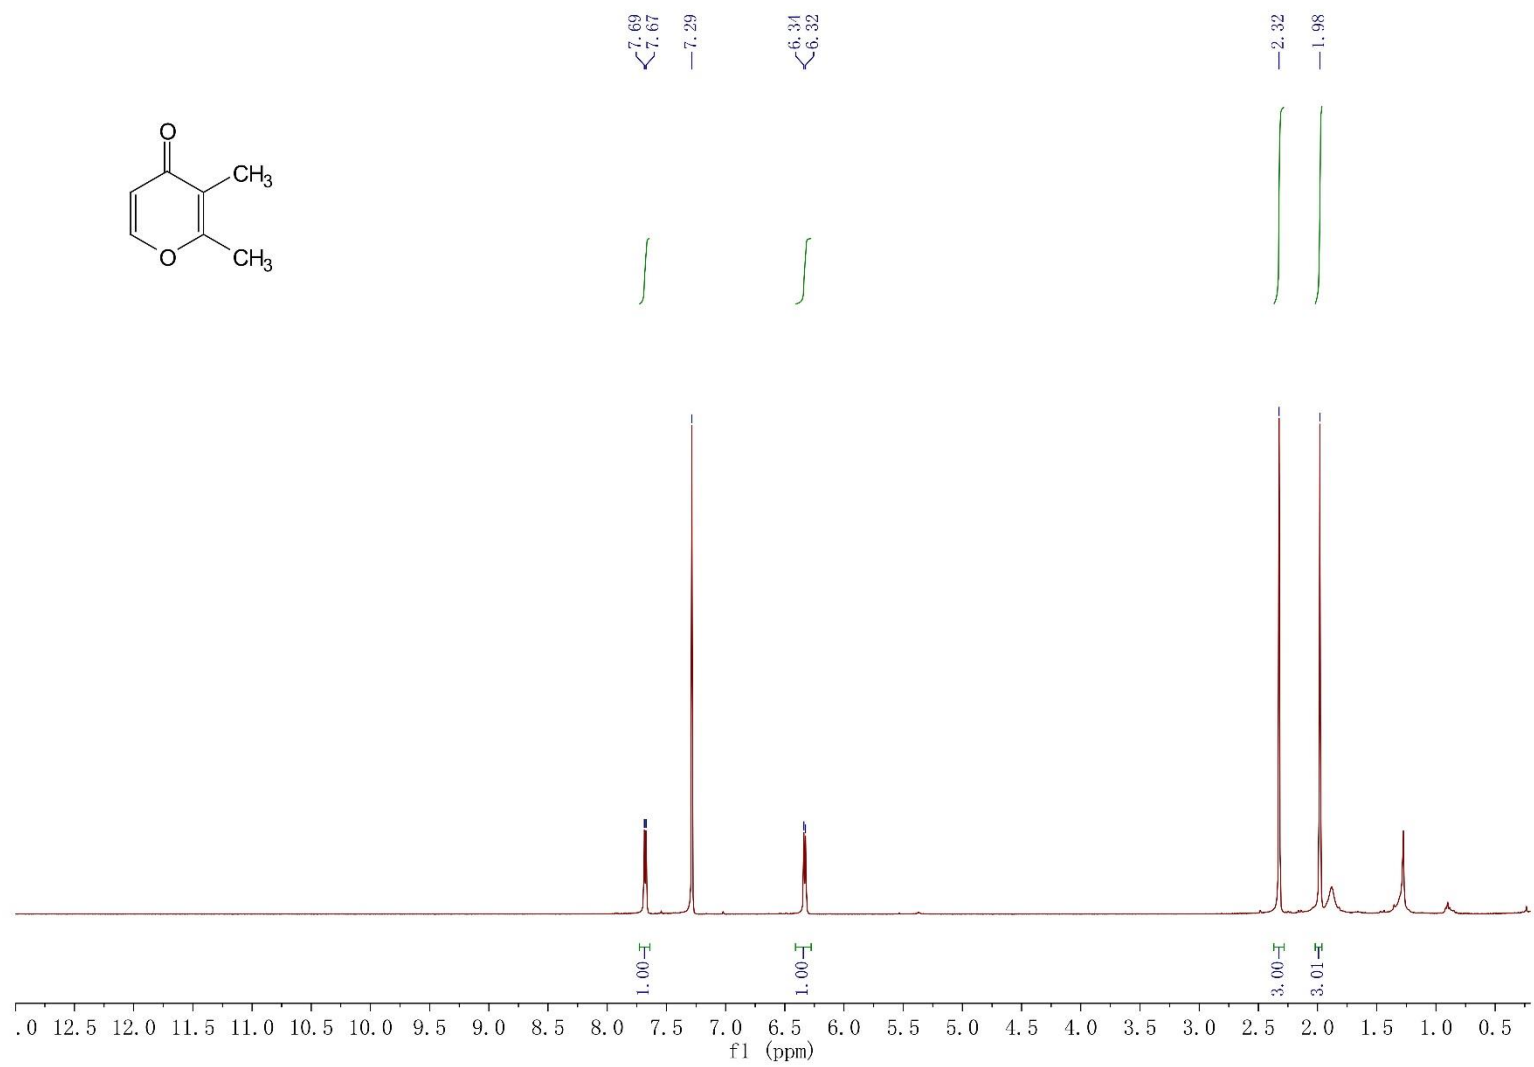

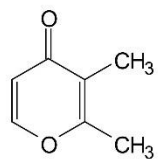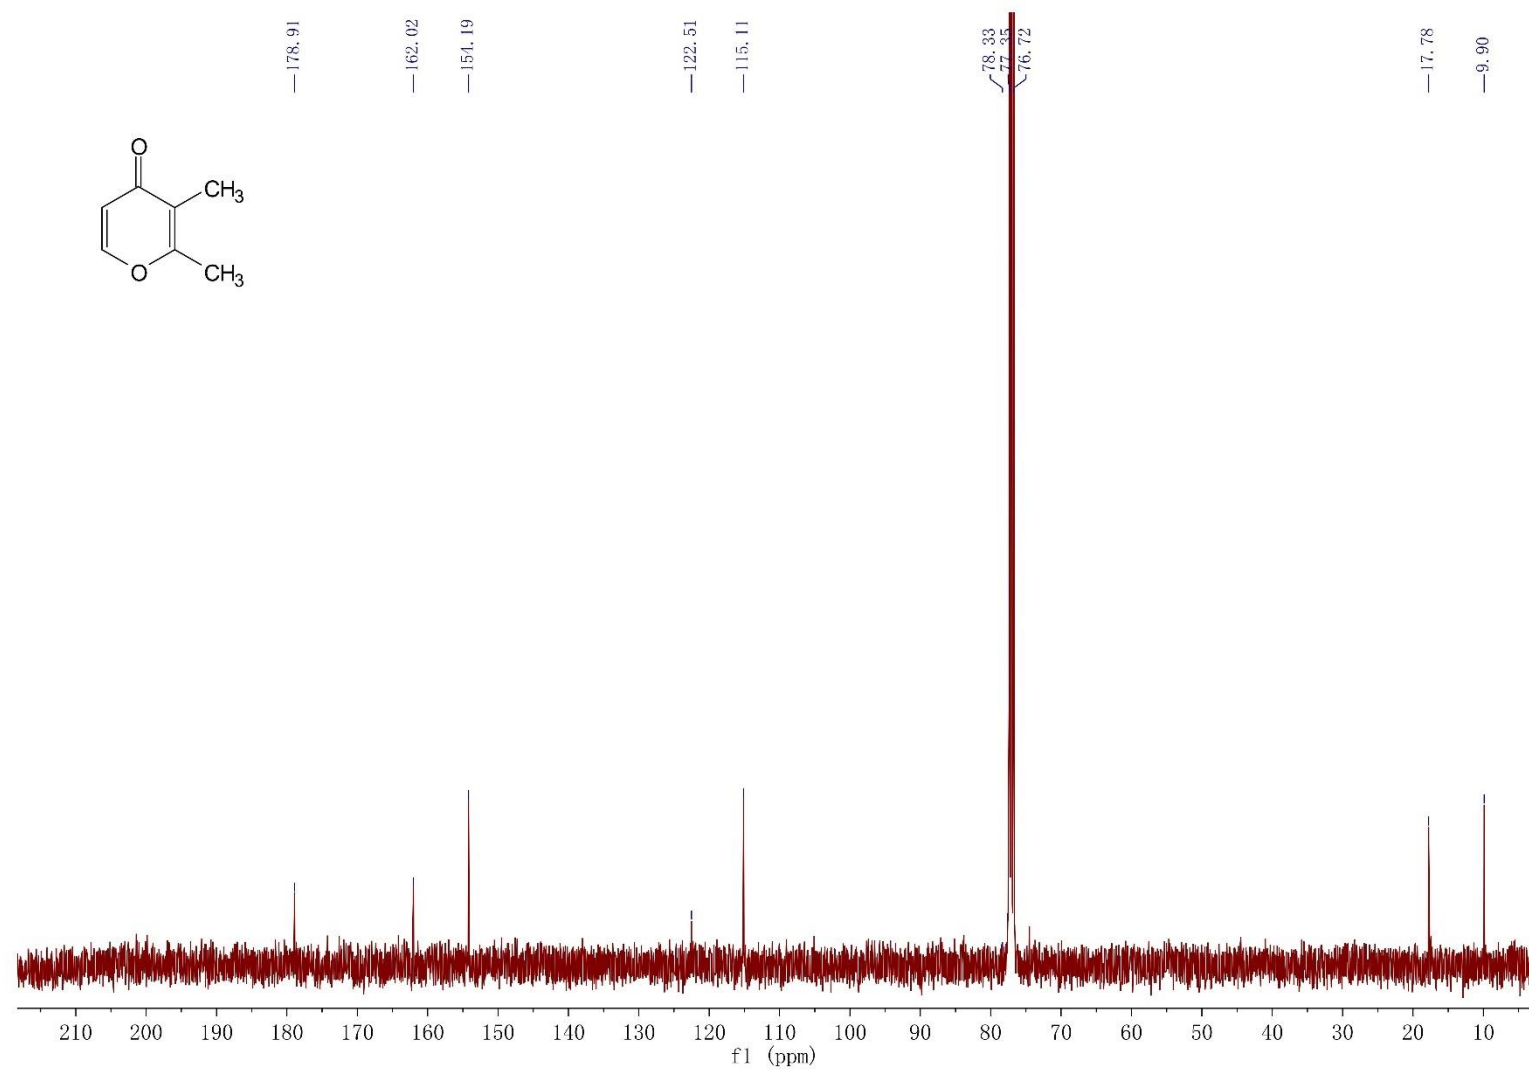

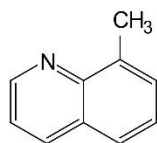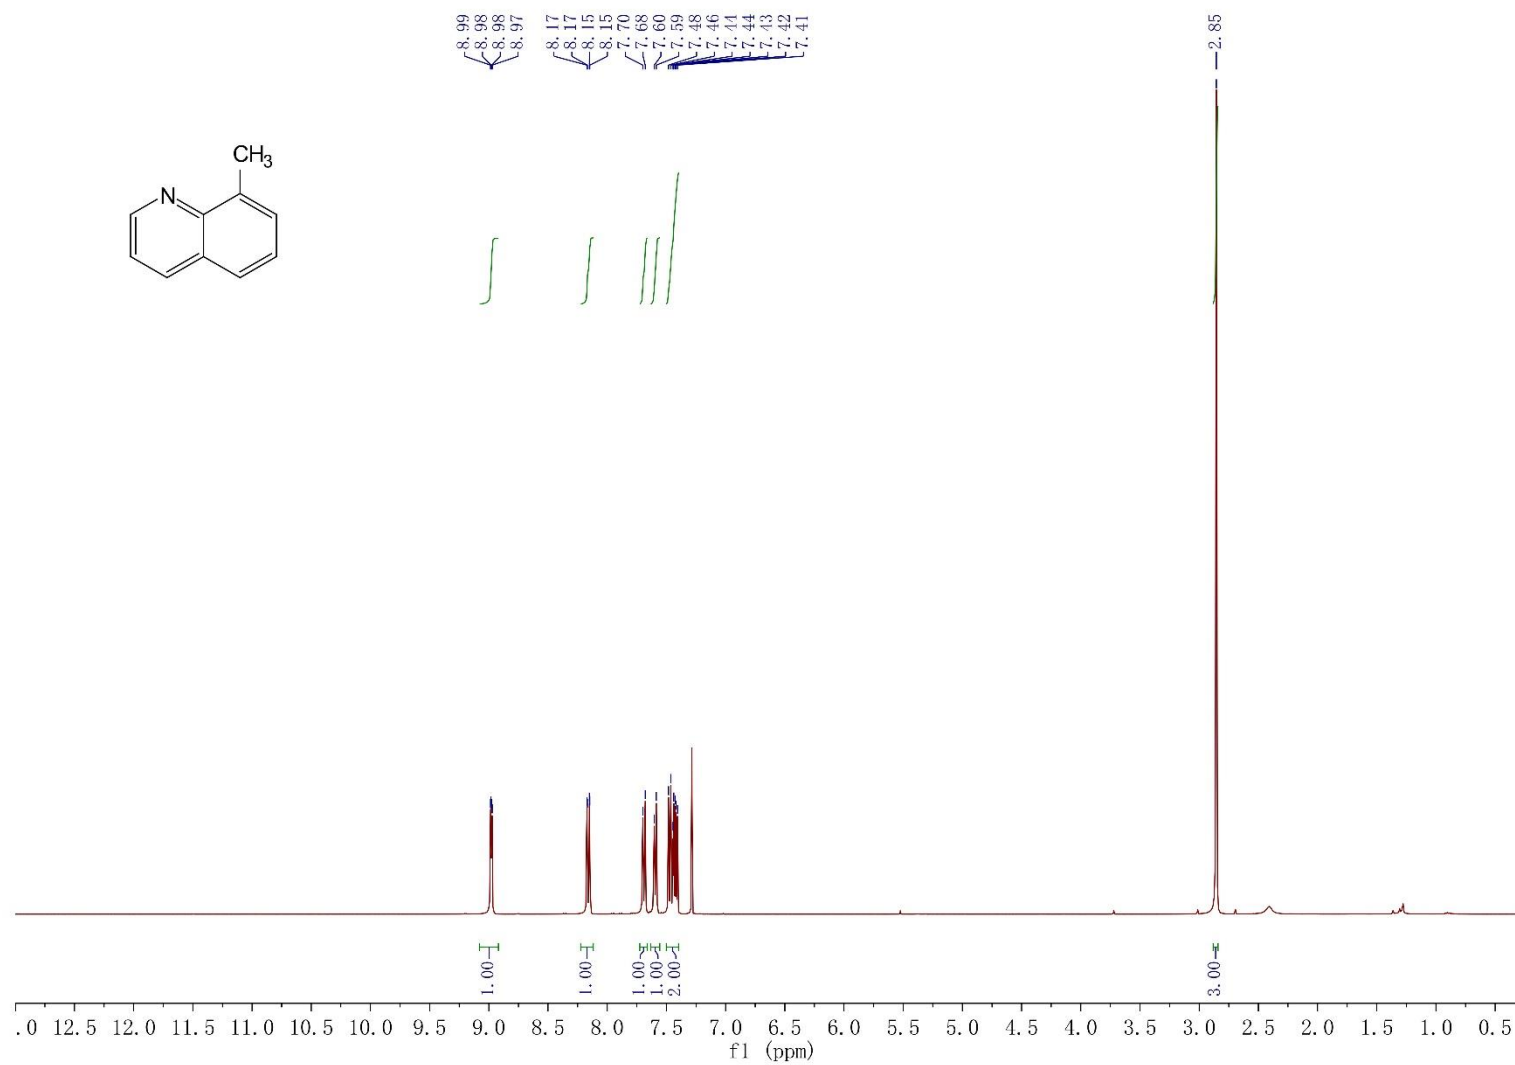

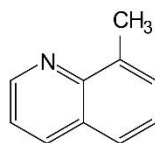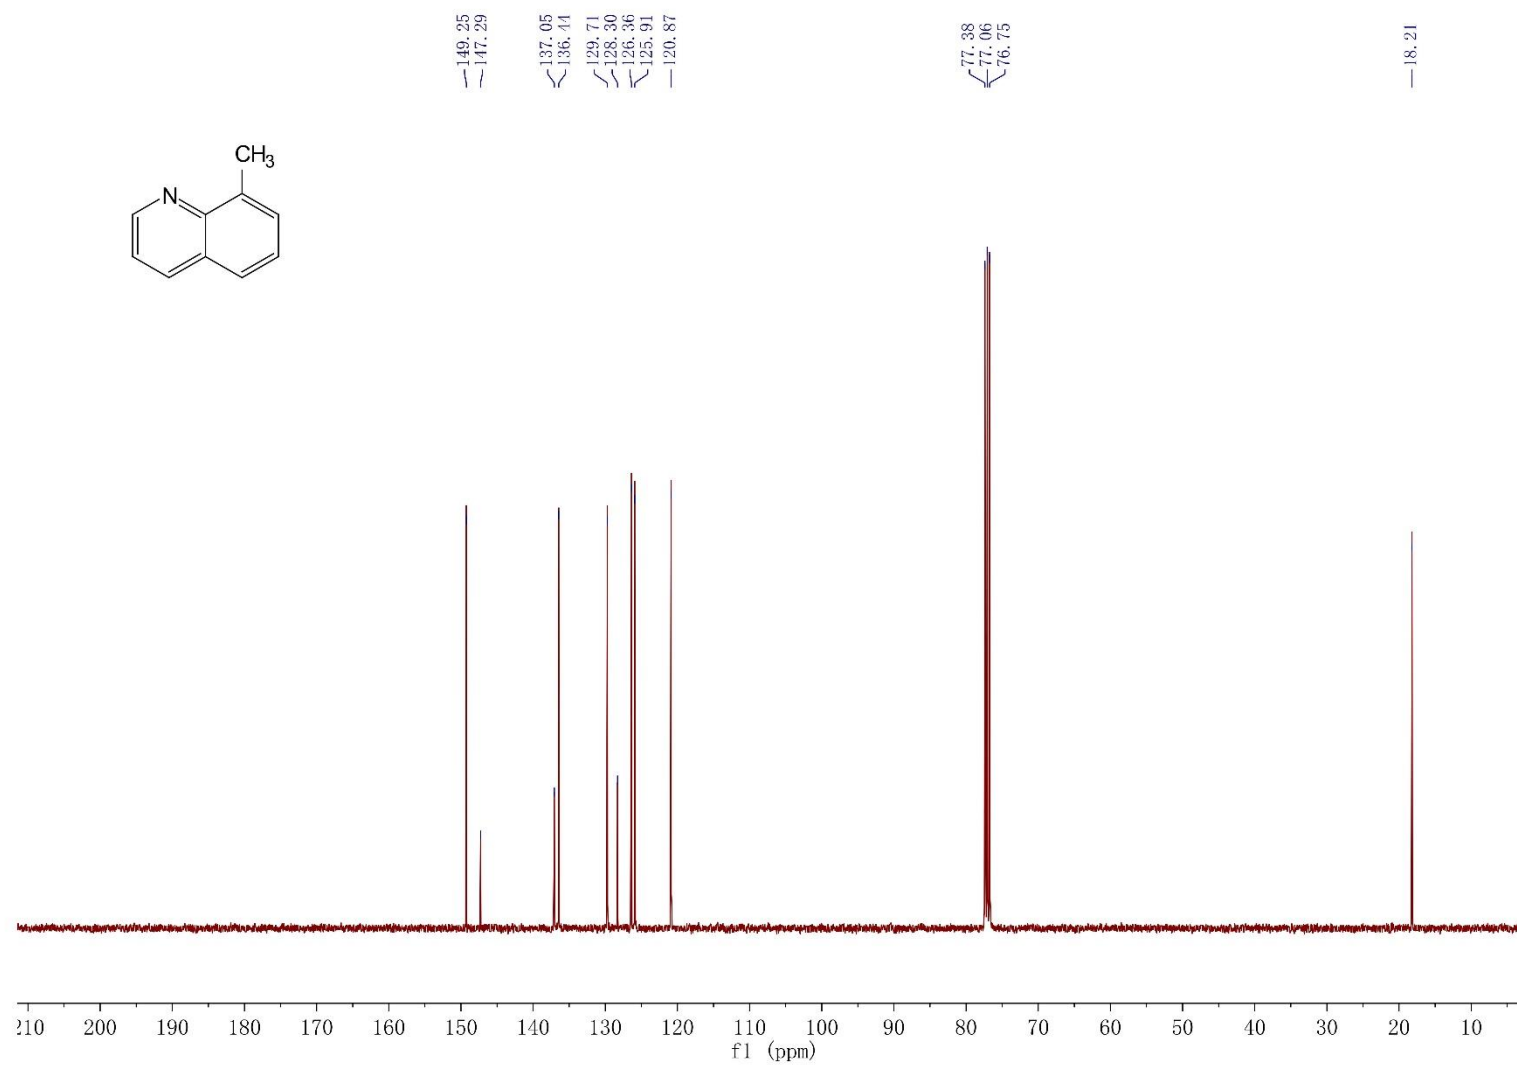

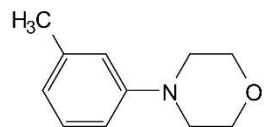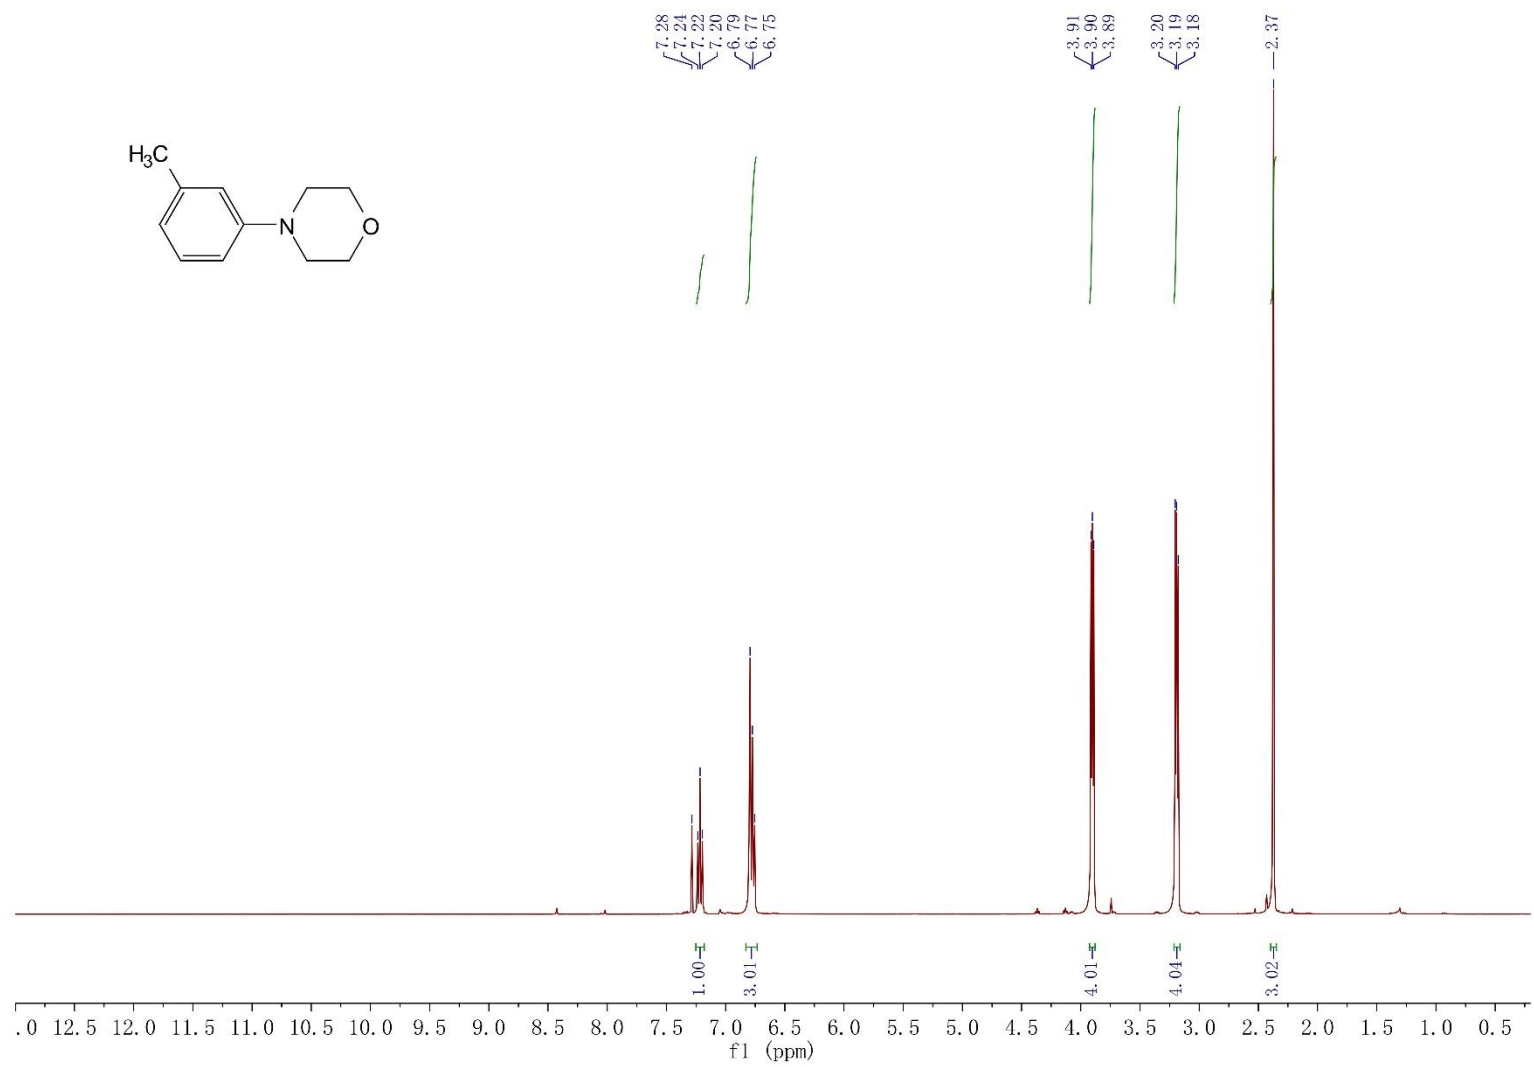

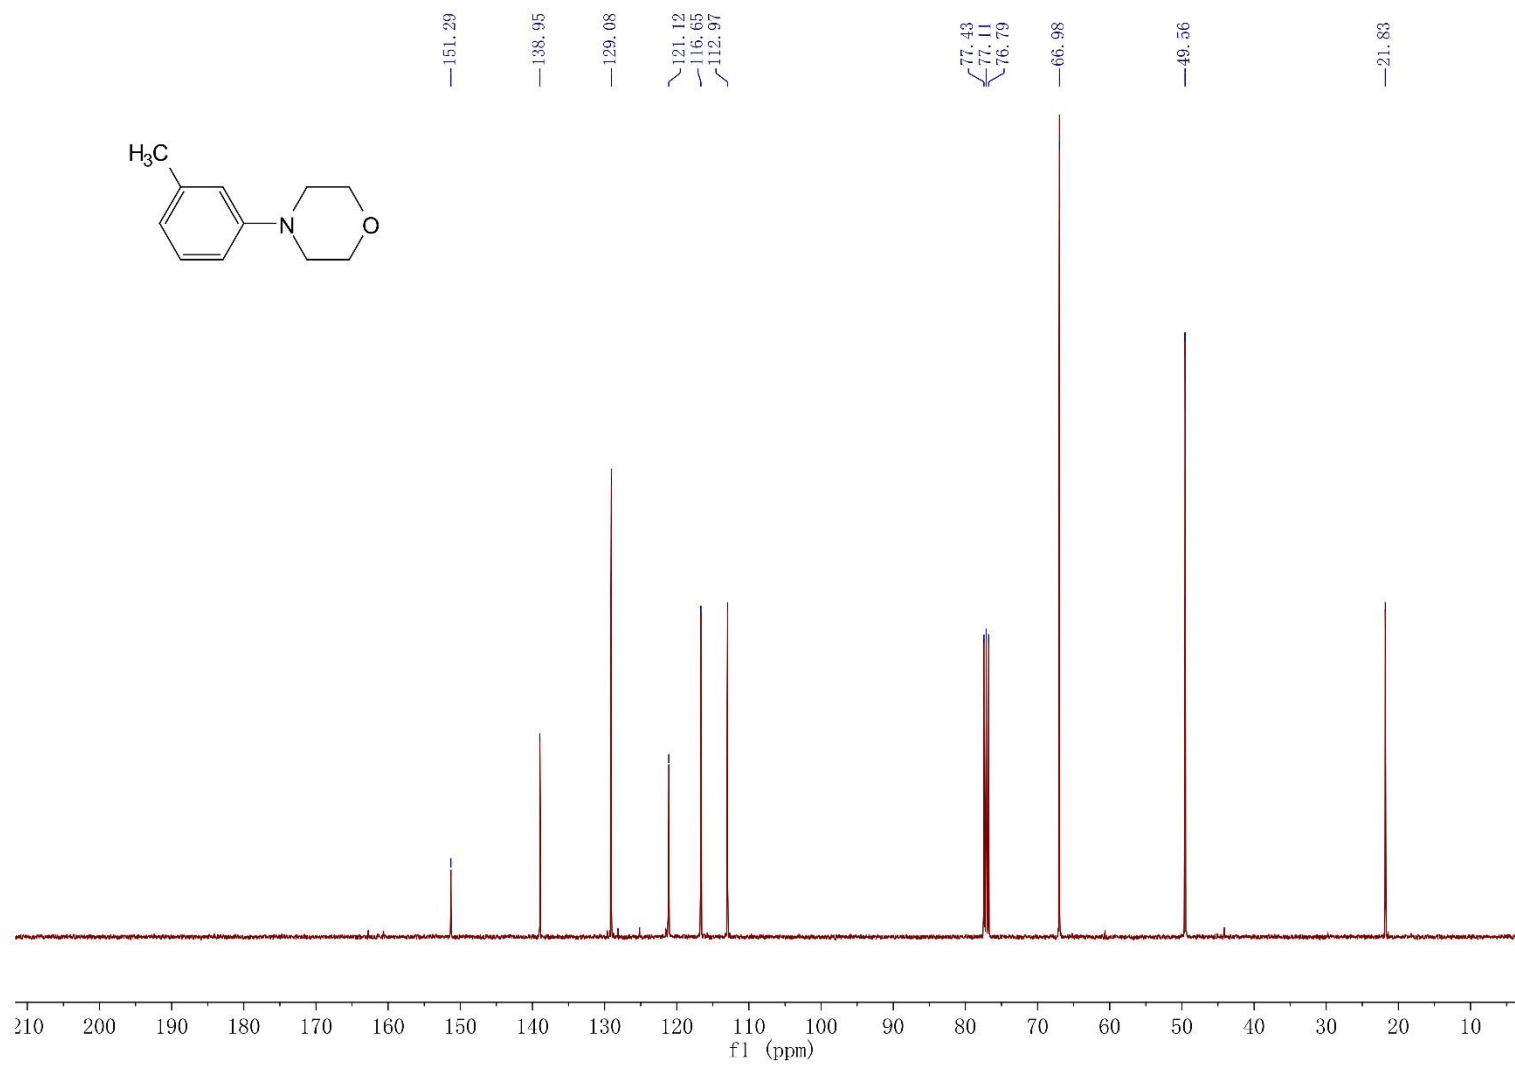

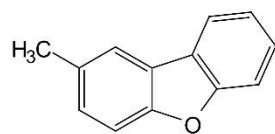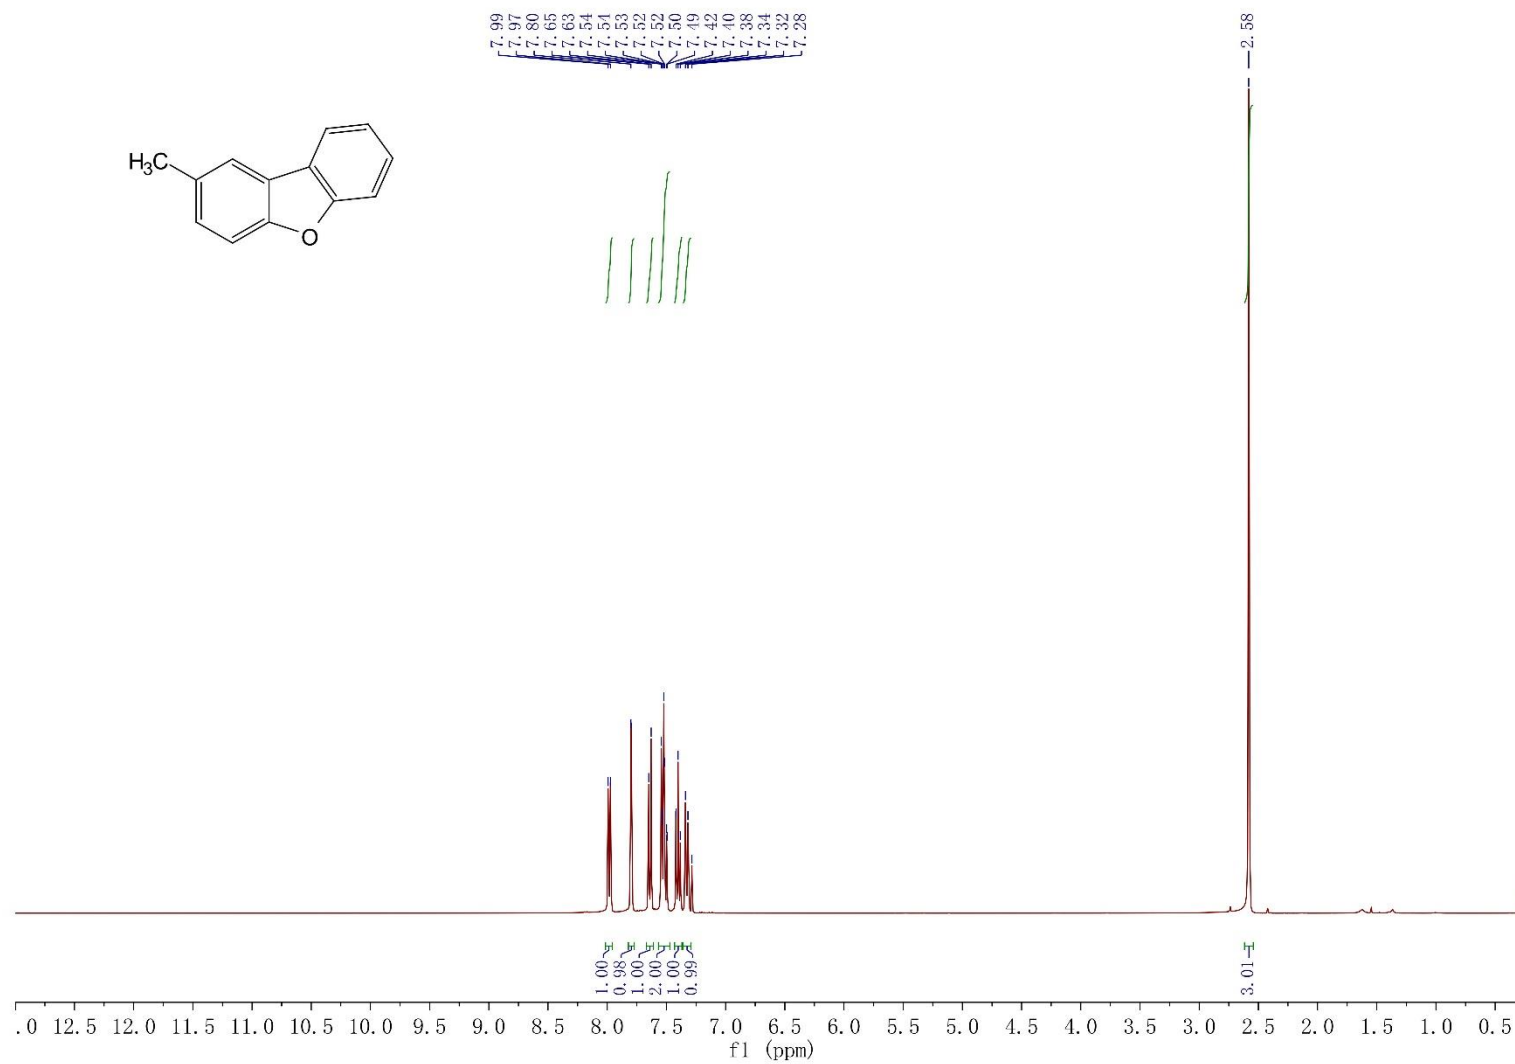

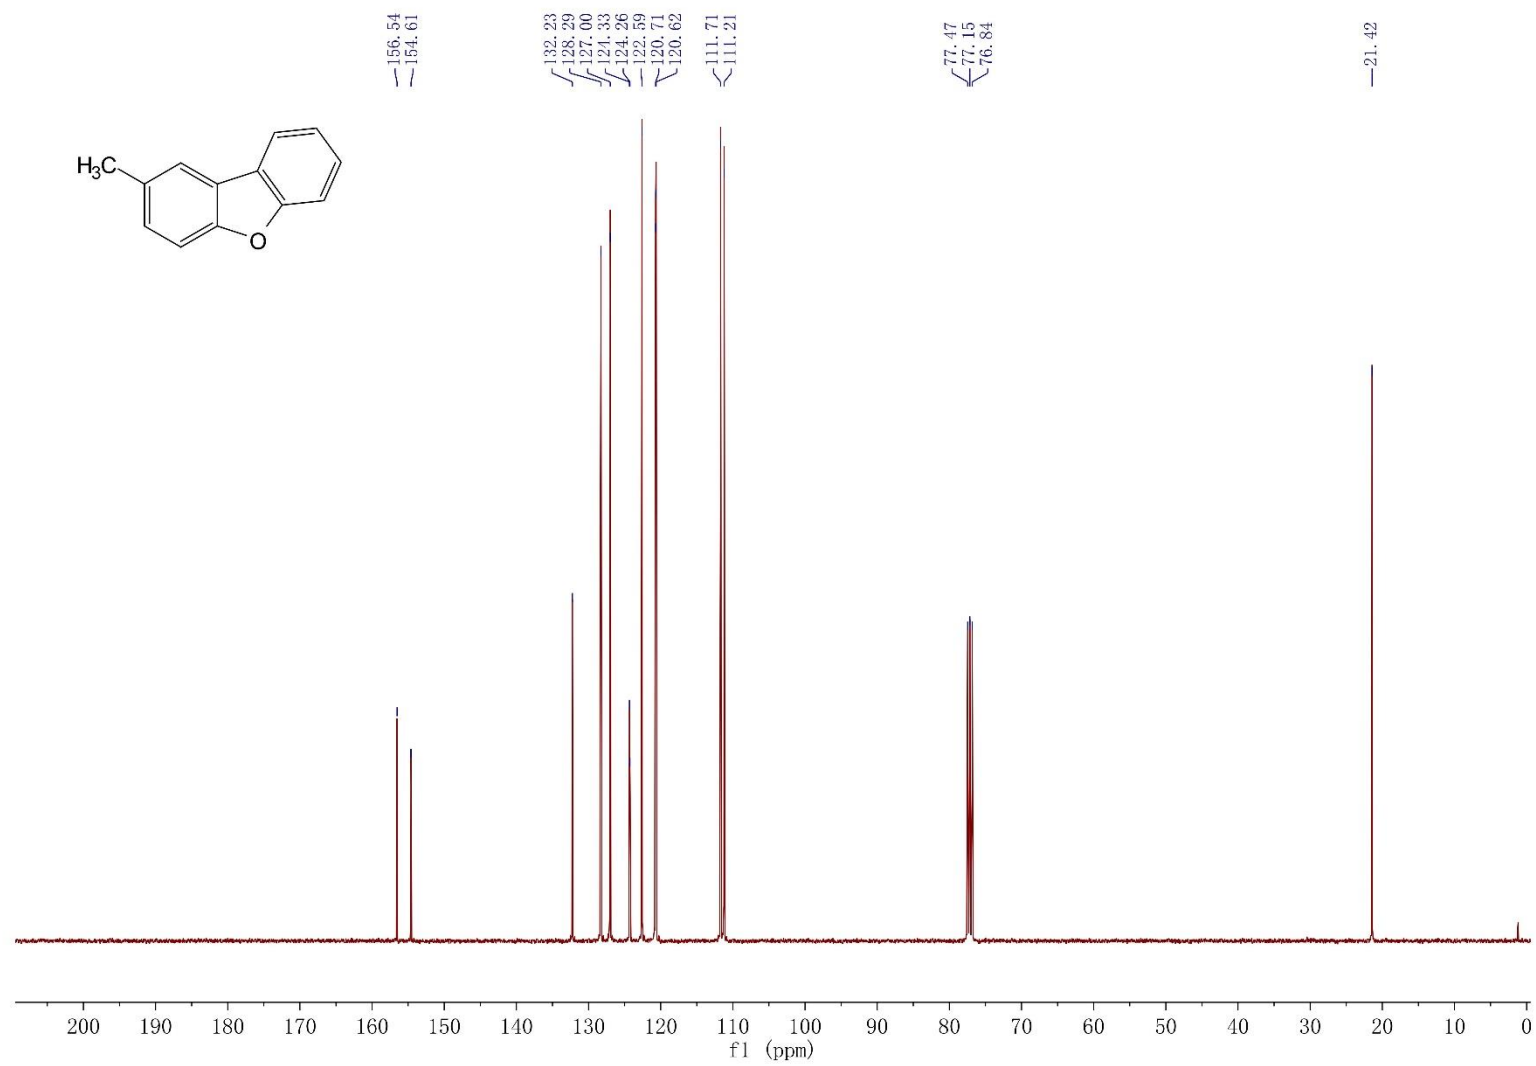

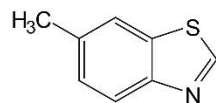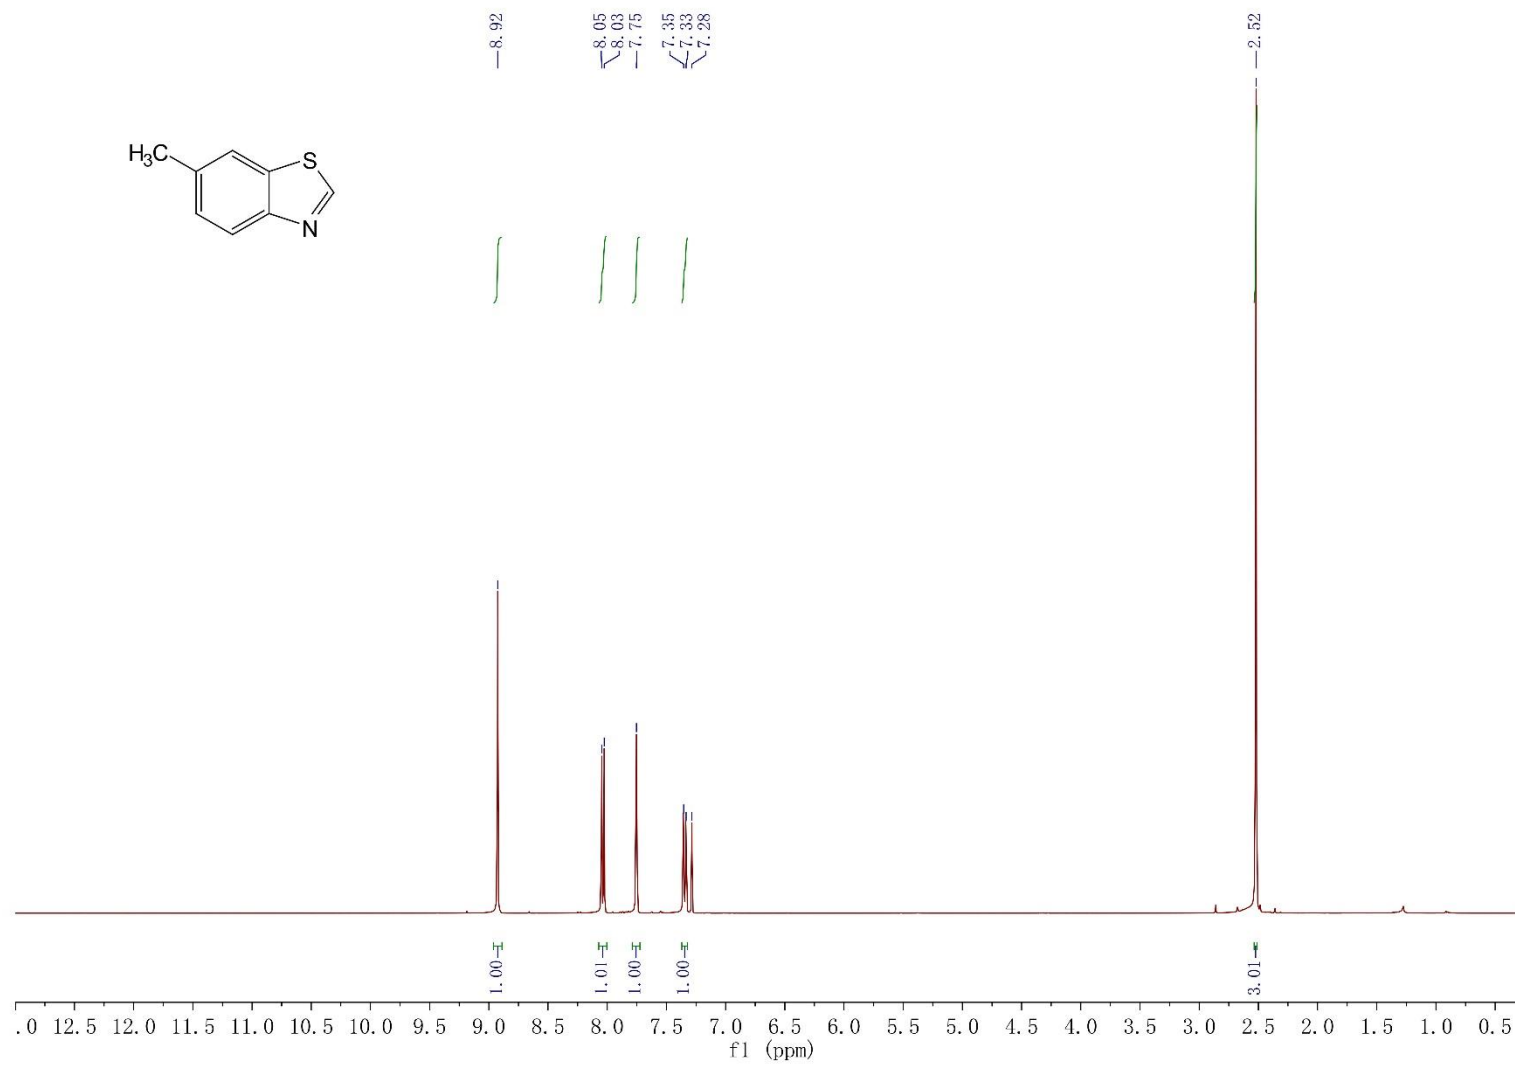

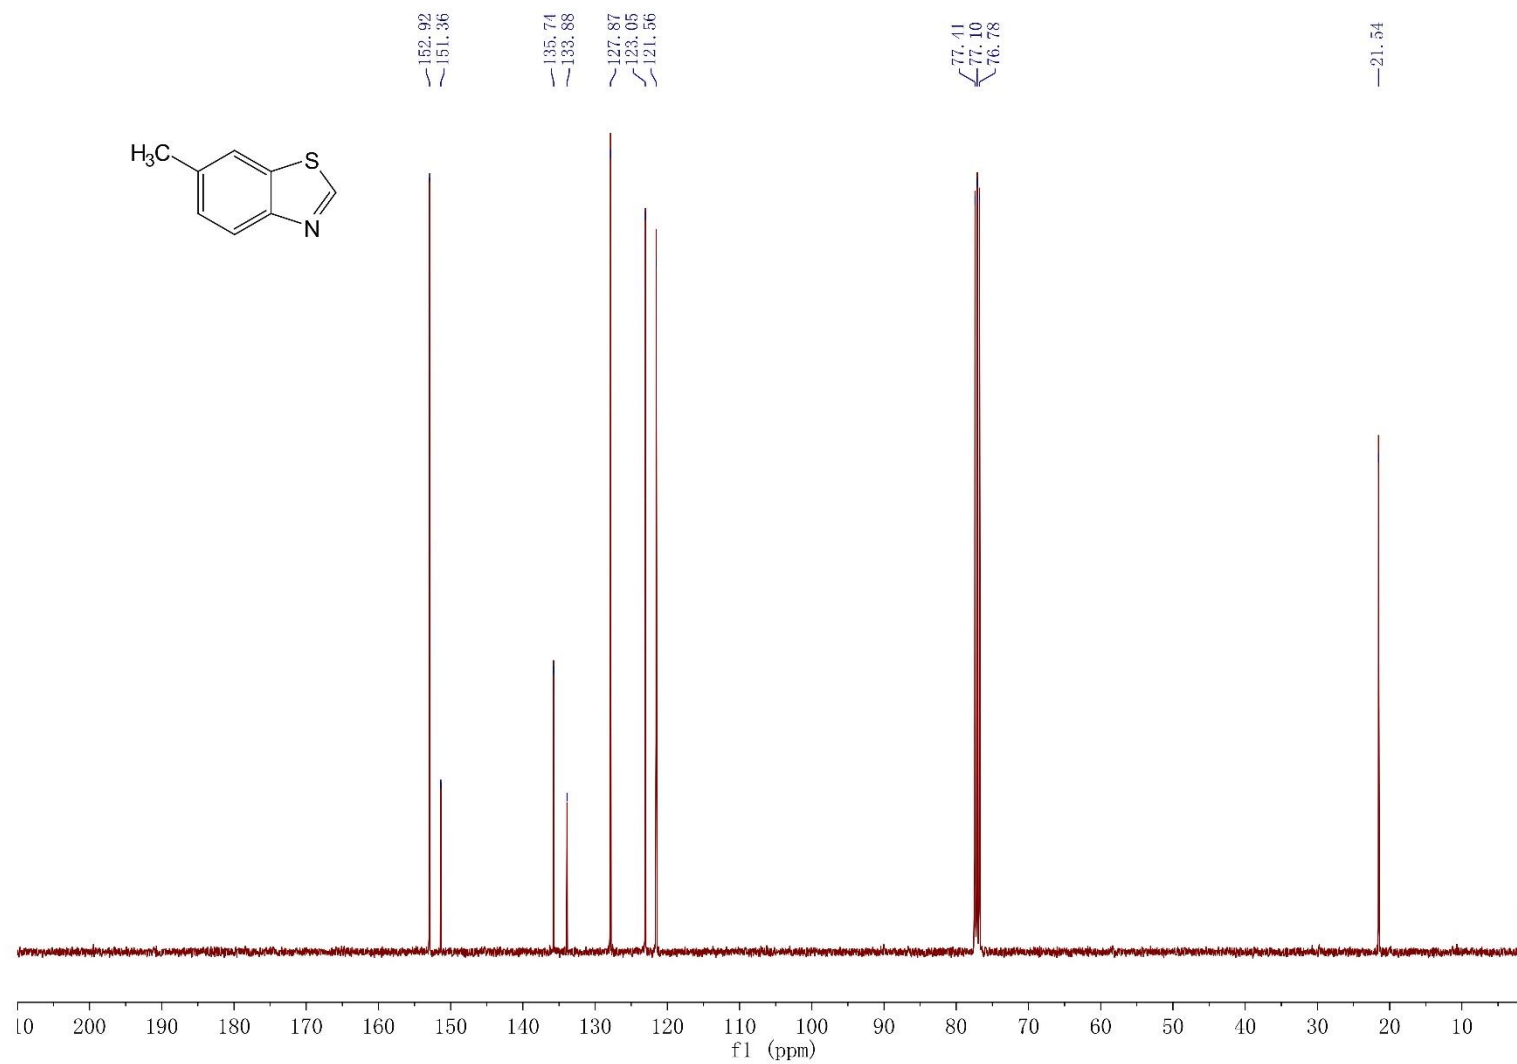

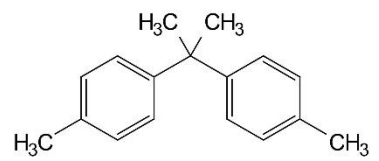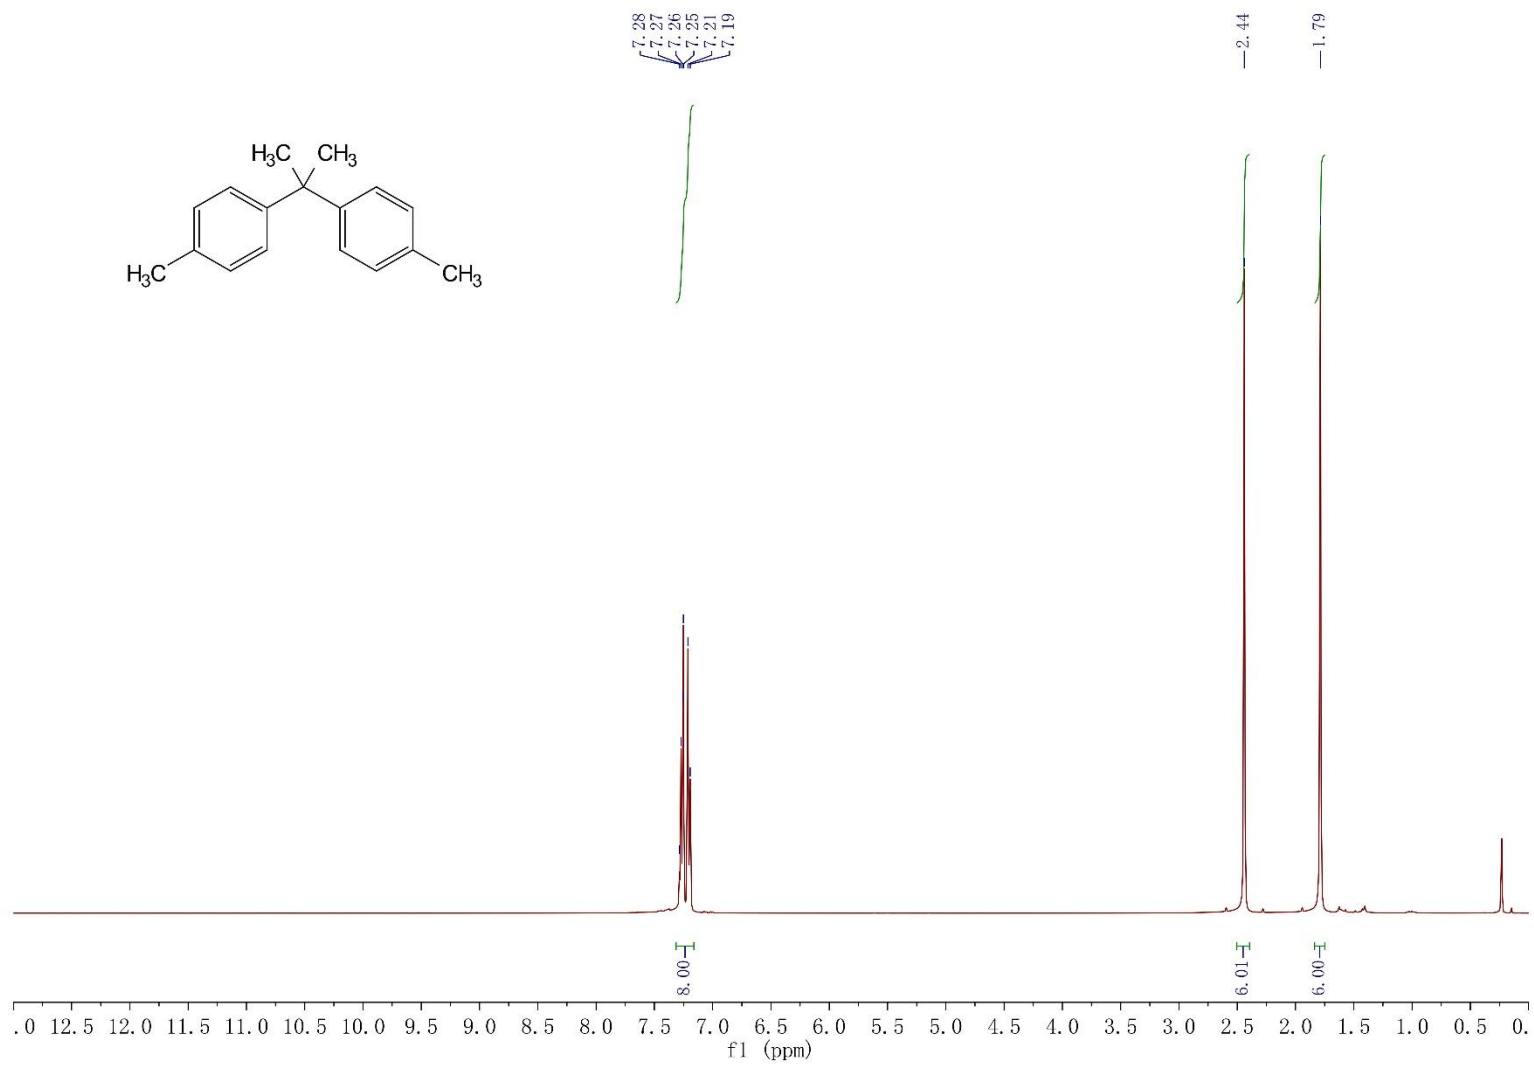

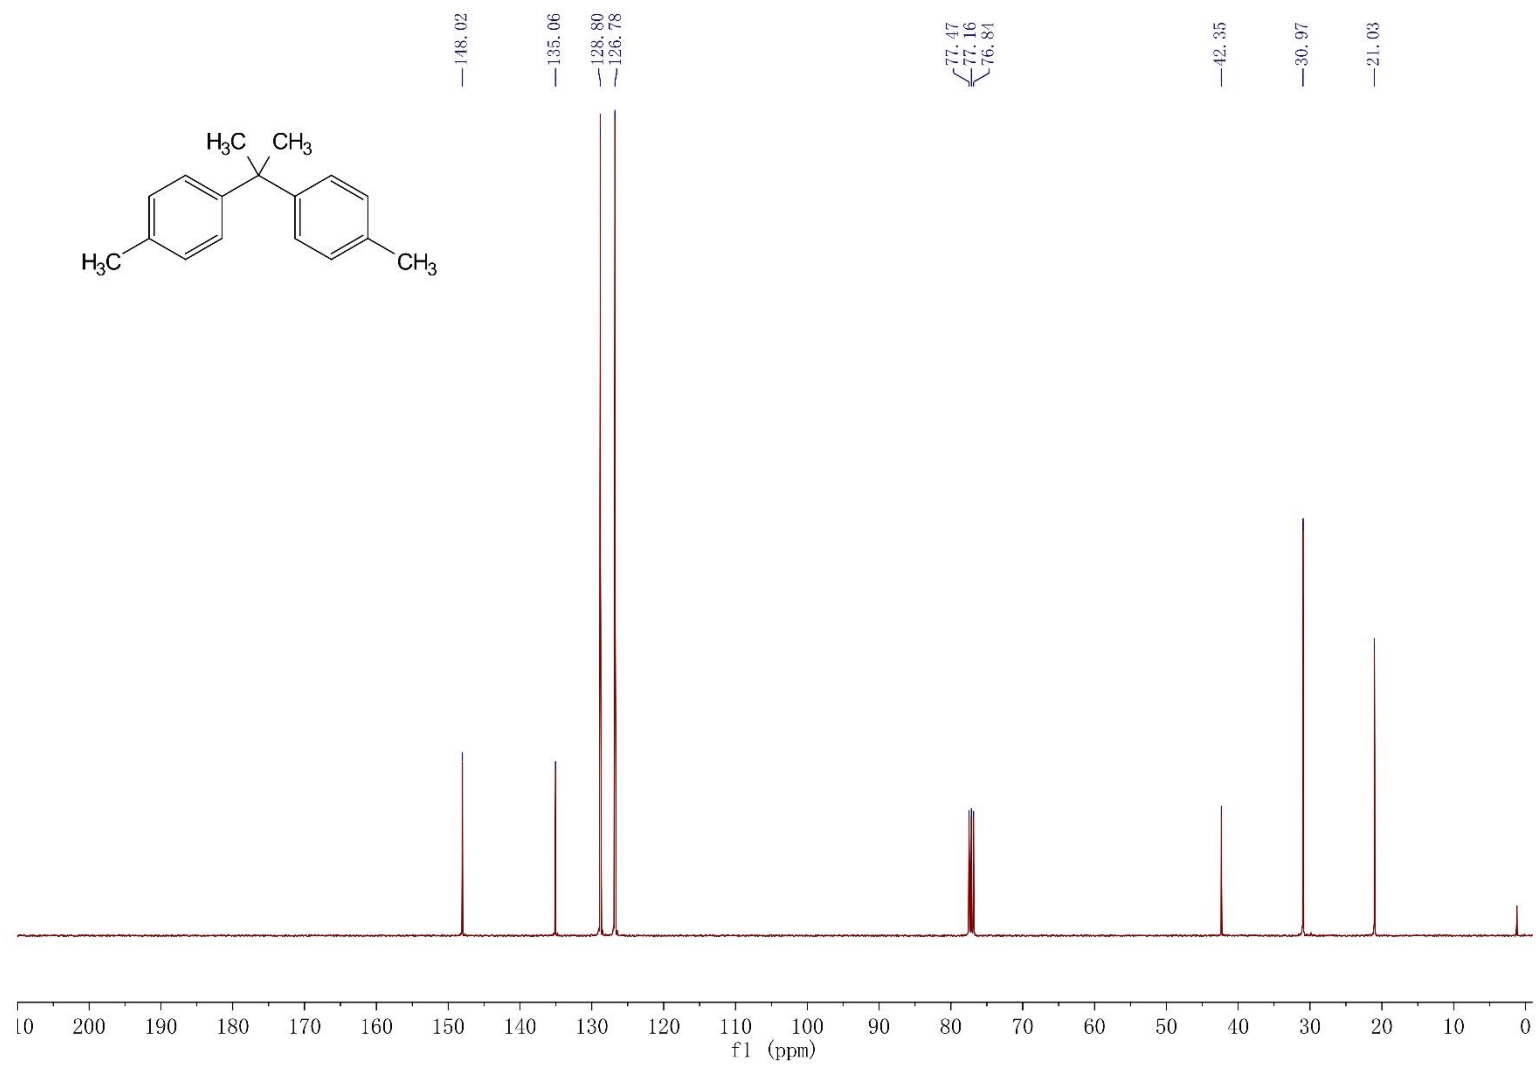

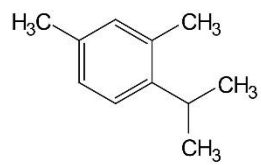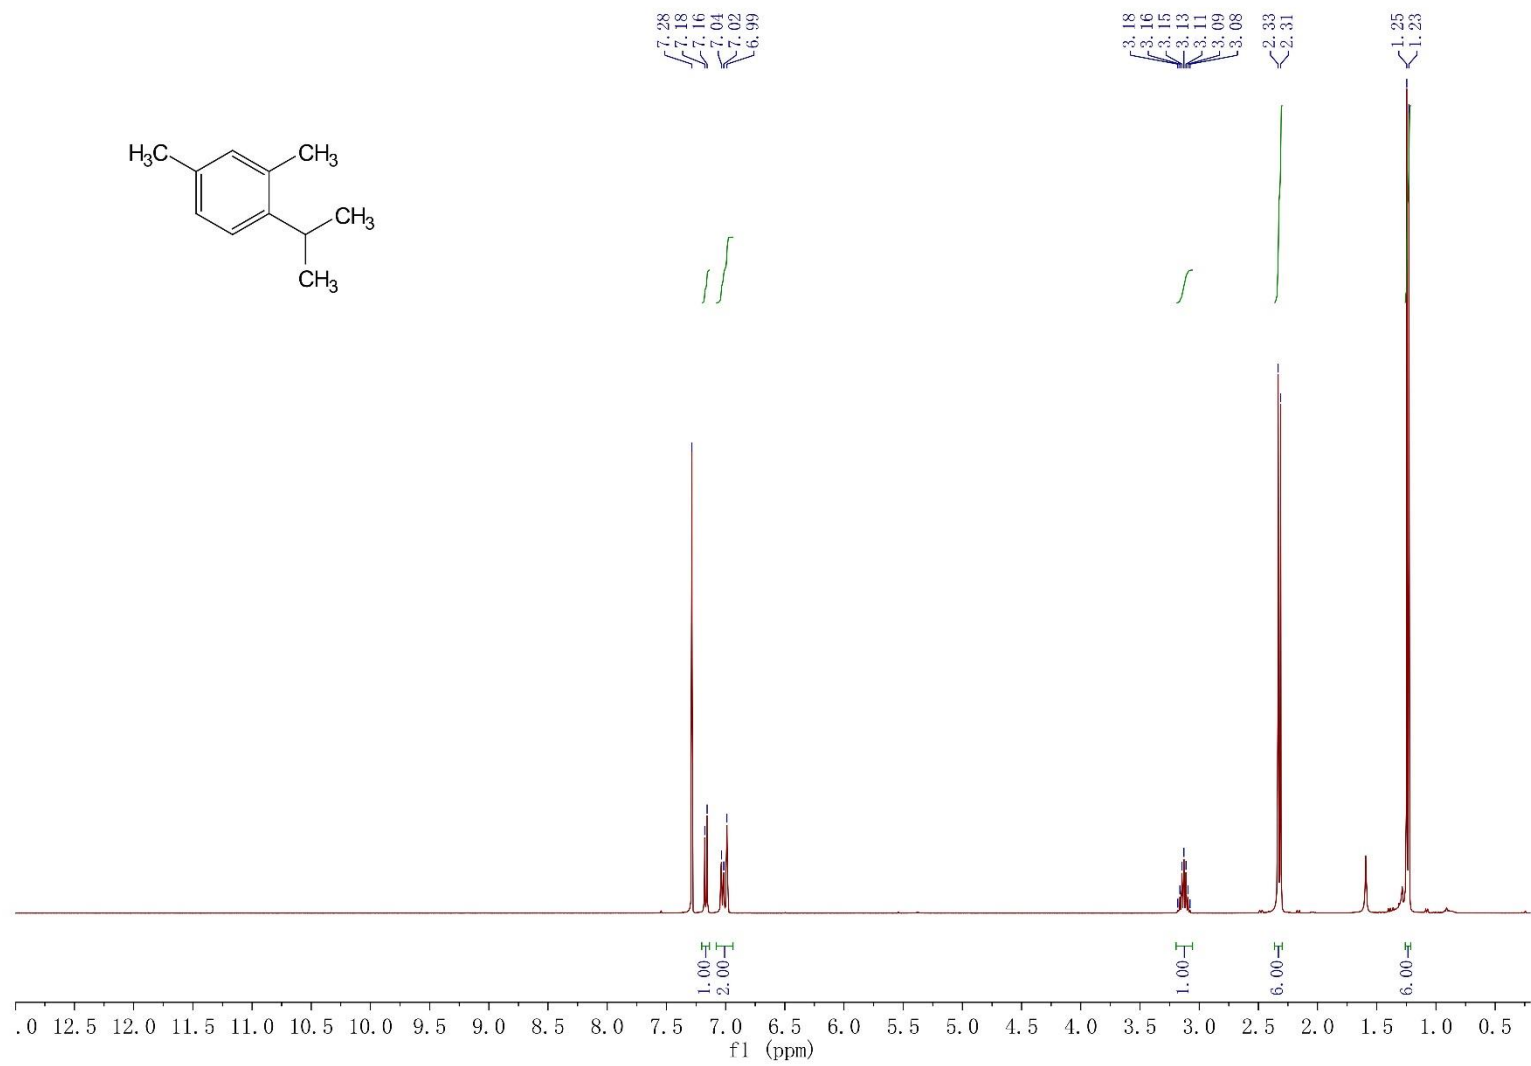

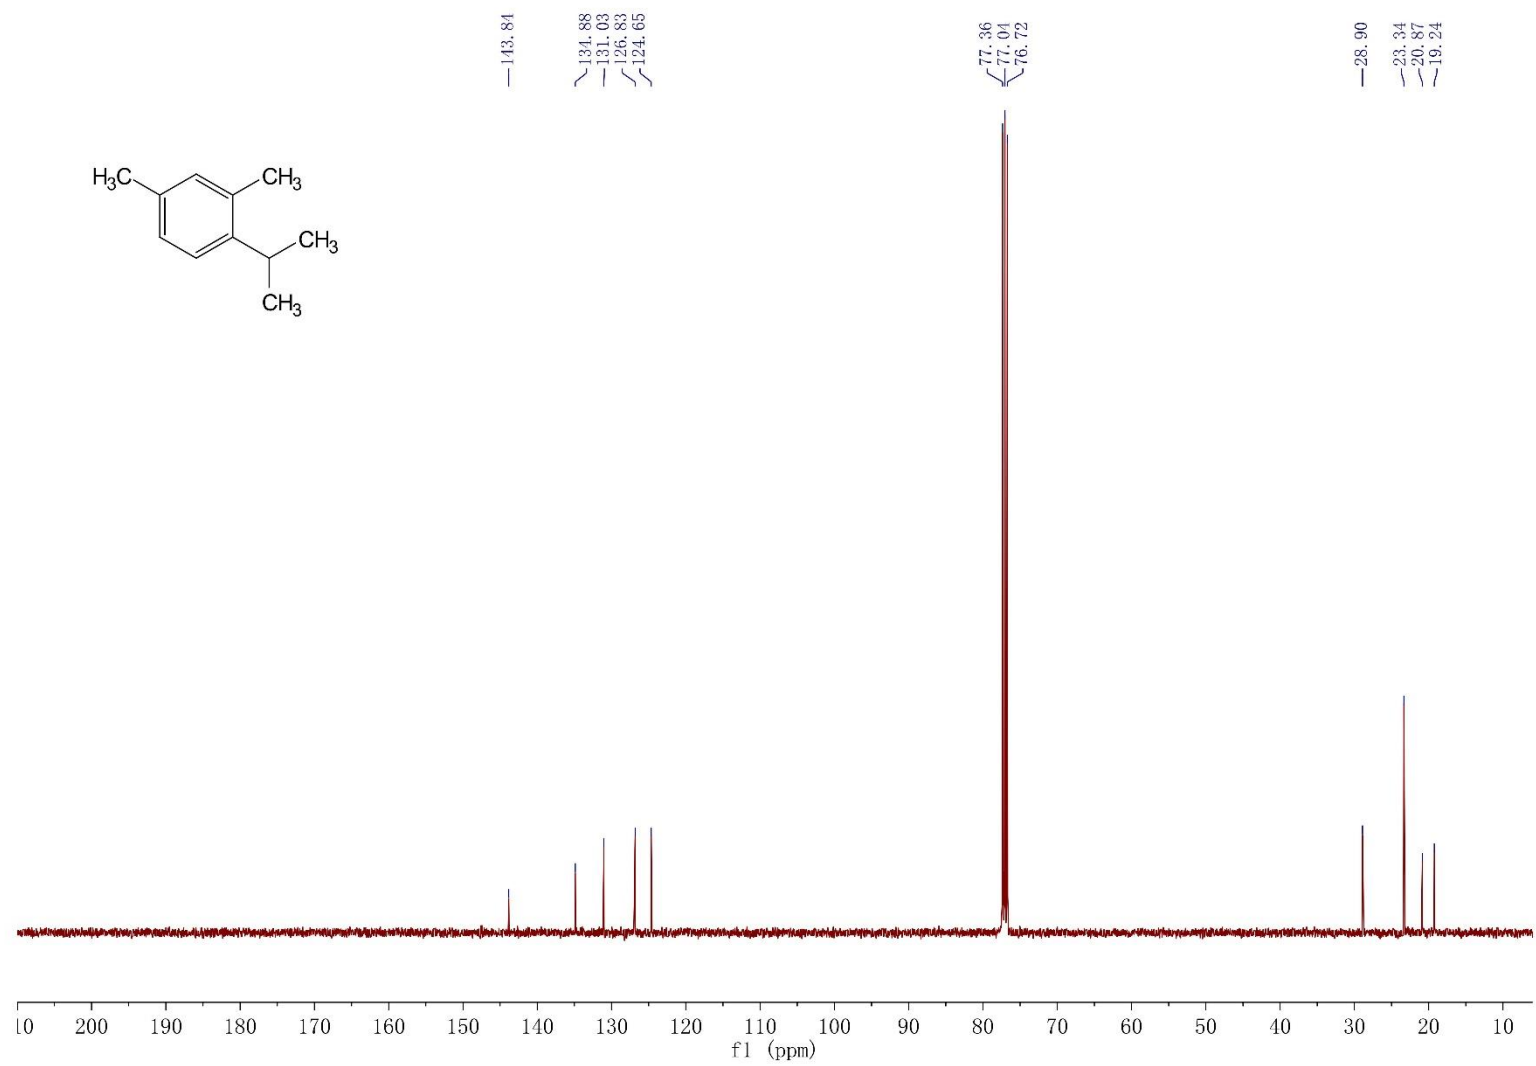

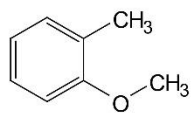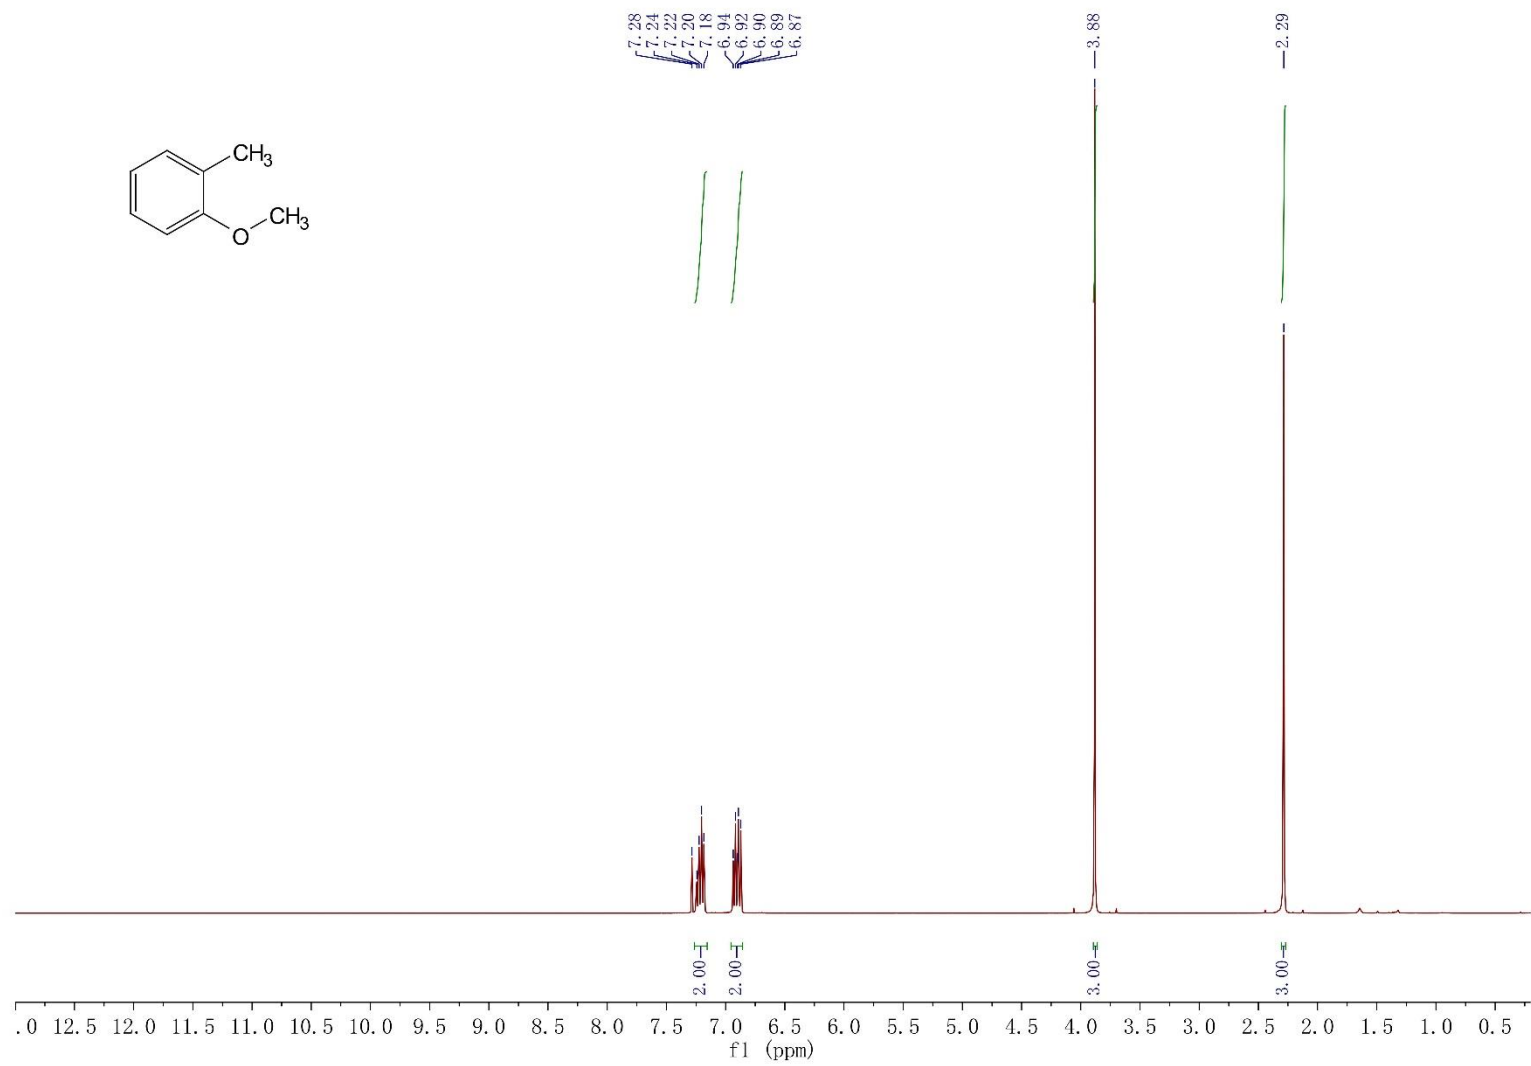

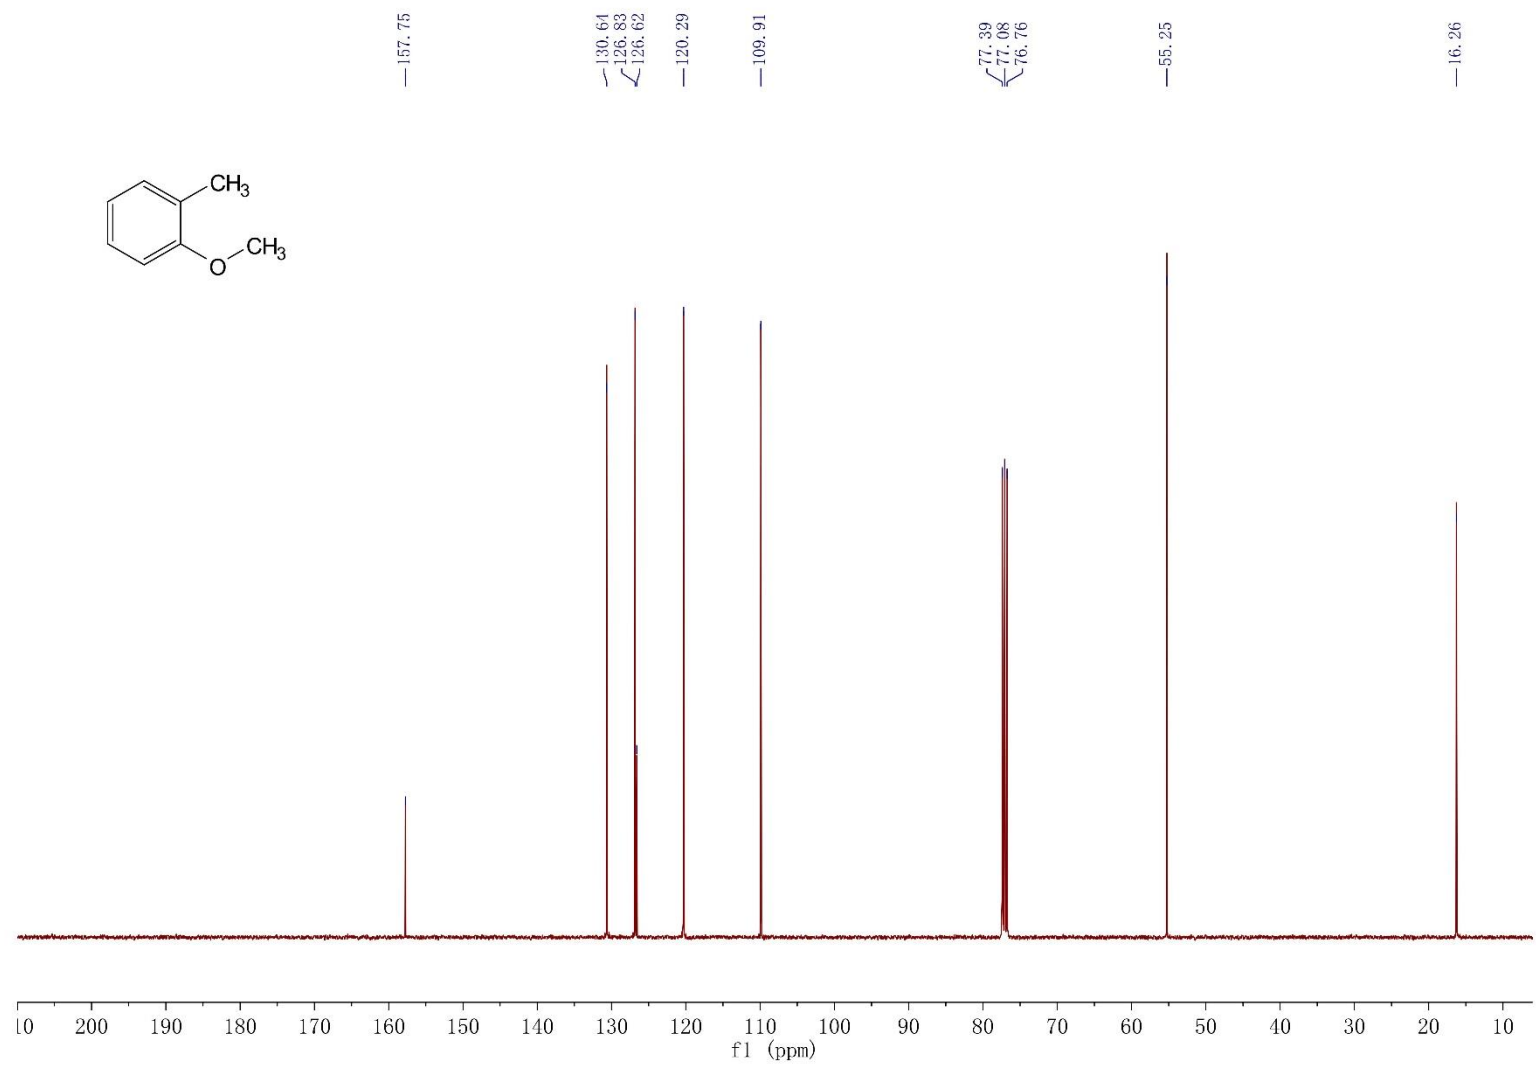

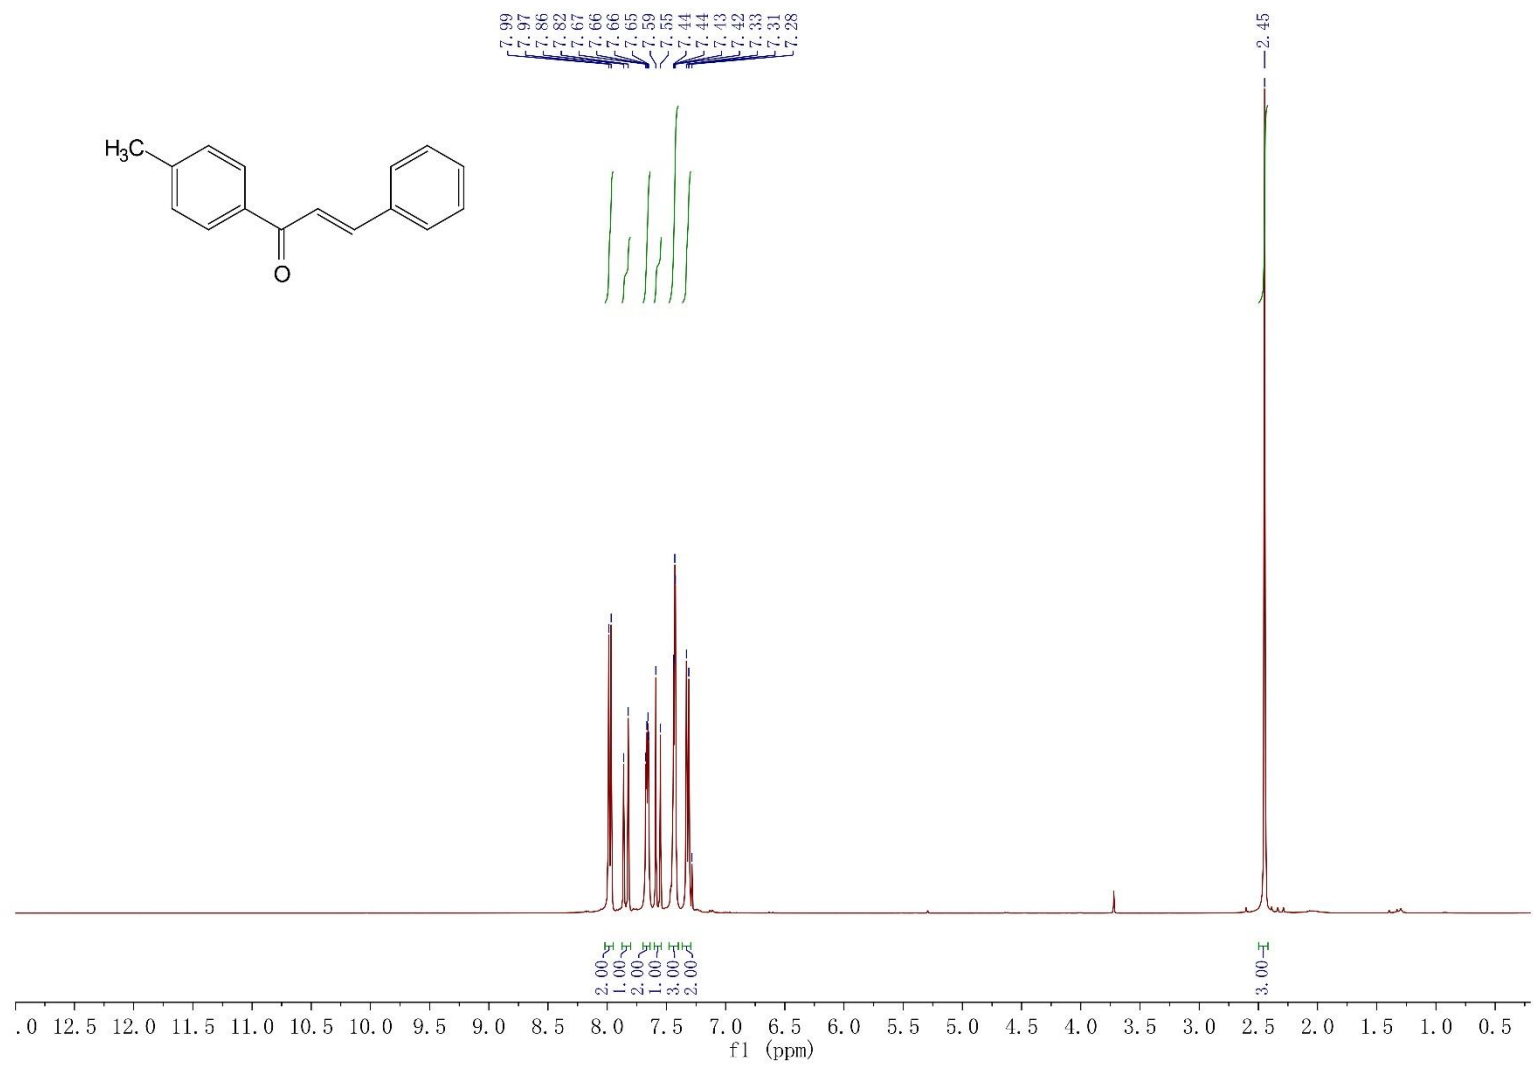

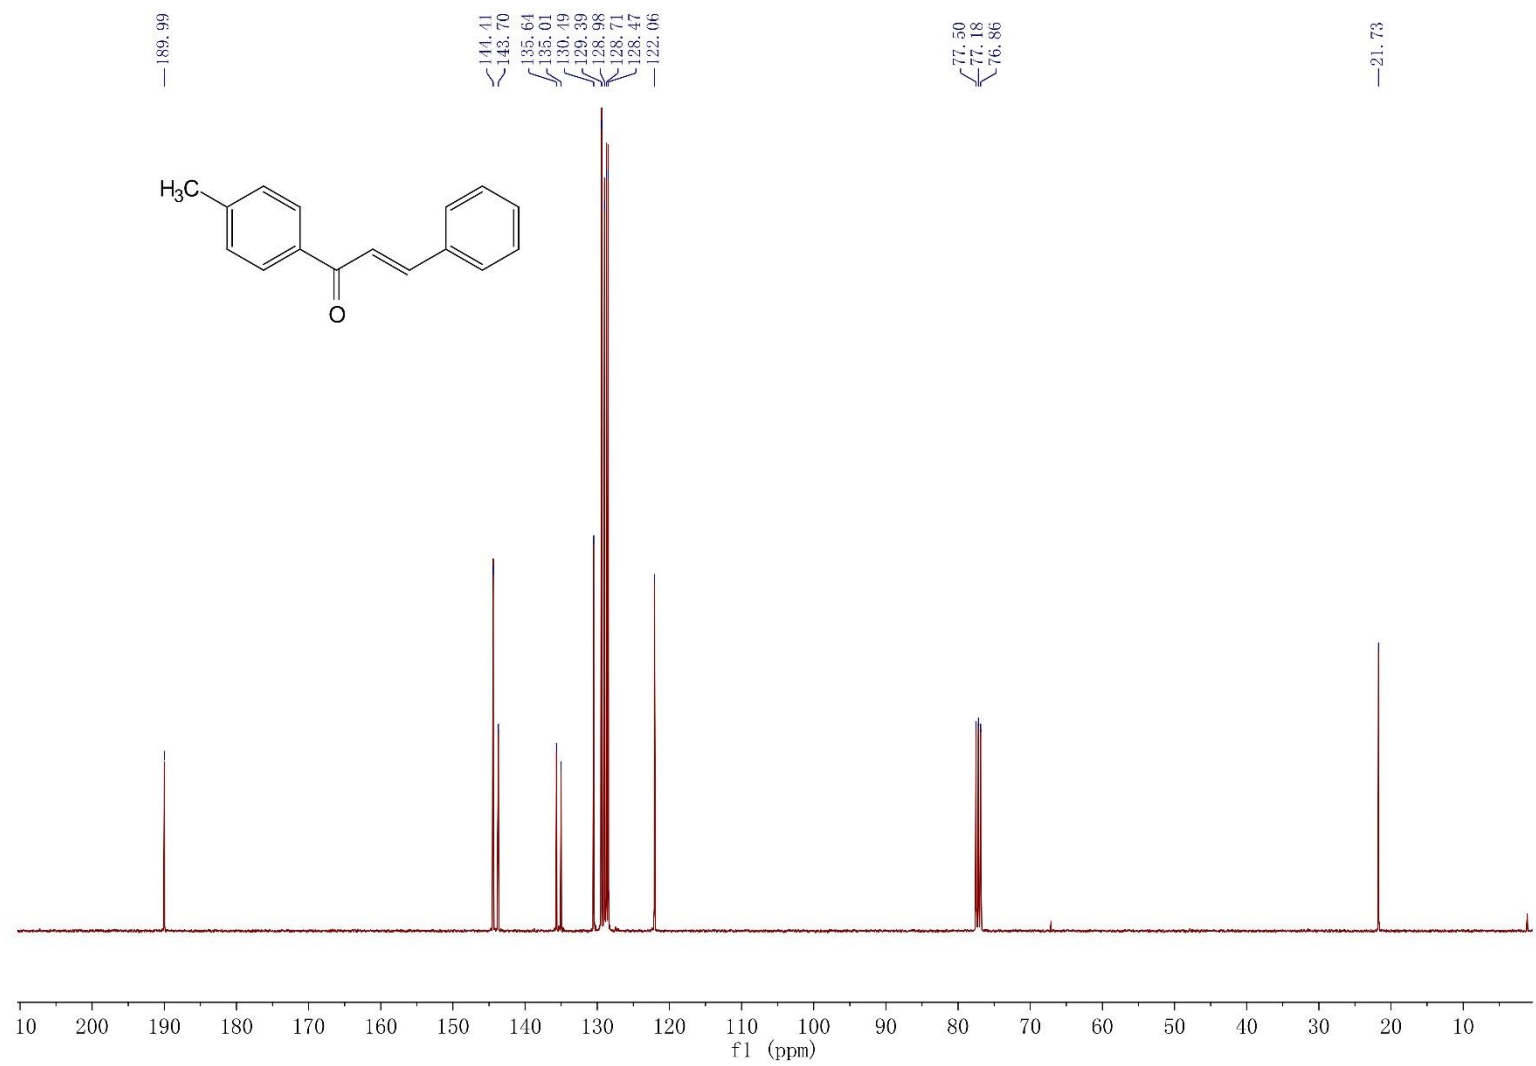

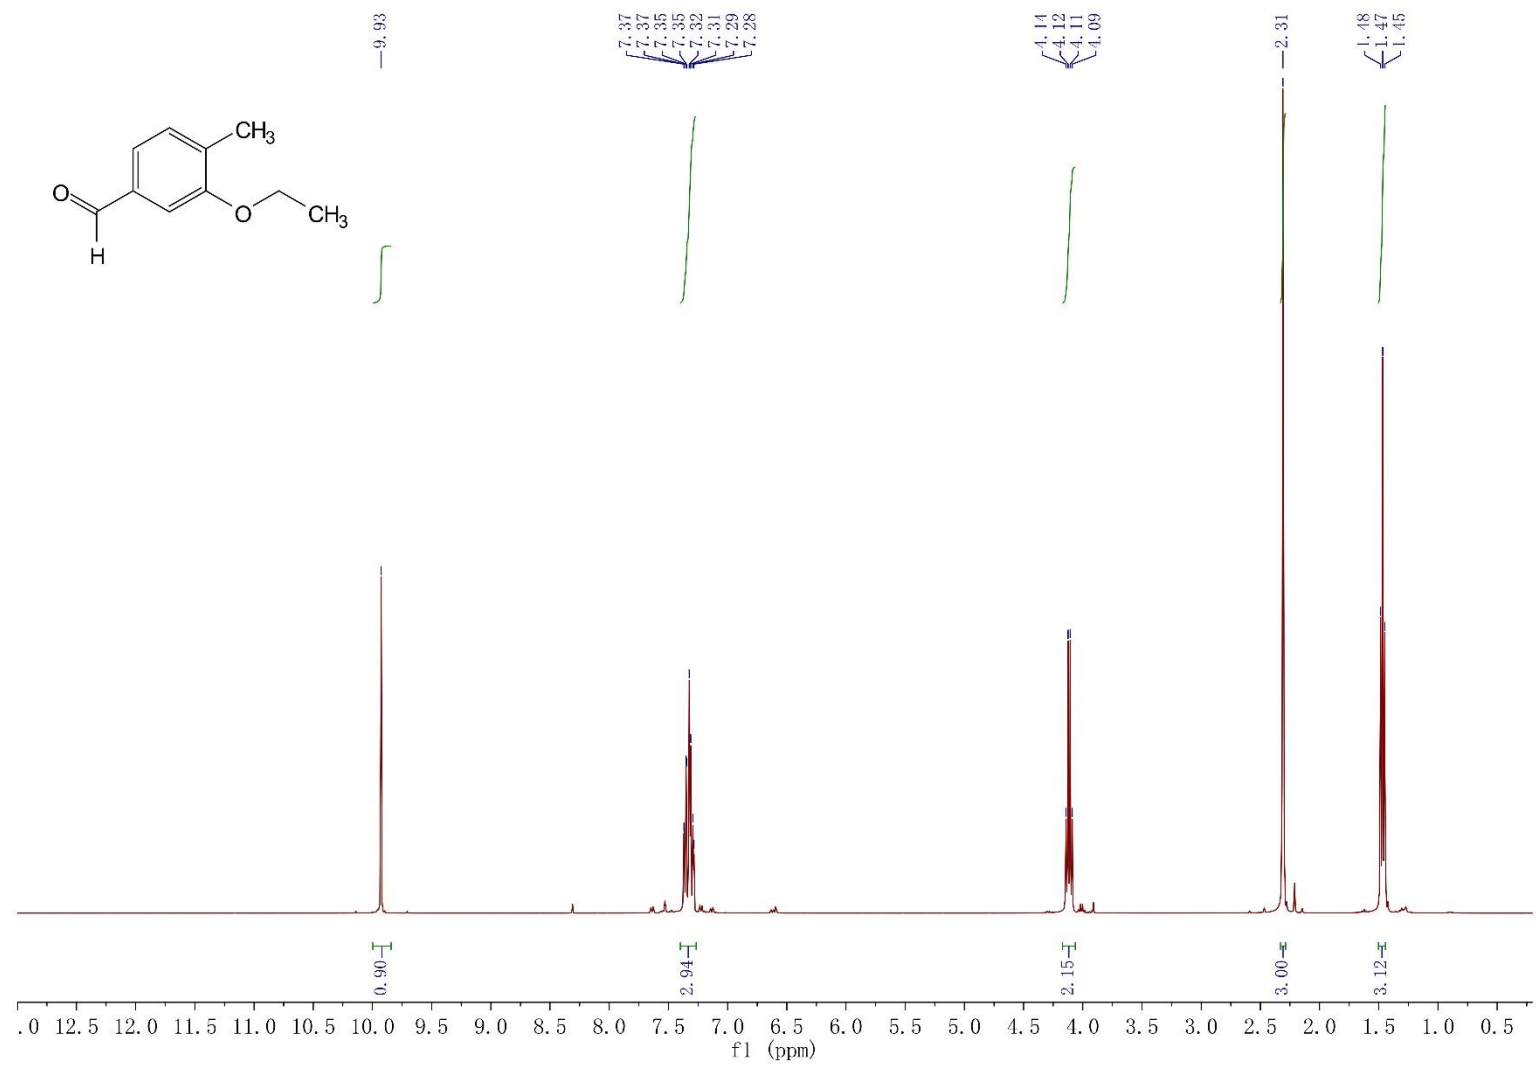

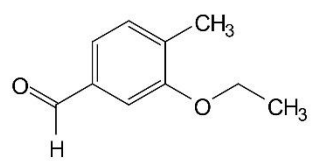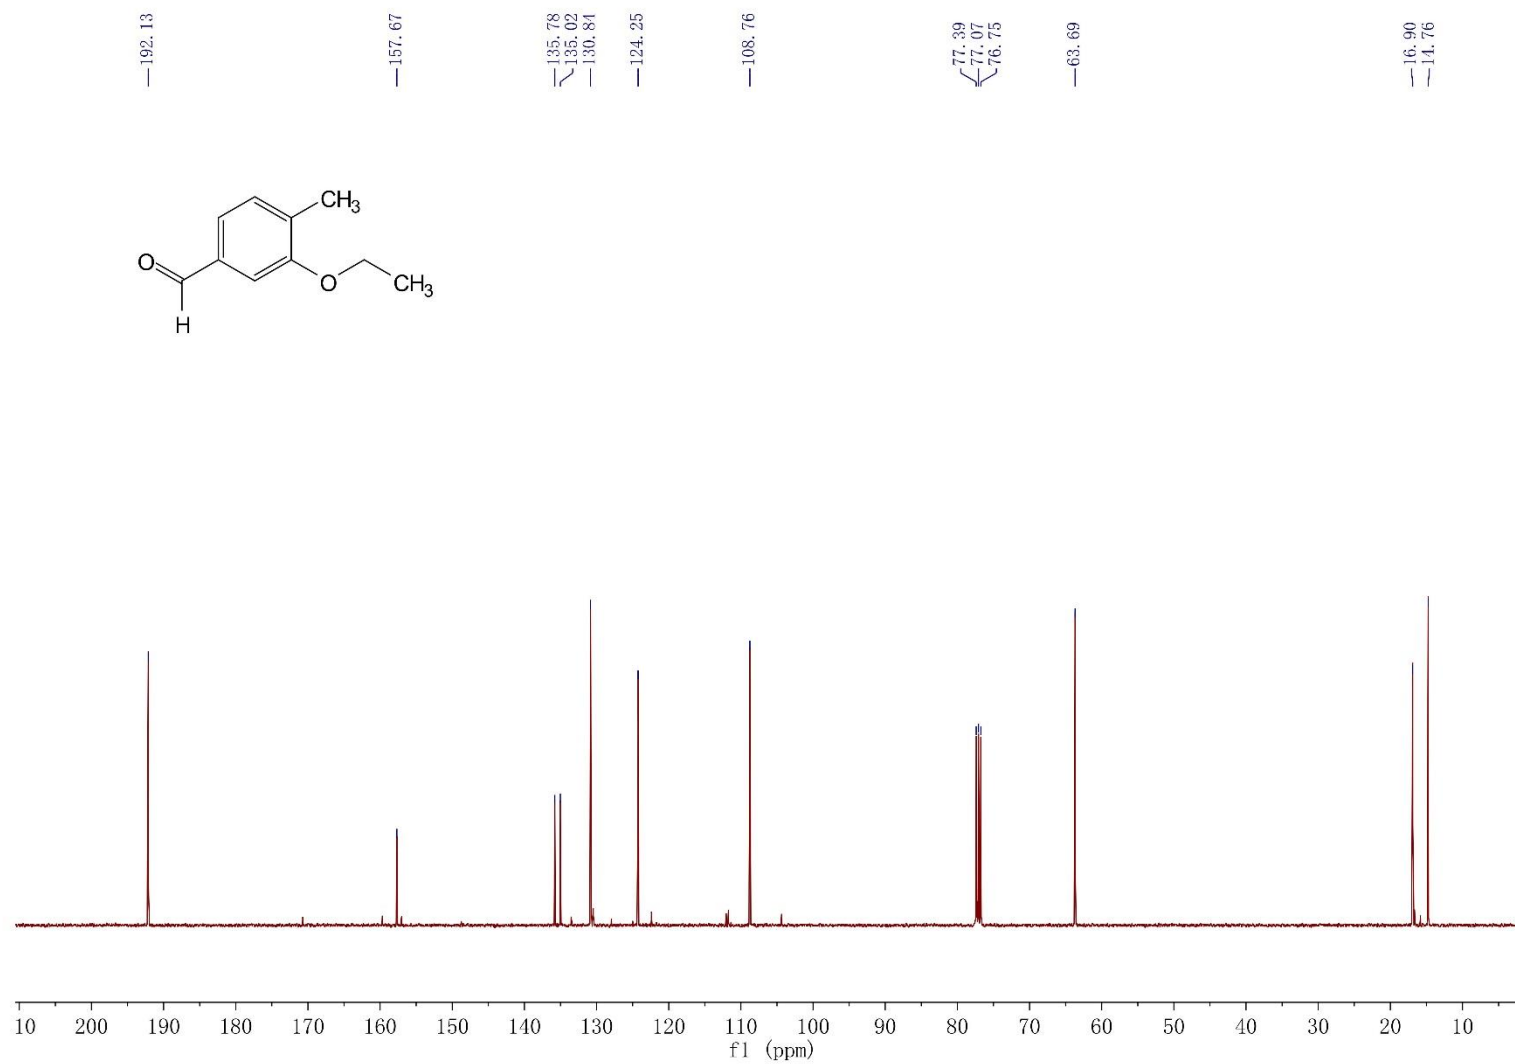

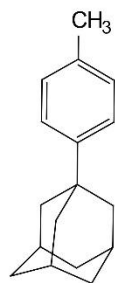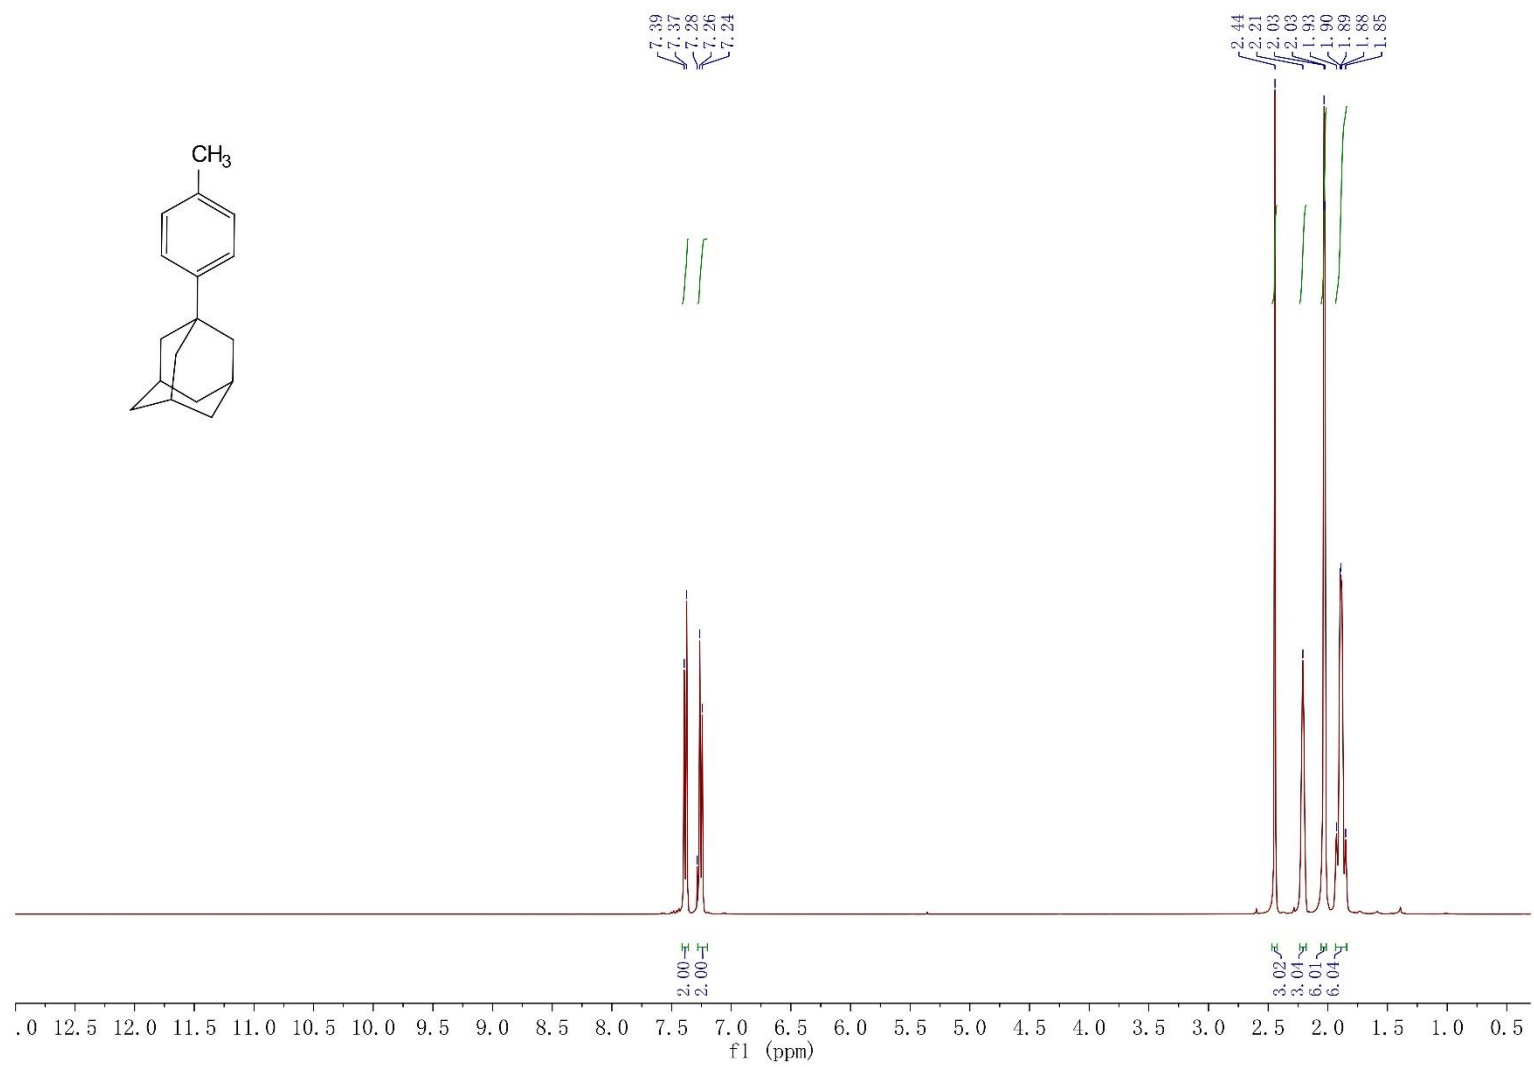

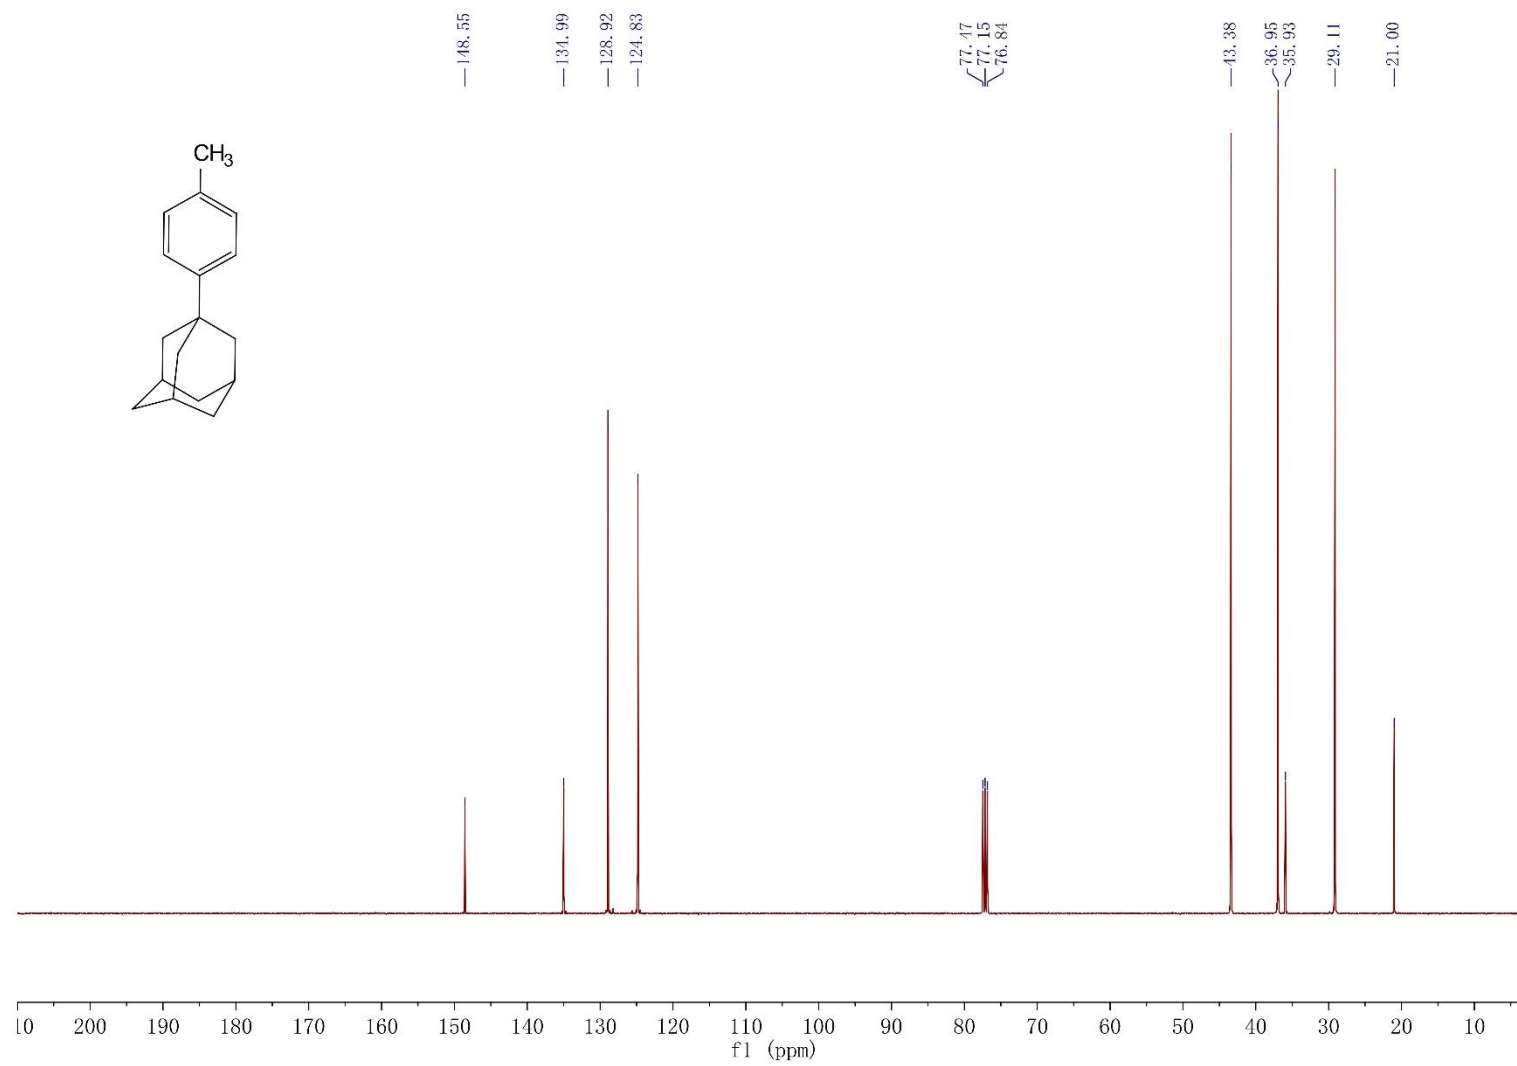

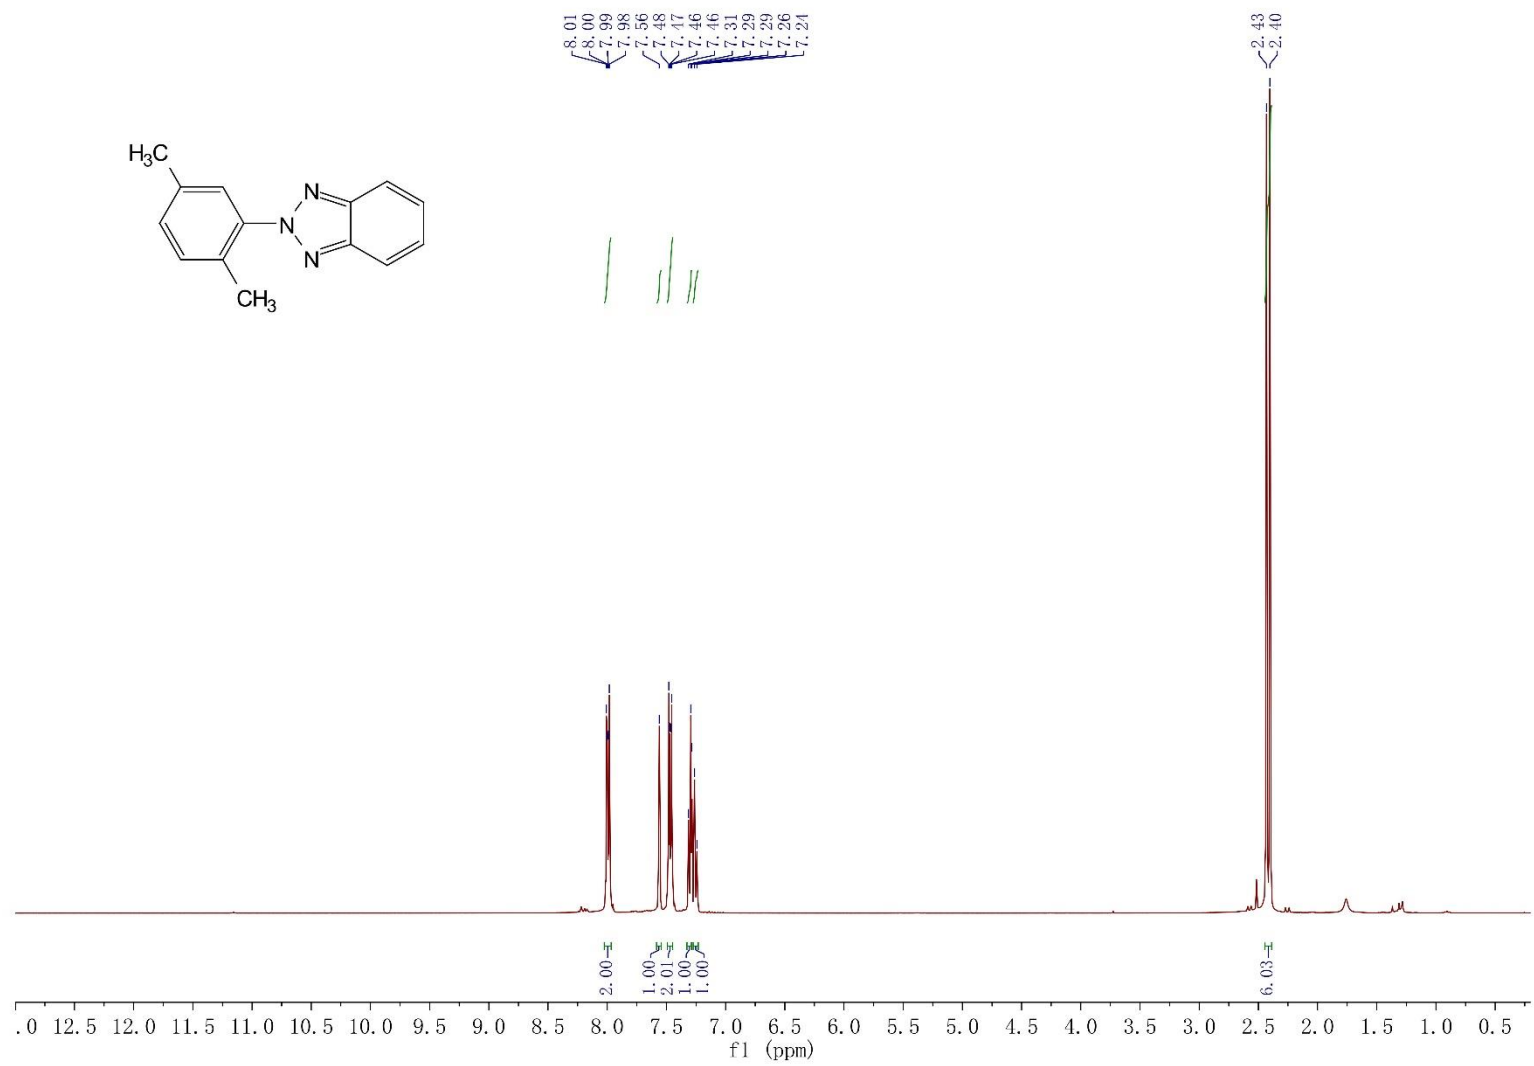

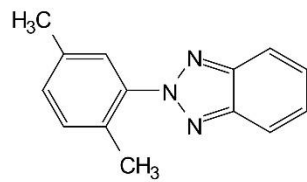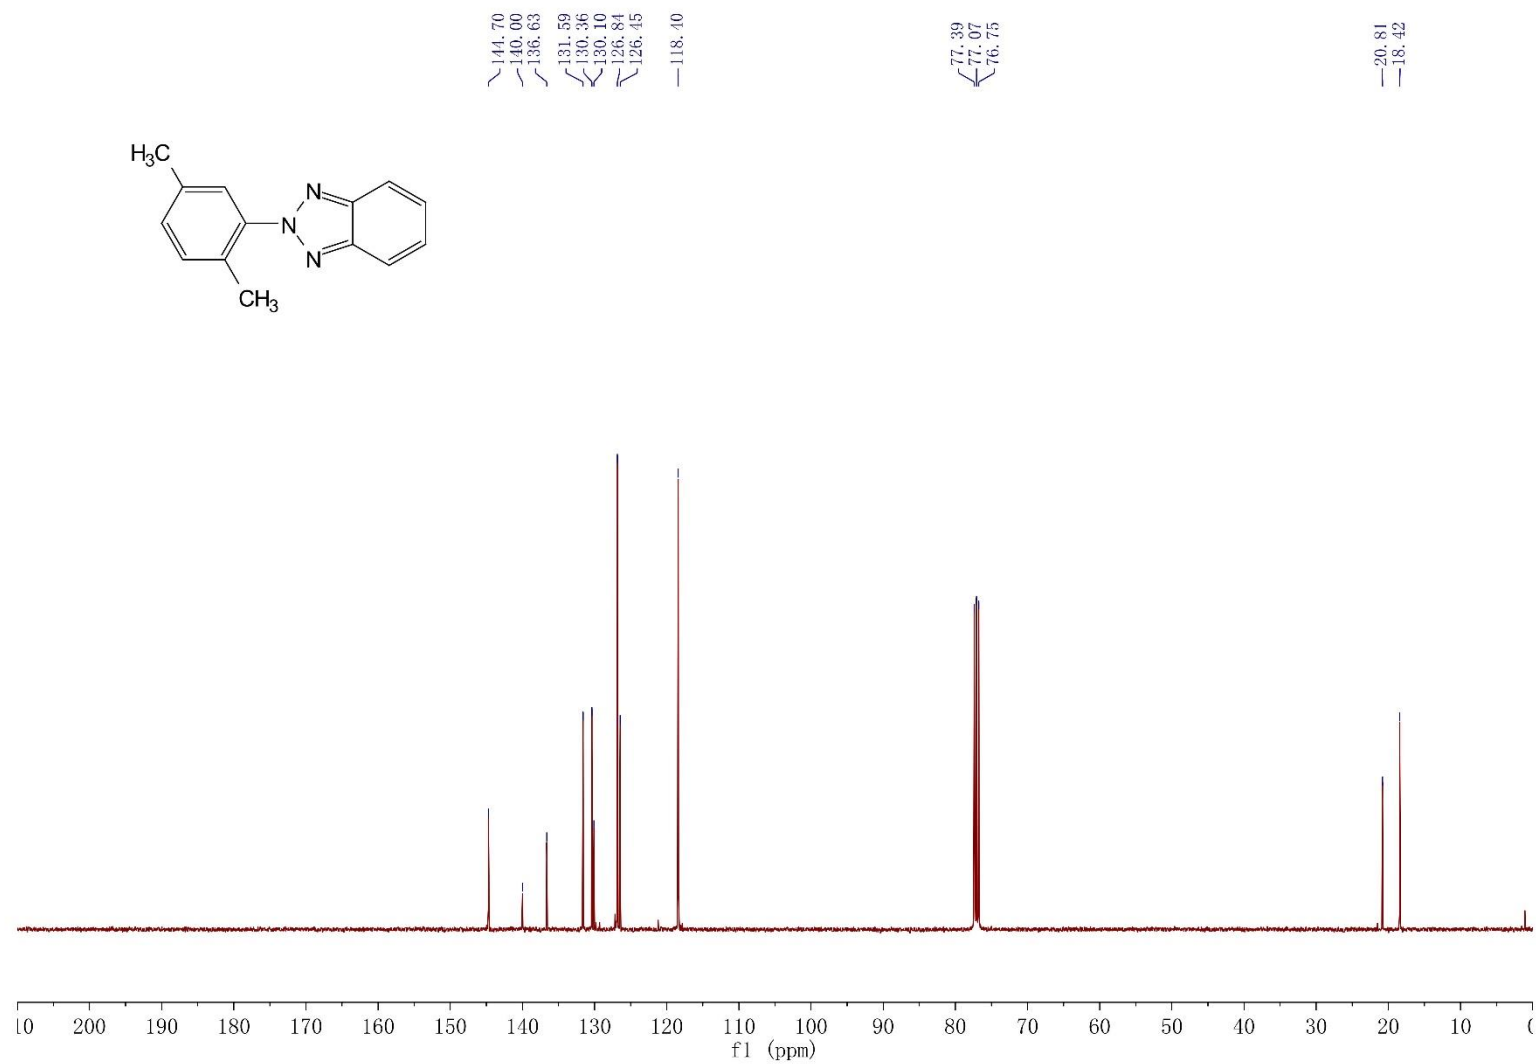

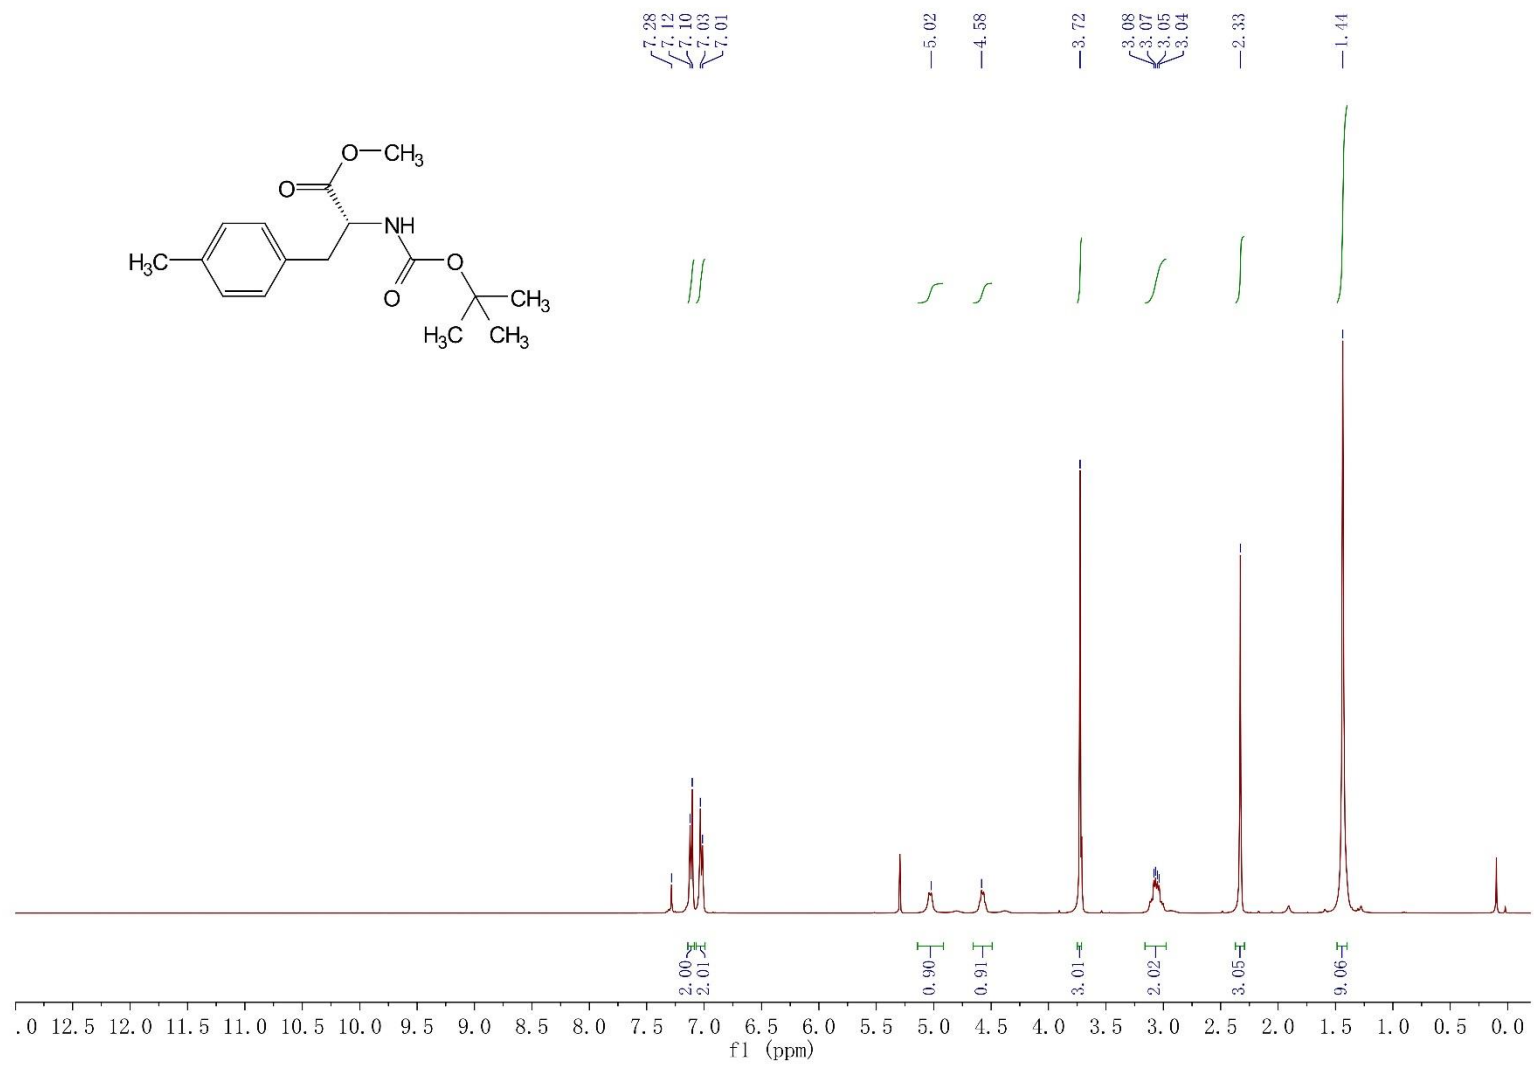

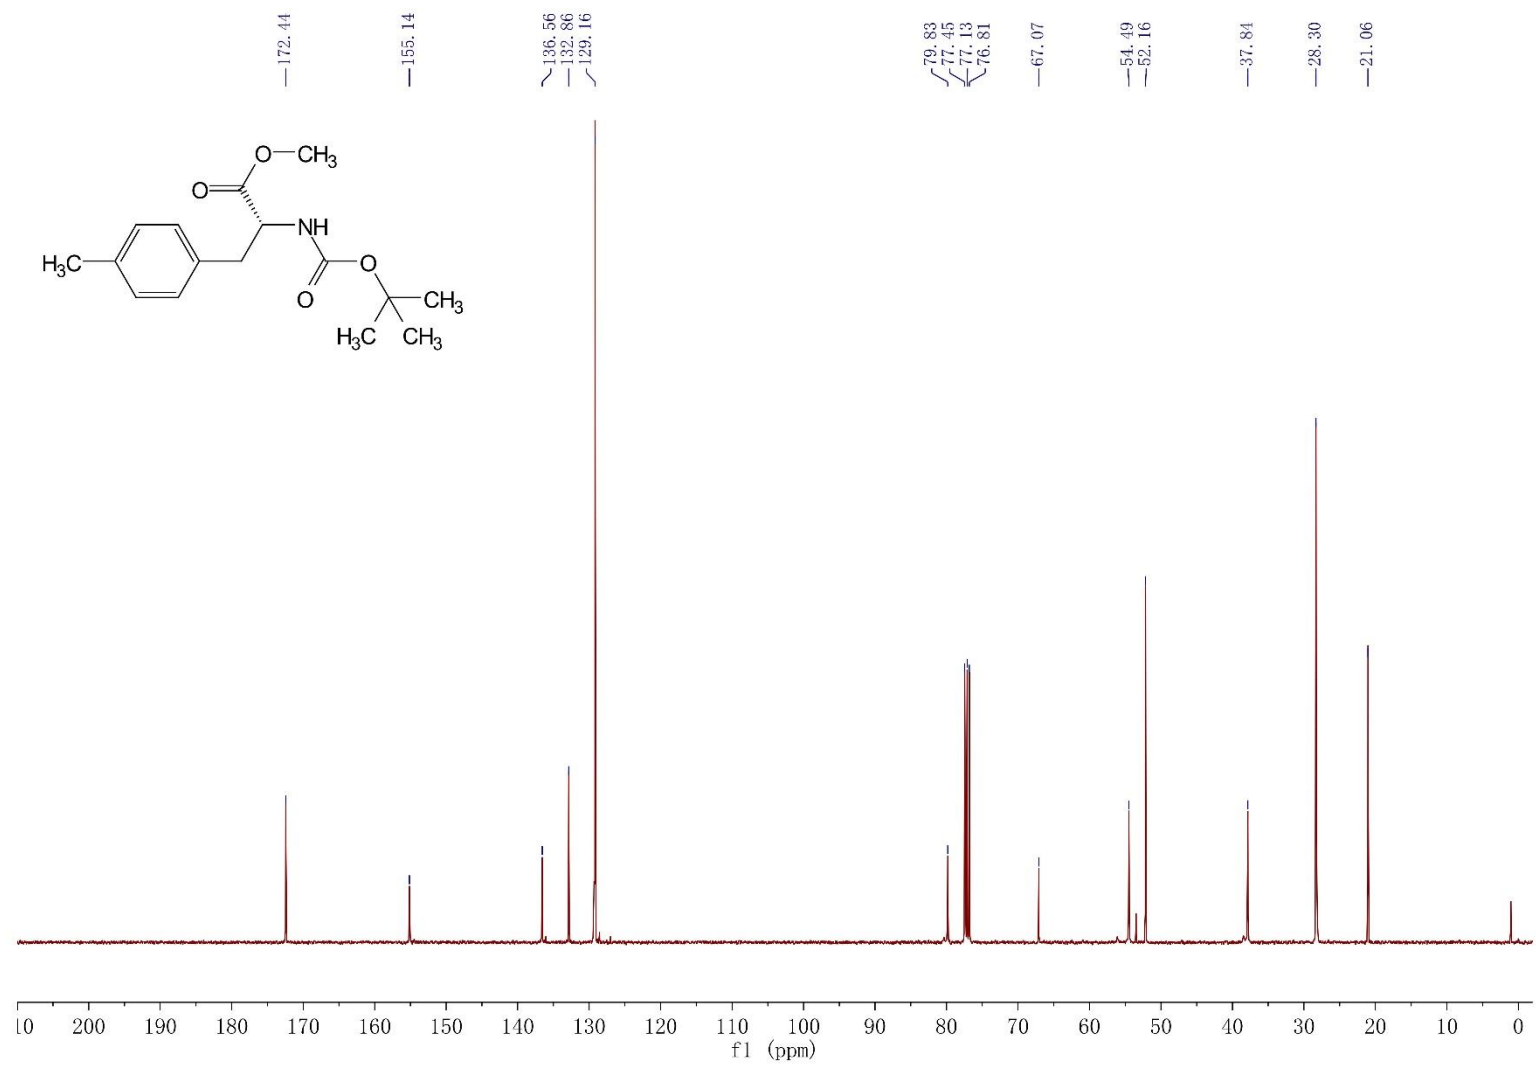

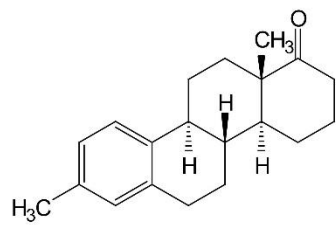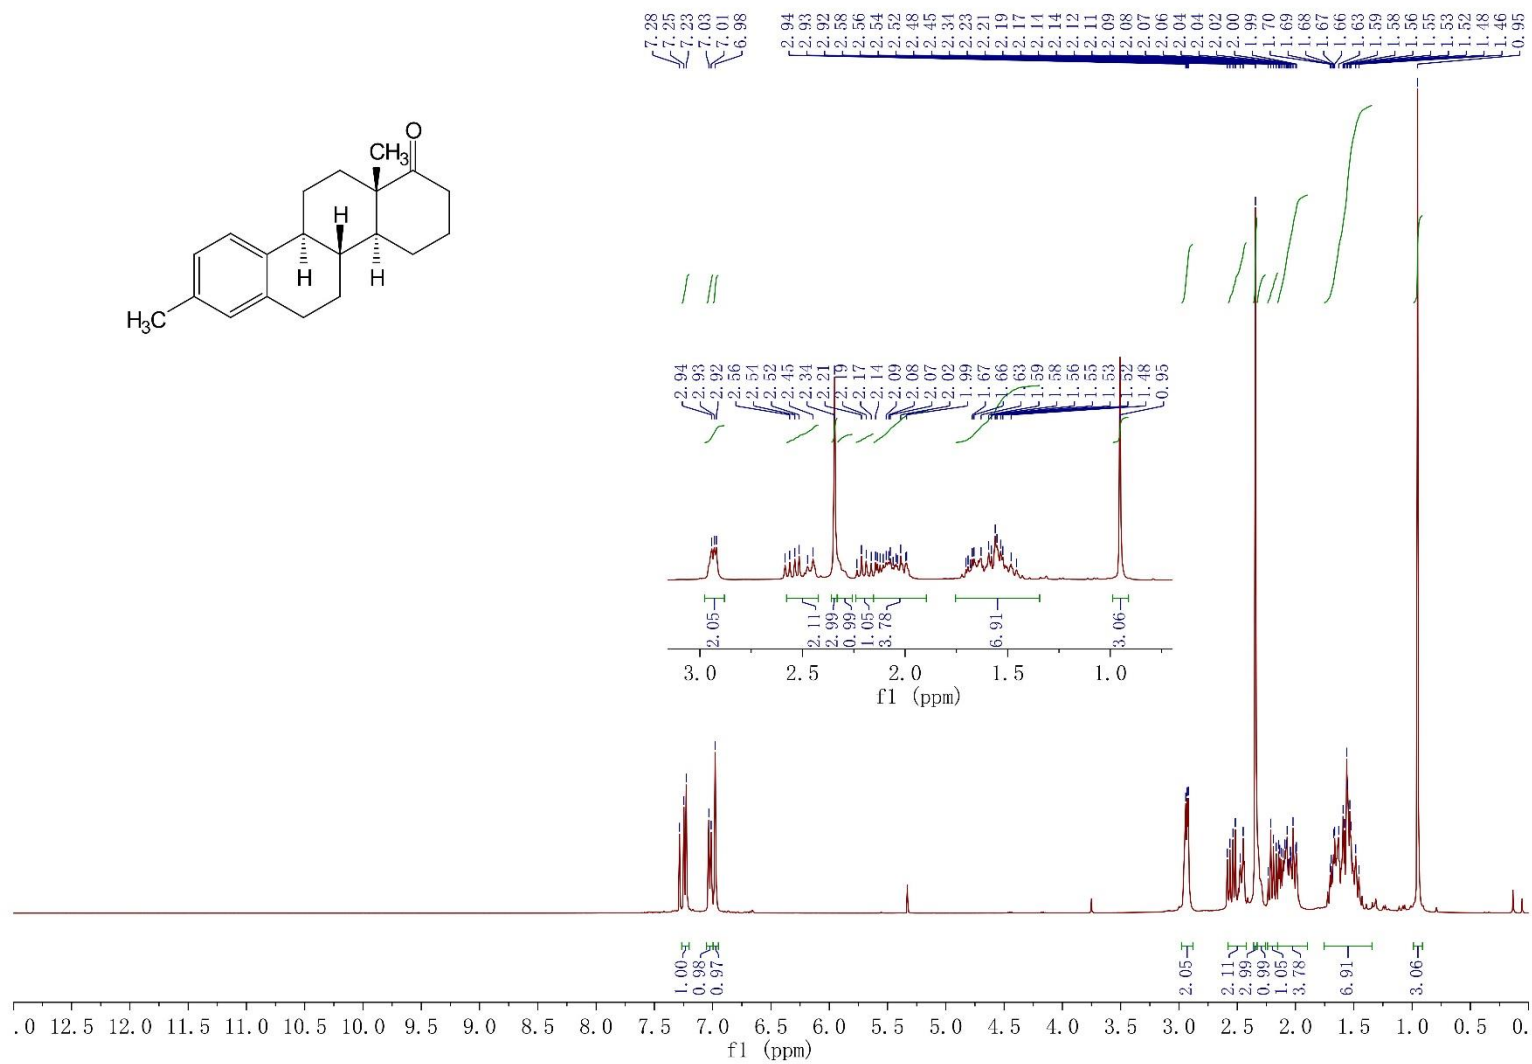

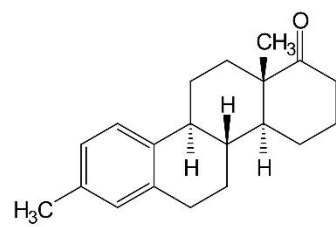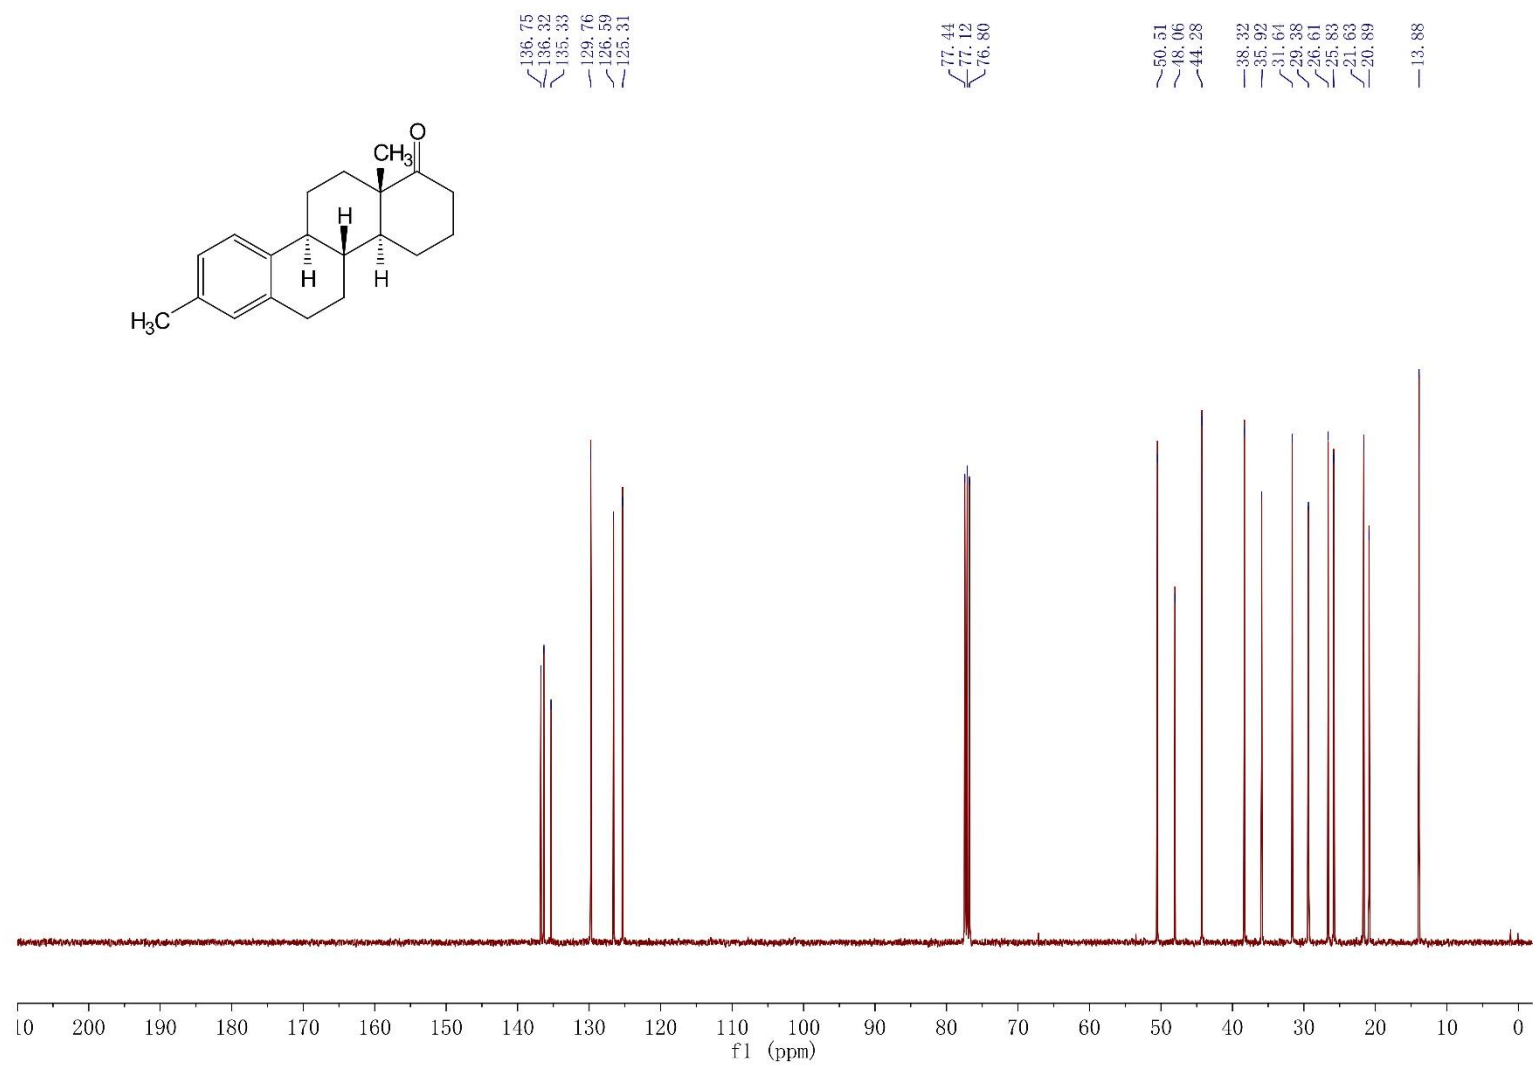

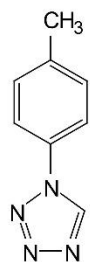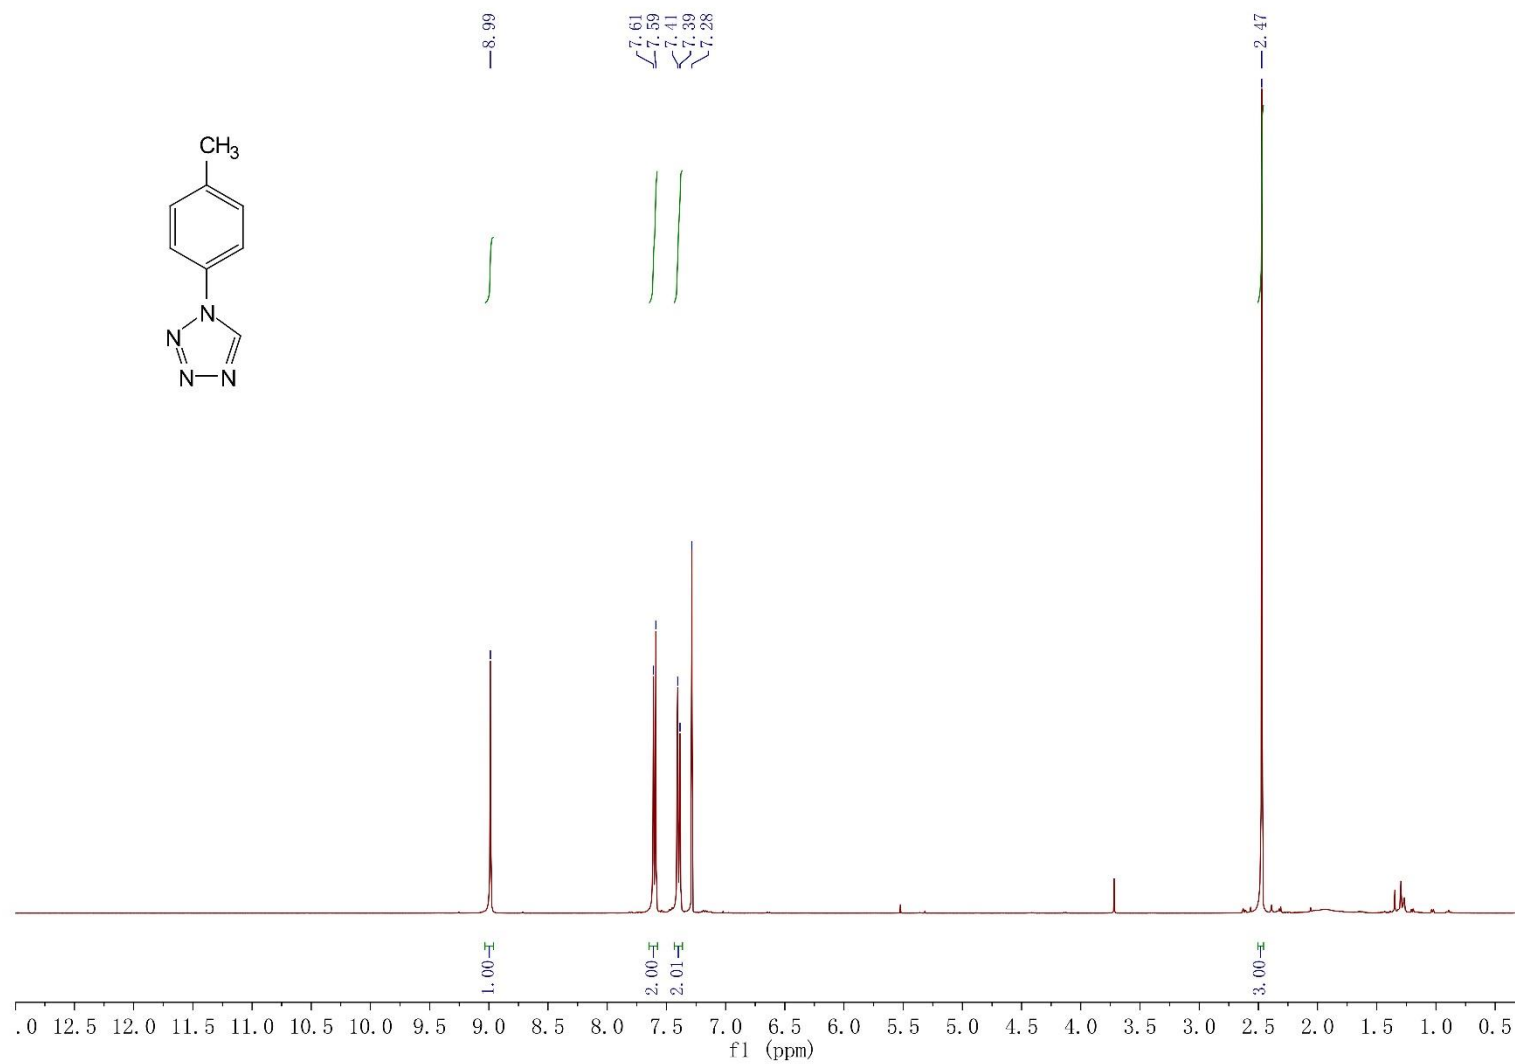

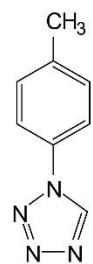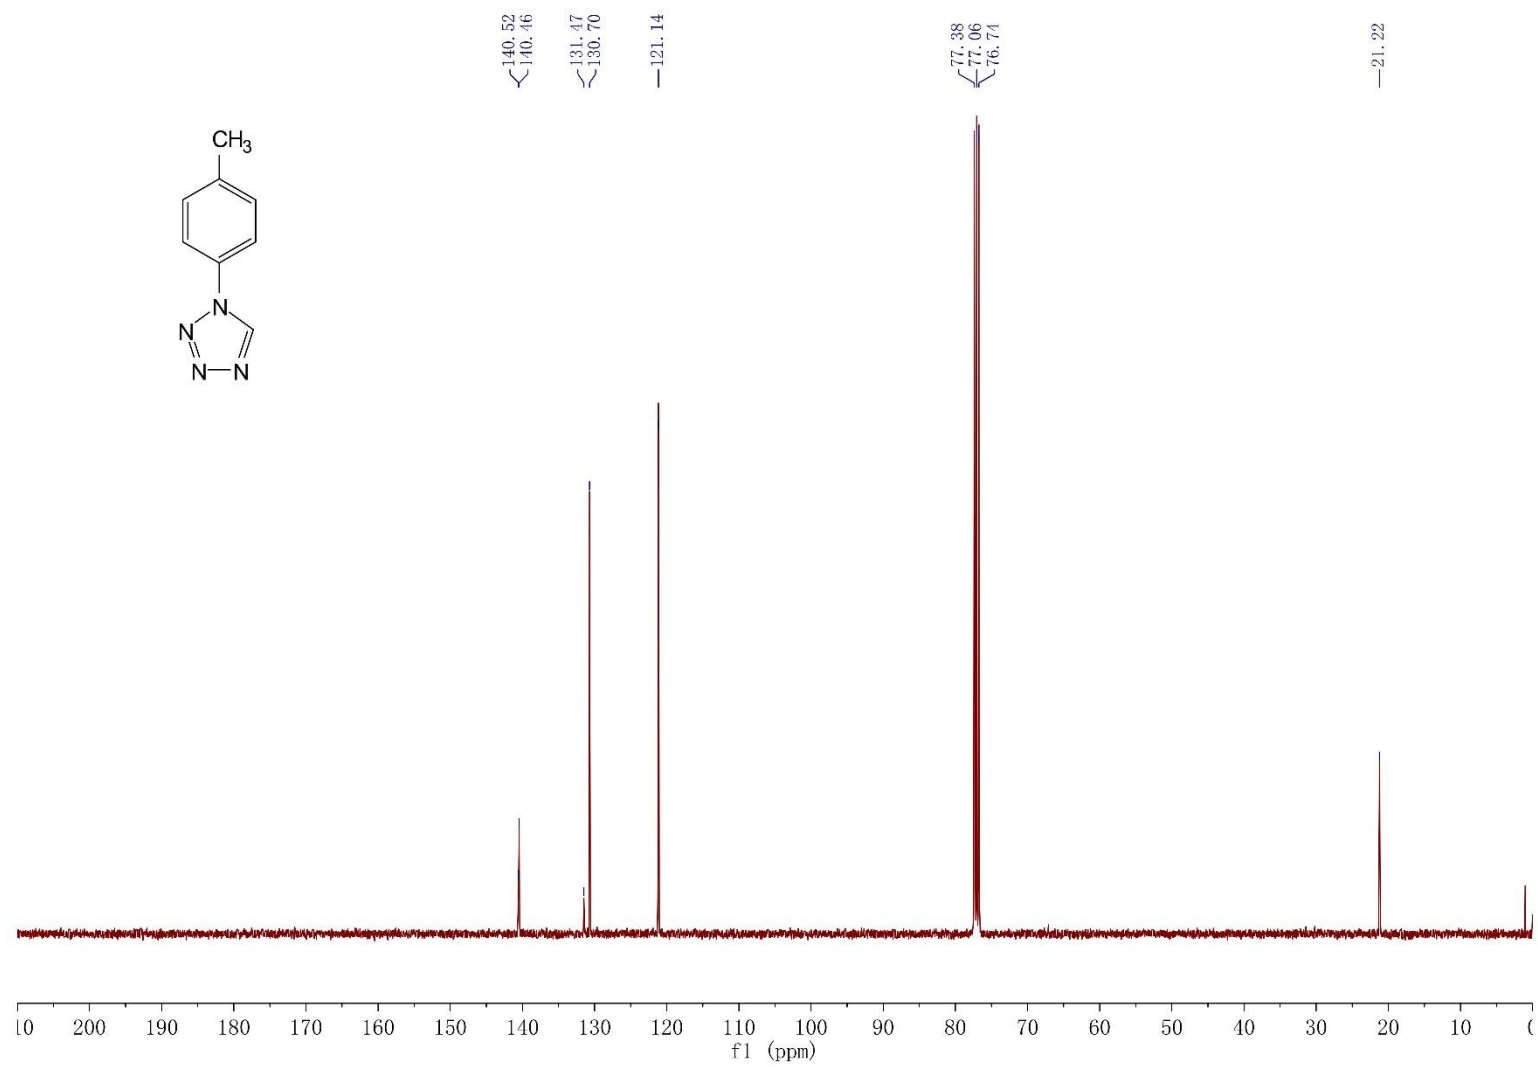

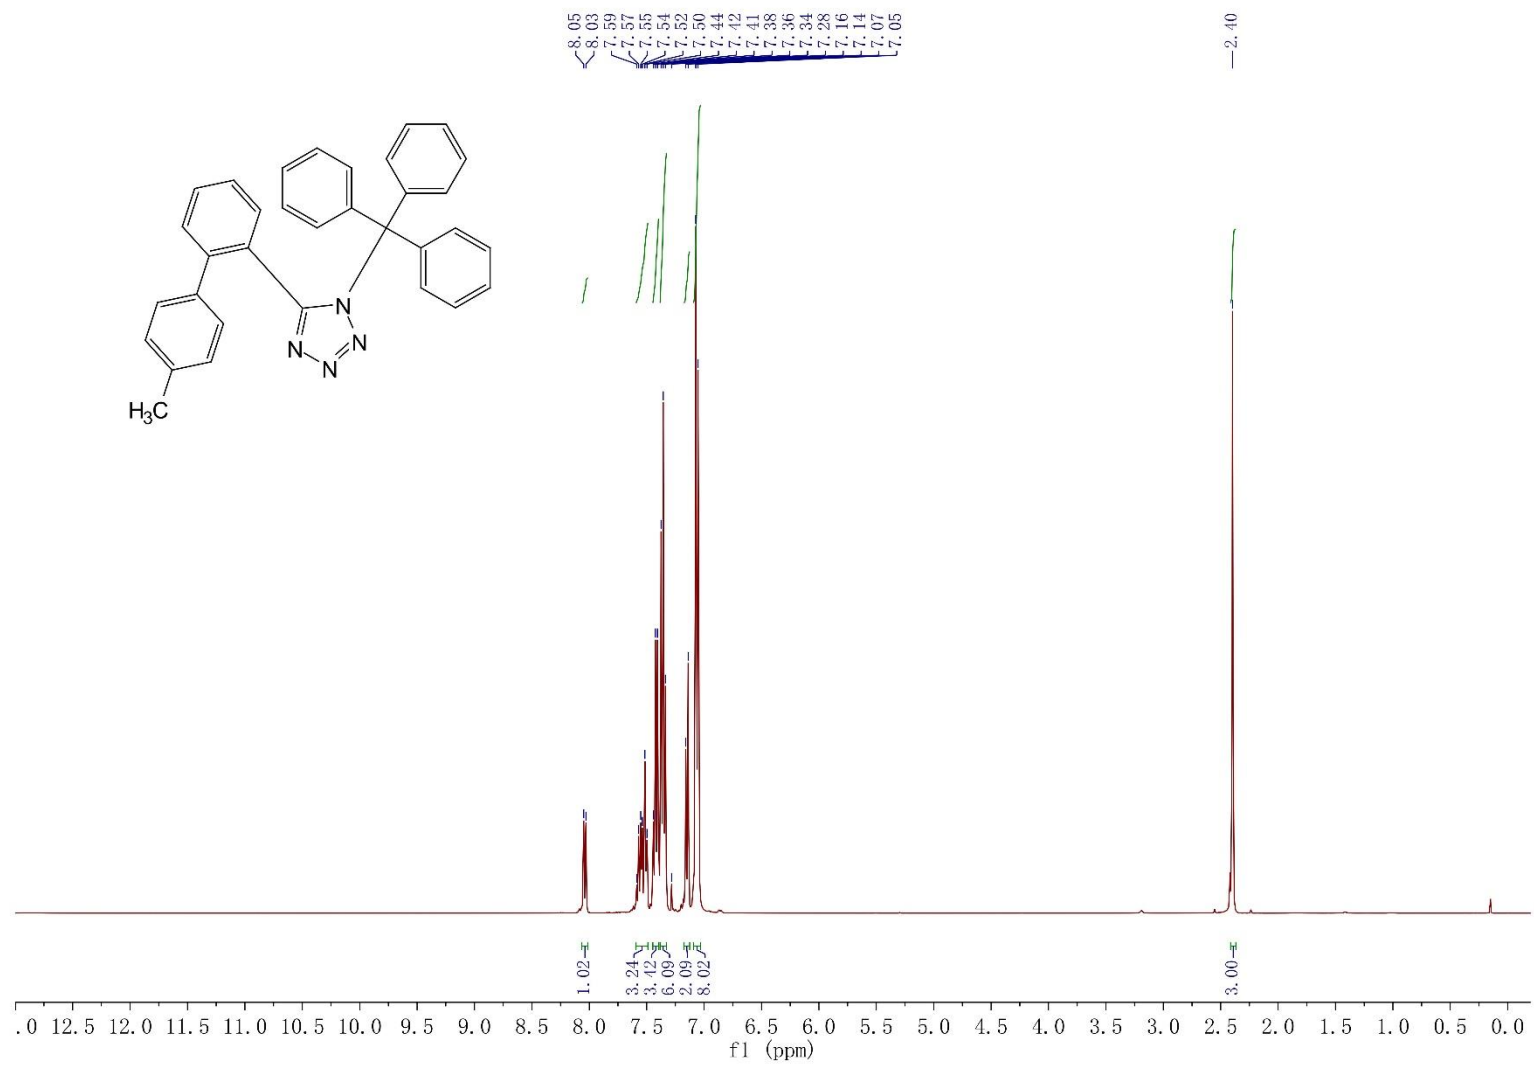

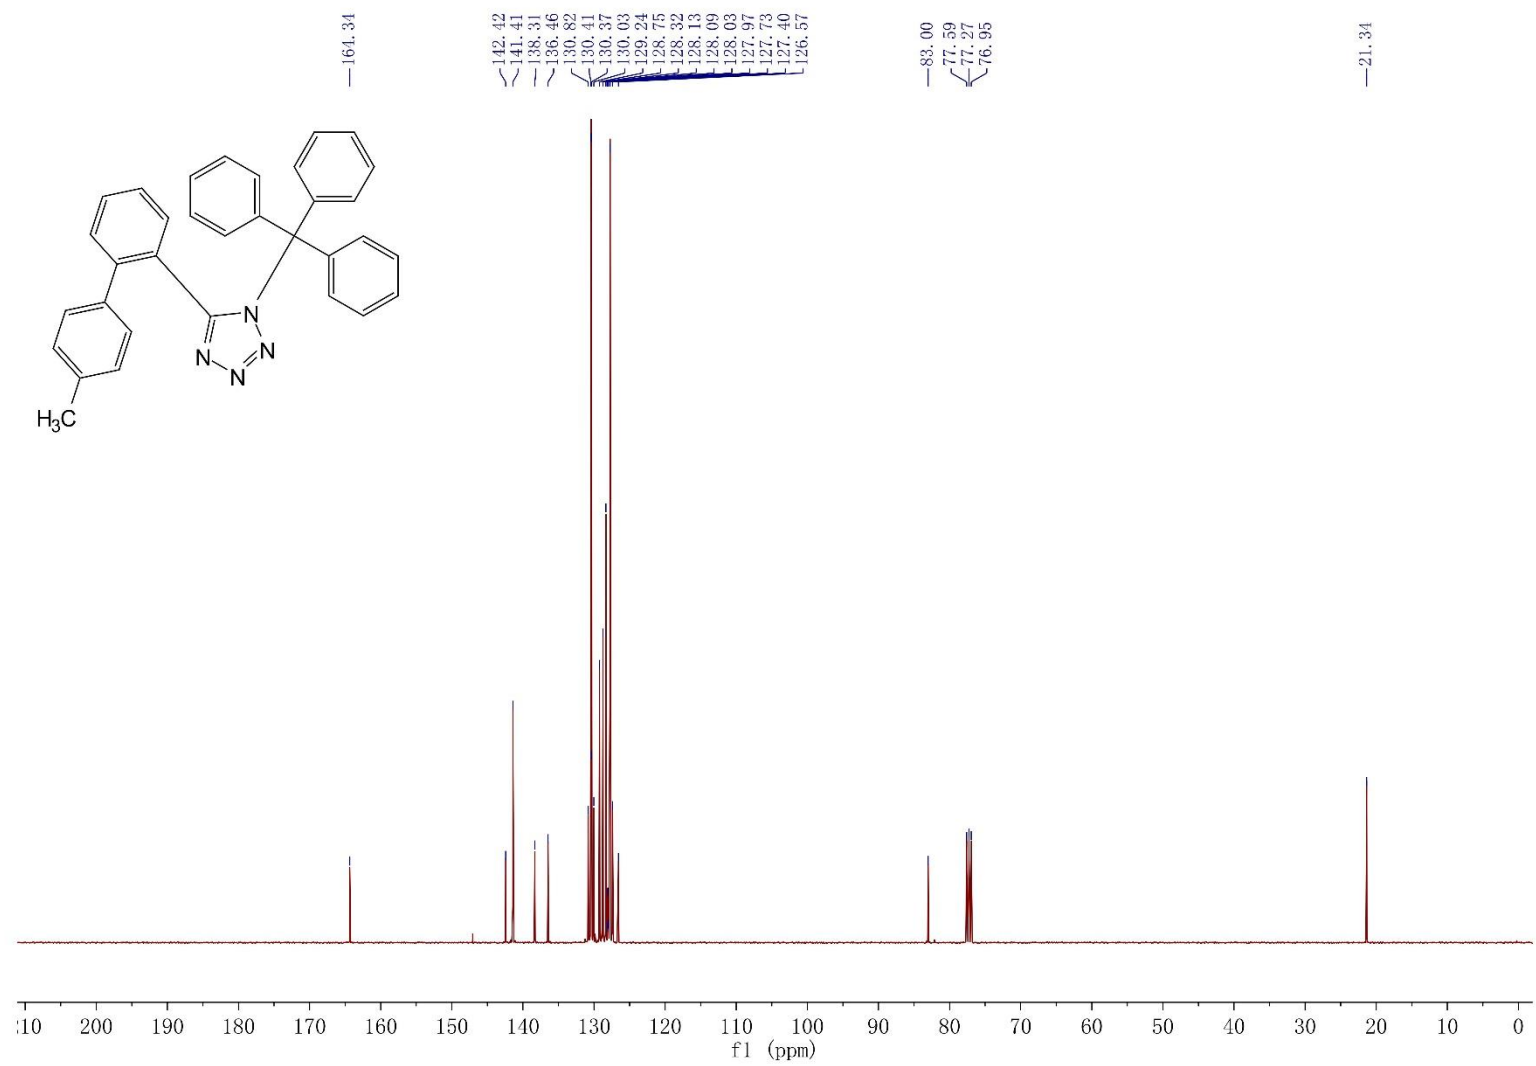

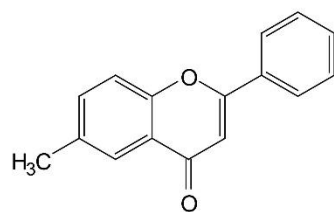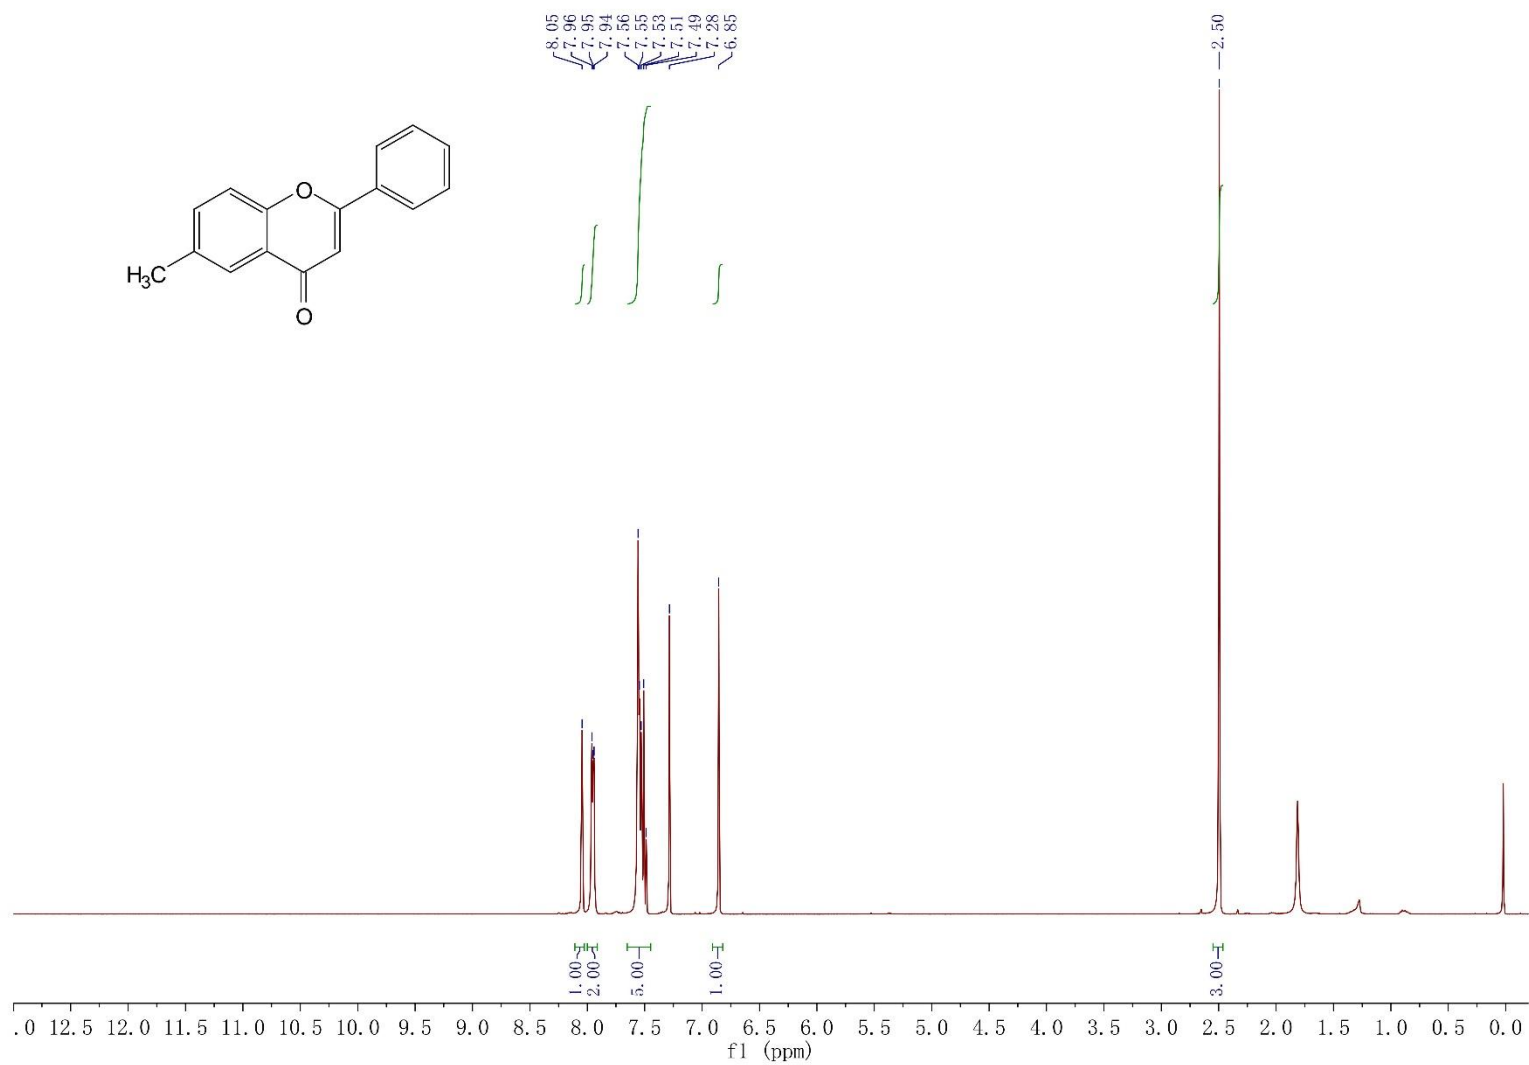

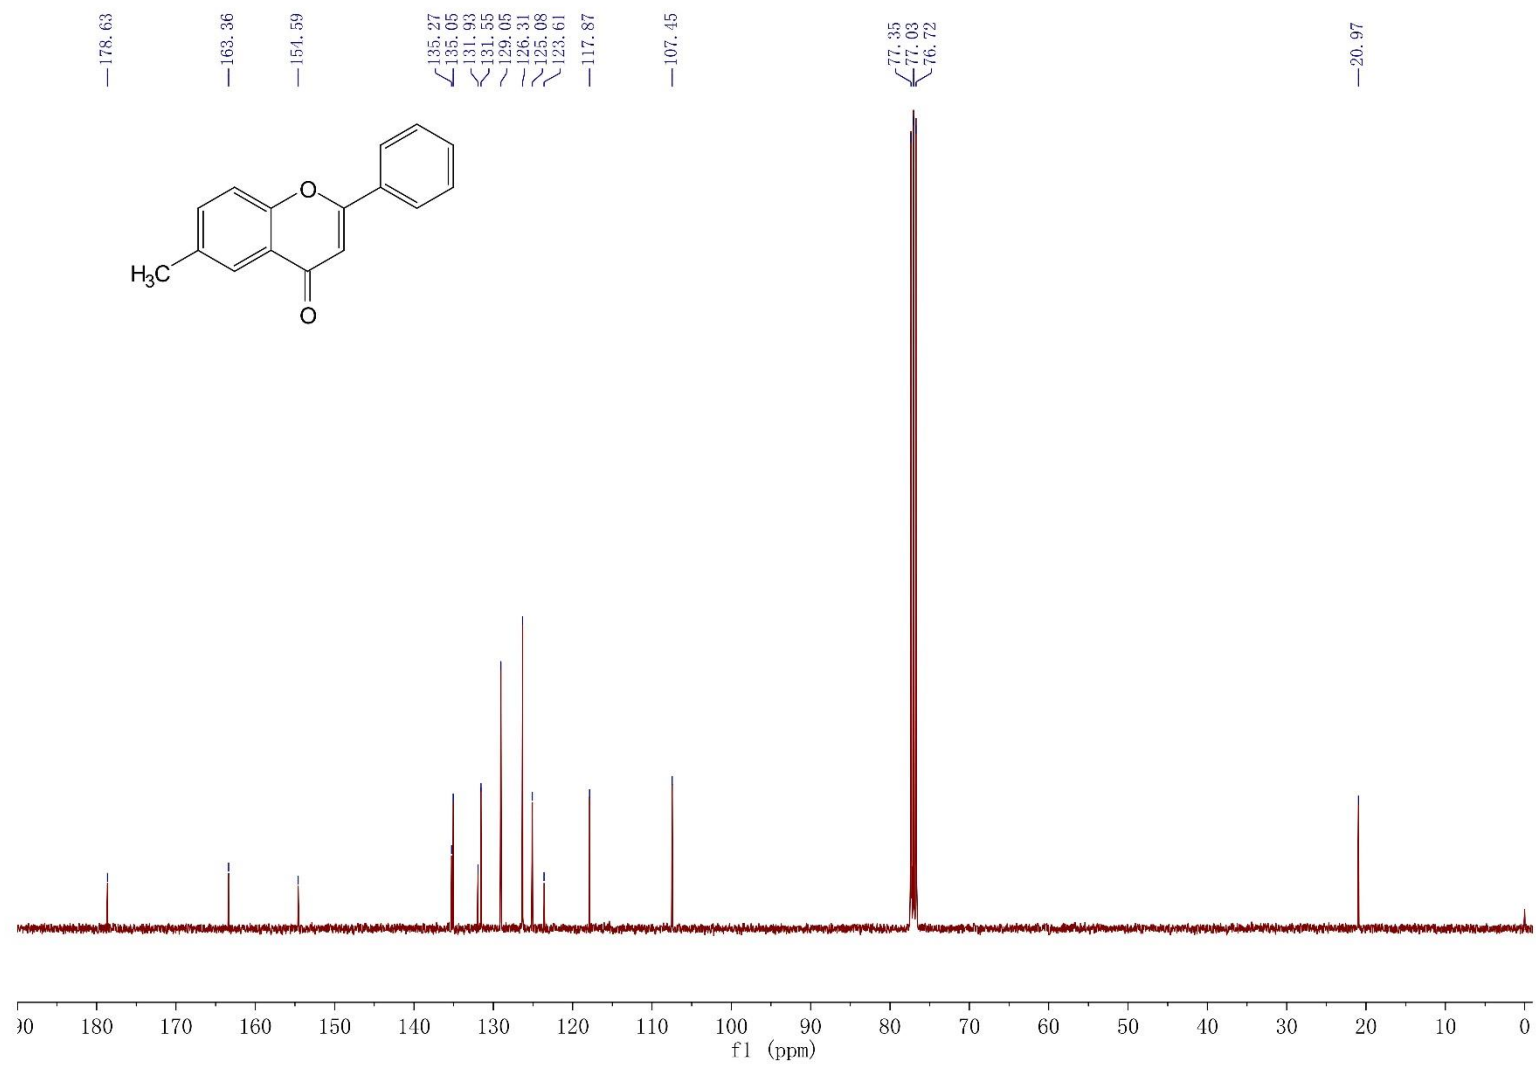

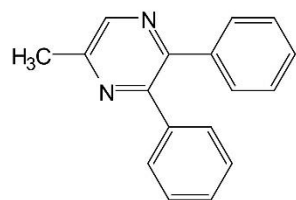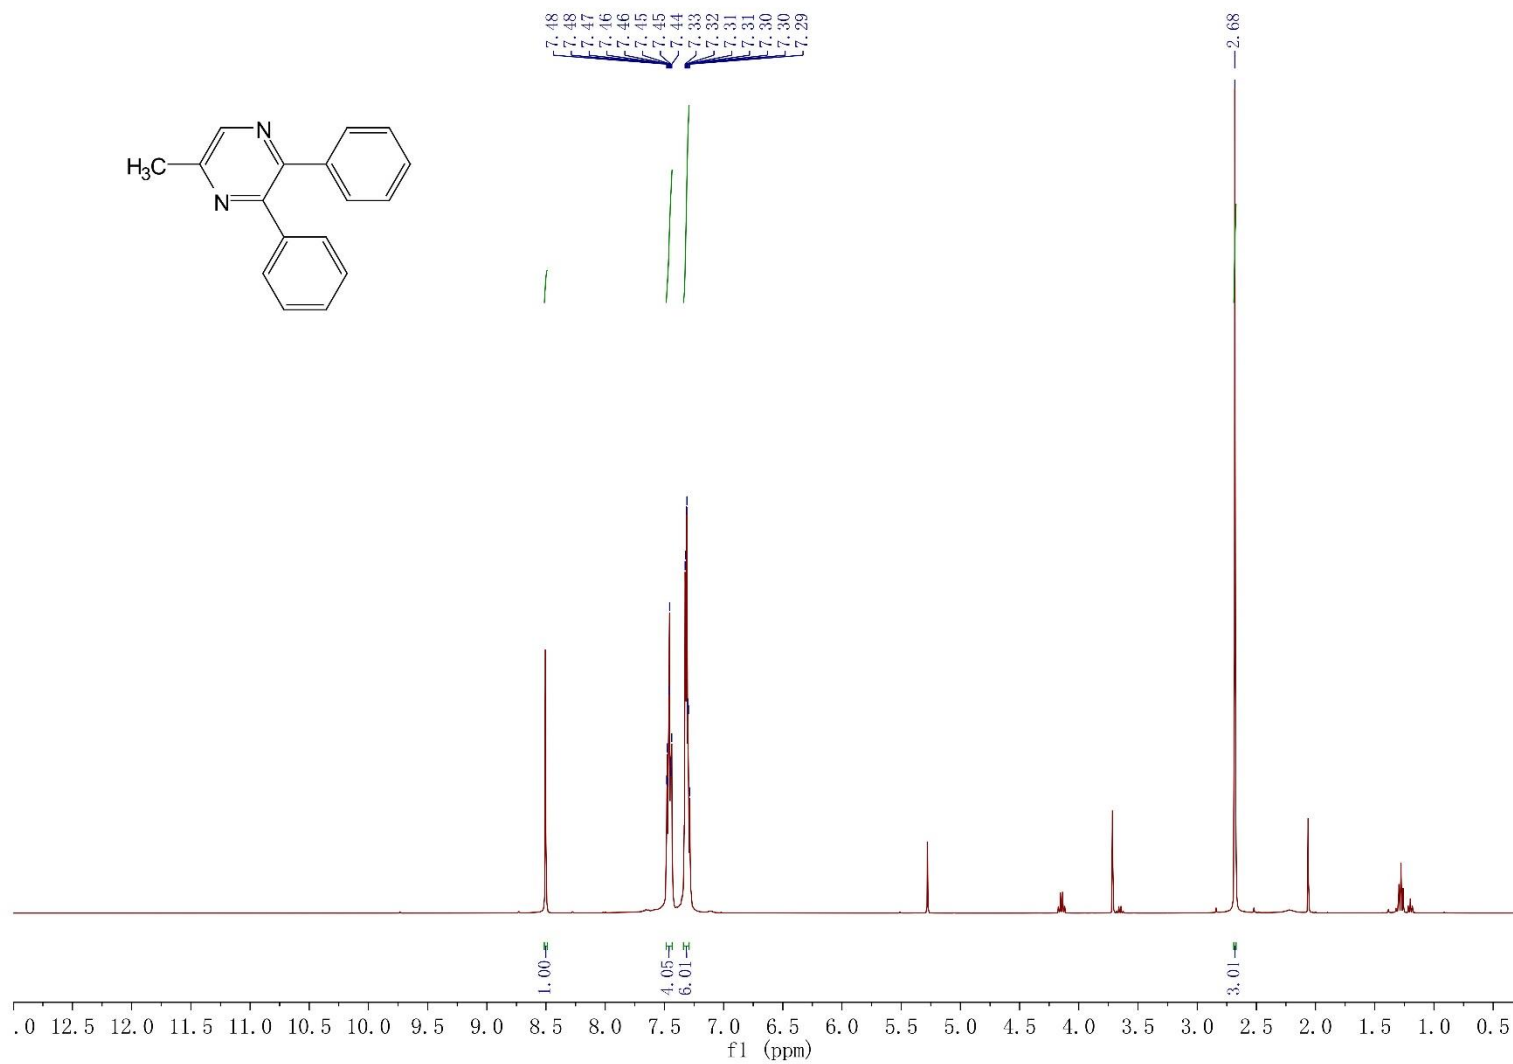

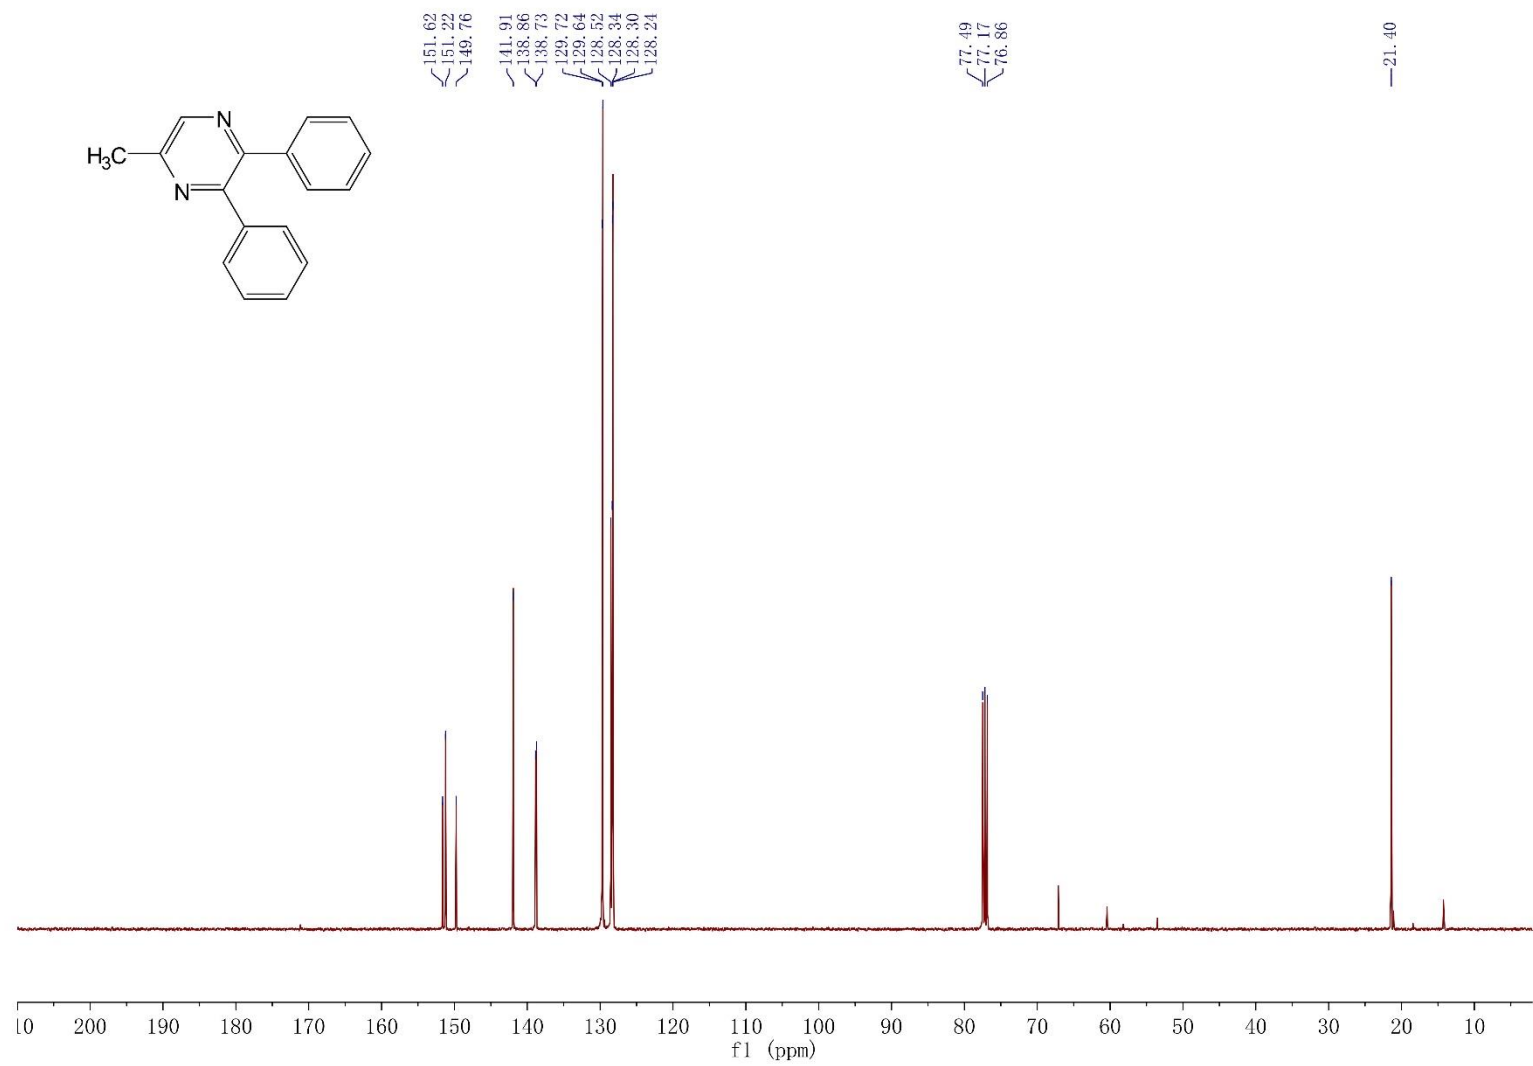

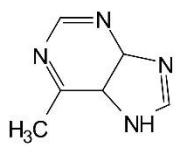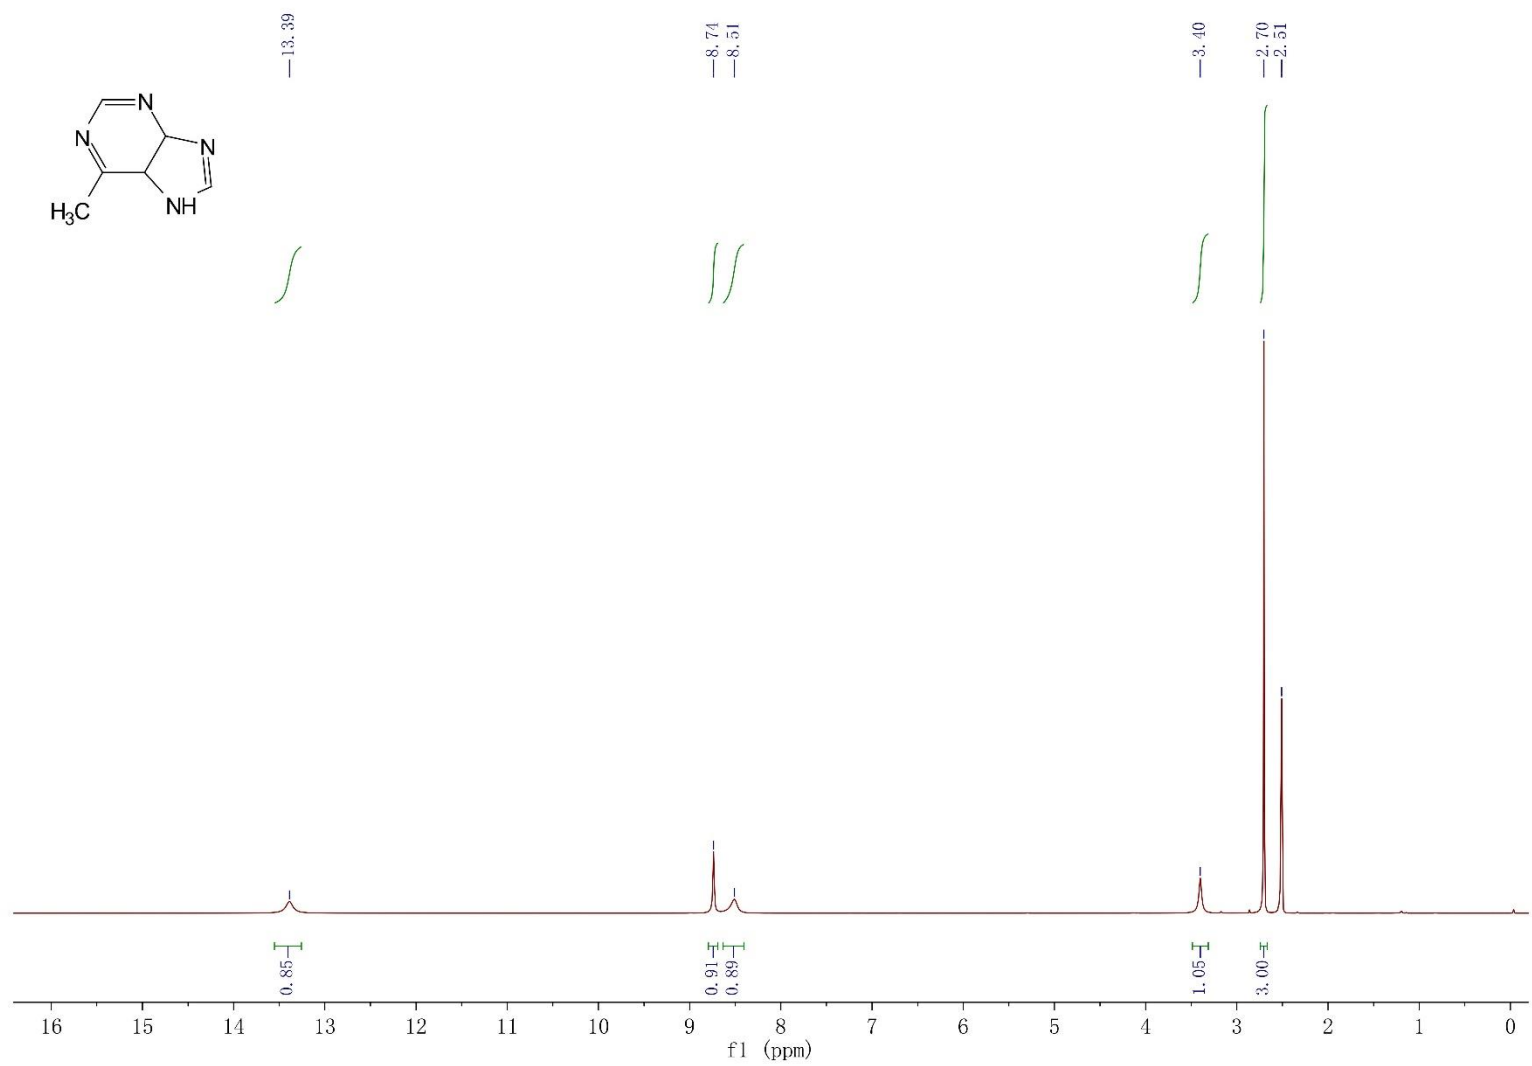

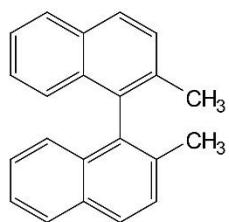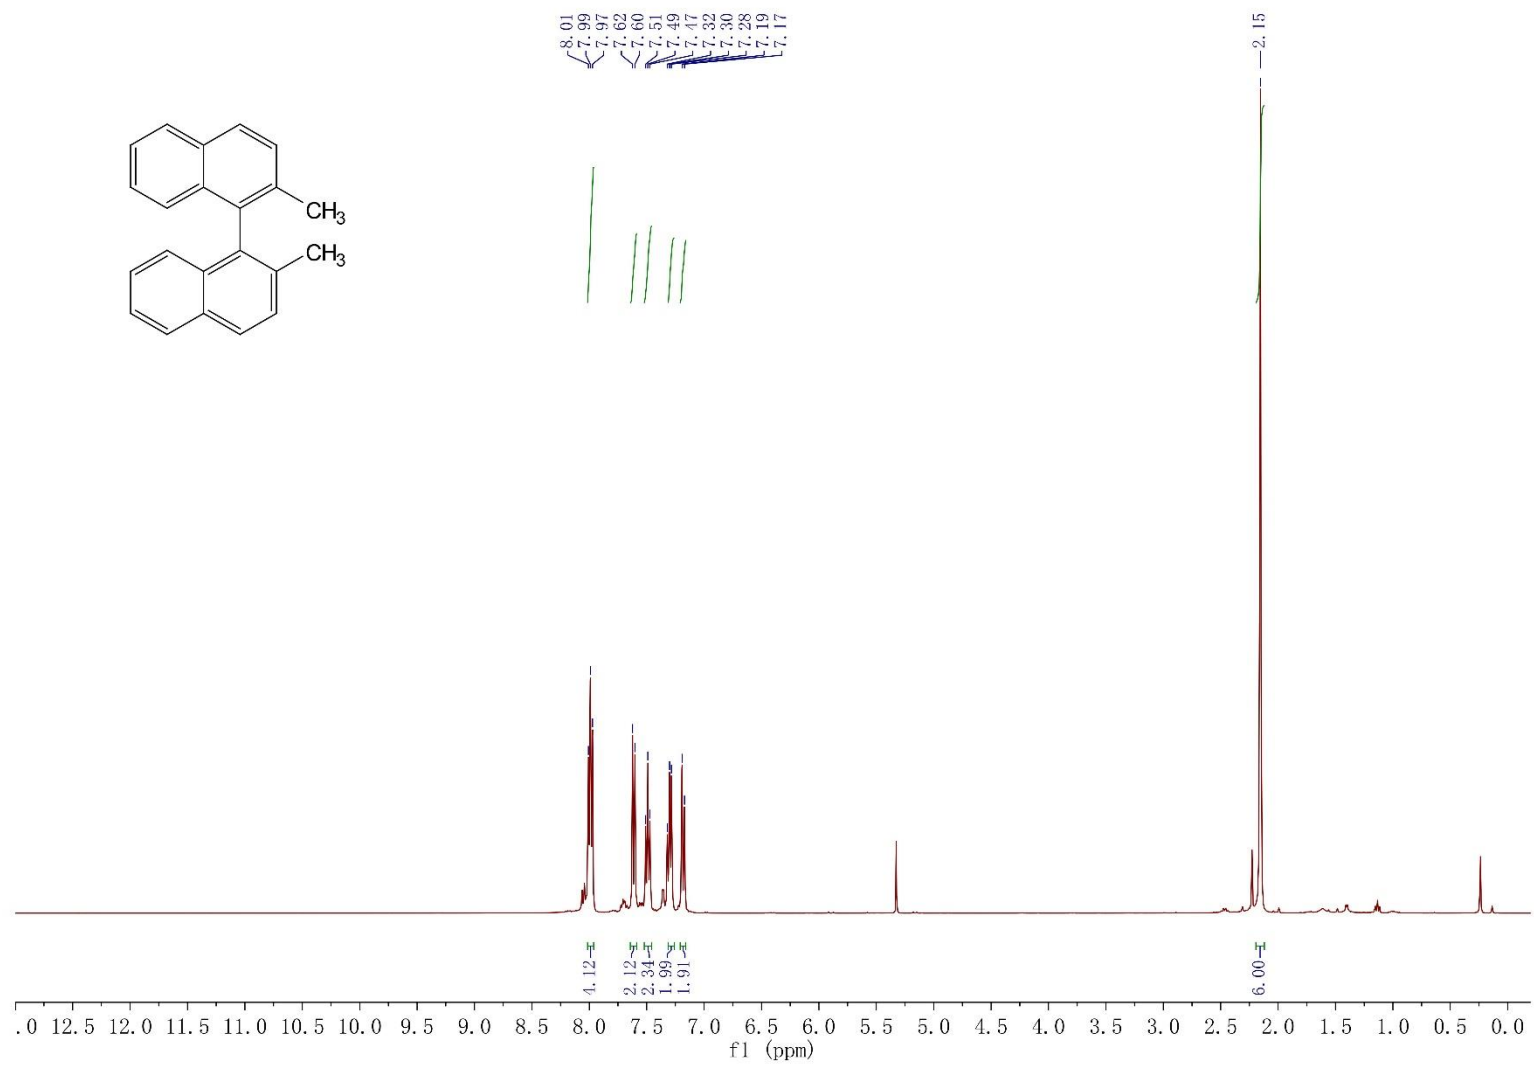

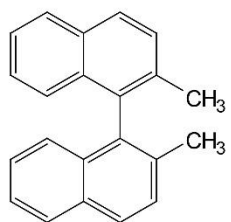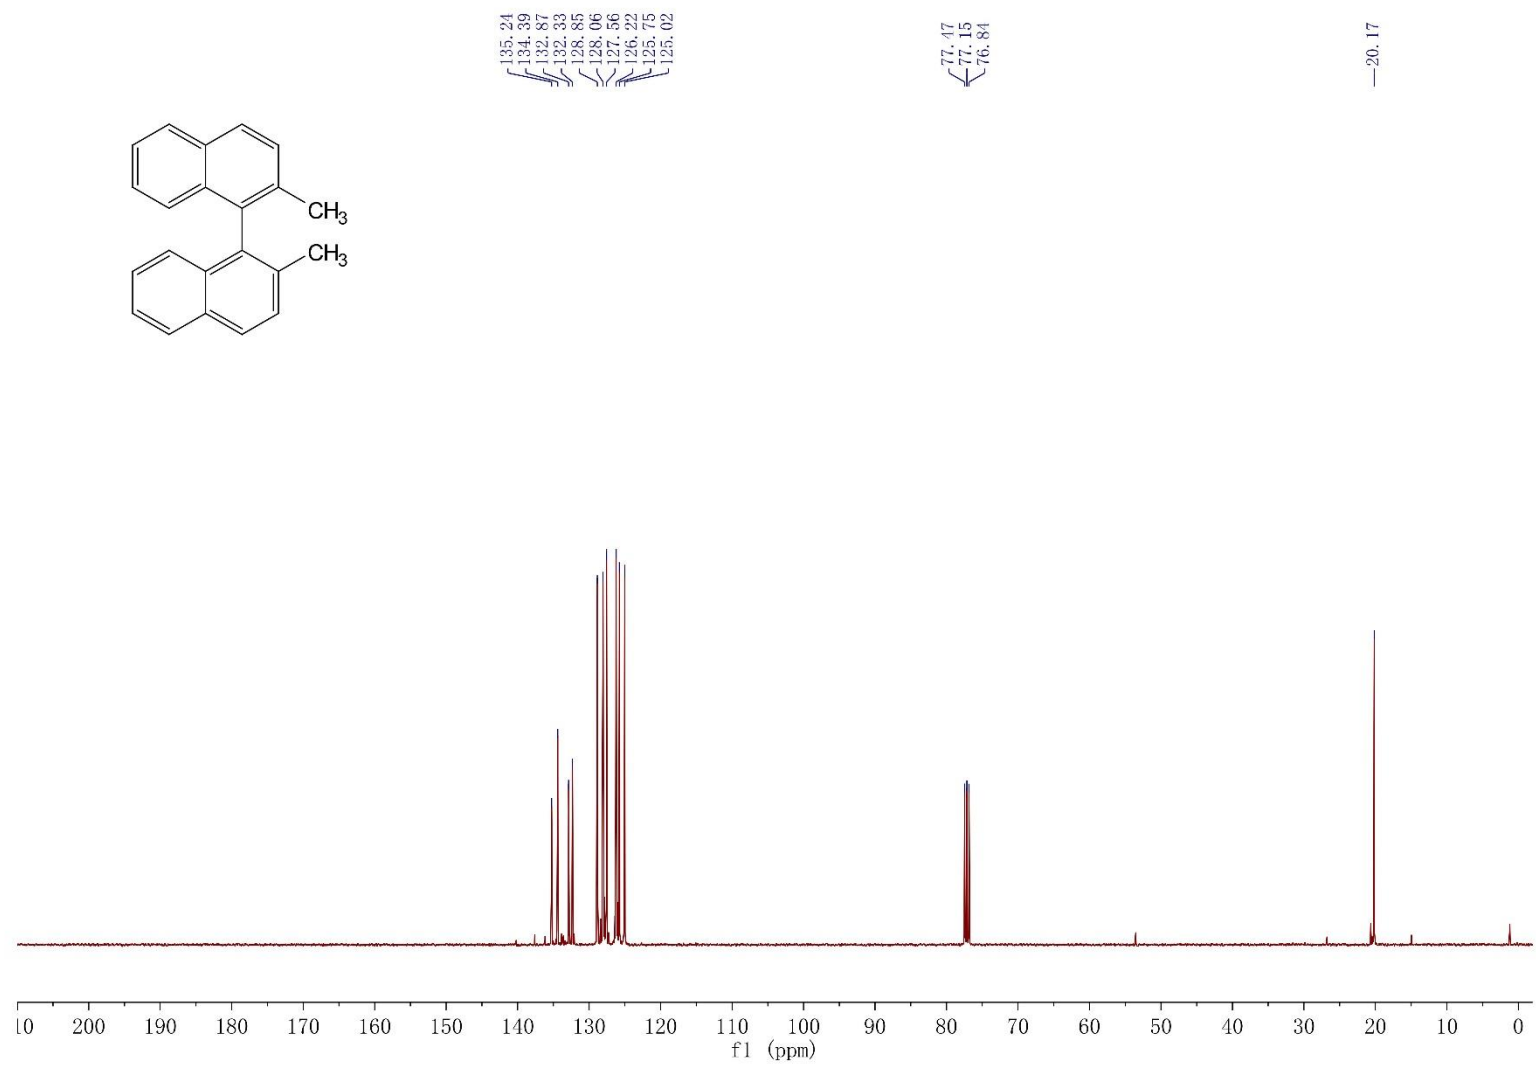

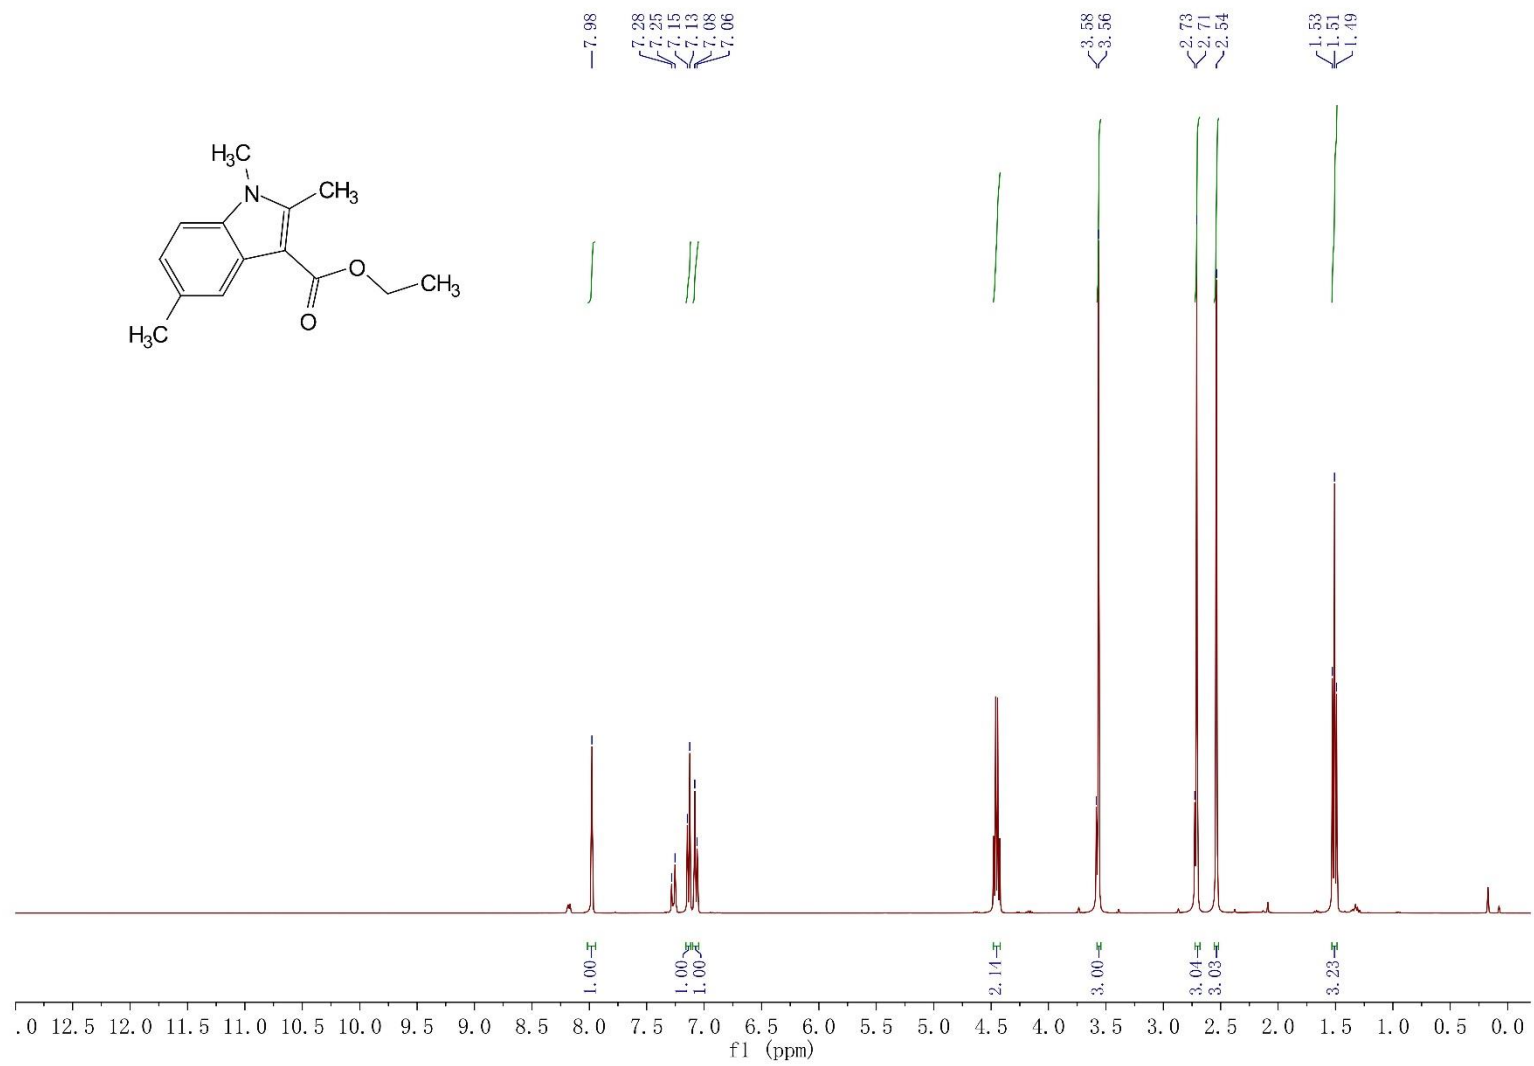

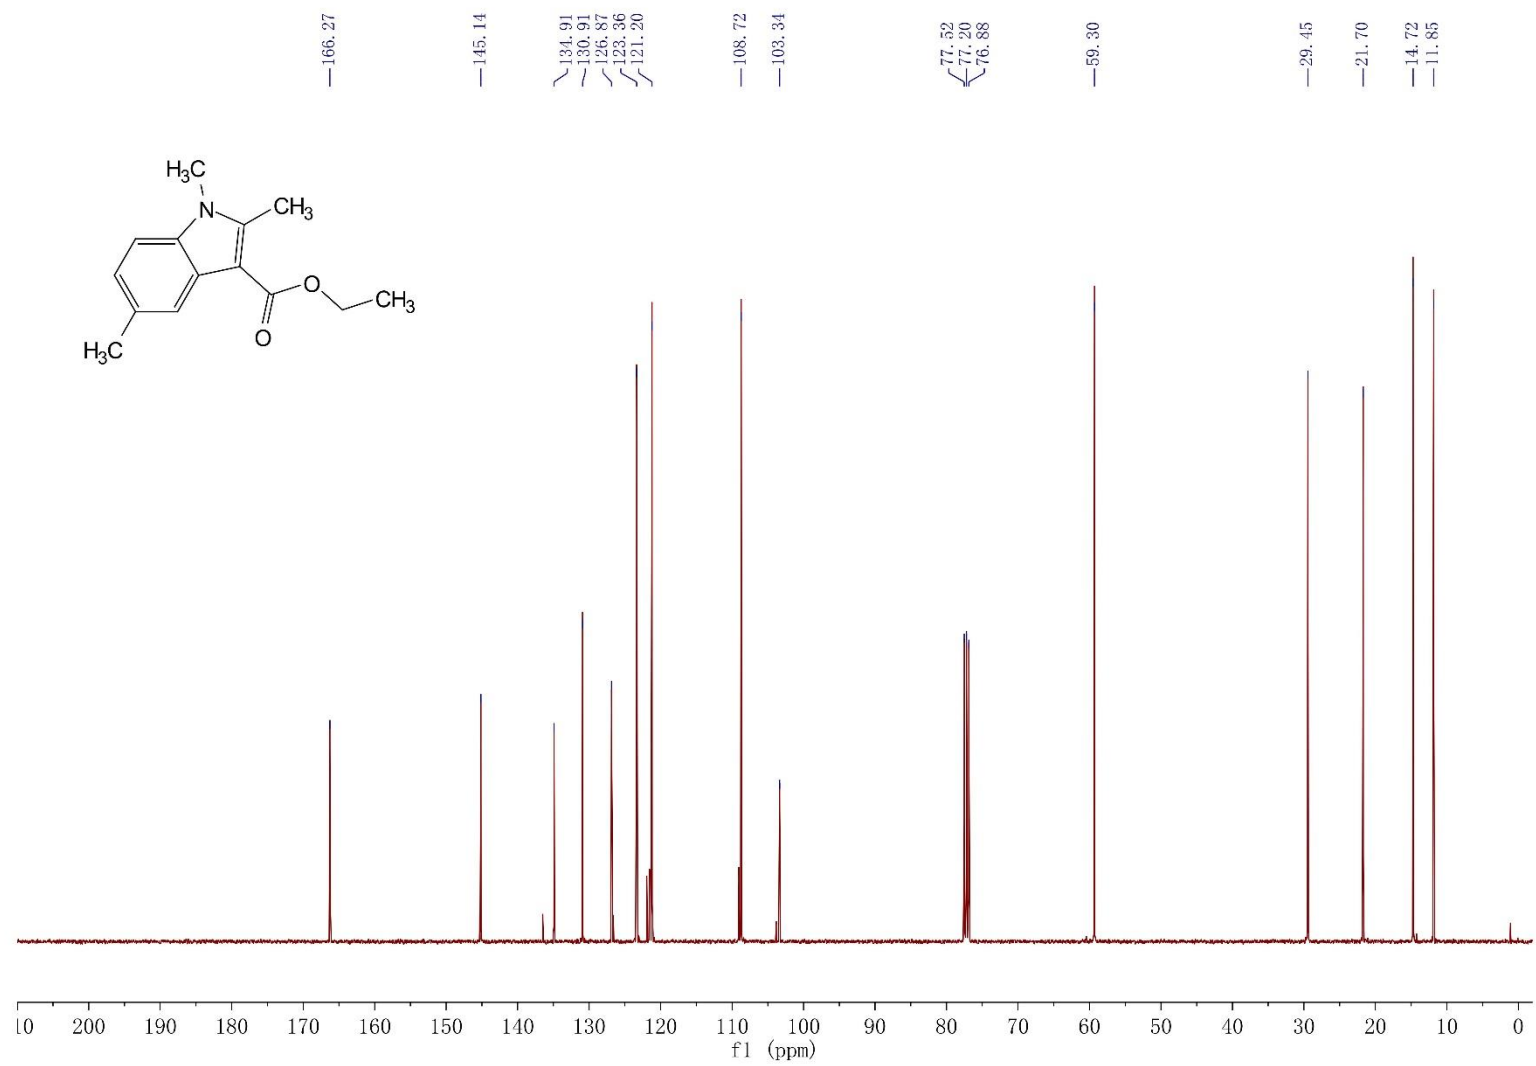

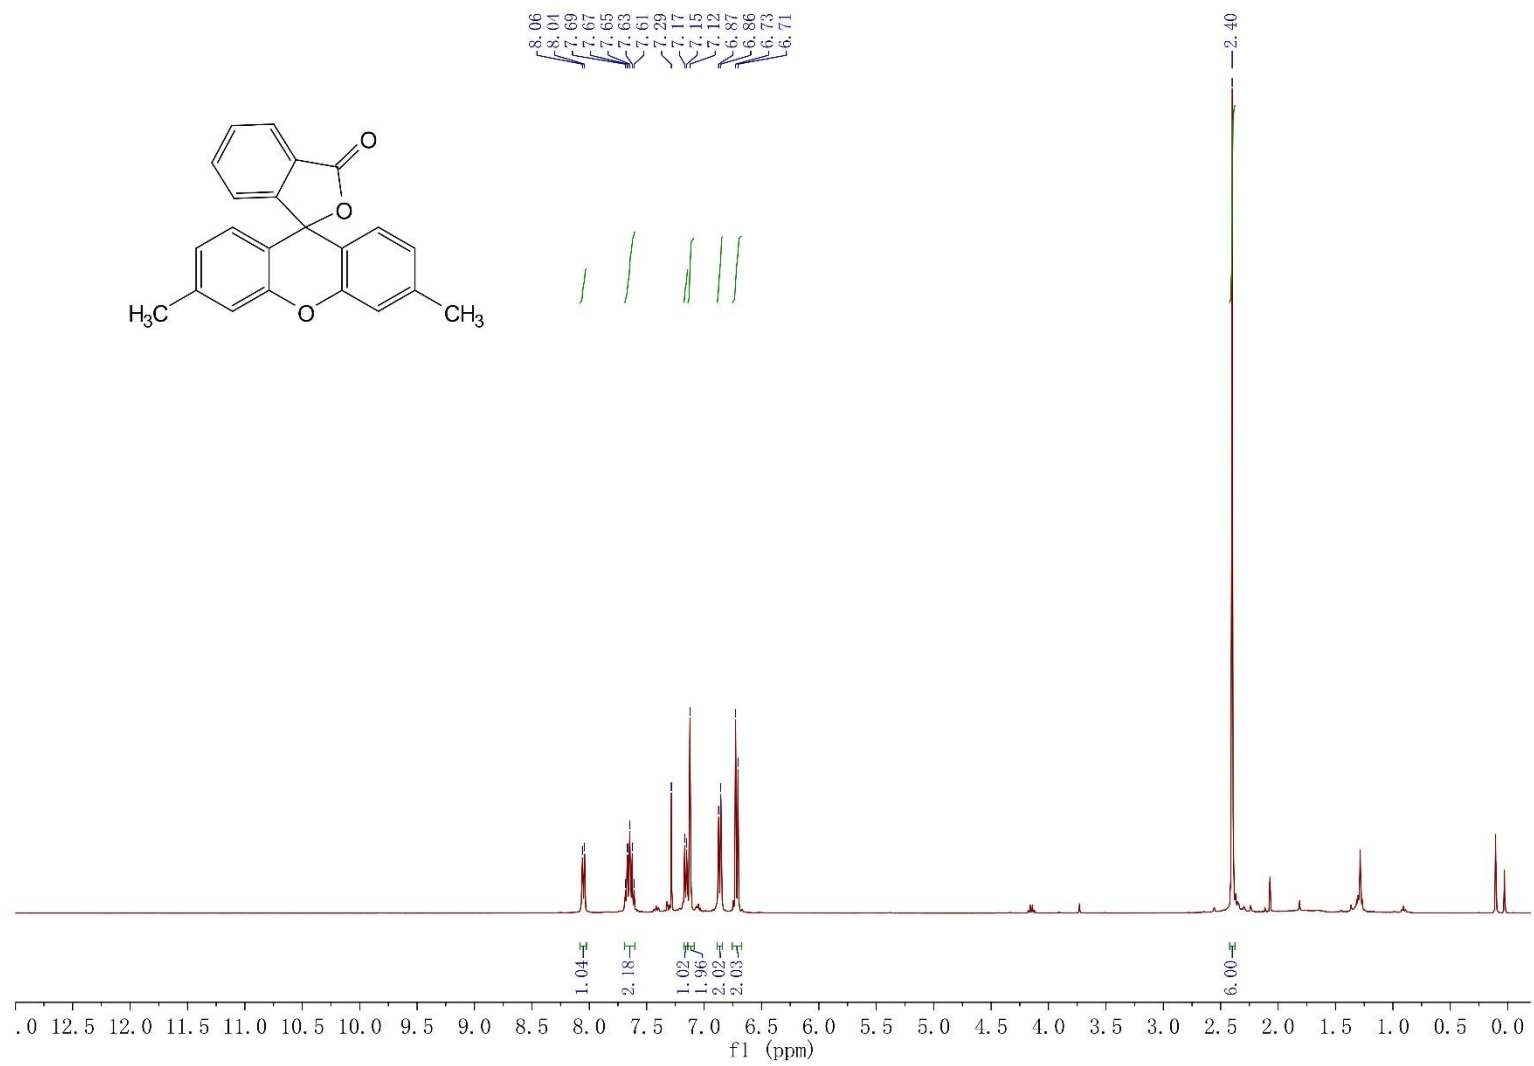

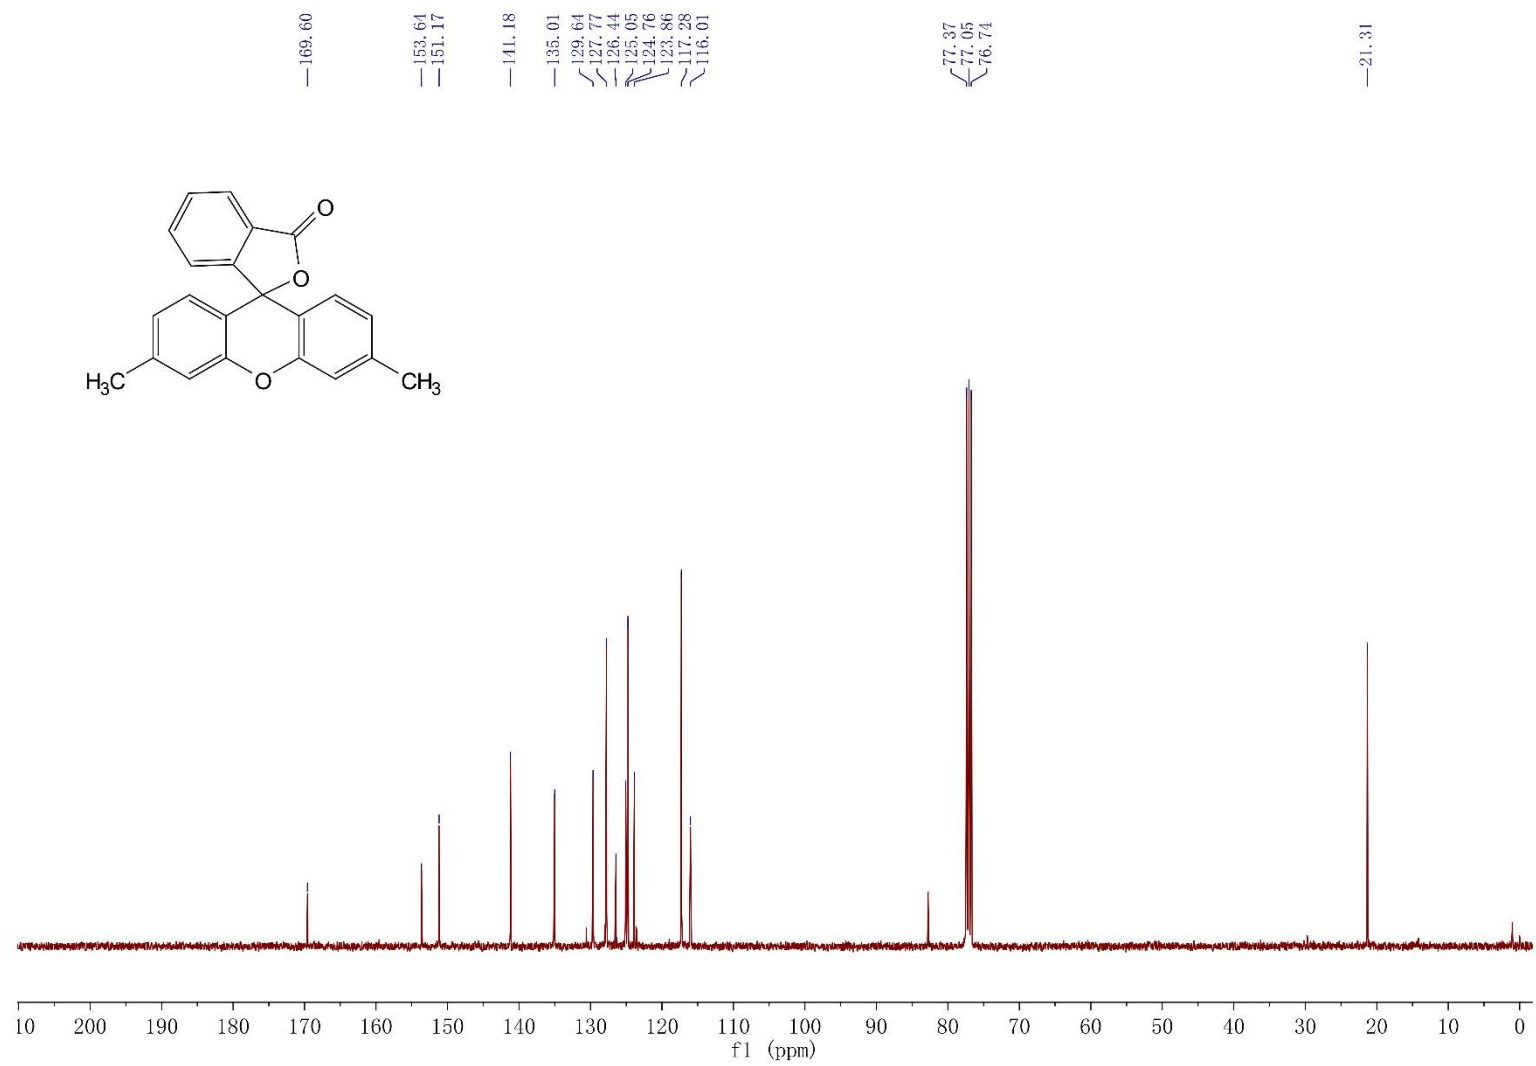

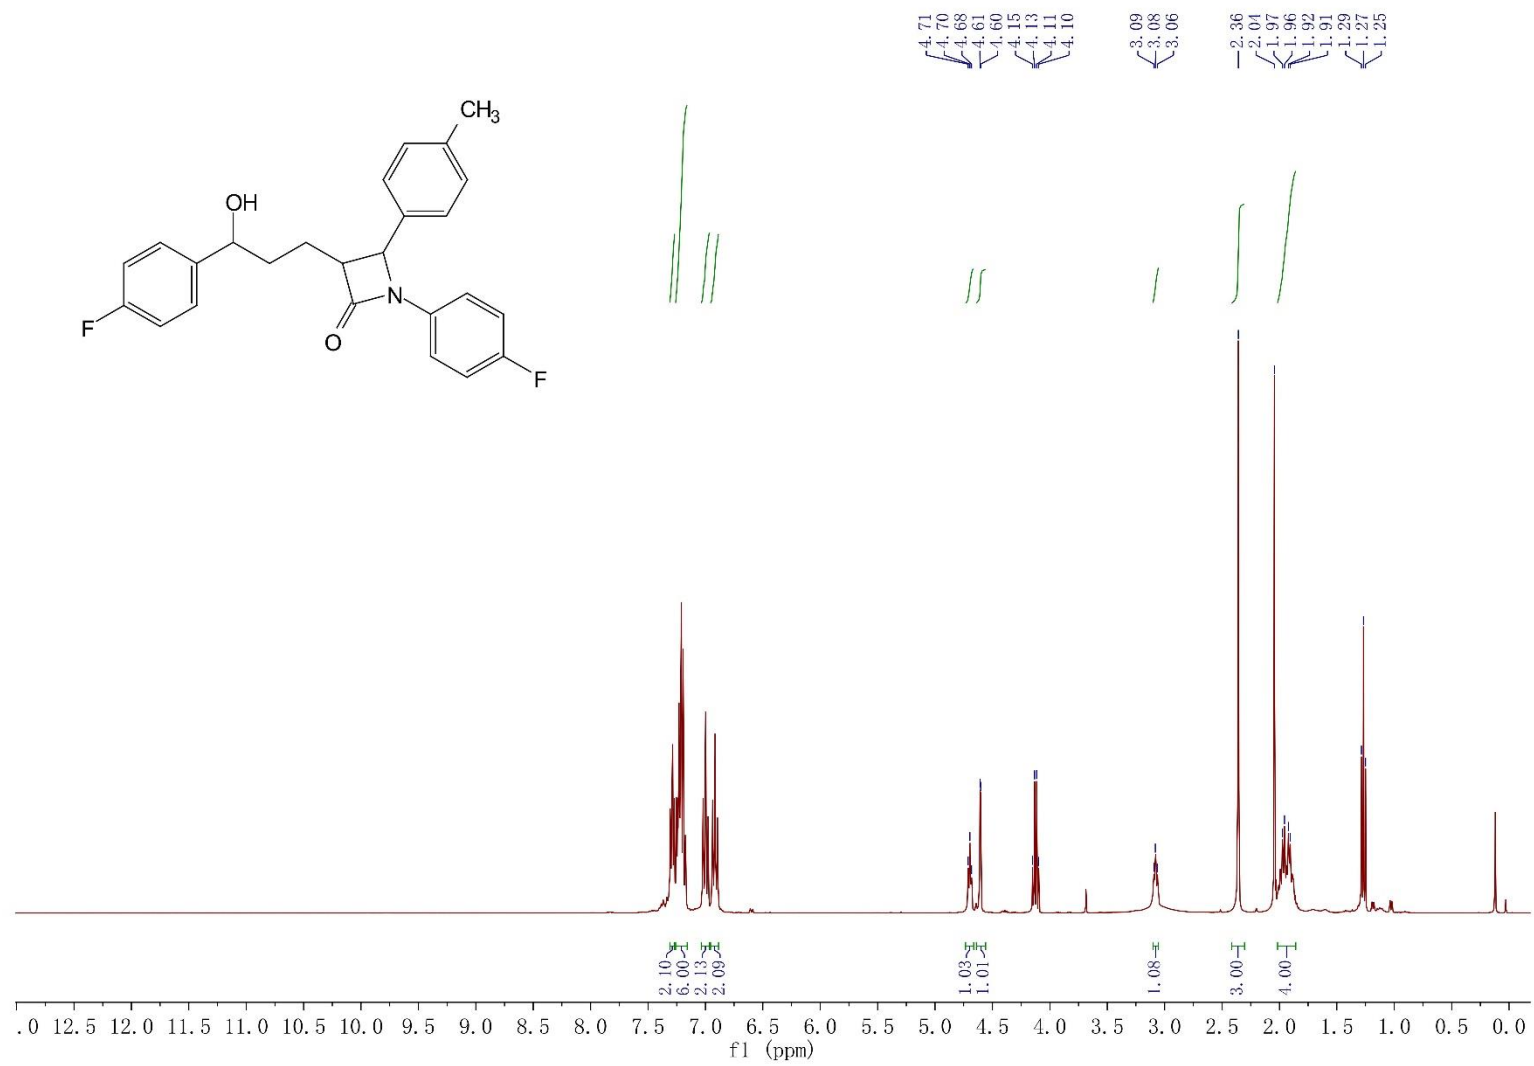

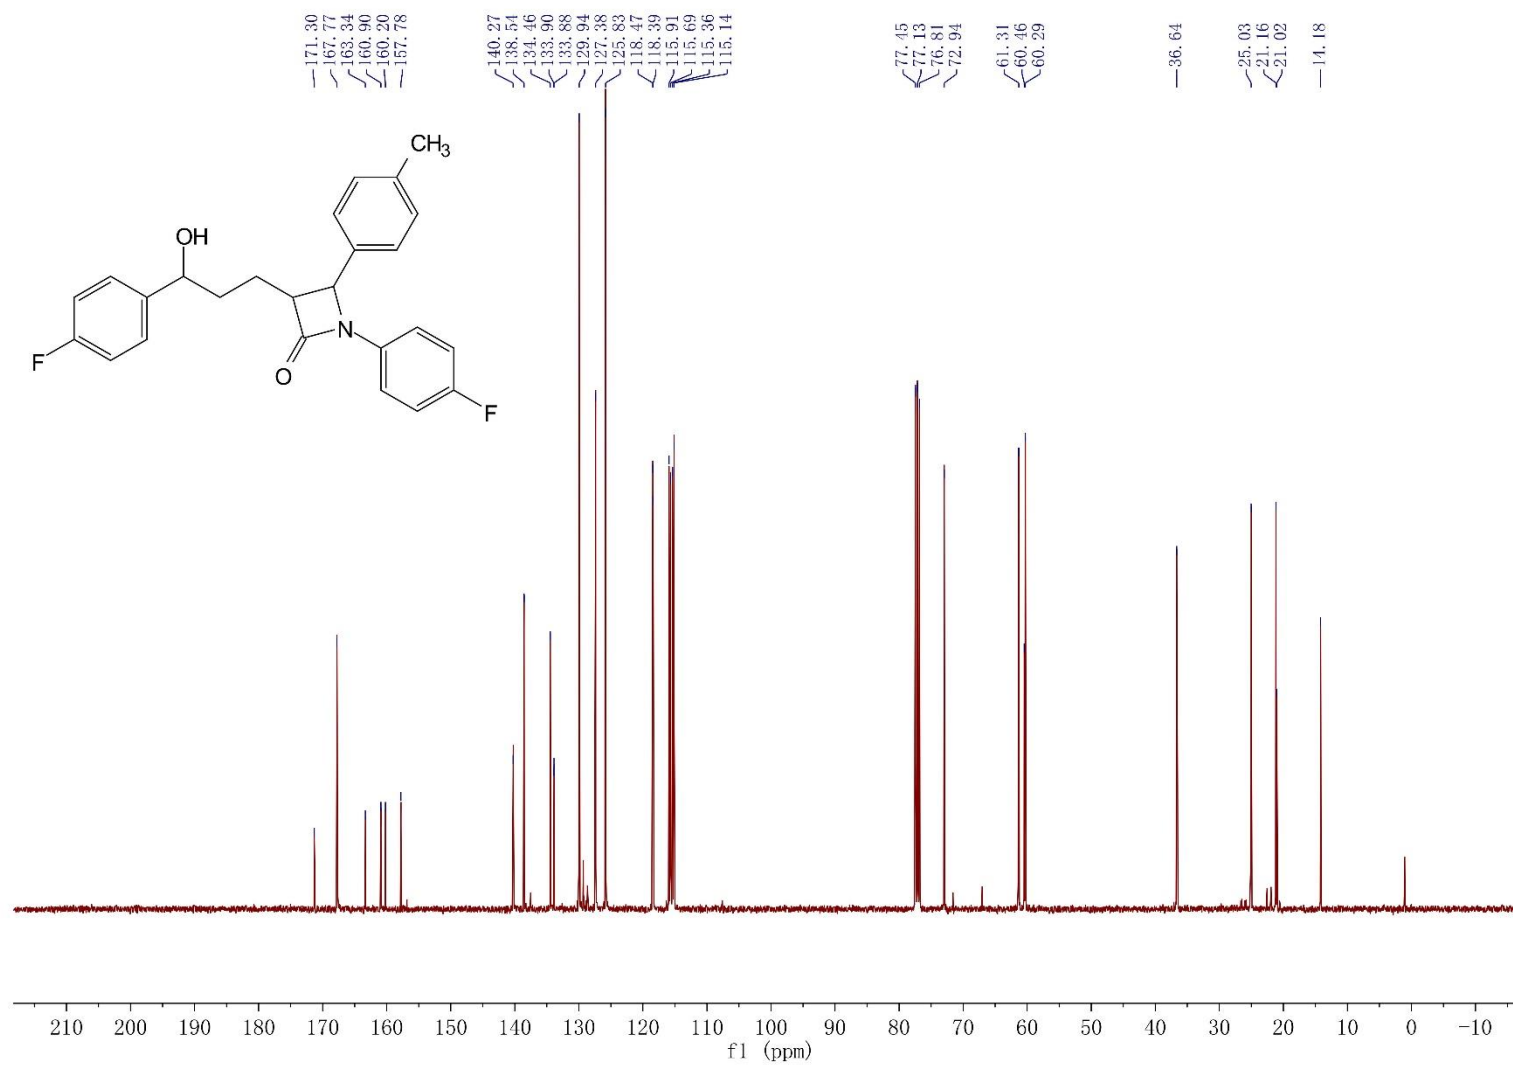

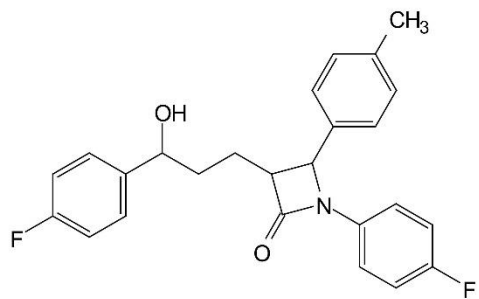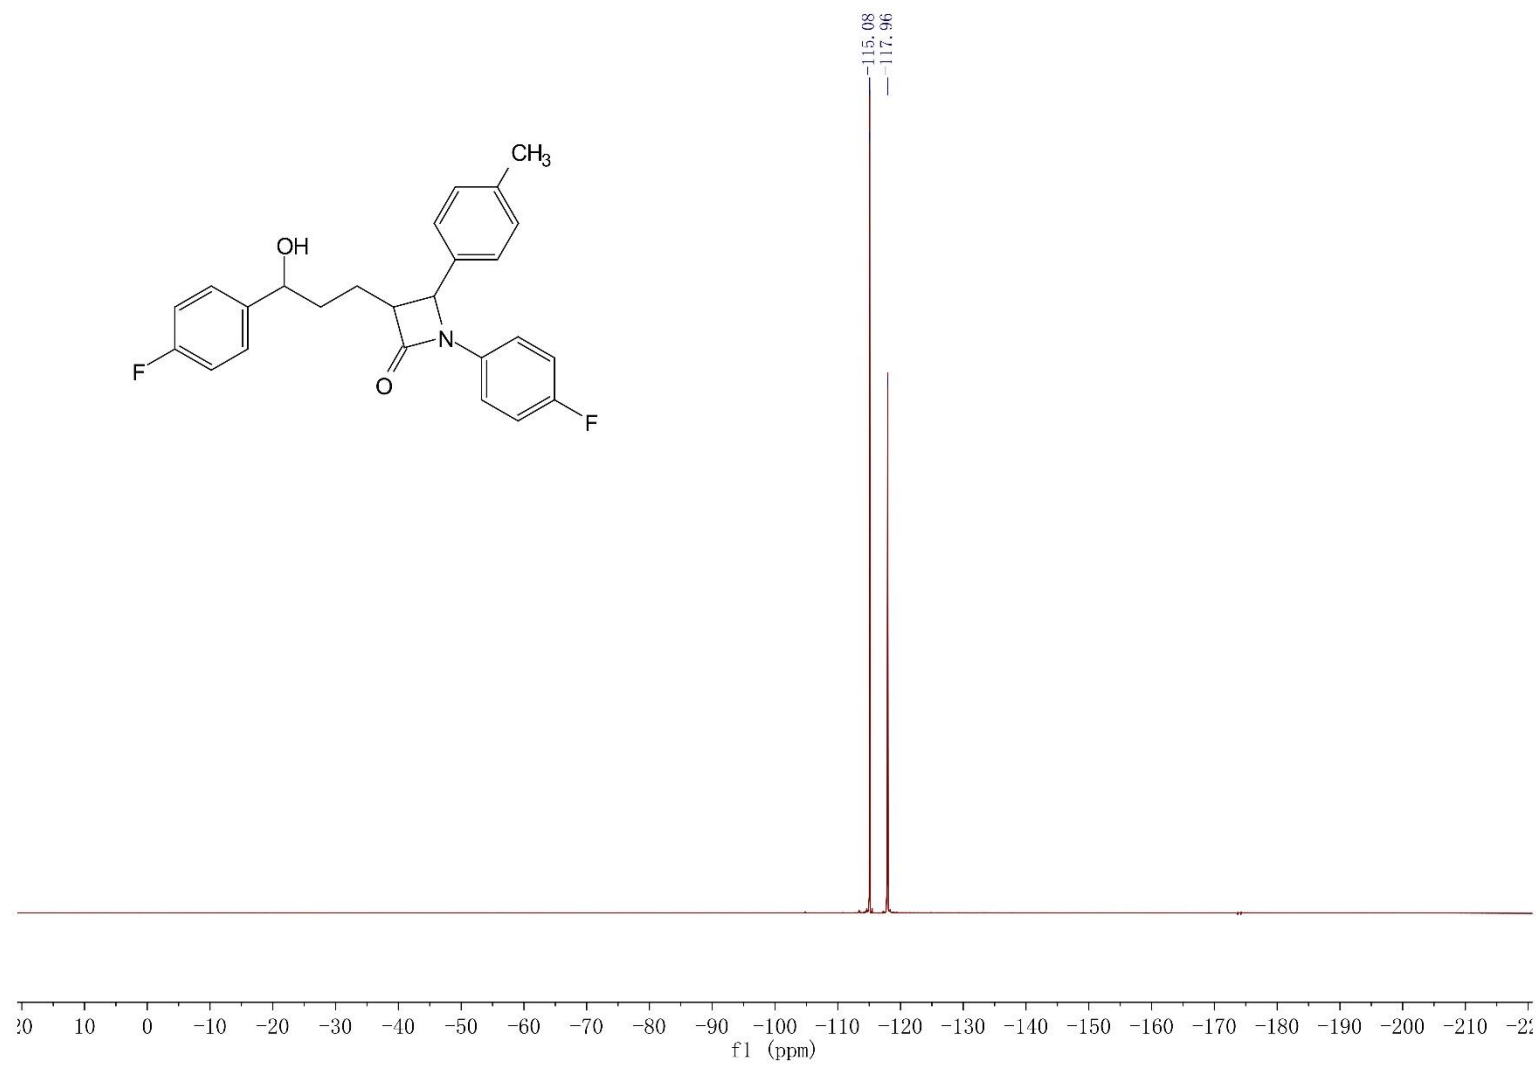

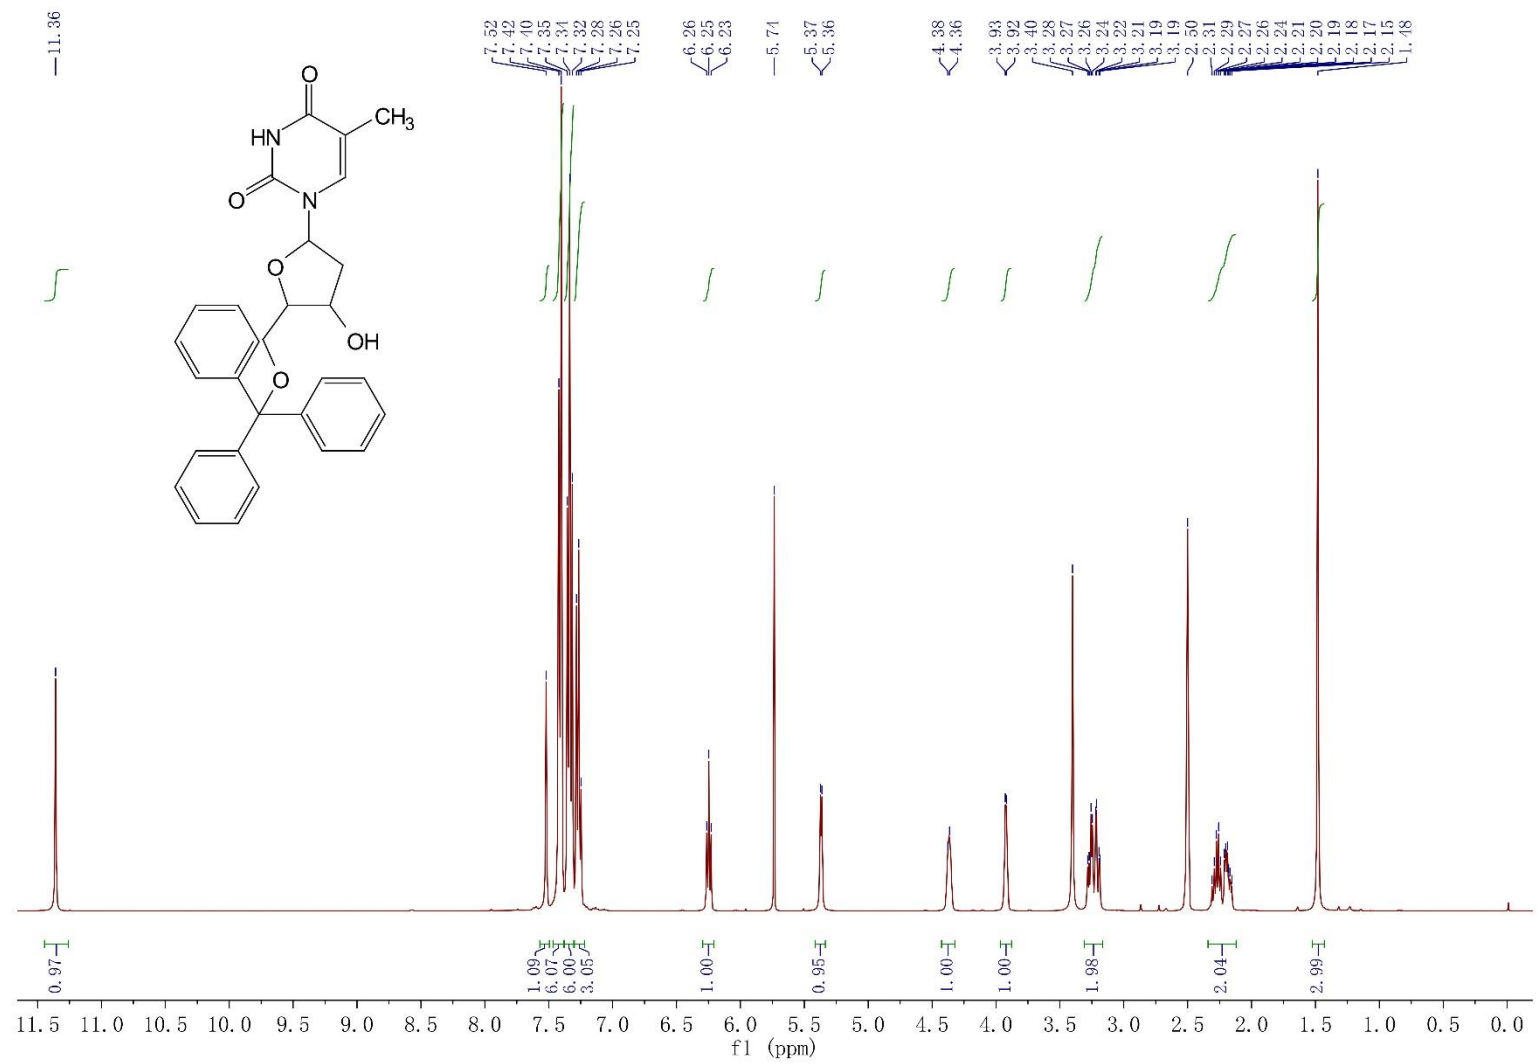

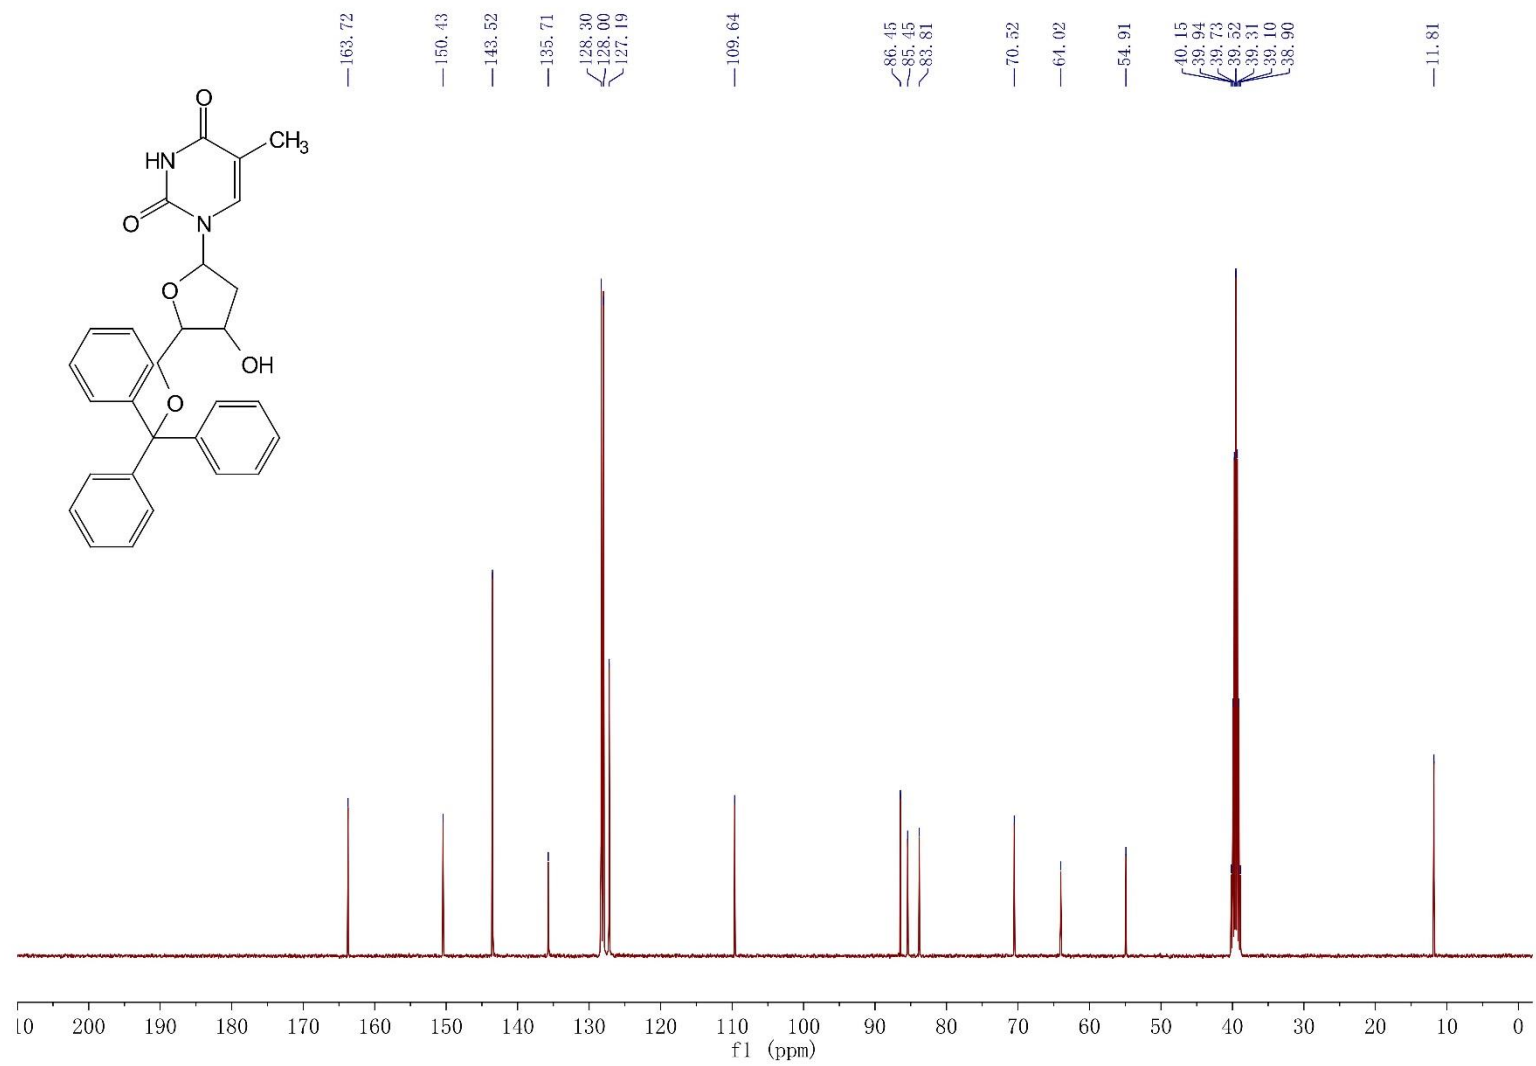

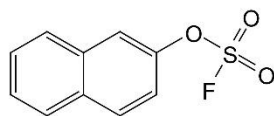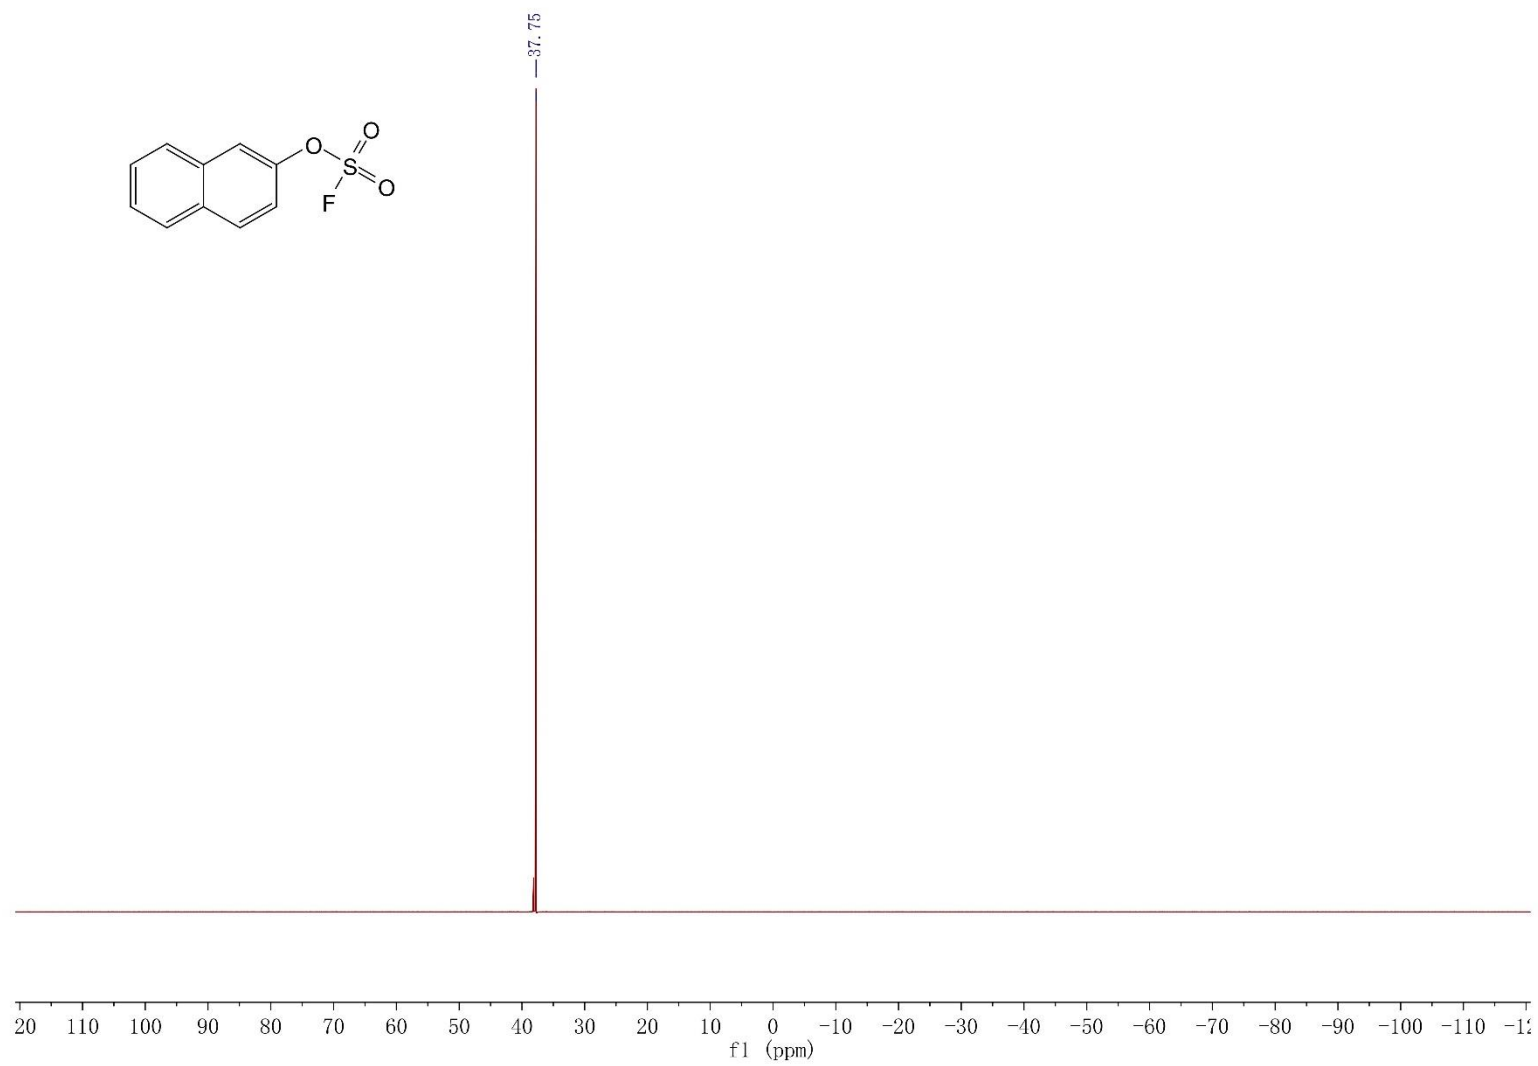

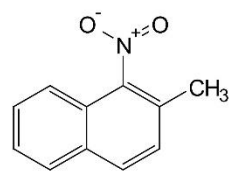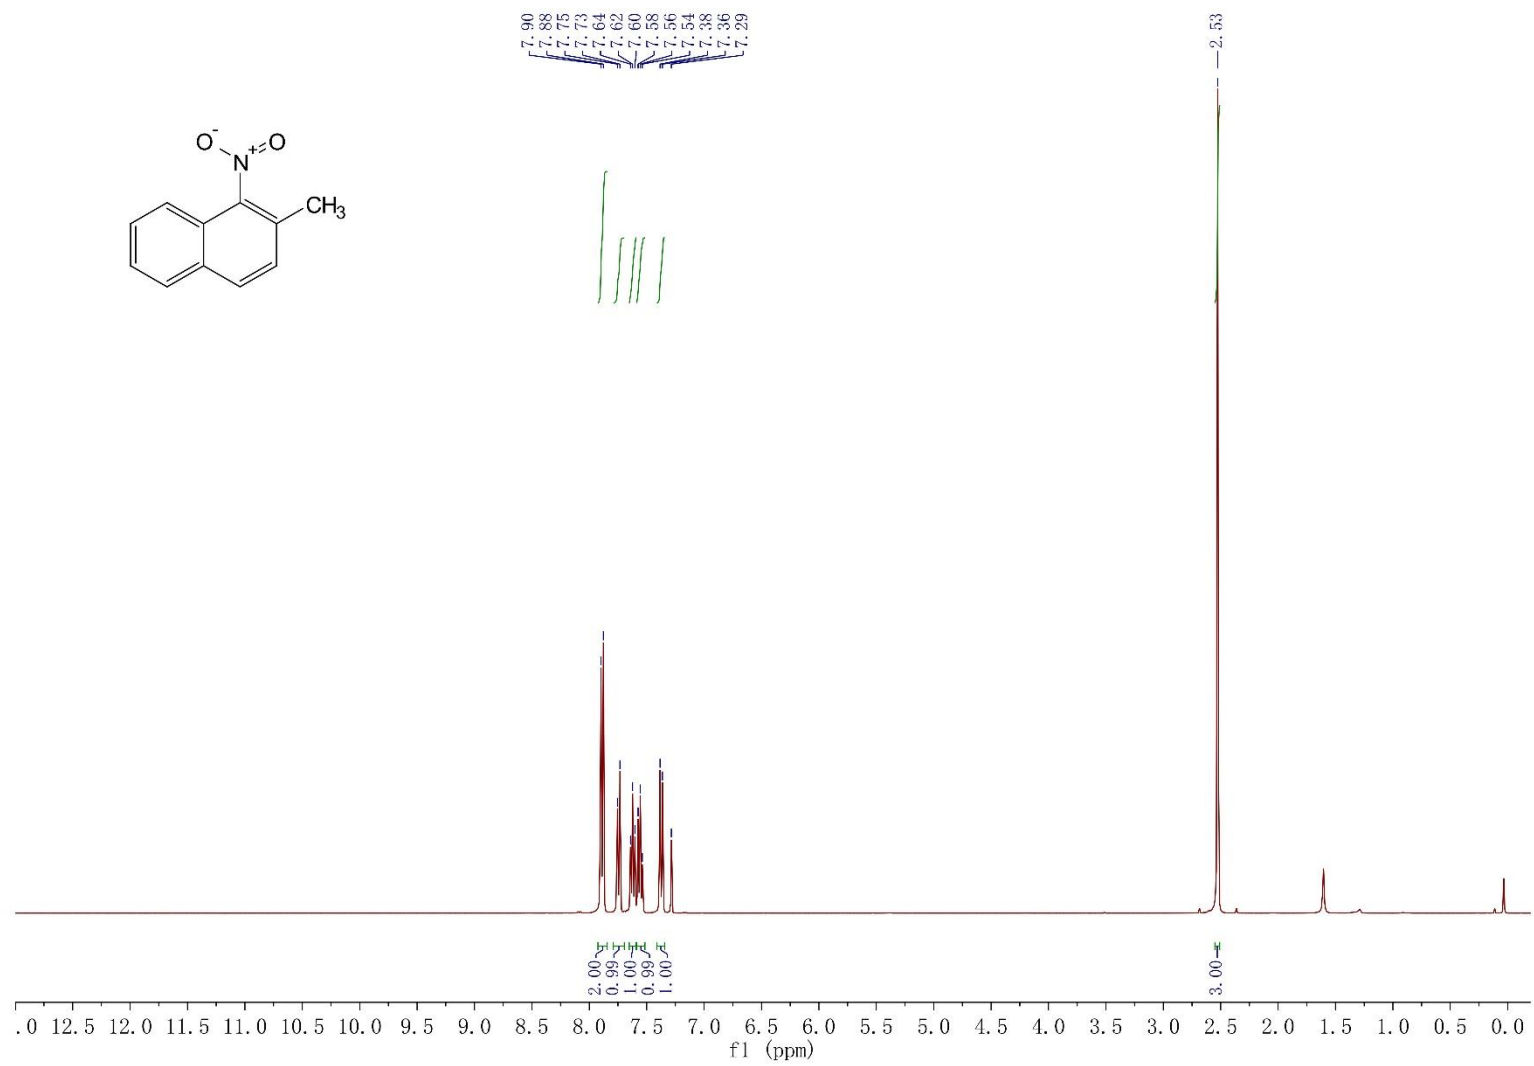

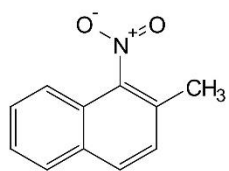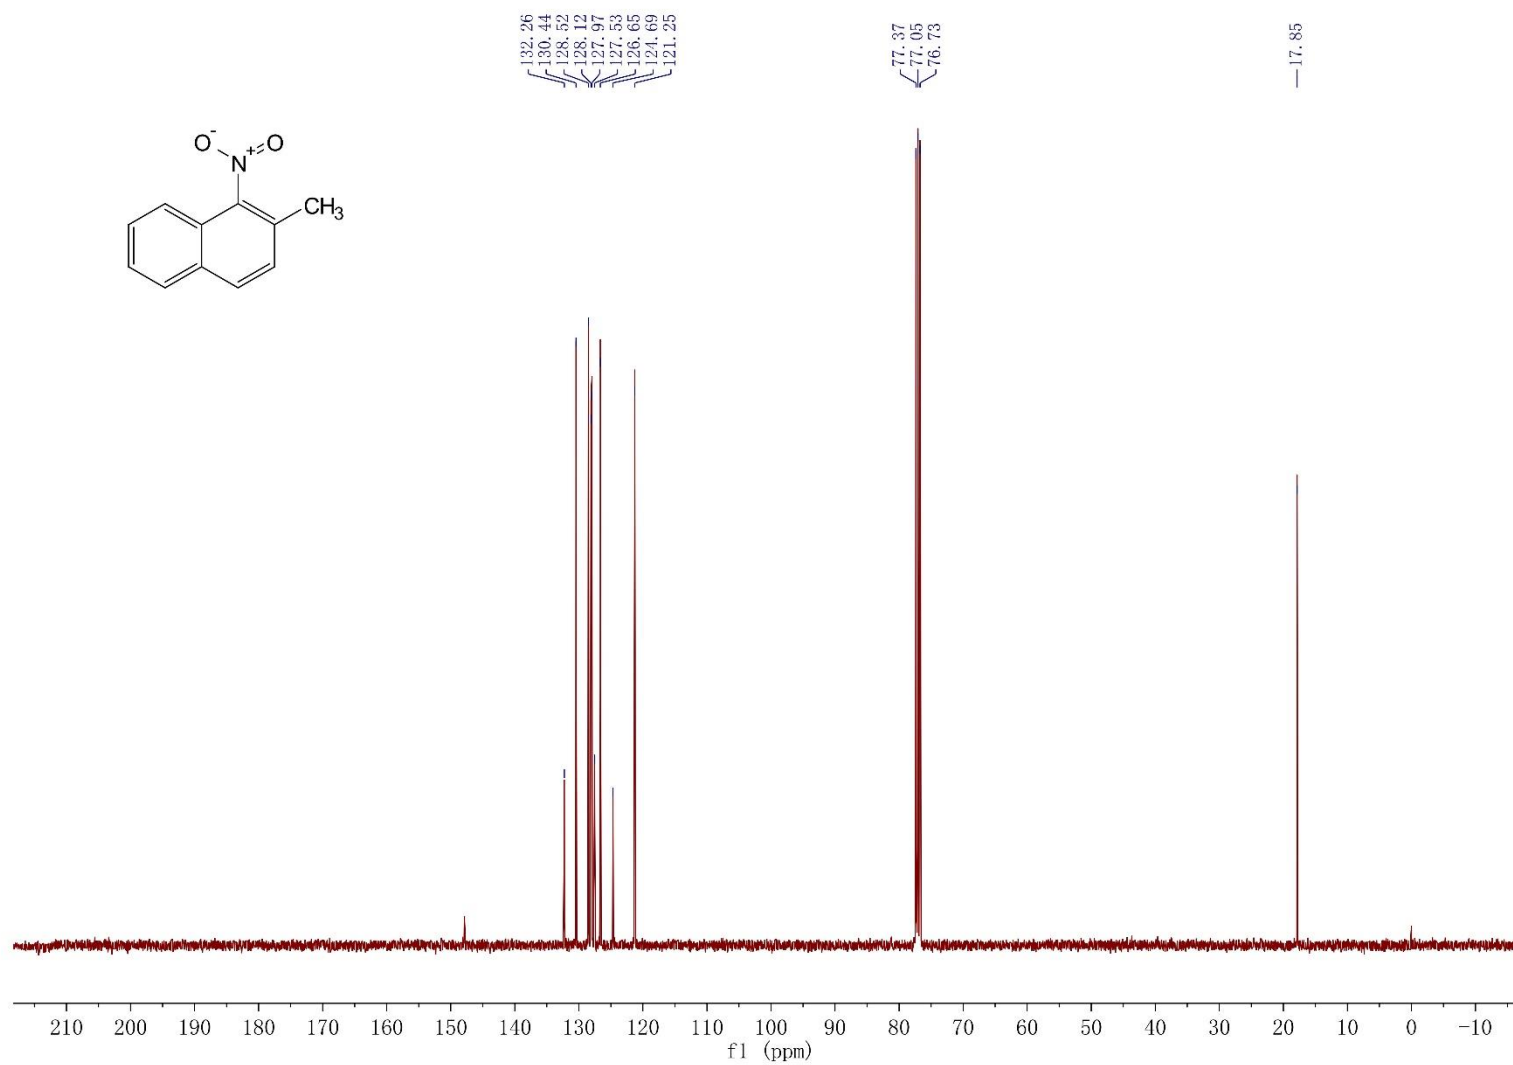

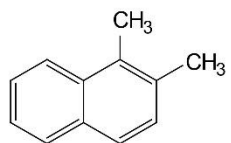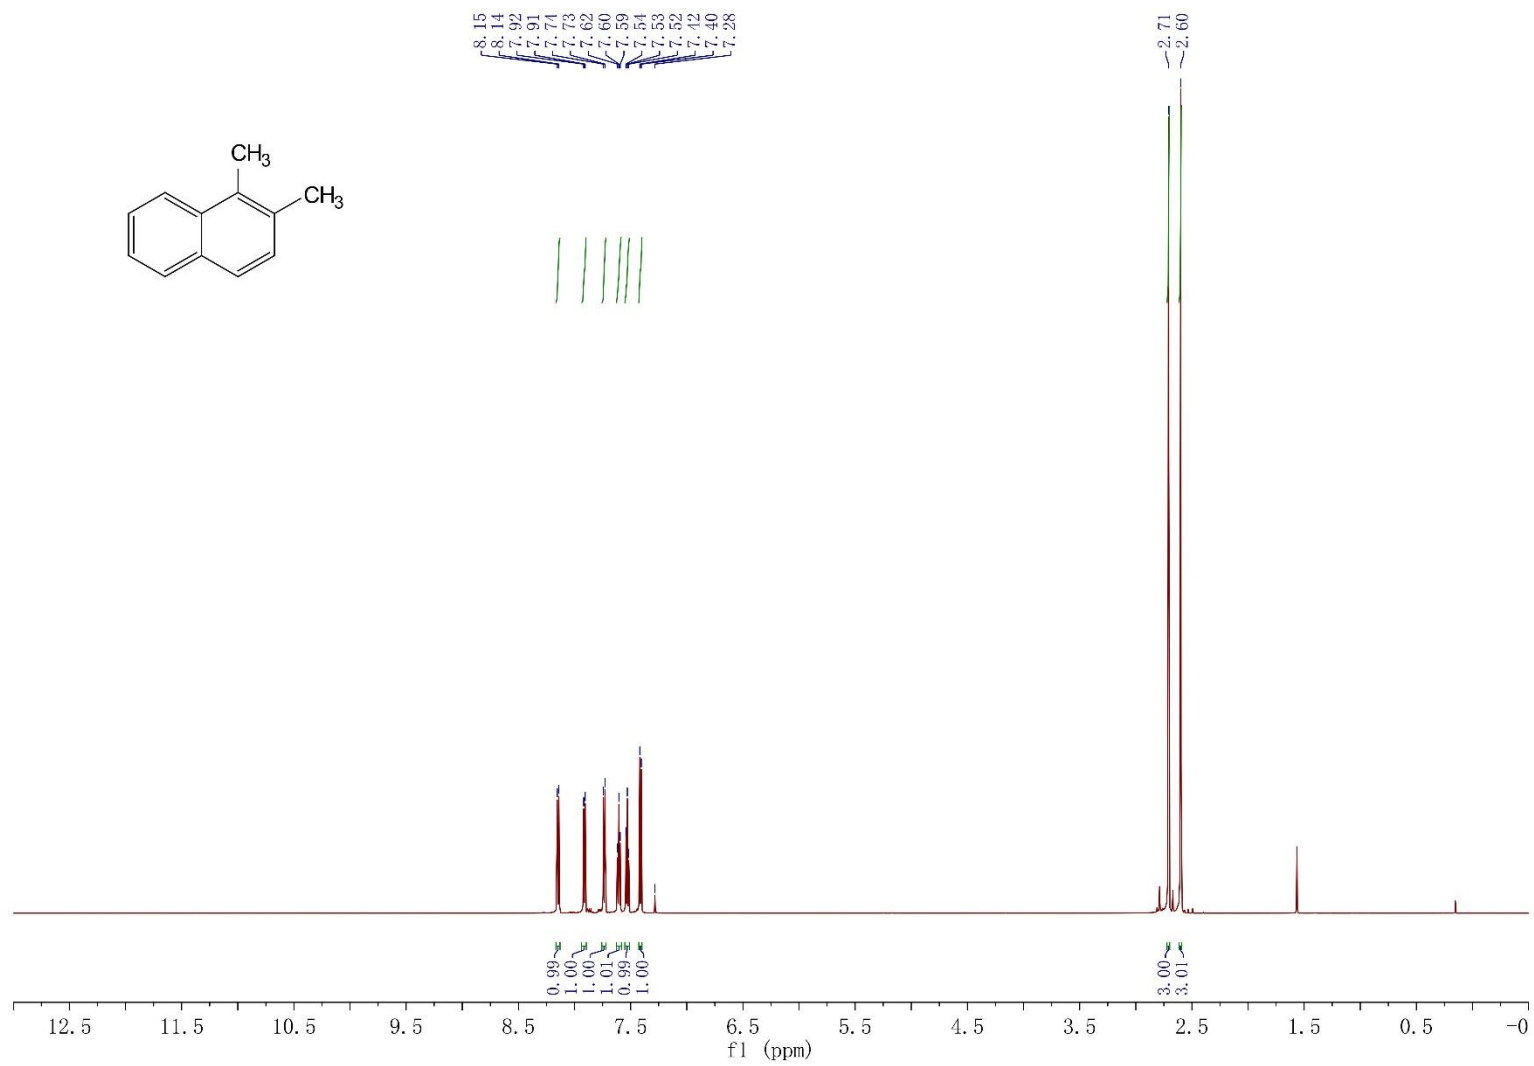

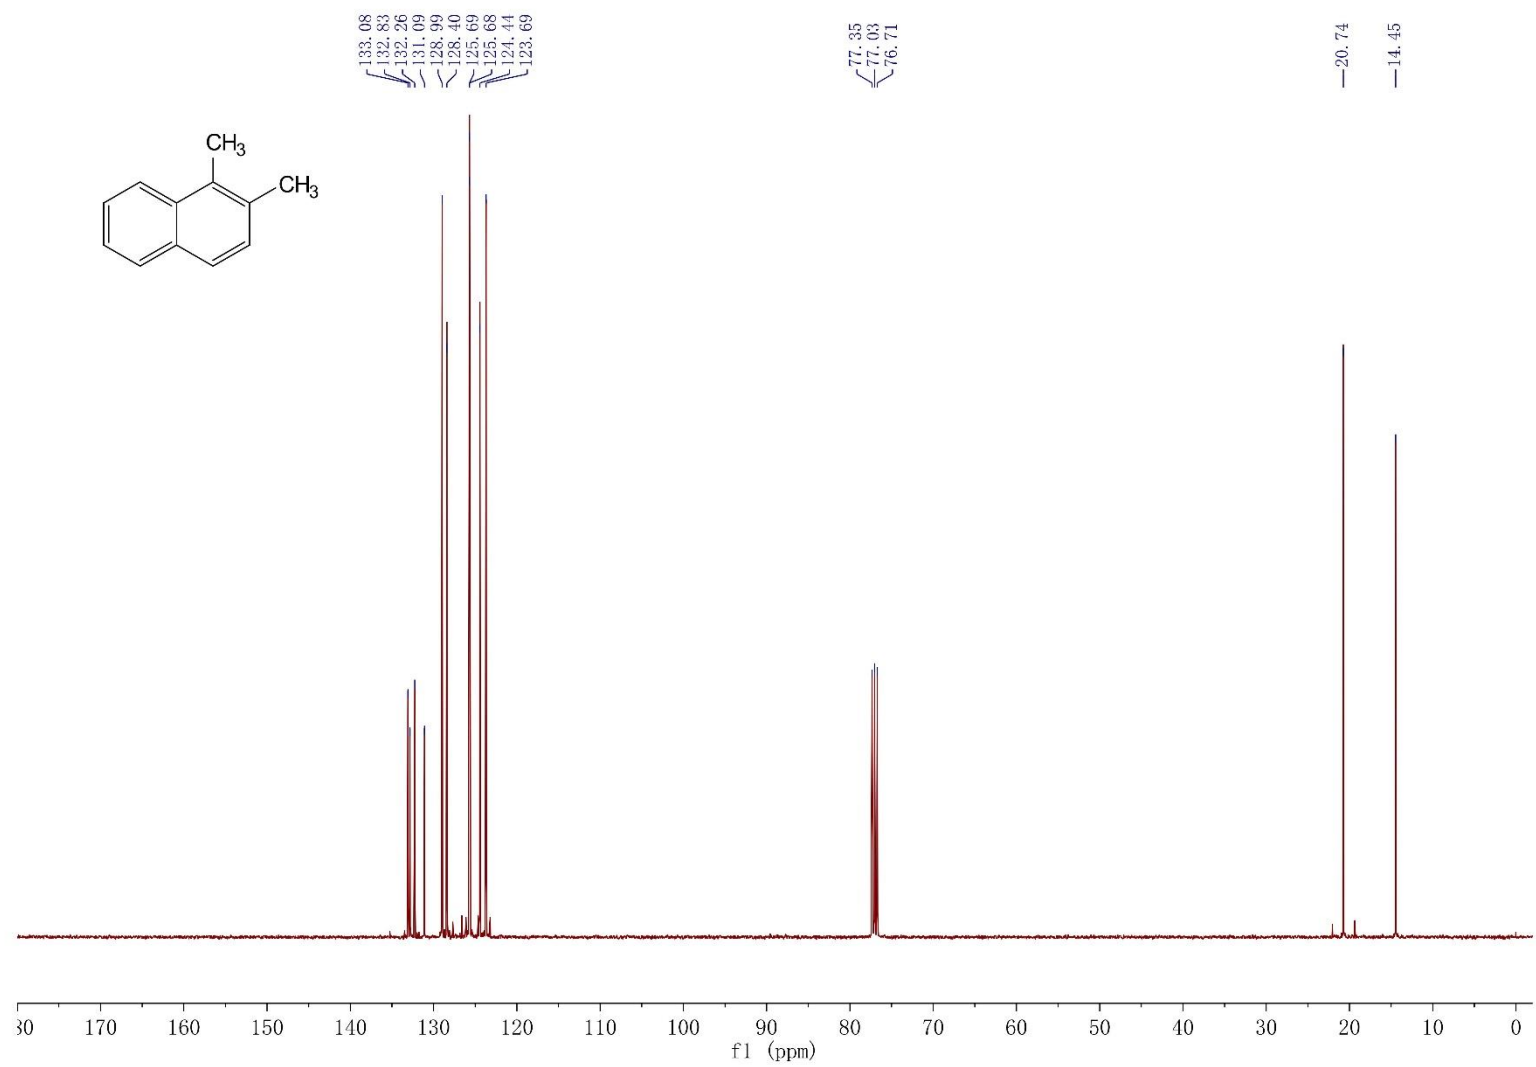

Supplement: d2ob01523d1.pdf [file d2ob01523d1.pdf]
